# Supplementary material for: A quest for the biological sources of long chain alkyl diols in the western tropical North Atlantic Ocean
Source: Copernicus journal article supplement (doi:10.5194/bg-15-5951-2018), 2018-10-10
Supplement: Supplementary file 1 [file bg-15-5951-2018-supplement.zip]

Archive with 3 entries (3 files):
- Supplementary Tables.xlsx
- Supplementary Figures.pdf
- bg-15-5951-2018-supplement-title-page.pdf
