# Supplementary material for: A quest for the biological sources of long chain alkyl diols in the western tropical North Atlantic Ocean
Source: Copernicus journal article supplement (doi:10.5194/bg-15-5951-2018), 2018-10-10
Supplement: Supplementary file 1 [file bg-15-5951-2018-supplement.zip › bg-15-5951-2018-supplement-title-page.pdf]

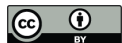

## *Supplement of*

# **A quest for the biological sources of long chain alkyl diols in the western tropical North Atlantic Ocean**

**Sergio Balzano et al.**

*Correspondence to:* Sergio Balzano ([sergio.balzano@nioz.nl](mailto:sergio.balzano@nioz.nl))

- [bg-15-5951-2018-supplement-title-page.pdf](#)
- [Supplementary Figures.pdf](#)
- [Supplementary Tables.xlsx](#)

The copyright of individual parts of the supplement might differ from the CC BY 4.0 License.
