# Supplementary material for: A quest for the biological sources of long chain alkyl diols in the western tropical North Atlantic Ocean
Source: Copernicus journal article supplement (doi:10.5194/bg-15-5951-2018), 2018-10-10
Supplement: Supplementary file 1 [file bg-15-5951-2018-supplement.zip › Supplementary Tables.xlsx]

## Sheet: Supplementary Table S1
Supplementary Table S1. List of species known to contain 1,x diols to date
Species or family	Class or division	Chain length	Functionalisation position	Reference
Apedinella radians	Dichtyochophyceae	28-32	1,14	Rampen et al. 2011
Heterosigma akashiwo	Raphidophyceae	30	1,13	Rampen unpublished
Haramonas dimorpha	Raphidophyceae	28-30	1,13	Rampen unpublished
Sarcinochrysis marina	Pelagophyceae	26-28	1,13	Rampen unpublished
Phaeomonas parva	Pinguiophyceae	24-26	1,13	Rampen unpublished
Chrysosphaera parvula	Chrysophyceae	32	1,15	Rampen unpublished
Monopsidaceae	Eustigmatophyceae	28-32	1,13; 1,15; 1,17	Rampen et al. 2014, Volkman et al. 1992
Eustogmataceae	Eustigmatophyceae	28-34	1,13; 1,15	Rampen et al. 2014, Volkman et al. 1999
Goniochloridaceae	Eustigmatophyceae	28-32	1,13; 1,14; 1,15	Rampen et al. 2014
Florenciella parvula	Dictyochophyceae	24	1,13; 1,14; 1,15	Rampen unpublished
Proboscia alata	Bacillariophyceae	28-32	1,14	Sinninghe Damsté et al. 2003, Rampen et al. 2009
Proboscia indica	Radial Centric Diatoms	28-32	1,14	Sinninghe Damsté et al. 2003, Rampen et al. 2009
Proboscia inermis	Radial Centric Diatoms	28-30	1,14	Rampen et al. 2007
Azolla filliculoides	Pteridophyta	30-36	1,11 ;1,13 ;1,15 ; 1,17	Speelman et al. 2009
Azolla imbricata	Pteridophyta	30-34	1,11; 1,13; 1,15	Mao et al. 2017
Osmunda regalis	Pteridophyta	28-32	1,11	Jetter and Riderer 1999
Funaria hygrometrica	Briophyta	32	1,7	Busta et al. 2016
Papaver alpinum	Magnoliophyta	22-30	1,7; 1,9; 1,11	Jetter et al. 1996
Pisum sativum	Magnoliophyta	26-28	1,12 to 1,17	Wen et al. 2006
Taxus baccata	Pinophyta	28-38	1,5	Wen and Jetter 2007
Triticum aestivum	Magnoliophyta	26-28	1,17;1,19;1,21	Racovita and Jetter 2016

## Sheet: Supplementary Table S2
Supplementary Table S2. HCC sample locations, main properties of the seawater sampled, diol concentration and number of 18S rRNA gene reads recovered from each sample
SampleID	Station	Depth	Descriptiona	Latitude	Longitude	δ13C	Phosphate	Ammonium	Nitrite	Nitrate	Silica		Pyrosequencing reads			No of OTUs (95 %)			Long chain alkyl diols
		(m)		(°N)	(°E)	d13C	µM	µM	µM	µM	µM		Total	LCD-producers		Total	LCD-producers		C28 1,13	C28 1,14	C30 1,13	C30 1,14	C30 1,15	C32 1,15
HCC0-5	0	5	Surface	15.5413	-28.9471	-21.25	NA	NA	NA	NA	NA		1160	0		150	0		1.9722	6.98215	4.71278	3.56746	186.685	9.93978
HCC0-60	0	60	DCM	15.5413	-28.9471	-21.63	NA	NA	NA	NA	NA		1652	2		235	1		8.02916	26.4612	6.95759	4.04807	368.801	5.32505
HCC1-5	1	5	Surface	15.0159	-30.5602	-20.43	0.01	0.195	0.009	0.05	0.92		4912	0		362	0		6.68929	23.4263	12.4332	9.18946	1136.29	6.46303
HCC1-40	1	40	BWML	15.0159	-30.5602	-19.72	0.01	0.073	0.004	0.02	0.91		1871	0		368	0		6.94027	24.6748	8.85337	4.98152	608.513	3.7988
HCC1-80	1	80	DCM	15.0159	-30.5602	-23.49	0.2	0.055	0.043	0.81	1.75		2352	2		270	1		0	21.3592	0	0	558.568	0
HCC2-5	2	5	Surface	14.3504	-32.5769	-20.27	0	0.106	0.003	0.03	0.72		2259	0		304	0		4.40326	15.2976	0	0	170.694	0
HCC2-33	2	33	BWML	14.3504	-32.5769	-19.73	0.01	0.095	0.01	0.02	0.72		1875	0		361	0		0	26.5792	0	0	246.181	0
HCC2-65	2	65	DCM	14.3504	-32.5769	-21.71	0.23	0.098	0.034	0.99	1.88		1818	0		323	0		8.99541	25.4015	0	0	127.343	0
HCC3-5	3	5	Surface	13.161	-36.2092	-20.33	0	0.058	0	0	0.79		3154	27		483	3		3.93289	11.315	59.6419	19.6597	2617.37	22.6301
HCC3-35	3	35	BWML	13.161	-36.2092	-20.14	0	0.05	0	0	0.73		2349	0		452	0		0	8.48211	27.0963	16.1611	2694.11	11.1348
HCC3-90	3	90	DCM	13.161	-36.2092	-23.9	0.36	0.059	0.139	5.63	1.77		2722	6		313	1		9.31438	21.5337	2.31555	1.25194	197.435	1.87886
HCC4-5	4	5	Surface	12.407	-38.502	-20.26	0	0.089	0	0.01	0.96		4662	1		442	1		5.37553	16.804	29.9131	13.2447	2038.18	20.9937
HCC4-30	4	30	BWML	12.407	-38.502	-20.24	0.01	0.067	0	0.01	0.89		5295	0		465	0		6.98871	14.3314	26.8429	18.0715	2773.47	11.8814
HCC4-83	4	83	DCM	12.407	-38.502	-23.95	0.04	0.109	0	0.01	1.22		3207	1		399	1		0	18.2834	7.61496	4.68331	540.317	4.45972
HCC5-5	5	5	Surface	10.8289	-40.47	-20.97	0.02	0.05	0	0.01	0.91		1597	3		250	2		6.39856	18.1717	25.312	11.19	1432.54	17.2041
HCC5-40	5	40	BWML	10.8289	-40.47	-19.98	0.03	0.05	0.001	0.01	1.02		4639	0		507	0		8.91497	20.2571	24.2795	15.5022	2281.38	9.97829
HCC5-80	5	80	DCM	10.8289	-40.47	-24.09	0.53	0.066	0.318	7.87	3		3742	2		549	1		4.82821	15.4494	5.36905	5.70693	528.329	4.04431
HCC-6-5			Surface	9.41289	-42.0965	-21.1716	0	0.0586667	0	0.01	0.869333		NA	NA		NA	NA		3.97713	15.0974	1.65644	11.9631	2087.3	10.3344
HCC6-15	6	15	BWML	9.41289	-42.0965	-21.44	0	0.05	0	0.01	0.89		4306	0		395	0		5.33467	21.1301	12.5973	7.4471	1273.29	7.72297
HCC6-90	6	90	DCM	9.41289	-42.0965	-23.78	0.52	0.069	0.274	8.75	2.92		6404	3		520	2		0	15.3997	0	5.32273	145.76	3.41825
HCC7-15	7	15	BWML	7.51994	-44.2834	-20.46	0.01	0.05	0	0.01	5.66		3918	0		416	0		8.13212	23.6397	44.9742	144.913	3659.31	16.873
HCC7-60	7	60	DCM	7.51994	-44.2834	-21.09	0.05	0.057	0.163	-0.01	1.05		4821	0		483	0		0	0	24.8179	2.432	49.54	170.344
HCC-8-5			Surface	6.48736	-45.4497	-19.5641	0.0144	0.0548	0.0012	0.0088	10.1236		NA	NA		NA	NA		0	27.4978	66.4641	179.208	6377.67	27.5892
HCC8-10	8	10	BWML	6.48736	-45.4497	-19.56	0.01	0.055	0.001	0.01	10.12		4963	1		450	1		0	0	91.0363	213.757	8035.07	37.3512
HCC8-52	8	52	DCM	6.48736	-45.4497	-22.83	0.02	0.074	0.019	0	1.36		2581	0		398	0		0	0	9.10863	8.06897	512.229	21.9559
HCC9-5	9	5	Surface	5.59615	-46.4003	-21.39	0.02	0.208	0	0.01	11.88		4910	0		516	0		3.54689	14.2365	23.7221	14.7631	1931.42	10.5992
HCC9-40	9	40	DCM	5.59615	-46.4003	-22.98	0.09	0.069	0.458	0.1	2.89		1818	0		258	0		8.0927	21.4398	12.4	11.4062	842.259	19.8876
HCC10-5	10	5	Surface	6.68407	-47.4876	-20.38	0.01	0.064	0	0.01	13.64		1749	1		310	1		55.2957	5.63849	184.495	104.477	13291.2	218.891
HCC10-9	10	9	BWML	6.68407	-47.4876	-17.78	0.01	0.053	0	0.01	13.24		2216	1		329	1		0	2.96639	50.4677	40.5524	5777.98	27.7832
HCC10-50	10	50	DCM	6.68407	-47.4876	-21.12	0.02	0.066	0.007	0	1.26		3983	0		312	0		4.93068	13.259	26.2438	28.3858	2884.07	14.0542
HCC11-5	11	5	Surface	5.52998	-51.491	-19.32	0.07	0.062	0.003	0.01	18.34		2400	0		374	0		0	23.4807	4.18086	5.1184	386.825	4.44656
HCC11-15	11	15	BWML	5.52998	-51.491	-20.65	0.06	0.055	0.088	0.07	1.87		6340	0		367	0		0	0	4.13774	11.9318	524.551	14.0306
HCC12-5	12	5	Surface	6.06735	-52.4615	-20.81	0.09	0.105	0.003	0.01	3.14		4094	0		322	0		0	11.885	0	4.96868	91.6518	5.79579
HCC12-15	12	15	BWML	6.06735	-52.4615	-19.62	0.09	0.087	0.012	0	2.94		1469	22		274	4		18.6702	64.9373	8.67594	27.8404	554.124	15.6272
HCC13-3	13	3	Surface	7.59981	-53.0238	-20.22	0.01	0.111	0	0.01	10.43		2633	10		198	2		15.1081	45.1477	16.4068	46.3416	1847.5	12.9204
HCC13-35	13	35	DCM	7.59981	-53.0238	-20.89	0.08	0.085	0.004	0.01	2.97		3614	0		245	0		0	15.0931	6.74175	16.4989	411.206	7.23413
HCC14-5	14	5	Surface	9.53396	-51.3187	-19.52	0.01	0.051	0.001	0.01	11.77		3772	6		280	2		12.5582	37.1303	9.23591	105.187	14099.9	54.7856
HCC-14-10			Surface	9.53396	-51.3187	-19.5194	0.007	0.0507143	0.00128571	0.00871429	11.7713		NA	NA		NA	NA		0	0	78.9915	100.181	8150.32	29.4406
HCC14-60	14	60	DCM	9.53396	-51.3187	-19.81	0.03	0.078	0.037	0	1.12		4812	4		524	2		6.55183	18.9458	13.3244	15.1086	1410.69	10.9155
HCC15-5	15	5	Surface	8.94799	-49.98	-20.26	0.04	0.05	0	0.01	8.99		3074	7		336	1		8.20391	24.951	190.033	46.8145	4340.12	481.884
HCC15-11	15	11	BWML	8.94799	-49.98	-19.74	0.04	0.05	0.001	0.01	8.82		2238	6		224	1		0	13.9616	29.9535	30.4185	3954.55	12.4866
HCC15-45	15	45	DCM	8.94799	-49.98	-22.29	0.01	0.087	0.039	0	1.23		3453	0		409	0		0	5.86739	3.17562	2.49493	122.018	5.70616
HCC16-5	16	5	Surface	10.2209	-51.8835	-20.55	0.02	0.063	0	0.01	5.8		1647	0		280	0		2.72855	10.7092	5.73314	6.33724	740.131	3.58324
HCC16-22	16	22	BWML	10.2209	-51.8835	-19.43	0.03	0.051	0	0.01	3.94		1638	0		287	0		6.6665	23.3409	26.7952	34.8437	3172.49	11.7713
HCC16-77	16	77	DCM	10.2209	-51.8835	-23.21	0.15	0.05	0.056	2.05	1.52		4081	0		462	0		4.26226	15.7746	2.65089	3.88746	173.584	1.9568
HCC17-3	17	3	Surface	9.90443	-53.2713	-20.31	0.01	0.05	0	0.01	13.75		1818	0		300	0		6.30025	23.1505	140.006	111.081	15984.5	31.577
HCC17-10	17	10	BWML	9.90443	-53.2713	-19.38	0.01	0.05	0	0.01	9.85		4079	0		451	0		5.39117	17.523	72.0144	63.917	7819.35	17.5282
HCC17-45	17	45	DCM	9.90443	-53.2713	-21.96	0.11	0.05	0.007	0	2.7		2044	2		282	1		3.782	12.9023	2.68945	2.33951	185.015	2.9683
HCC18-5	18	5	Surface	9.37123	-55.2011	-20.21	0.02	0.065	0.001	0.01	7.41		4486	4		445	1		4.60333	17.163	23.9963	16.2047	2140.75	25.3196
HCC18-13	18	13	BWML	9.37123	-55.2011	-19.71	0.03	0.07	0.001	0.01	6.42		4471	2		323	1		7.88462	29.6291	71.6257	48.9452	9159.59	25.65
HCC18-66	18	66	DCM	9.37123	-55.2011	-21.82	0.16	0.082	0.1	1.77	1.92		1876	14		308	3		3.9879	14.5154	1.77077	1.64092	105.634	2.59188
HCC19-4	19	4	Surface	10.5163	-55.4761	-20.35	0.03	0.096	0	0.01	7.03		2939	0		245	0		3.97686	14.2472	3.5513	4.83321	378.227	5.2559
HCC19-12	19	12	BWML	10.5163	-55.4761	-19.9	0.03	0.076	0	0.01	6.28		2903	2		309	1		5.29724	20.6206	10.8453	13.1315	1127.74	7.49124
HCC19-60	19	60	DCM	10.5163	-55.4761	-22.43	0.05	0.081	0.026	0.05	1.45		5640	1		446	1		4.39076	18.1254	1.65614	2.55738	114.703	10.9192
HCC20a-5	20a	5	Surface	11.2739	-54.1574	-20.6	0.05	0.063	0	0.01	7.45		5924	0		389	0		3.42261	12.8279	23.4929	15.873	2693.25	8.33605
HCC20a-15	20a	15	BWML	11.2739	-54.1574	-19.72	0.06	0.061	0	0.01	5.72		9172	6		530	2		7.41005	23.8393	50.5599	40.3398	6768.37	18.3846
HCC20a-65	20a	65	DCM	11.2739	-54.1574	-22.69	0.02	0.059	0.001	0.01	1.17		1454	5		262	1		3.93618	13.3179	1.42743	1.81441	81.5661	2.63962
HCC20b-5	20b	5	Surface	11.4717	-54.2077	-20.33	0.03	0.084	0	0.01	6.26		4303	0		269	0		5.83534	2.81278	11.6495	10.3392	1175.24	7.90833
HCC20b-15	20b	15	BWML	11.4717	-54.2077	-19.94	0.01	0.062	0	0.01	3.5		4566	2		312	1		5.48456	18.2484	10.8323	9.22157	1152.93	12.7702
HCC20b-80	20b	80	DCM	11.4717	-54.2077	-21.45	0	0.075	0.002	0.01	1.04		2507	1		326	1		2.08436	5.58937	0	0	86.7089	0
HCC21a-5	21a	5	Surface	13.0181	-54.6688	-20.09	0	0.065	0	0.01	4.36		2268	0		322	0		4.71551	17.1726	14.2932	17.748	1831.4	7.81244
HCC21a-15	21a	15	BWML	13.0181	-54.6688	-19.38	0	0.054	0	0.01	2.3		3551	1		331	1		5.0747	15.6752	49.3148	51.3737	4783.66	15.7215
HCC21a-95	21a	95	DCM	13.0181	-54.6688	-22.14	0.04	0.052	0.116	0.66	1.15		4009	0		407	0		4.92449	14.6462	1.41482	1.69323	97.665	2.23762
HCC-21b-5			Surface	13.1985	-54.7185	-20.7076	0.001	0.066	0	0.01	2.815		NA	NA		NA	NA		0	0	721.426	0	452.745
HCC21b-15	21b	15	BWML	13.1985	-54.7185	-19.63	0.01	0.067	0	0.01	1.78		3024	2		286	1		3.4129	12.0826	13.7194	18.4257	1479.73	8.07984
HCC21b-95	21b	95	DCM	13.1985	-54.7185	-22.8	0.01	0.073	0.012	0.01	1		4446	0		417	0		0	0	2.17796	3.51398	91.0887	3.80857
HCC22-5	22	5	Surface	14.8027	-55.1761	-19.7	0.01	0.089	0.001	0.01	1.86		4174	2		503	2		0.578545	3.05372	66.0383	64.8424	5247.12	41.2762
HCC22-35	22	35	BWML	14.8027	-55.1761	-20.04	0.01	0.076	0	0.01	1.84		1371	0		262	0		4.53075	17.1842	19.16	23.3195	1682.55	9.34236
HCC22-105	22	105	DCM	14.8027	-55.1761	-21.78	0.02	0.084	0.049	0.04	0.9		5253	1		406	1		2.91863	10.337	0.898181	1.7393	53.0014	1.44661
HCC23-5	23	5	Surface	15.786	-57.0533	-19.67	0	0.056	0	0.016	3.94		5737	1		599	1		4.61071	14.9588	32.29	68.3984	3472.62	11.4543
HCC23-11	23	11	BWML	15.786	-57.0533	-19.87	0	0.05	0	0.01	3.9		2403	1		360	1		3.13396	10.3608	19.5015	40.4301	2012.12	8.53342
HCC23-95	23	95	DCM	15.786	-57.0533	-21.59	0.01	0.055	0.074	0.504	1.16		7946	5		554	2		0	5.01234	1.52154	3.10454	80.9791	1.73955
a Seawater layer where the samples were collected. BWML: Bottom Water Mixed Layer, DCM: Deep Chlorophyll Maximum
b Total Organic Carbon
c Photosynthetic picoeukaryotes
d Photosynthetic nanoeukaryotes

## Sheet: Supplementary Table S3
Supplementary Table S3. List of forward primer-associated Multiplex Identifiers (MIDs) used for Ion Torrent sequencing.
Sample ID	MID code	MID sequence	Sequencing run
HCC-12-5	V4F_1	ACGAGTGCGT	I
HCC-1-5	V4F_2	ACGCTCGACA	I
HCC-12-15	V4F_3	AGACGCACTC	I
HCC-20a-15	V4F_4	AGCACTGTAG	I
HCC-20a-65	V4F_5	ATCAGACACG	I
HCC-23-5	V4F_6	ATATCGCGAG	I
HCC-23-11	V4F_7	CGTGTCTCTA	I
HCC-23-95	V4F_8	CTCGCGTGTC	I
HCC-1-40	V4F_9	TAGTATCAGC	I
HCC-1-80	V4F_10	TCTCTATGCG	I
HCC-2-5	V4F_11	TGATACGTCT	I
HCC-20b-5	V4F_1	ACGAGTGCGT	II
HCC-20b-15	V4F_2	ACGCTCGACA	II
HCC-21a-5	V4F_3	AGACGCACTC	II
HCC-21a-15	V4F_4	AGCACTGTAG	II
HCC-21a-95	V4F_5	ATCAGACACG	II
HCC-21b-5	V4F_6	ATATCGCGAG	II
HCC-21b-15	V4F_7	CGTGTCTCTA	II
HCC-20a-5	V4F_8	CTCGCGTGTC	II
HCC-20b-80	V4F_9	TAGTATCAGC	II
HCC-21b-95	V4F_10	TCTCTATGCG	II
HCC-14-5	V4F_11	TGATACGTCT	II
HCC-14-60	V4F_13	TCGATCACGT	II
HCC-14-200	V4F_14	CGAGAGATAC	II
HCC-13-3	V4F_15	ATACGACGTA	II
HCC-13-35	V4F_16	TCACGTACTA	II
HCC-15-5	V4F_17	CGTCTAGTAC	II
HCC-15-11	V4F_18	TCTACGTAGC	II
HCC-15-45	V4F_19	TGTACTACTC	II
HCC-18-5	V4F_20	ACGACTACAG	II
HCC-18-13	V4F_1	ACGAGTGCGT	III
HCC-18-66	V4F_2	ACGCTCGACA	III
HCC-16-5	V4F_3	AGACGCACTC	III
HCC-16-22	V4F_4	AGCACTGTAG	III
HCC-16-77	V4F_5	ATCAGACACG	III
HCC-22-5	V4F_6	ATATCGCGAG	III
HCC-22-35	V4F_7	CGTGTCTCTA	III
HCC-22-105	V4F_8	CTCGCGTGTC	III
HCC-10-5	V4F_9	TAGTATCAGC	III
HCC-10-9	V4F_10	TCTCTATGCG	III
HCC-10-50	V4F_11	TGATACGTCT	III
HCC-10-200	V4F_12	TACTGAGCTA	III
HCC-17-3	V4F_13	TCGATCACGT	III
HCC-17-10	V4F_14	CGAGAGATAC	III
HCC-17-45	V4F_15	ATACGACGTA	III
HCC-2-65	V4F_16	TCACGTACTA	III
HCC-3-5	V4F_17	CGTCTAGTAC	III
HCC-3-35	V4F_18	TCTACGTAGC	III
HCC-3-90	V4F_19	TGTACTACTC	III
HCC-6-5	V4F_20	ACGACTACAG	III
HCC-6-15	V4F_1	ACGAGTGCGT	IV
HCC-6-90	V4F_2	ACGCTCGACA	IV
HCC-7-5	V4F_3	AGACGCACTC	IV
HCC-7-15	V4F_4	AGCACTGTAG	IV
HCC-7-60	V4F_5	ATCAGACACG	IV
HCC-9-5	V4F_6	ATATCGCGAG	IV
HCC-9-40	V4F_7	CGTGTCTCTA	IV
HCC-9-200	V4F_8	CTCGCGTGTC	IV
HCC-0-5	V4F_9	TAGTATCAGC	IV
HCC-0-60	V4F_10	TCTCTATGCG	IV
HCC-11-5	V4F_11	TGATACGTCT	IV
HCC-11-15	V4F_12	TACTGAGCTA	IV
HCC-19-4	V4F_13	TCGATCACGT	IV
HCC-19-12	V4F_14	CGAGAGATAC	IV
HCC-19-60	V4F_15	ATACGACGTA	IV
HCC-4-5	V4F_16	TCACGTACTA	IV
HCC-4-30	V4F_17	CGTCTAGTAC	IV
HCC-4-83	V4F_18	TCTACGTAGC	IV
HCC-5-5	V4F_19	TGTACTACTC	IV
HCC-5-40	V4F_20	ACGACTACAG	IV
HCC-5-80	V4F_1	ACGAGTGCGT	V
HCC-8-10	V4F_2	ACGCTCGACA	V
HCC-8-5	V4F_3	AGACGCACTC	V
HCC-8-52	V4F_4	AGCACTGTAG	V
HCC-2-33	V4F_5	ATCAGACACG	V
HCC-15-5	V4F_6	ATATCGCGAG	V
HCC-12-15	V4F_7	CGTGTCTCTA	V
HCC-23-5	V4F_8	CTCGCGTGTC	V
HCC-1-40	V4F_9	TAGTATCAGC	V
HCC-21a-5	V4F_10	TCTCTATGCG	V
HCC-14-60	V4F_11	TGATACGTCT	V
HCC-18-5	V4F_12	TACTGAGCTA	V
HCC-16-5	V4F_13	TCGATCACGT	V
HCC-22-5	V4F_15	ATACGACGTA	V
HCC-16-77	V4F_16	TCACGTACTA	V
HCC-17-10	V4F_17	CGTCTAGTAC	V
HCC-7-5	V4F_18	TCTACGTAGC	V
HCC-9-5	V4F_19	TGTACTACTC	V
HCC-11-5	V4F_20	ACGACTACAG	V

## Sheet: Supplementary Table S4
Supplementary Table S4. Taxonomic affiliation and distribution of the OTUs (95 % identity) found in the present study within each sample.
#OTU ID	HCC8-10	HCC16-5	HCC7-15	HCC11-15	HCC23-5	HCC20b-15	HCC2-33	HCC4-5	HCC18-5	HCC4-30	HCC19-12	HCC9-5	HCC19-60	HCC7-60	HCC17-10	HCC6-90	HCC8-52	HCC5-80	HCC23-95	HCC20a-65	HCC22-105	HCC16-77	HCC17-45	HCC3-35	HCC15-45	HCC20a-5	HCC10-9	HCC5-40	HCC20b-80	HCC22-5	HCC21a-5	HCC22-35	HCC10-50	HCC2-5	HCC3-5	HCC1-40	HCC17-3	HCC0-60	HCC14-60	HCC23-11	HCC1-80	HCC4-83	HCC21b-15	HCC21b-95	HCC3-90	HCC1-5	HCC18-13	HCC2-65	HCC21a-15
denovo1	0	0	0	0	0	0	0	0	0	0	0	0	0	0	0	1	4	2	2	1	6	1	1	0	0	0	0	0	0	0	0	0	0	0	0	0	0	0	0	0	0	0	0	0	0	0	0	0	0
denovo2	0	0	0	0	0	0	0	0	0	0	0	0	0	0	0	2	0	0	0	0	2	0	0	3	1	1	1	1	0	0	0	0	0	0	0	0	0	0	0	0	0	0	0	0	0	0	0	0	0
denovo3	0	0	0	4	0	0	0	0	0	0	0	0	0	0	0	0	2	0	0	0	5	0	0	1	0	0	0	0	7	0	0	0	0	0	0	0	0	0	0	0	0	0	0	0	0	0	0	0	0
denovo4	3	2	1	0	17	0	4	0	4	1	0	4	1	0	4	1	1	2	0	0	0	1	1	2	0	2	6	1	0	8	1	2	2	2	1	2	2	1	2	2	0	0	0	0	0	0	0	0	0
denovo5	0	0	0	0	0	2	0	0	0	0	0	0	0	0	0	0	0	0	0	0	0	0	0	0	0	0	0	0	0	0	0	0	0	0	0	0	0	0	0	0	0	0	0	0	0	0	0	0	0
denovo6	0	0	0	0	0	0	5	10	0	13	0	1	2	13	0	8	4	10	22	2	0	14	2	7	0	0	10	3	3	2	0	0	0	3	15	8	0	0	3	0	4	6	9	4	7	6	4	12	1
denovo8	1	0	0	0	0	0	0	0	0	0	0	0	0	0	0	0	0	0	0	0	0	0	0	0	0	0	0	0	0	0	0	0	0	0	1	0	0	0	0	0	0	0	0	0	0	0	0	0	0
denovo9	0	0	0	1	1	0	2	4	0	2	0	3	0	2	0	1	1	8	5	1	3	6	0	0	2	0	8	9	1	2	0	0	0	1	5	1	0	0	3	0	2	0	1	0	0	4	0	4	0
denovo10	0	0	0	0	0	0	0	0	0	0	0	0	0	0	0	0	0	0	0	0	0	0	0	0	0	0	0	0	0	0	0	0	1	0	0	0	0	0	0	0	0	0	0	0	0	0	0	0	0
denovo11	0	0	0	2	0	0	0	0	0	0	0	0	0	0	0	0	1	0	0	0	4	0	0	0	0	0	0	0	0	0	0	0	0	0	0	0	0	0	0	0	0	0	0	0	0	0	0	0	0
denovo12	0	0	0	0	0	0	0	0	0	0	0	0	0	0	0	0	0	2	2	0	1	1	0	2	0	0	0	2	0	0	0	1	0	0	0	0	0	0	0	0	0	0	0	0	0	0	0	0	0
denovo13	3	0	0	0	1	0	0	1	2	0	0	9	0	0	3	0	0	0	0	0	0	0	0	0	0	0	0	0	0	0	1	0	0	1	2	0	7	1	0	0	0	1	1	0	0	1	0	0	0
denovo15	0	0	0	0	0	0	0	0	1	1	0	0	1	0	0	1	5	0	2	2	0	0	1	0	0	0	0	0	0	0	0	0	0	0	0	0	0	0	1	0	1	0	0	0	0	0	0	0	0
denovo16	0	0	0	0	10	0	0	17	0	1	0	0	8	3	0	0	0	0	0	0	0	1	3	2	0	0	3	3	0	0	0	0	0	0	1	4	0	0	0	0	0	12	39	0	0	10	7	0	37
denovo17	2	2	0	0	4	0	1	4	2	0	1	2	1	1	0	0	3	0	0	0	0	0	0	1	2	0	0	2	1	7	0	0	0	2	0	1	2	0	0	6	0	3	1	4	0	4	0	1	4
denovo19	0	0	0	0	0	0	0	0	0	0	0	1	0	0	0	0	0	0	0	0	0	0	0	0	0	0	0	0	0	0	0	0	0	0	0	0	0	0	0	0	0	0	0	0	0	0	0	0	0
denovo20	0	0	0	4	0	0	0	0	0	0	0	0	3	0	1	0	0	1	0	0	5	0	0	0	0	0	0	0	0	0	0	0	0	0	0	0	0	0	0	0	0	0	0	0	0	0	0	0	0
denovo21	0	0	0	3	0	0	0	0	0	0	0	0	0	0	0	0	0	0	0	0	0	0	0	0	0	0	0	0	0	0	0	0	0	0	0	0	0	0	0	0	0	0	0	0	0	0	0	0	0
denovo22	0	0	0	9	0	0	0	0	0	0	0	0	0	0	0	0	0	0	0	0	3	0	0	0	0	0	0	0	0	0	0	0	0	0	0	0	0	0	0	0	0	0	0	0	0	0	0	0	0
denovo24	0	0	0	0	1	0	0	0	0	0	0	0	0	0	0	0	0	0	0	0	0	0	0	0	0	0	0	0	0	0	0	0	0	0	0	0	0	0	0	0	0	0	0	0	0	0	0	0	0
denovo25	0	0	0	0	0	0	0	0	0	0	0	0	0	0	0	2	0	0	0	0	0	0	0	0	0	0	0	0	0	0	0	0	0	0	0	0	0	0	0	0	0	0	0	0	0	0	0	0	0
denovo26	0	0	0	0	0	0	0	0	0	0	0	0	0	0	0	0	0	0	0	0	0	0	0	0	0	0	0	0	0	0	0	0	0	0	0	0	0	0	0	0	0	0	0	0	0	0	0	0	0
denovo27	0	0	0	0	0	0	0	0	0	0	0	0	0	0	0	0	0	0	0	0	0	0	0	0	0	0	0	0	0	0	0	0	0	0	0	0	0	0	0	0	0	0	0	0	0	0	0	0	0
denovo28	0	1	0	0	8	0	0	2	1	0	0	2	0	0	0	0	0	0	0	0	0	0	0	1	5	0	0	0	0	2	1	0	0	1	4	0	0	1	0	4	0	0	1	0	2	0	1	3	1
denovo29	0	0	0	0	0	0	0	0	0	0	0	0	0	0	0	0	0	0	0	0	0	0	0	0	0	0	0	0	0	0	0	0	0	0	0	0	0	0	0	0	0	0	0	0	0	0	0	0	0
denovo30	1	0	0	2	3	0	4	0	0	0	0	0	3	2	1	2	1	4	3	1	0	3	1	2	0	0	0	4	0	0	1	1	0	0	1	0	0	0	7	0	1	2	0	1	0	2	1	1	0
denovo32	0	0	0	1	0	0	0	0	0	0	0	0	0	0	0	0	0	1	0	0	2	0	0	2	0	0	0	0	0	0	0	0	0	0	0	0	0	0	0	0	0	0	0	0	0	0	0	0	0
denovo33	0	0	0	0	1	1	0	0	4	0	5	3	0	0	4	0	0	0	0	0	0	0	0	0	0	1	0	0	0	0	0	0	0	0	0	0	0	1	0	2	0	0	0	0	0	1	0	0	0
denovo36	0	0	0	0	0	0	0	0	0	0	0	0	0	3	0	2	9	0	1	2	0	6	1	2	5	0	0	2	4	0	0	19	0	0	0	0	0	0	16	0	0	0	0	3	0	0	0	0	0
denovo37	0	0	2	0	5	3	1	4	2	1	0	1	2	0	0	1	2	0	3	0	0	1	0	0	6	1	0	1	0	0	1	0	0	4	1	1	1	1	1	1	2	2	3	0	2	2	0	0	0
denovo38	0	0	3	0	0	0	0	1	0	1	0	0	0	6	0	1	0	0	1	0	0	1	0	2	0	0	0	1	0	2	0	0	0	1	2	1	0	0	0	0	0	0	0	0	0	0	0	0	0
denovo39	0	0	0	0	0	0	0	0	0	0	0	0	0	0	0	0	0	0	0	0	0	0	0	0	3	0	0	0	0	0	0	0	0	0	0	0	0	0	0	0	0	0	0	0	0	0	0	0	0
denovo40	0	0	0	0	0	0	0	0	0	0	0	0	0	0	0	2	1	1	0	0	0	0	0	1	1	0	0	0	0	0	0	0	0	0	0	0	0	0	2	0	0	0	0	0	0	0	0	0	0
denovo42	0	0	0	0	0	0	0	1	0	2	0	0	6	2	0	8	1	0	2	0	0	7	1	1	1	0	0	1	1	0	0	8	0	0	0	1	0	0	2	1	0	1	0	3	0	0	0	0	0
denovo43	34	3	30	2	26	15	51	60	13	56	377	47	235	79	338	25	21	2	98	12	0	30	13	6	34	52	13	26	21	44	0	17	28	35	69	27	2	14	48	13	26	39	36	42	28	192	69	24	20
denovo44	1	0	0	0	0	0	0	0	0	0	0	0	0	0	0	0	0	0	1	0	0	0	0	0	0	0	0	0	0	0	0	0	0	0	0	0	0	0	0	0	1	0	0	0	0	0	0	0	0
denovo45	9	7	4	0	18	14	6	19	3	4	1	8	0	1	7	1	0	0	3	1	1	1	0	0	2	28	8	3	1	11	11	0	2	4	7	6	3	2	2	11	0	7	9	0	5	5	6	4	7
denovo47	0	0	0	2	0	0	0	0	0	0	0	0	0	0	0	0	0	0	0	0	0	0	0	0	0	0	0	0	0	0	0	0	0	0	0	0	0	0	0	0	0	0	0	0	0	0	0	0	0
denovo48	0	0	0	0	0	0	0	0	0	0	0	0	0	0	0	0	0	1	0	0	0	0	0	0	0	0	0	0	0	0	0	0	0	0	0	0	0	0	0	0	0	0	0	0	0	2	0	0	0
denovo49	0	1	0	0	6	0	3	1	0	0	0	0	13	3	2	3	0	0	0	0	0	0	0	1	0	1	1	0	0	0	0	0	0	0	0	2	1	0	0	0	2	0	0	0	2	0	0	0	0
denovo51	36	2	7	9	37	23	5	11	5	38	13	39	1	10	10	8	17	18	20	8	1	8	2	2	8	7	2	14	9	31	0	2	0	2	9	15	0	1	19	6	4	13	1	12	1	13	2	0	2
denovo53	0	0	0	0	0	0	0	0	0	0	0	0	0	1	0	0	0	1	0	0	0	0	0	0	0	0	1	0	0	1	0	0	0	0	0	0	0	0	0	0	0	0	0	0	0	0	1	0	0
denovo54	0	3	0	0	0	0	0	0	0	0	0	0	0	0	0	0	0	0	0	0	0	0	0	0	0	0	0	0	0	0	0	0	0	0	0	0	0	0	0	0	0	0	0	0	0	0	0	0	0
denovo55	0	1	0	0	0	0	0	3	0	2	0	0	0	0	0	0	0	0	0	0	0	0	0	0	0	0	0	0	0	1	9	0	0	0	2	0	0	0	0	0	0	1	2	0	0	0	2	3	11
denovo56	0	0	0	0	0	0	0	0	0	0	0	0	0	0	0	1	0	0	0	0	0	0	0	0	0	0	0	0	0	0	0	0	0	0	0	0	0	0	1	0	0	0	0	0	0	0	0	0	0
denovo58	0	0	0	0	0	0	0	0	0	1	0	0	0	0	0	0	0	0	0	0	0	0	0	0	0	0	0	0	0	0	0	0	0	0	1	0	0	0	0	0	0	0	0	0	0	0	0	0	0
denovo59	0	0	0	0	0	1	0	0	1	0	5	0	1	0	2	1	0	0	0	0	0	0	0	0	0	1	0	2	0	0	0	1	0	0	1	0	0	0	0	0	0	0	0	0	0	0	0	0	0
denovo60	0	0	0	0	0	0	0	0	0	0	0	0	0	0	0	0	0	0	0	0	0	0	0	0	0	0	0	0	0	0	0	0	0	0	0	0	0	0	0	0	0	0	0	0	0	0	0	0	0
denovo62	0	0	0	0	0	0	0	0	0	0	0	0	0	0	0	0	0	0	0	0	0	0	0	0	0	0	0	0	0	0	0	0	1	0	0	0	0	0	0	0	0	0	0	0	0	0	0	0	0
denovo63	0	0	0	0	0	0	0	0	0	0	0	0	0	0	0	0	0	0	0	0	0	0	0	0	0	0	0	0	0	2	3	0	0	0	0	0	0	0	0	0	0	0	0	0	2	0	0	0	0
denovo65	0	0	0	0	0	0	0	0	0	0	0	0	0	0	0	0	0	0	0	0	0	0	0	0	0	0	0	0	0	0	0	0	0	0	0	0	0	0	0	0	0	0	0	2	0	0	0	0	0
denovo66	0	0	0	0	0	0	0	0	0	0	0	0	0	0	0	0	0	0	0	0	0	0	0	0	0	0	0	0	0	0	0	0	0	0	0	0	0	0	0	0	0	0	0	0	0	0	0	0	0
denovo67	0	0	0	0	0	1	0	0	0	0	0	0	0	0	0	0	0	0	0	0	0	0	0	0	0	0	0	0	0	1	0	0	0	0	0	0	0	0	0	0	0	1	0	0	1	0	0	0	0
denovo68	1	0	0	0	0	0	1	0	0	1	0	2	1	0	0	2	0	0	0	1	0	0	0	0	0	0	0	1	0	0	0	1	0	1	1	2	0	3	0	1	1	0	0	0	0	9	0	0	0
denovo69	0	0	0	0	0	0	0	0	0	0	0	0	0	0	0	0	0	0	0	0	0	0	0	0	0	0	3	0	0	0	0	0	0	0	0	0	0	0	0	0	0	0	0	0	0	0	0	0	0
denovo70	0	0	0	0	0	0	0	0	0	0	0	0	0	0	0	0	0	0	0	0	0	0	2	0	0	0	0	0	0	0	0	0	0	0	0	0	0	0	0	0	0	0	0	0	0	0	0	0	0
denovo71	0	0	0	0	0	0	0	0	0	0	0	0	0	1	0	0	0	0	1	0	0	0	0	0	0	0	0	0	0	0	0	0	0	0	0	0	0	0	0	0	0	0	0	0	0	0	0	0	0
denovo73	0	0	0	0	0	0	0	0	0	0	0	0	0	0	0	0	0	0	0	0	0	0	0	0	0	0	0	0	0	0	0	0	0	0	0	0	0	0	2	0	0	0	0	0	0	0	0	0	0
denovo75	0	0	0	20	0	0	0	1	0	0	0	0	0	0	0	0	0	0	0	0	17	0	0	0	0	0	0	0	0	0	0	0	0	0	0	0	0	0	0	0	0	0	0	0	0	0	0	0	0
denovo76	0	0	0	0	0	0	0	0	0	0	0	0	0	0	0	0	1	0	0	0	0	0	0	0	0	0	0	0	0	0	0	0	0	0	0	0	0	0	0	0	0	0	0	0	0	0	0	0	0
denovo77	0	0	0	0	1	0	1	0	0	0	0	0	0	0	0	0	0	0	0	0	0	0	0	0	0	1	1	0	1	1	0	0	0	0	1	0	0	0	1	0	0	0	0	0	0	0	0	0	0
denovo78	0	0	0	0	0	0	0	0	0	0	0	0	0	0	0	0	0	0	3	0	0	0	0	0	0	0	0	0	0	0	0	0	0	0	0	0	0	0	0	0	0	0	0	1	0	0	0	0	0
denovo79	0	0	0	0	0	0	0	0	0	0	0	0	0	0	0	0	0	1	1	0	0	0	0	0	0	0	0	0	0	0	0	0	0	0	0	0	0	0	0	0	1	0	0	0	0	0	0	0	0
denovo80	0	0	0	0	0	0	0	0	0	0	0	0	0	0	0	0	0	0	0	0	0	0	0	0	0	0	0	0	0	0	0	0	0	0	0	0	0	0	0	0	0	0	0	0	0	0	0	0	0
denovo81	1	0	0	0	2	0	1	1	0	1	4	16	2	1	6	0	2	1	1	0	1	1	1	4	4	6	2	4	4	6	0	0	9	0	0	0	0	9	0	0	3	1	0	5	0	8	2	0	0
denovo82	0	0	0	0	0	0	0	0	0	0	0	0	0	0	0	0	0	0	0	0	0	0	4	0	0	0	2	0	0	0	0	0	0	0	0	1	0	0	0	0	0	0	0	0	0	0	0	0	0
denovo83	0	0	0	1	1	0	0	0	0	9	0	2	1	1	1	0	1	4	4	3	0	3	0	1	3	0	2	2	0	2	0	1	2	0	2	1	0	0	0	0	0	2	0	10	0	4	3	2	0
denovo84	0	0	0	0	0	0	0	0	0	1	0	0	0	0	0	3	0	0	1	0	0	1	0	0	0	0	0	1	5	1	0	0	0	1	0	0	0	0	0	0	0	0	0	0	0	0	0	0	0
denovo85	0	0	0	0	0	0	0	0	0	0	0	0	0	0	0	0	0	0	1	0	0	0	0	0	1	0	0	0	0	0	0	0	0	0	0	0	0	0	0	0	0	0	0	0	0	0	0	0	0
denovo87	0	0	0	4	0	0	0	0	0	0	0	0	0	0	0	0	0	0	2	0	20	0	0	0	0	0	0	2	0	0	0	0	0	0	0	0	0	0	0	0	0	0	0	0	0	0	0	0	0
denovo88	0	0	0	0	0	0	0	0	0	0	0	0	0	0	0	1	0	0	0	0	0	0	0	0	0	0	0	0	0	0	0	0	0	0	0	0	0	0	0	0	0	0	0	0	0	0	0	0	0
denovo89	2	0	0	0	0	1	0	0	0	0	0	1	0	0	0	0	0	1	0	0	0	0	0	0	0	4	0	0	0	0	0	0	0	1	0	0	0	1	0	0	0	0	0	0	0	0	0	0	0
denovo90	0	0	0	0	10	0	0	0	0	0	0	0	0	0	0	0	0	0	0	0	0	0	0	0	0	0	0	0	0	0	0	0	0	11	13	0	0	0	0	0	0	0	0	0	0	0	1	8	0
denovo91	6	0	0	1	0	0	0	1	0	0	1	3	0	0	1	0	0	0	1	0	1	0	1	0	1	3	0	0	0	1	0	0	0	0	1	0	2	0	1	1	0	0	0	0	0	0	0	0	0
denovo93	0	0	0	0	0	0	0	0	0	0	0	0	0	0	0	0	0	0	0	0	0	0	0	0	0	0	0	0	0	0	0	0	0	0	0	0	0	0	0	0	0	0	0	0	0	0	0	0	0
denovo95	0	0	0	0	0	0	0	0	0	1	0	0	0	0	0	0	0	0	0	0	0	0	0	0	0	0	0	0	0	0	0	0	0	0	1	0	0	0	0	0	0	1	0	0	0	0	0	0	0
denovo96	0	0	0	0	0	0	0	0	0	0	0	0	0	0	0	0	0	0	0	0	3	0	0	0	0	0	0	0	0	0	0	0	0	0	0	0	0	0	0	0	0	0	0	0	0	0	0	0	0
denovo98	0	0	0	0	0	0	0	0	0	1	0	0	0	0	0	0	0	0	0	0	0	0	0	0	2	0	0	1	0	0	0	0	0	0	0	0	0	0	0	0	0	0	0	0	0	0	0	0	0
denovo99	0	0	0	0	0	0	0	0	1	2	0	0	0	1	0	0	0	4	0	0	0	0	0	0	0	0	4	2	0	0	0	0	0	0	0	0	0	0	0	0	0	0	0	1	0	0	0	0	0
denovo100	0	0	0	0	0	0	0	0	0	0	0	0	0	0	0	0	0	0	0	0	0	0	0	0	0	2	0	0	0	2	0	0	0	0	0	0	0	0	0	0	0	0	0	1	0	1	0	0	0
denovo101	0	0	5	1	23	1	15	22	1	9	0	5	1	8	1	9	2	8	12	3	0	1	0	1	3	0	5	10	6	24	0	1	0	8	12	4	0	4	0	11	4	12	3	5	1	56	4	2	8
denovo103	0	0	0	0	0	0	0	0	2	0	26	0	8	0	18	0	0	0	0	0	0	0	0	0	0	0	0	0	0	0	0	0	787	0	0	0	0	0	0	1	0	0	0	0	0	0	0	0	0
denovo104	0	0	0	0	0	0	0	0	0	0	0	0	0	0	0	0	0	0	0	1	0	0	0	0	0	0	0	0	0	0	0	0	0	0	0	0	0	0	0	0	0	0	0	0	0	0	0	0	0
denovo106	0	0	0	1	0	0	0	0	0	0	1	1	0	1	1	1	0	2	2	0	3	0	0	2	0	1	0	0	4	0	0	1	0	0	0	0	0	0	2	0	0	0	0	0	0	0	0	0	0
denovo108	1	1	0	0	4	0	2	5	2	0	1	1	2	3	2	1	1	2	0	1	0	1	0	2	1	0	1	0	0	0	0	0	11	0	2	1	2	0	0	0	0	1	0	0	3	2	2	4	0
denovo109	2	0	0	0	2	0	1	3	0	4	0	0	0	0	0	2	2	2	2	1	0	0	0	0	0	0	0	2	0	0	0	0	0	0	1	2	0	0	5	0	1	1	0	0	0	4	0	0	0
denovo110	0	0	0	0	0	0	0	0	0	0	0	0	0	0	0	0	0	0	0	0	0	0	0	1	0	0	0	0	0	0	0	0	0	0	0	0	0	0	0	0	0	0	0	0	0	0	0	0	0
denovo111	0	0	0	0	0	0	0	1	0	0	0	0	0	0	0	0	0	0	0	0	0	0	0	0	0	0	1	0	0	1	0	0	0	0	0	0	0	0	0	0	0	0	0	0	1	0	0	0	0
denovo112	0	0	0	18	0	0	0	0	0	0	0	0	0	0	0	0	0	1	2	0	32	0	0	0	0	0	0	1	0	0	0	0	0	0	0	0	0	0	1	0	0	0	0	0	0	0	0	0	0
denovo113	52	33	34	44	15	6	7	18	46	36	16	234	41	14	43	11	21	26	24	4	5	17	16	19	6	49	16	22	10	18	15	14	18	7	21	22	3	4	63	3	5	21	4	4	4	19	1	8	4
denovo114	0	0	0	0	0	0	0	0	0	1	0	0	0	0	0	0	0	0	0	1	0	0	0	0	0	0	0	0	0	0	0	0	0	0	0	0	0	0	0	0	0	0	0	0	0	0	0	0	0
denovo115	0	0	0	0	2	0	0	0	0	0	0	1	0	0	1	0	0	0	4	0	0	0	0	0	0	0	0	0	0	0	0	0	0	0	0	0	0	0	0	0	0	0	0	0	0	0	0	0	0
denovo116	0	0	0	0	0	0	0	0	0	2	0	0	0	1	0	0	0	9	16	0	0	0	0	1	0	0	1	3	1	0	0	0	0	0	0	0	0	0	1	0	1	0	0	10	0	0	0	0	0
denovo117	1	0	0	7	0	0	0	0	0	4	0	0	1	0	0	0	2	1	5	0	3	0	0	1	0	0	0	1	0	1	0	0	0	0	0	0	0	0	0	0	0	1	0	0	2	0	0	0	0
denovo118	0	0	0	0	0	0	0	0	0	0	0	1	0	0	0	1	2	1	1	0	0	1	1	1	0	0	0	0	1	0	0	1	0	0	0	0	0	0	2	0	0	0	0	0	0	0	0	0	0
denovo119	0	0	0	0	0	0	0	0	0	0	0	0	0	0	0	0	0	0	0	0	2	0	0	0	0	0	0	0	0	0	0	0	0	0	0	0	0	0	0	0	0	0	0	0	0	0	0	0	0
denovo121	0	0	0	0	0	0	0	0	0	0	0	0	0	0	0	0	0	0	0	0	4	0	0	0	0	0	0	0	0	0	0	0	0	0	0	0	0	0	0	0	0	0	0	0	0	0	0	0	0
denovo122	5	0	0	0	0	0	0	0	6	0	0	1	0	0	0	0	0	0	0	0	0	0	2	0	0	1	0	0	0	1	0	0	0	0	0	1	1	0	0	0	0	0	2	0	0	0	0	0	0
denovo123	1	0	0	0	1	0	0	0	0	0	0	1	0	0	1	0	0	0	0	0	0	0	0	0	0	0	0	0	0	0	1	0	0	0	1	0	1	1	0	1	0	0	0	0	5	0	0	0	0
denovo124	0	0	0	0	0	0	0	0	0	0	0	0	0	0	0	0	0	0	0	0	0	0	0	0	0	0	0	0	0	0	0	0	0	0	0	0	0	0	0	0	0	0	0	0	0	0	0	0	0
denovo125	0	0	0	29	0	0	0	0	0	4	0	0	2	0	0	3	0	10	7	1	28	2	0	8	4	1	0	17	5	0	0	2	0	0	0	0	0	0	0	0	1	0	0	11	0	0	0	0	0
denovo126	0	0	0	0	0	0	0	0	0	0	0	0	0	0	0	0	0	0	0	0	0	0	0	0	0	0	0	0	0	0	0	0	0	0	0	0	0	0	4	0	0	0	0	0	0	0	0	0	0
denovo127	0	0	0	0	0	0	0	0	0	0	0	0	0	0	1	0	0	0	0	0	0	0	0	0	0	0	0	0	0	0	0	0	0	0	0	0	0	1	0	0	0	0	0	0	0	0	0	0	0
denovo128	1	0	0	0	0	0	0	0	0	0	0	0	0	0	0	0	0	0	0	0	0	0	0	0	0	0	0	0	0	0	0	0	0	2	0	0	0	0	0	0	0	0	0	0	0	0	0	0	0
denovo131	0	0	0	0	0	0	0	0	0	0	0	0	0	0	0	0	0	0	0	0	0	0	0	0	0	0	0	0	0	0	0	0	0	1	0	0	0	0	0	0	0	0	0	0	0	0	0	0	1
denovo132	0	0	0	0	0	0	0	0	0	0	0	0	0	12	0	0	0	0	0	0	0	1	0	1	3	0	0	1	0	0	0	0	0	0	0	0	0	0	1	0	0	0	0	0	0	0	0	0	0
denovo133	0	0	5	0	0	0	2	0	0	0	0	1	6	1	0	4	2	1	2	0	0	4	0	0	0	0	0	5	0	4	0	0	0	2	1	1	0	0	0	0	0	1	0	4	0	0	1	0	6
denovo134	0	0	0	0	1	0	0	0	0	0	0	0	0	0	0	0	0	0	0	0	0	0	0	0	0	0	0	0	0	0	0	0	0	0	0	0	0	0	0	0	0	0	0	0	0	0	0	0	0
denovo135	0	0	0	0	0	0	0	0	0	1	0	0	0	0	0	0	0	1	0	0	0	0	0	0	0	0	0	0	0	0	0	0	0	0	0	0	0	0	0	0	0	0	0	0	0	0	0	0	0
denovo136	3	71	12	10	0	60	3	12	10	17	5	7	2	1	6	5	3	5	4	0	6	1	0	9	1	10	0	5	18	15	2	0	14	5	0	0	3	0	0	2	0	6	82	7	11	5	8	5	5
denovo138	0	0	1	0	6	0	1	0	0	0	0	0	0	0	0	0	2	0	0	0	0	0	0	0	0	0	0	0	0	3	4	0	0	0	0	0	0	0	1	0	0	0	0	0	1	0	1	0	0
denovo140	1	0	0	0	1	0	0	0	0	0	0	1	1	3	0	2	2	0	1	0	0	0	0	0	0	0	1	0	8	0	0	1	0	0	0	2	0	0	1	1	0	0	0	0	0	0	0	0	0
denovo141	0	0	0	0	0	0	0	0	0	0	0	0	0	0	1	0	0	0	0	0	0	0	0	0	0	0	0	0	0	0	0	0	0	0	0	0	0	0	0	0	0	0	0	0	0	0	0	0	0
denovo142	0	0	0	0	0	0	0	0	0	0	0	0	0	0	0	0	0	0	0	0	0	0	0	0	0	0	0	0	0	0	0	0	0	0	0	0	0	0	0	0	0	0	0	3	0	0	0	0	0
denovo143	0	0	0	2	0	0	0	0	0	0	0	0	0	0	0	0	0	0	0	0	3	0	0	0	0	0	0	0	0	0	0	0	0	0	0	0	0	0	0	0	0	0	0	0	0	0	0	0	0
denovo144	6	1	18	0	6	3	4	8	13	6	5	7	7	16	7	11	2	7	5	2	5	6	4	6	9	11	7	11	2	11	4	0	6	5	16	6	7	4	11	1	5	7	10	5	3	2	5	8	6
denovo147	0	0	0	0	0	0	0	0	0	0	0	0	0	0	0	0	0	1	1	0	0	1	0	0	1	0	0	0	0	0	0	0	0	0	0	0	0	0	0	0	0	0	0	0	0	0	0	0	0
denovo148	0	1	1	0	0	0	0	0	0	0	0	0	0	0	0	0	0	0	0	0	0	0	0	0	0	0	0	0	0	0	0	0	0	0	0	0	1	0	0	0	0	0	0	0	0	0	0	0	0
denovo149	1	0	0	0	1	2	2	1	0	0	0	1	0	0	1	0	0	0	0	0	0	0	0	0	0	0	0	0	0	0	0	0	0	1	5	0	3	0	0	0	0	1	0	0	0	0	4	3	0
denovo151	1	0	0	0	0	0	0	0	0	0	1	0	0	0	0	0	0	1	0	0	0	0	0	0	0	0	0	0	0	0	0	0	0	0	0	0	0	0	0	0	0	0	0	0	0	0	0	0	0
denovo152	0	0	6	0	0	0	0	0	3	0	0	2	2	0	1	0	0	0	0	0	1	0	0	0	1	0	0	0	1	0	0	1	0	0	1	0	0	0	0	0	0	1	0	0	0	0	0	0	0
denovo155	0	0	0	0	0	0	0	0	0	0	0	0	0	0	0	0	0	0	0	0	0	0	0	0	0	0	0	0	0	0	0	0	0	0	0	0	0	0	0	0	0	0	0	0	0	0	0	0	0
denovo156	0	0	0	0	0	0	0	0	0	0	0	1	1	1	2	0	0	0	0	0	0	1	0	0	0	0	0	0	0	0	0	0	0	0	0	0	0	0	0	0	0	0	0	1	0	0	1	0	0
denovo157	0	0	0	0	0	0	0	0	0	0	0	0	0	0	0	0	0	0	0	0	0	0	0	0	0	0	0	0	0	0	0	0	0	0	0	0	0	0	0	0	0	0	0	0	0	0	0	0	0
denovo159	0	0	0	0	0	3	0	0	0	0	0	0	0	0	0	0	0	0	0	0	0	0	0	0	0	0	0	0	2	0	0	0	0	0	0	0	0	0	0	0	0	0	0	0	0	0	0	0	0
denovo160	0	0	0	0	0	0	0	0	0	0	1	0	0	0	0	0	0	0	0	0	0	0	0	0	0	0	0	0	0	0	0	0	0	0	0	0	0	0	0	0	0	0	0	0	0	0	0	0	0
denovo161	0	0	0	0	0	0	0	1	0	0	0	0	0	0	0	0	0	0	0	0	0	0	0	0	0	0	0	0	0	0	0	0	0	0	0	0	0	0	0	0	0	0	0	0	0	0	0	0	0
denovo162	2	0	0	0	2	9	0	2	4	0	4	1	2	0	7	0	0	0	0	0	0	0	0	0	0	21	0	0	0	1	0	0	0	0	0	0	0	0	0	1	0	4	4	0	0	0	0	0	3
denovo163	3	2	0	0	10	0	1	2	2	0	1	6	2	0	2	2	0	0	0	1	0	2	0	0	0	6	1	0	0	5	1	0	0	0	0	0	0	1	2	0	0	3	1	0	2	3	1	1	2
denovo164	0	0	0	0	0	0	0	0	0	0	0	0	0	0	0	0	0	0	0	0	0	0	0	0	0	0	0	0	0	0	0	0	0	0	0	0	0	0	0	0	0	0	0	0	0	0	0	0	0
denovo165	0	0	0	0	0	0	0	0	1	0	0	11	3	0	0	0	0	0	0	0	0	0	0	0	0	0	0	0	0	1	0	0	0	0	0	0	0	1	1	0	0	0	0	0	0	0	0	0	0
denovo166	0	0	3	0	4	2	2	0	0	3	2	1	1	4	11	2	1	1	3	0	0	3	1	1	7	0	0	2	2	1	0	1	0	0	1	0	0	0	6	2	2	3	0	0	0	0	2	0	2
denovo167	0	1	2	0	12	1	2	0	0	0	0	0	2	1	6	3	1	0	3	4	2	5	1	2	8	0	2	1	0	8	1	2	0	0	1	0	4	0	0	1	0	0	0	4	0	3	1	0	0
denovo168	0	0	0	0	0	0	0	0	0	0	0	0	0	0	0	0	0	0	0	0	0	0	0	0	0	0	0	0	0	0	0	0	2	0	0	0	0	0	0	0	0	0	0	0	0	0	0	0	0
denovo169	0	0	0	0	0	0	0	0	0	1	0	0	0	0	0	0	0	0	3	0	0	0	0	0	0	0	0	0	0	0	0	0	0	0	0	0	0	0	0	0	0	0	0	0	0	0	0	0	0
denovo170	0	0	0	4	0	0	0	0	0	0	0	0	0	0	0	0	0	0	0	0	10	0	0	0	0	0	0	0	0	0	0	0	0	0	0	0	0	0	0	0	0	0	0	2	0	0	0	0	0
denovo171	0	0	0	0	0	0	0	0	0	0	0	0	0	0	0	0	0	0	0	0	0	0	0	0	0	0	0	0	0	0	0	0	0	0	0	0	0	0	0	0	0	0	0	0	0	0	0	0	0
denovo172	0	0	0	0	0	0	0	0	0	0	0	0	0	0	0	0	0	0	0	0	0	0	0	0	0	0	0	0	0	0	3	0	0	0	0	0	0	0	0	0	0	0	0	0	1	0	0	0	0
denovo173	0	0	0	0	0	0	0	1	0	0	0	0	0	0	0	0	0	0	0	0	0	0	0	0	0	0	0	1	0	0	0	0	0	0	0	0	0	0	1	0	0	0	0	0	0	1	0	0	0
denovo174	0	0	0	0	0	0	0	0	0	0	0	0	0	0	0	0	0	0	0	0	0	2	0	0	0	0	0	0	0	0	0	0	0	0	0	0	0	0	0	0	0	0	0	0	0	0	0	0	0
denovo175	0	0	2	0	0	0	0	2	0	1	0	0	0	0	2	0	0	1	0	0	0	0	0	0	0	0	0	0	0	0	0	0	2	0	0	0	0	0	0	0	0	0	0	0	0	3	0	0	0
denovo176	0	0	0	5	0	0	0	0	0	0	0	0	0	1	1	0	0	0	0	0	1	1	0	0	0	0	0	0	0	0	0	0	0	0	0	0	0	0	0	0	0	0	0	1	0	0	0	0	0
denovo177	0	0	0	0	0	0	0	0	0	0	0	2	0	0	0	0	0	0	0	0	0	0	0	0	0	0	0	0	0	0	2	0	0	0	0	1	0	0	0	0	0	0	0	0	0	0	0	0	0
denovo179	0	0	0	0	0	0	0	0	0	0	0	0	1	0	0	0	0	0	0	0	0	0	0	0	1	0	0	0	1	0	0	0	0	0	0	0	0	0	0	0	0	0	0	1	0	0	0	0	0
denovo180	0	0	0	0	1	0	2	1	0	0	0	0	0	0	0	0	0	3	6	2	0	0	0	1	0	0	2	3	1	0	0	0	0	0	1	0	0	1	0	0	0	0	0	0	0	3	0	0	0
denovo182	0	0	0	3	0	0	0	0	0	0	0	0	0	0	0	0	0	0	0	0	5	0	0	0	0	0	0	0	0	0	0	0	0	0	0	0	0	0	0	0	0	0	0	0	0	0	0	0	0
denovo183	0	0	3	1	1	1	0	0	0	0	0	2	0	0	0	0	1	0	2	0	0	1	0	0	0	0	0	0	0	1	1	0	0	0	0	0	0	1	2	0	0	0	0	0	0	0	1	0	0
denovo184	0	0	0	0	0	0	0	0	0	0	0	0	0	0	0	0	0	0	0	0	0	0	0	0	0	0	0	0	0	0	0	0	0	0	0	0	0	0	0	0	0	2	0	0	0	0	0	0	0
denovo185	1	0	0	0	0	0	0	0	0	0	0	0	0	0	0	0	0	0	0	0	0	0	0	0	0	0	0	0	0	0	0	0	0	0	0	0	0	0	0	0	0	0	0	0	0	0	0	0	0
denovo187	0	0	0	0	0	0	0	0	0	0	0	0	0	0	0	0	0	0	0	0	0	0	0	0	0	2	0	0	0	0	0	0	0	0	0	0	0	0	0	0	0	0	0	0	0	0	0	0	0
denovo188	0	0	0	0	0	0	0	0	0	0	0	0	0	0	0	0	0	0	0	0	0	0	0	0	0	0	0	0	0	0	0	0	0	0	0	0	0	0	0	0	0	0	1	0	0	0	0	0	2
denovo190	0	0	0	0	0	0	0	0	0	0	0	0	0	0	0	0	0	0	0	0	0	0	0	0	0	0	0	0	0	0	0	0	0	0	0	0	0	0	0	0	0	0	0	0	0	0	0	0	0
denovo191	0	0	0	0	0	0	0	0	0	0	0	0	0	0	0	0	0	0	0	0	0	0	0	0	0	0	0	0	0	0	0	0	0	0	0	0	0	0	0	0	0	0	0	0	0	0	0	0	0
denovo193	0	0	0	0	0	0	0	0	0	0	0	0	0	0	0	0	0	0	0	0	0	0	0	0	0	0	0	0	0	0	0	0	0	0	0	0	0	0	0	0	0	0	0	0	0	0	0	0	0
denovo194	0	0	0	0	0	0	0	0	2	0	0	1	0	0	0	0	0	0	0	0	0	0	0	0	0	0	0	0	0	0	0	0	0	0	0	0	0	0	0	0	0	0	0	0	0	0	0	0	0
denovo196	0	0	0	0	0	0	0	0	0	0	0	0	0	0	0	0	0	1	0	0	0	1	0	1	0	0	0	0	0	0	0	0	0	0	0	0	0	0	1	0	0	0	0	0	0	0	0	0	0
denovo198	0	0	0	5	0	0	0	0	0	0	0	0	7	0	0	0	0	0	0	0	4	0	0	0	0	0	0	0	2	0	0	0	0	0	0	0	0	0	0	0	0	0	0	0	0	0	0	0	0
denovo199	0	0	0	0	0	0	0	0	0	0	0	0	0	0	0	1	0	0	0	0	0	0	1	0	0	0	0	0	0	0	0	0	0	0	0	0	0	0	0	0	0	0	0	0	0	0	0	0	0
denovo200	0	0	12	0	0	1	0	0	1	2	0	0	0	0	0	0	0	0	0	0	0	0	1	0	0	0	1	2	0	0	0	0	0	1	0	1	0	0	0	0	0	2	0	1	0	2	0	0	0
denovo201	0	0	0	0	0	0	0	0	0	0	0	0	0	6	0	0	2	1	0	0	3	2	1	0	0	0	0	1	4	0	0	0	0	0	0	0	0	0	0	0	0	0	0	0	0	0	0	0	0
denovo202	2	0	5	2	6	0	1	2	1	1	0	3	0	1	3	3	0	0	4	0	0	1	0	3	1	2	1	2	3	6	2	0	1	2	1	5	0	0	1	0	0	1	1	0	1	3	2	1	0
denovo204	0	0	0	0	0	0	0	0	0	0	0	0	0	0	0	1	0	0	0	0	0	0	0	0	0	0	0	0	0	0	0	0	0	0	0	0	0	0	1	0	0	2	0	0	0	0	0	0	0
denovo206	0	0	0	0	0	0	0	0	0	3	0	0	1	0	0	0	0	3	1	2	0	0	0	0	3	0	0	26	4	0	0	5	0	0	0	1	0	0	5	0	10	0	0	0	0	0	0	0	0
denovo207	0	0	0	0	0	0	0	0	0	0	0	0	0	0	0	0	0	0	0	0	0	0	0	0	0	0	0	0	0	0	0	0	0	0	0	0	0	0	0	0	0	0	0	0	0	0	0	0	0
denovo208	0	0	0	0	0	0	0	0	0	0	0	0	4	0	0	0	0	0	2	0	0	0	0	1	0	0	0	0	0	0	0	0	0	0	0	0	0	0	0	0	0	0	0	0	0	0	0	0	0
denovo210	0	0	0	0	1	0	0	0	0	0	0	0	0	0	0	0	0	0	0	0	0	0	0	0	0	0	0	0	0	0	0	0	0	0	0	0	1	0	0	0	0	0	0	0	0	0	0	0	0
denovo211	0	0	0	0	0	0	0	0	0	0	0	0	0	4	0	1	3	1	2	0	0	5	0	0	0	0	0	0	0	0	0	2	0	0	3	1	0	0	0	0	1	0	0	6	0	2	0	2	0
denovo212	0	0	0	0	0	0	0	0	0	0	0	0	0	0	0	2	4	1	0	0	0	1	0	0	0	0	0	0	0	0	0	0	0	0	0	0	0	0	0	0	0	0	0	1	0	0	0	0	0
denovo214	0	0	0	0	2	0	0	0	0	0	0	0	0	0	0	0	0	0	0	0	0	0	0	0	0	0	0	0	0	0	0	0	0	0	0	0	0	0	0	0	0	0	0	0	0	0	0	0	0
denovo216	0	0	0	0	0	0	0	0	0	0	0	0	0	0	0	0	0	0	0	0	0	0	0	0	0	0	0	0	0	0	0	0	0	0	0	0	0	0	0	0	0	0	0	5	0	0	0	0	0
denovo217	2	7	5	0	34	17	2	0	21	0	2	13	1	2	9	2	6	1	0	0	0	1	5	0	0	28	0	0	0	52	33	0	0	1	1	1	8	0	5	12	0	0	8	0	16	2	0	0	15
denovo218	0	0	0	2	0	0	0	0	0	0	0	0	0	0	0	0	0	0	0	0	0	0	0	0	0	0	6	0	0	0	0	0	0	0	0	0	0	0	0	0	0	0	0	0	0	0	0	0	0
denovo219	10	0	0	0	0	0	0	0	10	7	0	7	2	1	0	6	4	1	4	1	0	4	0	0	4	4	0	21	2	0	0	1	1	0	0	0	0	0	15	0	5	3	0	3	0	2	0	0	3
denovo220	2	0	0	0	1	0	0	0	0	1	0	2	5	0	0	0	0	0	0	0	0	0	0	0	0	0	0	3	3	2	0	0	0	0	0	0	0	0	1	1	8	0	0	0	0	0	0	0	4
denovo222	0	0	0	0	0	0	0	0	0	0	0	0	0	0	0	0	0	0	2	0	1	0	0	0	0	0	0	0	0	0	0	0	0	0	0	0	0	0	0	0	0	0	0	0	0	0	0	0	0
denovo224	0	1	0	0	0	0	0	0	0	0	0	0	0	0	0	0	0	0	0	0	0	0	0	0	0	0	0	0	0	2	0	0	0	0	1	1	0	0	0	0	0	2	0	0	1	0	0	0	0
denovo225	0	0	0	0	0	0	0	0	0	0	0	0	0	0	0	1	0	0	0	0	0	0	0	0	1	0	0	0	0	0	0	0	0	0	0	0	0	0	0	0	0	0	0	0	0	0	0	0	0
denovo226	0	0	0	0	0	0	0	0	0	0	0	1	0	0	0	0	0	0	0	0	0	0	0	0	0	0	0	0	0	0	0	2	0	0	0	0	0	0	0	2	0	0	0	0	0	1	0	0	0
denovo229	0	0	0	0	0	3	0	0	0	0	0	0	0	0	0	0	1	0	0	0	0	0	0	0	2	3	0	0	7	0	0	0	0	0	0	0	0	0	1	0	0	0	0	0	0	0	0	0	6
denovo230	0	0	0	0	0	0	0	0	0	0	0	0	0	0	0	0	0	0	0	0	0	0	0	0	0	0	0	0	0	0	0	0	0	0	0	0	0	0	0	0	0	0	0	0	0	0	0	0	0
denovo231	0	0	0	0	0	0	0	0	0	0	0	0	0	2	0	0	0	0	0	0	0	1	0	0	0	0	0	1	0	0	0	0	0	0	0	0	0	0	0	0	0	0	0	0	0	0	0	0	0
denovo232	0	0	0	1	0	0	0	0	0	0	0	0	0	0	0	0	0	0	0	0	2	0	0	0	0	0	0	0	0	0	0	0	0	0	0	0	0	0	0	0	0	0	0	0	0	0	0	0	0
denovo233	0	0	0	0	2	0	0	0	0	0	0	0	0	0	0	0	0	0	0	0	0	0	0	0	0	0	0	0	0	0	0	0	0	0	0	0	0	0	0	0	0	0	0	0	0	0	0	0	0
denovo234	0	0	0	0	0	0	0	0	0	0	0	0	0	0	0	0	0	0	0	0	0	0	0	0	0	0	0	0	0	2	0	0	0	0	0	0	0	0	0	0	0	0	0	0	0	0	0	0	0
denovo235	0	0	0	0	0	0	0	0	0	0	0	0	0	0	0	0	0	0	0	0	1	0	0	0	0	0	0	0	0	0	0	0	0	0	2	0	0	0	0	0	0	0	0	0	0	0	0	0	0
denovo236	1	0	1	0	1	0	0	2	0	0	0	6	0	0	0	0	0	1	0	0	0	0	0	0	0	0	1	1	1	4	0	2	2	0	2	0	0	0	1	0	0	0	0	0	0	0	2	0	0
denovo237	0	0	0	0	0	0	0	0	0	0	0	0	0	0	0	0	0	0	0	0	0	0	0	0	1	0	0	0	0	0	0	0	0	0	0	0	0	0	1	0	0	0	0	0	0	0	0	0	0
denovo238	0	0	0	0	0	0	0	0	0	0	0	0	0	0	0	0	0	0	0	0	0	0	0	0	0	0	0	0	0	0	0	0	3	0	0	0	0	0	0	0	0	0	0	0	0	0	0	0	0
denovo239	2	0	0	0	0	1	0	0	2	0	1	0	0	0	0	1	0	0	0	0	0	0	0	0	2	0	0	0	0	1	0	0	0	0	0	0	0	0	0	0	0	0	0	0	0	0	0	0	0
denovo241	0	0	0	1	0	0	0	0	0	0	0	0	0	0	0	0	0	1	0	0	1	0	0	0	0	0	0	0	0	0	0	0	0	0	0	0	0	0	0	0	0	0	0	0	0	0	0	0	0
denovo242	0	0	0	0	0	0	0	0	0	0	0	0	0	1	0	0	0	0	0	0	0	0	0	0	0	0	0	1	0	0	0	0	0	0	0	0	0	0	0	0	0	0	0	1	0	0	0	0	0
denovo243	0	0	0	0	0	0	0	1	0	0	0	0	0	0	0	0	0	0	0	0	0	0	0	0	0	0	0	0	0	0	1	0	0	0	0	0	0	0	0	1	0	0	0	0	1	0	0	0	0
denovo244	1	1	0	0	0	0	2	0	2	0	0	0	0	0	0	0	0	0	0	0	0	0	0	0	0	4	0	0	1	1	0	0	0	0	1	0	0	0	0	1	0	0	0	0	0	1	0	0	3
denovo245	0	0	0	3	0	0	0	0	0	1	0	0	0	0	0	1	0	1	1	0	27	1	0	0	0	0	0	0	1	0	0	0	0	0	1	0	0	0	0	0	0	0	0	0	0	0	0	0	0
denovo246	0	0	0	0	0	0	0	0	0	0	0	0	0	0	0	0	0	0	0	0	0	0	0	0	0	0	0	0	0	0	0	0	0	0	0	0	0	0	0	0	0	0	0	0	0	0	0	0	0
denovo248	0	0	0	0	0	0	0	0	0	0	0	0	0	0	0	0	0	0	0	0	0	0	0	0	0	1	0	0	0	0	0	0	0	0	0	0	0	0	0	0	0	0	0	0	0	0	0	0	0
denovo249	0	0	0	1	1	0	1	1	1	2	0	0	0	32	0	7	6	1	2	0	0	11	11	5	4	0	1	6	0	0	0	0	2	2	1	0	0	0	3	1	1	0	0	0	0	2	1	2	0
denovo253	0	0	0	0	0	0	0	0	0	0	0	0	0	0	0	0	0	0	0	0	0	0	0	0	0	0	0	0	0	0	0	0	0	0	0	0	0	0	0	0	0	0	0	2	0	0	0	0	0
denovo254	16	6	4	0	7	2	2	4	13	4	25	23	14	3	21	16	3	1	1	0	0	3	0	1	10	8	1	1	0	6	2	8	8	3	0	3	6	3	2	0	1	3	9	0	0	4	3	1	6
denovo256	0	0	0	0	0	0	0	0	0	0	0	0	0	0	0	0	0	0	0	0	0	0	0	0	0	0	0	0	0	0	0	0	0	0	0	0	0	0	0	0	0	0	0	0	0	0	0	0	0
denovo258	0	0	0	0	0	0	0	0	0	0	0	0	0	0	0	0	0	0	0	0	0	0	0	0	0	0	0	0	0	0	0	0	0	0	0	1	0	0	0	0	0	0	0	0	0	0	0	0	0
denovo259	0	1	2	1	6	0	0	0	2	0	0	1	2	0	0	1	4	4	2	0	0	0	0	0	0	7	3	4	2	0	3	0	0	2	0	1	2	0	0	0	0	0	1	1	0	6	0	0	1
denovo260	0	0	0	2	0	0	0	0	0	0	0	0	0	2	0	1	4	0	2	0	0	8	0	0	0	0	0	0	0	0	0	0	0	0	0	0	0	0	0	0	0	0	0	0	0	0	0	0	0
denovo261	1	1	0	0	0	0	0	0	0	0	1	1	0	0	0	0	1	0	0	0	3	0	0	0	0	1	0	0	0	2	1	0	0	0	1	1	0	0	0	0	0	0	0	0	0	0	0	0	0
denovo262	185	50	30	11	234	50	47	55	116	57	19	285	113	49	40	59	93	31	132	20	4	33	8	16	38	127	44	50	21	118	94	20	4	13	20	45	22	20	94	45	18	27	59	14	24	97	20	16	59
denovo263	9	1	7	0	15	19	0	0	8	2	5	2	3	8	3	3	0	0	6	0	0	0	1	0	1	43	0	3	1	0	3	0	1	0	1	1	2	1	1	2	0	1	1	6	0	1	0	0	7
denovo264	0	0	19	0	6	0	6	15	0	5	1	3	0	2	4	5	5	9	10	1	0	6	2	4	6	0	0	21	0	3	2	0	2	6	10	14	0	2	4	1	3	16	1	3	1	13	1	5	0
denovo265	0	0	0	0	0	0	0	0	0	0	0	0	0	0	0	0	0	0	0	0	4	0	1	0	0	0	0	0	0	0	0	0	0	0	0	0	0	0	0	0	0	0	0	0	0	0	0	0	0
denovo267	6	3	1	0	1	4	2	6	7	0	7	3	0	0	1	0	0	0	0	0	0	0	0	0	0	3	0	0	0	3	2	0	0	7	1	4	0	3	0	2	0	4	4	0	2	1	3	0	4
denovo268	0	0	2	0	7	0	0	0	0	0	0	1	0	0	0	0	0	0	0	0	0	0	0	0	0	8	0	0	0	1	0	0	0	0	0	0	0	1	0	0	0	1	0	0	4	0	0	1	2
denovo269	4	3	15	0	0	2	1	3	1	3	0	1	2	4	2	1	1	1	3	1	0	0	0	2	0	0	0	2	0	2	0	0	0	1	4	0	0	1	0	2	0	0	4	0	0	1	0	0	3
denovo270	0	0	1	0	1	0	0	5	0	11	2	0	2	5	0	2	3	1	30	0	0	1	2	1	1	0	0	8	0	0	0	0	1	1	3	0	0	0	8	0	9	2	1	0	0	7	3	0	0
denovo271	0	0	0	0	0	0	0	0	0	0	0	0	0	0	0	0	0	0	0	0	0	0	0	0	0	0	0	0	0	1	0	0	1	0	0	0	0	0	0	0	0	0	0	0	0	0	0	0	0
denovo272	0	0	0	0	0	0	0	0	0	0	0	0	0	0	0	0	1	1	1	0	1	0	0	0	0	0	0	0	0	0	0	0	0	0	0	0	0	0	0	0	0	0	0	0	0	0	0	0	0
denovo273	0	0	0	0	0	0	0	0	0	0	0	0	0	0	0	0	0	0	0	0	0	0	0	1	0	0	0	1	0	0	0	0	0	0	0	0	0	0	0	0	0	0	0	0	0	0	0	0	0
denovo276	8	2	5	0	21	0	0	3	11	6	5	5	12	10	0	9	2	0	1	3	0	1	2	0	4	8	0	7	3	4	2	0	1	0	4	1	5	4	2	13	2	1	6	8	2	1	2	4	10
denovo277	0	1	0	0	1	1	0	1	1	0	1	3	1	0	0	0	0	0	0	0	0	2	0	0	2	18	0	0	1	2	0	0	0	0	0	1	0	1	0	1	0	1	0	1	0	0	1	0	0
denovo279	2	0	3	2	1	0	0	3	1	0	0	0	0	1	0	10	2	10	13	0	5	13	0	5	5	0	1	2	3	0	0	1	0	0	2	0	0	0	0	1	1	5	0	2	1	0	0	0	0
denovo280	1	0	0	0	0	5	0	0	1	0	0	0	0	0	0	0	0	0	0	0	0	0	0	0	0	0	0	0	0	0	0	0	0	0	0	0	0	0	0	0	0	0	0	0	0	0	0	0	0
denovo281	0	0	0	0	2	0	0	0	0	0	0	0	0	1	0	0	0	0	1	0	0	0	0	0	1	2	0	0	4	0	0	0	0	0	0	0	0	0	0	0	0	0	0	0	0	0	0	0	0
denovo282	0	0	0	0	0	0	0	0	0	0	0	0	0	2	0	1	0	0	1	0	0	2	1	0	0	0	0	1	1	0	0	0	0	0	0	0	0	0	0	0	0	0	0	1	0	0	0	0	0
denovo283	0	0	0	4	1	0	0	0	2	0	0	0	1	0	0	0	0	0	0	0	0	0	0	0	0	0	0	0	1	0	0	0	0	0	1	0	0	0	0	0	0	0	0	1	0	0	0	0	0
denovo284	17	0	0	0	3	19	1	5	16	20	30	7	5	1	52	2	3	3	7	1	1	3	1	0	0	49	0	11	0	1	0	0	0	2	0	0	0	3	2	1	5	1	0	1	0	3	0	0	4
denovo285	0	0	2	0	2	0	0	0	0	0	0	1	7	3	1	0	1	1	4	0	0	2	1	0	1	5	0	2	1	1	0	0	0	1	0	0	1	0	0	0	0	0	0	0	0	1	0	0	0
denovo286	0	0	0	0	0	0	1	0	0	0	0	0	0	9	0	0	1	1	54	0	0	7	0	1	0	0	0	0	3	2	0	0	0	1	0	0	0	0	2	1	0	0	0	3	0	0	0	0	0
denovo287	0	0	0	1	1	0	0	0	0	0	0	0	0	0	2	0	0	1	0	0	0	0	0	0	1	0	0	1	3	0	0	0	2	0	1	1	0	0	0	1	0	1	0	0	0	0	0	0	0
denovo288	1	1	0	0	0	0	0	0	0	0	0	0	0	0	0	0	0	0	0	0	0	0	0	0	0	0	0	0	0	0	0	0	0	0	0	0	0	0	0	0	0	0	0	0	0	0	0	0	0
denovo289	277	27	74	8	156	173	25	152	92	268	139	226	144	80	141	80	25	60	114	27	16	67	27	42	82	289	97	98	20	117	34	54	508	34	90	92	25	39	97	65	96	79	68	39	26	403	39	47	59
denovo290	0	0	1	0	0	0	0	0	0	0	1	0	0	0	0	0	0	0	0	0	0	0	0	0	0	0	0	0	0	1	0	0	0	0	1	1	0	0	0	0	0	0	0	0	0	0	0	2	0
denovo291	0	0	0	0	0	0	0	0	0	0	0	0	0	0	0	0	0	0	1	0	1	0	0	0	0	0	0	0	0	0	0	0	0	0	0	0	0	0	0	0	0	0	1	0	0	0	0	1	1
denovo292	0	0	0	0	0	0	0	0	0	0	0	0	0	0	0	0	0	4	0	0	0	0	0	0	0	0	0	0	0	0	0	0	0	0	0	0	0	0	0	0	0	0	0	0	0	0	0	0	0
denovo293	0	0	0	0	0	0	0	0	0	0	0	0	1	0	0	1	1	0	0	0	0	0	0	0	0	0	0	0	0	0	0	0	0	0	0	0	0	0	1	0	0	0	0	0	0	0	0	0	0
denovo295	0	0	0	11	0	0	0	0	0	0	0	0	0	0	0	0	0	0	0	0	1	0	0	0	0	0	0	0	0	0	0	0	0	0	0	0	0	0	0	0	0	0	0	0	0	0	0	0	0
denovo296	1	0	1	0	1	0	1	0	0	1	0	0	0	1	2	1	0	1	1	0	0	0	1	0	0	0	3	2	0	0	1	1	0	0	1	3	0	0	10	0	0	1	0	0	1	1	1	1	0
denovo297	0	0	0	0	2	0	0	1	0	0	0	0	0	0	0	0	0	0	0	0	0	0	0	0	0	0	0	0	0	1	3	0	0	0	0	0	0	1	0	0	0	0	0	0	0	0	0	0	0
denovo298	0	0	0	0	0	0	0	0	0	0	0	0	0	0	0	0	1	3	0	0	0	0	0	2	0	0	0	0	0	0	0	0	0	0	0	0	0	0	0	0	0	0	0	0	0	0	0	0	0
denovo299	0	0	0	5	0	0	0	0	0	0	0	0	0	0	0	0	0	6	0	0	0	0	0	2	0	0	0	1	0	0	0	0	0	0	0	0	0	0	0	0	0	0	0	0	0	0	0	0	0
denovo300	0	0	0	0	0	0	0	0	0	0	0	0	0	0	0	0	0	0	0	0	0	0	0	0	0	0	0	0	0	0	0	1	0	0	0	0	0	0	0	0	0	0	0	0	0	0	0	0	0
denovo302	0	0	0	0	0	0	0	0	0	0	0	0	1	0	0	8	0	0	0	0	0	0	0	0	0	0	0	1	0	0	0	0	0	0	0	0	0	0	1	0	0	0	0	1	0	0	0	0	0
denovo303	0	0	0	0	0	0	0	0	0	0	0	0	0	0	0	0	0	0	0	0	0	0	0	0	0	0	0	0	0	0	0	0	0	0	0	0	0	0	0	0	0	0	0	0	0	0	0	1	0
denovo304	0	0	0	0	0	0	0	0	0	0	0	0	0	0	2	0	0	0	0	0	0	0	0	0	0	0	0	0	0	0	0	0	0	0	0	0	0	0	0	0	0	0	0	0	0	0	0	0	0
denovo305	0	0	0	0	0	0	0	0	0	0	0	0	0	11	0	0	0	0	1	0	0	2	0	0	1	0	0	0	0	0	0	0	0	0	0	0	0	0	2	0	0	0	0	0	0	0	0	0	0
denovo306	0	0	0	0	0	0	0	0	0	0	0	0	0	0	0	0	0	0	0	0	0	0	0	0	0	0	0	0	0	0	0	0	3	0	0	0	0	0	0	0	0	0	0	0	0	0	0	0	0
denovo307	0	0	0	0	0	0	0	0	0	0	0	0	0	0	0	0	0	0	0	0	0	0	0	0	0	0	0	0	0	0	0	0	0	0	0	1	0	0	0	0	0	1	0	0	0	0	0	0	0
denovo308	0	0	0	0	2	0	0	0	0	1	0	0	0	0	0	0	0	0	0	0	0	0	0	0	0	0	0	0	0	1	0	0	0	0	0	0	0	0	0	0	0	0	0	0	1	0	0	2	0
denovo309	0	0	0	0	0	0	0	0	0	0	0	0	0	0	0	0	0	0	0	0	0	0	0	0	0	0	0	0	0	0	0	0	0	0	0	0	0	0	1	0	0	0	0	0	0	0	0	0	0
denovo312	0	0	0	0	0	0	0	0	0	0	0	0	0	0	0	1	0	0	0	0	0	0	0	0	0	0	0	0	0	0	0	0	0	0	0	0	0	0	1	0	0	0	0	0	0	0	0	0	0
denovo313	15	8	7	1	115	14	18	5	32	1	3	21	1	2	8	11	8	3	15	2	0	3	5	2	5	27	6	6	1	42	29	0	1	6	5	10	15	2	6	12	8	5	2	4	6	24	6	7	15
denovo314	0	0	0	6	1	0	0	5	0	0	0	2	19	4	1	13	0	0	8	0	9	1	1	2	2	1	0	4	5	3	0	5	0	0	4	0	0	0	4	0	1	4	1	2	0	0	0	1	0
denovo315	0	0	0	1	0	0	0	0	0	0	1	3	2	0	0	0	0	0	0	0	0	0	0	0	1	0	0	0	0	0	0	0	2	0	0	0	0	0	0	0	0	0	0	0	0	0	0	0	0
denovo316	0	0	0	1	0	0	0	0	0	0	0	0	0	0	0	0	0	0	0	0	4	0	0	0	0	0	0	0	0	0	0	0	0	0	0	0	0	0	0	0	0	0	0	0	0	0	0	0	0
denovo317	0	0	0	0	1	1	0	0	1	5	1	0	0	2	1	5	1	0	0	0	0	2	3	2	3	0	0	1	0	2	2	0	1	0	2	0	2	0	1	0	0	0	1	0	3	0	0	1	4
denovo318	0	0	1	0	0	0	1	0	1	0	0	1	1	0	0	1	2	0	0	0	0	0	1	0	0	1	0	0	0	0	0	0	0	0	0	1	1	0	0	1	0	0	0	0	0	0	0	0	0
denovo319	0	0	0	0	0	0	0	0	0	0	1	0	2	0	0	0	0	0	0	0	0	0	0	0	0	0	0	0	0	0	0	0	0	0	0	0	0	0	0	0	0	0	0	0	0	0	0	0	0
denovo321	2	0	0	0	3	1	0	1	0	0	1	0	0	6	0	0	0	0	0	0	0	0	0	0	0	0	0	0	0	4	0	0	0	0	3	0	0	0	0	4	1	1	0	0	2	0	2	1	0
denovo325	0	0	0	0	0	0	0	0	0	0	0	0	0	0	0	0	0	0	0	0	0	0	1	0	0	0	0	0	0	1	0	0	0	0	0	0	0	0	0	0	0	0	0	0	0	0	0	1	0
denovo326	0	0	0	0	2	0	0	2	0	0	0	2	4	1	2	1	2	0	3	1	0	0	0	0	1	14	1	0	1	0	0	0	0	0	0	0	0	0	4	0	0	0	0	3	0	0	0	0	0
denovo327	0	0	0	0	0	0	0	0	0	0	0	0	0	0	0	0	0	0	0	0	2	1	0	0	0	0	0	0	0	0	0	0	0	0	0	0	0	0	0	0	0	0	0	0	0	0	0	0	0
denovo328	0	0	1	0	0	0	0	0	0	0	0	0	0	2	0	0	0	0	0	0	0	0	0	0	0	0	0	0	0	0	0	0	0	0	0	0	0	0	0	0	0	0	0	0	0	0	0	0	0
denovo329	0	0	0	0	0	0	0	0	0	0	0	1	0	0	0	0	0	0	0	0	0	0	0	0	0	0	0	0	0	1	0	0	0	0	0	0	0	0	0	0	0	0	0	0	0	0	0	0	0
denovo330	0	0	0	0	2	0	4	4	0	0	0	0	0	0	0	0	0	1	0	1	0	0	0	0	1	4	0	3	0	3	0	0	57	4	4	1	2	0	0	0	0	2	3	0	27	11	1	2	1
denovo332	0	0	0	0	0	0	0	0	0	0	0	0	0	0	0	0	1	0	1	0	0	0	0	0	0	0	0	0	0	0	0	0	0	0	0	0	0	0	0	0	0	0	0	0	0	0	0	0	0
denovo334	0	0	0	0	1	0	0	0	0	0	0	0	0	0	0	0	0	0	0	0	0	0	0	0	0	0	0	0	0	2	0	0	0	0	0	0	0	0	0	0	0	1	0	0	0	0	0	0	0
denovo335	1	0	0	0	1	0	0	0	0	0	0	0	0	0	0	0	0	0	0	0	0	0	0	0	0	0	0	0	0	0	0	0	0	0	0	0	0	0	0	1	0	0	0	0	0	0	0	0	0
denovo336	7	5	8	2	23	3	10	4	15	4	2	7	5	7	9	3	5	8	13	2	6	13	4	4	0	2	7	7	1	29	7	5	14	5	19	16	9	0	8	8	1	0	5	3	22	19	16	22	3
denovo338	0	0	0	0	0	0	0	0	0	0	0	0	0	0	0	0	0	0	0	0	0	1	0	0	1	0	0	0	0	0	0	0	1	0	0	0	0	0	1	0	0	0	0	0	0	0	0	0	0
denovo339	0	0	0	0	0	0	0	0	0	0	0	0	0	0	0	0	0	0	0	0	0	0	0	0	0	0	0	0	0	0	0	0	0	0	0	0	2	0	0	0	0	0	0	0	0	0	0	0	0
denovo341	13	0	2	0	4	1	0	0	12	0	0	1	1	1	4	0	0	0	1	0	0	0	0	0	0	16	0	0	0	0	0	0	0	0	0	0	7	0	1	5	0	0	1	0	0	0	0	0	4
denovo343	0	0	0	0	1	0	0	1	0	0	0	0	1	1	0	4	12	0	0	2	0	2	1	1	10	0	0	4	0	0	0	8	0	0	0	0	0	0	1	0	0	1	0	0	0	0	0	0	0
denovo344	0	0	0	0	0	0	0	0	0	0	0	0	0	0	0	0	0	6	0	0	0	0	0	1	0	0	0	0	0	0	0	0	0	0	0	0	0	0	0	0	0	0	0	0	0	0	0	0	0
denovo345	0	0	0	0	2	0	0	0	0	0	0	0	0	0	0	0	0	0	0	0	0	0	0	0	0	0	0	0	0	0	0	0	0	0	0	0	0	0	0	0	0	0	0	0	0	0	0	0	0
denovo347	0	0	0	0	0	0	0	0	0	0	0	0	0	0	0	0	1	0	0	0	0	0	0	1	1	0	1	0	0	0	0	1	0	0	0	0	0	0	4	0	0	1	0	0	0	0	0	0	0
denovo350	0	0	0	0	0	0	0	0	0	0	0	0	0	0	0	0	0	0	0	0	0	0	0	0	0	0	0	0	0	0	0	0	0	0	0	0	0	0	0	0	0	0	0	0	0	0	0	0	0
denovo351	0	0	0	0	0	0	0	0	0	0	0	0	0	0	0	0	0	0	0	0	0	0	0	0	0	0	0	0	0	0	0	0	0	0	0	0	0	0	0	0	0	0	0	0	0	0	0	0	0
denovo352	0	0	0	0	0	0	1	0	0	0	0	0	0	0	0	0	0	0	0	0	0	0	0	0	0	0	0	0	0	3	1	1	0	1	0	0	0	0	0	0	0	0	0	0	0	1	1	0	0
denovo353	0	0	0	0	0	0	0	0	0	0	0	0	0	0	0	0	0	0	0	0	2	0	0	0	0	0	0	0	0	0	0	0	0	0	0	0	0	0	0	0	0	0	0	0	0	0	0	0	0
denovo355	0	0	0	0	0	0	0	0	0	0	0	0	0	0	0	0	0	0	0	0	0	0	0	0	0	0	2	0	0	0	0	0	0	0	0	0	0	0	0	0	0	0	0	0	0	0	0	0	0
denovo356	0	0	0	0	0	0	0	0	0	1	0	0	0	0	0	0	0	0	0	0	0	0	0	0	0	0	0	0	0	0	0	0	0	0	0	0	0	0	0	0	0	0	0	0	0	0	0	1	0
denovo357	0	0	0	12	0	0	0	0	0	0	0	0	0	0	0	0	0	1	2	0	1	0	0	0	0	0	0	0	0	0	0	0	0	0	0	0	0	0	1	0	0	0	0	0	0	0	0	0	0
denovo358	0	0	0	0	0	0	0	0	0	0	0	0	0	0	0	5	6	1	1	1	0	1	0	4	0	0	0	0	4	0	0	0	0	0	0	0	0	0	0	0	0	0	0	0	0	0	0	0	0
denovo360	0	0	0	0	0	0	0	0	0	0	0	0	0	0	0	0	0	0	0	0	1	0	0	0	0	0	0	0	0	0	0	0	0	0	0	0	0	0	0	0	0	0	0	0	0	0	0	0	0
denovo361	0	1	0	0	6	0	1	1	4	0	2	1	0	0	4	0	0	0	0	0	0	0	1	0	0	0	6	0	0	5	2	0	1	1	2	3	0	1	1	4	0	0	1	0	3	1	1	1	0
denovo362	0	0	0	0	0	0	0	0	1	0	0	0	1	0	1	0	0	0	0	0	0	0	0	0	0	2	2	0	0	1	0	0	0	0	0	0	0	0	0	0	1	0	0	0	0	0	0	0	0
denovo363	0	0	0	2	0	0	0	0	0	0	0	0	0	0	0	0	0	5	0	0	1	4	0	0	0	0	0	0	0	0	0	0	0	0	0	0	0	0	0	0	0	0	0	0	0	0	0	0	0
denovo365	0	1	0	0	1	0	0	0	0	0	0	0	0	0	1	0	0	0	0	0	0	0	0	0	0	0	0	0	0	0	0	0	0	0	0	0	0	1	0	0	0	0	0	0	0	0	0	0	0
denovo366	1	0	0	0	2	0	0	0	0	0	0	0	0	0	0	0	0	0	0	0	0	0	0	0	0	0	0	0	0	0	0	0	0	0	0	0	0	0	0	0	0	0	0	0	0	0	0	0	0
denovo367	0	0	0	0	0	0	0	0	0	0	0	0	0	0	0	0	0	0	0	0	1	0	0	1	0	0	0	0	0	0	0	0	0	0	0	0	0	0	0	0	0	0	0	0	0	0	0	0	0
denovo368	14	2	2	2	14	47	8	15	25	2	2	13	0	6	2	6	3	2	9	1	1	2	3	1	1	183	0	4	5	19	9	4	0	5	4	1	4	21	3	16	3	3	4	3	2	26	2	3	8
denovo369	0	0	0	1	0	0	0	0	0	0	0	0	0	0	0	0	0	0	0	0	0	0	0	0	0	0	0	0	0	0	0	0	0	0	0	0	0	0	0	0	0	0	0	0	0	0	0	0	0
denovo371	0	0	0	0	0	0	2	0	0	0	0	0	0	0	0	0	0	0	0	0	0	0	1	0	2	0	0	0	0	0	0	0	0	0	4	1	0	0	7	0	0	0	0	0	0	0	0	0	0
denovo372	0	0	0	0	0	0	0	0	0	0	0	0	0	1	0	0	0	1	1	0	0	0	0	0	1	0	0	1	0	0	0	0	0	0	0	0	0	0	0	0	0	0	0	2	0	0	0	0	0
denovo373	0	0	0	0	0	0	0	0	0	1	0	0	0	0	0	0	0	0	0	0	0	0	0	0	0	0	0	0	0	0	0	0	0	0	0	0	0	0	0	0	0	0	0	0	0	0	0	0	0
denovo375	0	0	0	0	0	0	0	0	0	0	0	0	0	1	0	0	0	0	0	0	0	1	0	0	0	0	0	0	0	0	0	0	0	0	0	0	0	0	1	0	0	0	0	0	0	0	0	0	0
denovo377	1	1	1	4	3	2	1	1	0	0	0	0	0	0	1	0	0	4	1	0	0	1	0	1	2	1	3	2	0	1	0	0	0	0	0	5	0	1	1	0	1	0	0	5	0	1	0	1	0
denovo378	0	0	0	0	0	0	0	0	0	1	0	0	0	0	0	0	0	1	0	0	0	0	0	0	0	0	0	0	0	0	0	0	0	0	0	0	0	0	0	0	0	0	0	0	0	0	0	0	0
denovo379	0	0	0	0	0	0	0	0	0	0	0	0	0	0	0	0	0	0	0	0	2	0	0	0	0	0	0	0	0	0	0	0	0	0	0	0	0	0	0	0	0	0	0	0	0	0	0	0	0
denovo381	0	0	0	0	1	0	0	0	0	1	0	0	0	0	0	0	0	0	0	0	0	0	0	0	0	0	0	0	0	0	0	0	0	0	0	0	0	0	0	0	0	0	0	0	0	0	0	0	0
denovo382	0	0	0	0	1	0	1	2	0	0	0	0	0	0	0	0	0	0	0	0	0	0	0	0	1	0	1	0	0	0	1	0	0	0	0	0	0	0	0	0	0	0	0	0	1	0	1	0	0
denovo383	0	0	0	0	0	0	0	0	0	0	0	0	0	0	0	0	0	0	0	0	0	0	0	0	0	0	0	0	0	0	0	0	0	0	0	0	0	0	0	0	0	0	0	0	0	3	0	0	0
denovo385	0	0	0	10	0	0	0	0	0	1	0	0	1	0	0	2	1	8	4	1	2	0	1	1	1	0	0	2	0	0	0	0	0	0	3	4	0	0	0	0	1	1	0	1	0	1	2	0	0
denovo386	3	1	0	0	0	0	0	0	1	0	0	0	0	0	0	0	0	0	0	0	0	0	0	0	0	0	0	0	0	0	0	0	0	0	0	0	0	0	0	0	0	0	0	0	0	0	0	0	0
denovo388	0	0	0	0	0	0	0	0	0	0	0	1	0	0	0	0	0	0	0	0	0	0	0	0	0	0	0	0	0	0	1	0	0	0	0	0	0	0	0	0	0	0	1	0	0	0	0	0	0
denovo389	0	0	0	0	0	0	0	0	0	0	0	0	0	0	0	1	1	0	4	0	0	1	1	0	0	0	0	0	0	0	0	0	0	0	0	0	0	0	0	0	0	0	0	0	0	0	0	0	0
denovo390	0	0	0	23	0	0	0	0	0	0	0	0	0	0	0	0	1	0	0	0	2	0	0	0	3	0	0	2	0	0	0	0	0	0	0	0	0	0	0	0	0	0	0	0	0	0	0	0	0
denovo391	1	0	1	1	1	0	0	1	0	1	0	1	0	1	0	3	0	3	4	0	3	1	1	0	1	0	0	0	0	1	0	0	0	0	1	0	0	0	0	3	0	1	1	5	0	0	2	0	1
denovo392	0	0	0	4	0	0	0	0	0	0	0	0	1	0	0	1	0	0	0	0	2	1	0	0	0	0	0	0	0	0	1	0	0	0	0	0	0	0	0	0	0	0	0	3	0	0	0	0	0
denovo393	0	0	0	0	0	0	0	0	0	0	1	0	0	0	0	0	0	0	0	0	0	0	0	0	0	0	0	0	0	0	0	0	0	0	0	0	0	0	0	0	0	0	0	0	0	0	0	0	0
denovo394	1	0	3	0	24	7	2	5	3	0	0	1	1	1	2	1	5	0	1	1	0	0	0	0	1	5	0	1	0	9	0	0	0	0	2	2	0	0	1	3	0	0	2	0	0	0	1	0	4
denovo395	0	0	0	0	0	0	0	0	0	0	0	0	0	0	0	0	0	0	0	0	0	0	0	2	0	0	0	0	0	0	0	0	0	0	0	0	0	0	0	0	0	0	0	0	0	0	0	0	0
denovo396	0	0	0	0	0	0	0	0	0	0	0	0	0	0	0	0	0	1	2	0	7	0	0	0	0	0	0	0	0	0	0	0	0	0	0	0	0	0	0	0	0	0	0	0	0	0	0	0	0
denovo397	0	0	0	0	0	0	0	0	0	0	0	0	0	0	0	0	0	0	0	0	0	0	0	0	0	1	0	0	0	0	0	0	0	0	0	0	0	0	0	0	0	0	0	0	0	0	0	0	0
denovo398	0	0	0	3	0	0	0	0	0	0	0	0	0	0	0	0	0	0	0	0	0	0	0	0	0	0	0	0	0	0	0	0	0	0	0	0	0	0	0	0	0	0	0	0	0	0	0	0	0
denovo399	25	10	7	1	15	6	3	6	68	2	9	5	6	2	17	5	0	0	1	0	0	1	2	0	1	33	0	0	0	6	1	0	4	1	6	3	2	9	1	4	0	6	2	1	3	5	2	3	5
denovo400	2	0	1	0	3	0	3	2	2	0	1	4	1	0	2	0	0	0	0	0	0	0	0	0	0	11	1	0	0	6	1	0	1	0	2	0	2	0	0	1	0	0	0	0	1	8	2	0	1
denovo401	0	0	1	0	0	0	2	0	0	11	0	0	9	2	2	15	9	3	0	5	0	0	0	1	0	0	2	5	2	0	0	0	0	4	0	2	0	0	1	0	1	1	0	0	0	1	0	0	0
denovo402	16	30	18	0	6	3	3	6	16	2	0	5	3	4	7	1	1	6	2	1	0	1	2	1	0	4	0	5	0	10	4	0	1	5	5	3	10	4	1	1	4	1	8	1	0	5	4	2	2
denovo403	4	1	0	1	5	3	7	7	0	0	0	5	0	1	7	3	0	0	5	0	0	0	0	1	6	0	0	3	3	3	13	1	0	3	3	0	0	2	0	0	1	10	3	3	1	13	0	0	2
denovo404	1	0	0	0	1	1	0	0	0	0	0	0	0	0	0	1	0	4	19	0	0	2	0	1	0	0	0	3	4	0	0	0	0	0	0	0	1	0	143	0	0	0	0	19	0	1	0	0	3
denovo405	0	0	0	0	2	0	0	2	1	0	0	0	0	0	0	0	0	0	0	0	0	0	0	0	0	0	0	0	0	1	1	0	0	0	1	0	0	0	0	1	0	0	0	0	2	0	1	0	0
denovo406	0	0	0	8	0	0	0	0	0	0	0	0	0	0	0	0	0	0	0	0	4	0	0	0	0	0	0	0	0	0	0	0	0	0	0	0	0	0	0	0	0	0	0	0	0	0	0	0	0
denovo408	0	0	0	0	0	0	0	0	0	0	0	0	0	0	0	0	0	0	0	0	0	0	0	0	0	0	0	0	0	0	0	0	0	0	0	0	0	0	0	0	0	0	0	0	0	0	0	0	0
denovo409	0	0	0	0	0	0	0	0	0	2	0	0	0	3	0	2	0	0	0	0	0	0	0	2	0	0	0	2	0	0	0	0	0	0	0	0	0	0	2	0	0	2	0	0	0	0	1	0	0
denovo411	0	0	1	0	0	0	0	0	0	0	0	0	0	0	0	0	0	1	0	0	0	0	0	0	0	0	0	0	0	0	0	0	0	0	1	0	1	0	0	1	0	0	0	0	0	0	0	0	0
denovo412	0	0	0	0	0	0	0	0	0	0	0	0	0	0	0	0	0	0	0	0	3	0	0	0	0	0	0	0	0	0	0	0	0	0	0	0	0	0	0	0	0	0	0	0	0	0	0	0	0
denovo413	0	0	0	0	0	0	0	0	0	1	0	0	0	0	0	1	2	0	1	0	0	0	0	1	0	0	2	3	0	0	0	7	0	0	0	0	0	0	2	0	1	0	0	0	0	0	0	0	0
denovo414	0	0	0	0	0	0	0	0	0	4	0	0	2	3	0	3	1	3	11	1	0	2	1	1	17	0	0	2	0	0	0	2	0	0	1	2	0	0	5	0	6	1	0	6	0	0	0	0	0
denovo417	0	0	0	2	0	0	0	0	0	0	0	0	0	0	0	0	0	0	0	0	1	1	0	0	0	0	0	0	0	0	0	0	0	0	0	0	0	0	0	0	0	0	0	0	0	0	0	0	0
denovo418	0	0	0	0	0	0	0	0	0	0	0	0	0	0	0	0	0	0	0	0	0	0	0	0	0	0	0	0	0	0	0	0	0	0	0	0	0	0	1	0	0	0	0	0	0	0	0	0	0
denovo419	0	0	0	0	0	0	0	0	0	0	0	0	0	0	0	0	0	2	0	0	0	0	0	0	0	0	0	0	0	0	0	0	0	0	0	0	0	0	0	0	0	0	0	0	0	0	0	0	0
denovo420	0	0	0	0	0	0	0	5	0	11	0	6	1	3	3	5	0	7	4	0	0	0	2	1	7	0	0	2	1	0	0	2	15	0	0	0	0	3	19	0	3	10	0	2	0	4	2	2	0
denovo421	0	0	1	0	0	0	1	0	0	3	0	1	1	0	2	0	1	2	0	0	0	0	0	0	3	0	0	2	2	0	0	1	0	1	0	1	0	1	4	0	0	3	0	0	0	0	0	0	0
denovo424	0	0	0	0	0	0	0	0	0	0	0	2	0	0	0	0	0	0	1	0	0	0	0	0	0	0	0	0	0	0	0	0	0	0	0	0	0	0	0	0	0	0	0	0	0	0	0	0	0
denovo426	0	0	0	0	1	1	0	1	0	0	0	2	0	0	0	0	0	1	0	0	0	0	0	0	0	0	0	0	0	1	0	0	0	1	1	1	1	0	0	1	0	0	0	0	1	1	0	0	1
denovo427	0	0	0	0	0	0	0	0	0	0	0	0	0	0	0	0	0	0	0	0	0	0	0	1	0	0	0	0	0	0	0	0	0	0	0	0	0	0	0	0	0	0	0	0	0	0	0	0	0
denovo429	0	0	0	0	0	0	0	0	0	0	0	0	0	0	0	1	0	0	0	0	0	0	0	0	0	0	0	0	0	0	0	0	0	0	0	0	0	1	0	0	0	0	0	0	0	0	0	0	0
denovo430	0	0	0	0	0	0	0	0	0	0	0	0	0	0	0	0	0	0	0	0	0	0	0	0	0	0	0	0	0	0	0	0	0	0	0	0	0	0	0	0	0	0	0	0	0	0	0	0	0
denovo431	0	0	0	0	0	0	0	0	0	0	0	0	0	0	0	0	0	0	0	0	0	0	0	0	0	0	0	0	0	0	0	0	0	0	0	0	0	0	0	0	0	0	1	0	0	0	0	0	0
denovo433	0	0	0	0	0	0	0	0	0	0	0	0	0	0	0	0	0	3	0	0	0	0	0	0	0	0	0	0	0	0	0	0	0	0	0	0	0	0	0	0	0	0	0	0	0	0	0	0	0
denovo434	15	3	27	0	19	1	17	46	3	40	4	2	11	42	13	9	4	44	7	7	1	24	1	16	6	3	16	19	2	18	10	5	7	21	44	12	2	2	28	3	8	31	12	21	9	22	17	15	4
denovo437	2	1	0	0	1	0	0	0	3	0	0	0	1	0	0	0	0	1	0	0	0	0	0	0	0	0	0	0	0	0	0	0	0	0	1	0	0	0	2	0	0	0	0	0	0	0	0	1	0
denovo438	3	0	0	0	0	0	1	0	0	0	0	0	0	0	1	0	0	0	0	0	0	0	0	0	0	0	0	0	0	0	1	0	0	0	2	1	1	0	0	0	0	0	0	0	0	0	0	0	0
denovo439	0	0	0	0	0	1	0	0	0	0	0	0	0	0	0	1	0	0	0	0	0	0	0	0	0	0	0	0	0	0	0	0	0	0	0	0	0	0	0	0	0	0	0	0	0	0	0	0	0
denovo440	0	0	0	2	0	0	0	0	0	0	0	0	0	0	0	0	0	1	0	0	1	0	0	0	0	0	0	0	0	0	0	0	0	0	0	0	0	0	0	0	0	0	0	0	0	0	0	0	0
denovo442	0	1	0	0	0	2	0	0	0	0	0	0	0	0	0	0	0	0	0	0	0	0	0	0	0	0	0	0	0	0	0	0	0	0	0	0	0	0	0	0	0	0	0	0	0	0	0	0	0
denovo443	0	0	0	0	0	0	0	0	0	0	0	0	0	0	0	0	0	0	0	0	2	0	0	0	0	0	0	0	0	0	0	0	0	0	0	0	0	0	0	0	0	0	0	0	0	0	0	0	0
denovo444	0	0	0	12	0	0	0	0	0	0	0	0	0	0	0	0	0	0	0	0	0	0	0	0	0	0	0	0	0	0	1	0	0	0	0	0	0	0	0	0	0	0	0	0	0	0	0	0	0
denovo445	0	0	0	0	1	0	1	0	0	2	0	0	5	2	0	1	0	0	3	4	3	0	0	2	2	2	1	2	4	0	0	1	1	0	3	0	0	0	3	0	0	0	0	6	0	0	0	0	0
denovo447	1	1	0	0	0	2	0	1	0	0	3	0	3	1	4	0	0	0	0	0	2	1	0	2	0	0	1	1	0	1	0	0	0	1	0	1	1	0	0	0	0	0	3	0	1	0	2	2	0
denovo448	0	0	0	0	0	0	0	0	0	0	0	0	0	0	0	0	0	0	0	0	2	0	0	0	0	0	0	0	0	0	0	0	0	0	0	0	0	0	0	0	0	0	0	0	0	0	0	0	0
denovo449	1	1	2	0	12	3	1	8	5	1	3	4	0	1	0	6	0	2	3	0	0	1	0	0	0	2	2	1	1	2	6	1	4	5	2	1	8	0	1	4	0	0	7	7	3	0	1	1	18
denovo450	0	0	0	0	0	0	0	0	0	1	0	1	1	0	0	0	3	0	0	1	0	1	0	0	0	0	0	1	0	0	0	1	0	0	0	1	0	0	1	0	0	7	0	0	0	0	0	0	0
denovo452	0	1	3	0	0	1	0	0	1	0	0	0	0	0	0	0	0	0	0	0	0	0	1	0	0	0	0	0	0	0	0	0	0	0	0	1	1	0	0	0	0	0	0	0	1	0	1	0	1
denovo453	12	7	3	0	14	0	0	0	4	0	0	5	0	1	0	1	2	1	4	0	1	0	0	1	0	8	0	1	2	4	4	0	0	0	2	0	1	0	0	8	0	1	1	2	1	0	1	0	0
denovo454	1	0	0	0	0	0	0	0	0	0	0	0	0	1	1	2	0	0	0	1	0	0	2	0	1	0	0	1	0	0	0	0	0	0	0	0	2	0	1	1	1	0	0	0	0	0	0	4	1
denovo457	24	13	19	5	21	3	8	7	23	10	4	22	14	8	22	11	3	12	3	1	4	11	5	5	2	5	9	9	1	20	11	1	10	8	16	4	11	4	10	5	7	8	2	4	22	8	8	15	10
denovo458	0	0	0	0	0	0	0	0	0	1	0	0	0	0	0	0	0	1	0	0	0	0	0	1	0	0	0	2	0	0	0	0	0	0	0	0	0	0	0	0	2	0	0	0	0	0	0	0	0
denovo460	25	0	3	0	7	15	2	6	30	3	4	5	2	0	4	0	0	0	0	0	0	0	0	1	0	51	0	0	0	5	3	1	1	4	2	9	6	1	0	2	1	6	6	0	1	3	0	0	10
denovo461	0	0	0	0	0	0	0	0	0	0	0	0	0	0	0	0	0	0	0	0	0	0	0	0	0	0	0	0	0	0	0	0	0	0	1	0	0	0	0	0	0	0	0	0	0	0	0	0	0
denovo462	0	0	0	0	0	0	0	0	0	0	0	0	0	0	0	0	0	0	0	0	0	0	0	0	0	0	0	0	0	0	0	0	0	0	0	0	0	0	0	0	0	0	0	0	0	0	0	0	0
denovo464	0	0	0	0	0	0	0	0	0	0	0	0	0	0	0	2	0	0	0	0	0	0	0	0	0	0	0	0	0	0	0	0	0	0	0	0	0	0	0	0	0	0	0	0	0	0	0	0	0
denovo465	1	1	4	0	1	9	0	8	2	1	0	1	0	0	2	0	1	0	0	0	0	0	0	0	0	6	0	0	1	0	0	0	2	2	9	3	8	0	0	7	0	1	9	0	1	0	1	1	1
denovo466	1	0	0	0	0	2	0	1	2	2	0	0	0	0	0	1	0	0	0	0	0	0	0	0	0	1	0	0	0	0	0	0	0	0	0	0	1	0	0	0	0	1	0	0	0	0	0	1	2
denovo467	1	0	0	0	0	0	0	0	0	4	0	0	0	0	1	4	0	0	0	0	0	0	0	0	6	0	0	1	0	0	0	0	0	0	0	3	0	1	1	0	0	2	0	1	0	0	0	0	0
denovo469	0	0	0	0	0	0	0	0	0	0	0	0	0	0	0	0	0	0	0	0	0	0	0	0	0	0	0	1	0	0	0	0	0	0	0	0	0	0	0	0	0	1	0	0	0	0	0	0	0
denovo470	0	0	0	0	0	0	0	0	0	0	0	0	0	0	0	1	1	0	0	1	0	0	0	0	0	0	0	0	0	0	0	0	0	0	0	0	0	0	0	0	0	0	0	1	0	0	0	0	0
denovo471	0	0	0	2	0	0	0	1	0	0	0	1	0	0	0	0	0	0	0	0	0	0	0	0	0	0	0	1	0	0	0	0	0	0	1	0	0	0	0	0	0	1	0	0	0	0	0	0	0
denovo472	0	0	0	0	0	0	0	0	0	0	0	0	0	0	0	0	0	0	0	0	0	0	0	0	0	0	0	0	0	0	0	0	0	0	0	0	0	0	0	0	0	0	0	2	0	0	0	0	0
denovo473	0	0	0	0	0	0	0	0	0	0	0	0	0	0	0	0	0	0	0	0	0	0	0	0	0	0	0	0	0	0	0	0	1	0	0	0	0	0	0	0	0	0	0	0	0	0	0	0	0
denovo474	0	0	0	0	0	0	0	0	0	0	0	0	0	0	0	0	0	0	0	0	0	0	0	0	0	0	0	0	0	0	0	0	0	0	1	0	0	2	0	0	0	0	0	0	0	0	0	0	0
denovo475	1	0	0	0	0	0	0	0	0	0	0	0	0	0	0	0	0	0	0	0	0	0	3	0	0	0	0	0	0	0	0	0	0	0	0	0	0	0	0	0	0	0	0	0	0	0	0	0	2
denovo476	0	0	0	0	0	0	0	0	0	0	0	0	1	0	1	1	1	0	1	0	0	0	0	0	0	0	0	0	0	0	0	1	0	0	0	0	0	0	0	0	0	0	0	0	0	0	0	0	0
denovo478	0	0	0	0	2	0	0	0	0	0	0	0	0	0	0	0	0	0	0	0	0	0	0	0	0	0	0	0	0	0	0	0	0	0	0	0	0	0	0	0	0	0	0	0	0	0	0	1	0
denovo479	0	0	0	0	0	0	0	0	1	0	0	0	0	0	2	0	0	0	0	0	0	0	0	0	0	5	0	0	0	0	0	0	0	0	0	0	0	0	0	0	0	0	0	0	0	0	0	0	0
denovo480	0	0	0	0	0	0	0	0	0	0	0	0	0	0	0	0	0	0	0	0	2	0	0	0	0	0	0	1	1	0	0	0	0	0	0	0	0	0	0	0	0	0	0	0	0	2	0	0	0
denovo484	0	0	0	0	0	1	0	0	1	0	0	0	0	0	0	0	3	0	0	0	0	0	0	0	1	0	4	0	0	0	0	0	0	0	0	0	0	0	0	0	0	0	0	0	0	0	0	0	0
denovo485	0	0	0	0	0	0	0	0	0	0	0	0	3	0	0	0	0	0	0	0	0	0	0	0	3	0	2	0	0	0	0	0	0	0	0	0	0	0	1	0	0	0	0	0	0	0	2	0	0
denovo488	0	0	0	0	2	0	0	0	1	0	0	0	0	0	0	0	0	0	0	0	0	0	0	0	0	0	0	0	0	0	0	0	0	0	0	0	0	0	2	0	0	0	0	0	0	0	0	1	0
denovo489	0	0	0	0	0	0	0	0	0	0	0	0	0	0	0	0	0	0	0	0	0	0	0	0	0	0	0	0	0	0	0	0	0	0	0	0	0	0	0	0	0	0	0	2	0	0	0	0	0
denovo490	0	0	0	20	0	0	0	0	0	0	0	0	0	0	0	0	0	1	0	0	19	0	0	1	0	0	0	0	0	0	0	0	0	0	0	0	0	0	0	0	0	0	0	1	0	0	0	0	0
denovo491	0	0	0	0	4	0	0	0	0	1	0	1	0	0	0	0	0	0	0	0	0	0	0	0	0	0	0	0	0	3	0	0	0	0	0	0	0	0	0	1	0	1	0	0	0	0	0	0	0
denovo492	3	6	2	0	1	0	0	0	22	0	0	0	0	0	5	0	0	0	0	0	0	0	0	0	0	1	0	0	0	1	0	0	0	0	0	0	1	0	0	0	0	0	2	2	0	0	0	0	1
denovo493	0	0	0	0	2	0	2	0	1	0	0	0	0	0	0	0	0	0	1	2	0	4	5	0	2	1	2	0	1	3	0	0	0	1	1	0	0	0	1	1	0	0	4	3	0	1	0	0	3
denovo494	0	0	0	0	0	0	0	0	1	0	0	0	0	0	0	0	0	0	0	0	0	0	0	0	0	0	0	0	0	0	0	0	0	0	0	0	0	0	0	0	0	0	4	0	0	0	0	0	0
denovo498	0	0	0	0	0	0	0	0	0	0	0	0	0	0	0	0	0	0	0	0	0	0	0	0	1	0	0	0	0	0	0	0	0	0	0	0	0	0	1	0	0	0	0	0	0	0	0	0	0
denovo499	0	0	24	1	15	1	5	9	0	26	0	18	7	15	1	20	0	6	5	5	0	10	4	1	7	0	6	1	8	56	0	1	10	6	2	7	1	0	11	12	4	55	26	6	1	6	10	1	5
denovo501	0	0	0	0	0	0	0	0	0	0	0	1	0	0	0	1	0	0	0	0	0	0	0	0	0	0	1	0	0	0	0	1	0	0	0	0	0	0	0	0	0	0	0	0	0	0	0	0	0
denovo502	0	0	0	0	0	0	0	0	0	0	0	0	0	4	0	5	3	0	2	2	0	2	0	1	0	0	0	0	0	0	0	1	0	0	0	0	0	0	2	0	0	0	0	0	0	0	0	0	0
denovo503	0	0	0	0	1	0	0	0	0	0	0	0	0	2	0	0	0	0	0	0	0	0	0	0	0	0	0	0	1	1	0	0	0	1	0	0	0	0	1	0	0	0	0	6	1	3	0	0	3
denovo504	0	0	0	0	0	0	0	1	0	0	0	0	1	0	0	6	3	0	1	1	0	0	1	0	0	0	0	0	1	2	0	2	0	0	3	1	0	0	2	0	1	1	0	0	0	1	0	0	0
denovo505	0	1	0	0	0	0	3	3	0	0	0	2	1	1	0	3	0	1	0	1	0	0	0	0	1	0	0	1	0	0	1	0	24	2	1	0	0	0	3	0	0	3	0	0	0	0	0	1	0
denovo506	0	0	0	0	0	0	0	1	0	1	0	0	0	0	0	0	0	0	0	0	0	0	0	0	3	0	0	0	0	0	0	0	0	0	0	0	0	0	0	0	0	10	0	0	0	0	0	0	0
denovo507	0	0	0	0	0	0	0	0	0	0	0	0	0	0	0	0	0	0	0	0	0	0	0	0	0	0	0	0	0	0	0	0	0	0	0	0	0	0	0	0	0	0	0	0	0	0	0	0	0
denovo508	0	0	0	0	1	0	0	2	1	0	0	0	0	0	1	1	1	1	0	0	1	1	0	0	1	0	0	0	1	1	0	0	0	1	1	0	0	0	0	0	0	1	0	0	2	0	0	0	0
denovo510	2	1	0	1	7	4	0	4	3	0	0	3	4	0	6	2	0	3	2	2	1	0	7	3	3	5	0	0	0	5	0	0	2	0	0	4	2	0	1	1	2	3	0	0	0	1	3	2	0
denovo511	80	2	28	90	205	31	24	209	31	442	42	372	238	126	40	339	209	88	887	124	65	197	77	86	226	65	150	515	154	234	12	44	44	36	81	101	3	15	259	102	205	256	50	332	40	454	102	48	58
denovo513	0	0	0	0	0	0	0	0	0	1	0	0	0	0	0	0	0	0	0	0	0	0	0	0	0	0	1	0	0	0	0	0	0	0	0	0	0	0	0	0	0	0	0	0	0	0	0	0	0
denovo514	0	0	0	0	0	0	0	0	0	0	0	0	0	0	0	0	0	0	0	0	2	0	0	0	0	0	0	0	0	0	0	0	0	0	0	0	0	0	0	0	0	0	0	0	0	0	0	0	0
denovo516	0	0	0	0	0	0	0	0	0	0	0	0	0	0	0	0	0	0	0	0	0	0	0	0	0	0	0	0	0	0	0	0	0	0	0	0	0	0	0	0	0	0	0	0	0	0	0	0	0
denovo517	0	0	0	0	0	0	0	0	0	0	2	0	0	0	2	1	0	0	0	0	0	0	0	0	3	0	0	0	0	0	0	0	3	0	0	0	0	0	0	0	0	0	0	0	0	0	0	0	0
denovo518	0	0	0	0	3	0	0	0	0	0	0	1	0	0	0	0	0	0	0	0	0	0	0	0	0	0	0	0	0	2	0	0	0	0	0	0	0	1	0	0	0	0	0	0	1	0	0	0	0
denovo519	0	0	1	0	0	0	0	1	1	0	1	2	0	0	5	0	0	0	0	0	0	0	0	0	0	0	0	4	0	2	0	0	5	0	0	0	0	0	0	2	0	0	0	0	0	0	0	0	1
denovo520	0	0	0	0	0	0	0	0	0	0	0	0	0	0	1	0	0	1	0	0	0	2	0	0	0	0	0	0	0	0	0	0	0	0	0	0	0	0	0	0	0	0	0	0	0	0	0	0	0
denovo521	0	0	0	0	0	0	0	0	0	0	0	0	0	0	0	0	0	0	0	0	0	0	0	0	0	0	1	0	0	1	0	0	2	0	0	0	0	0	0	0	0	0	0	0	0	2	1	0	0
denovo522	0	0	0	0	0	0	0	0	0	0	0	0	0	0	0	0	0	2	0	0	0	0	0	0	0	0	0	0	0	0	0	0	0	0	0	0	0	0	0	0	0	0	0	0	0	0	0	0	0
denovo523	33	23	43	19	57	101	21	57	47	27	26	46	29	18	48	31	5	13	26	11	9	9	11	7	24	53	13	20	14	64	17	3	12	46	25	22	17	11	22	25	15	30	75	43	31	44	25	25	43
denovo524	4	0	2	0	3	8	1	1	1	0	0	1	3	0	0	0	0	0	0	0	0	0	0	0	1	2	0	0	0	2	8	0	0	3	1	0	2	1	0	6	0	0	4	0	0	2	0	2	1
denovo525	0	0	0	0	0	0	0	0	0	0	0	0	0	0	0	0	0	0	0	0	0	0	0	2	0	0	0	0	0	0	0	0	0	0	0	0	0	0	0	0	0	0	0	0	0	0	0	0	0
denovo526	3	0	1	0	1	0	0	0	1	1	2	2	0	0	4	0	0	0	0	0	0	0	0	0	0	0	0	1	0	0	1	0	0	0	0	0	3	0	0	1	0	0	0	0	0	0	0	1	0
denovo527	0	0	0	0	0	0	0	0	0	0	0	0	0	0	0	0	0	1	2	0	0	0	0	0	0	0	0	2	0	0	0	0	0	0	0	0	0	0	0	0	0	0	0	1	0	0	0	0	0
denovo528	0	0	0	0	7	0	0	7	0	1	0	0	0	0	0	0	1	0	1	0	0	0	0	2	0	0	1	0	0	2	2	0	0	0	6	0	0	0	0	2	0	6	7	0	4	3	7	3	0
denovo529	0	0	0	0	0	0	0	0	0	0	0	0	0	0	0	0	0	0	0	0	0	0	0	0	0	0	0	0	0	0	0	0	0	0	1	0	0	0	0	0	0	1	0	0	0	0	0	0	0
denovo530	0	0	0	0	0	0	0	0	0	0	0	0	0	0	0	0	0	0	0	0	0	0	0	0	0	0	2	0	0	0	0	0	1	0	1	0	0	0	0	0	0	0	0	0	0	0	2	0	0
denovo532	0	0	0	0	0	0	0	0	0	0	0	0	0	0	0	0	0	0	0	0	0	0	0	0	0	0	0	0	0	0	0	0	0	0	0	0	0	0	0	0	0	0	0	0	0	0	0	0	0
denovo533	0	0	0	0	0	0	0	0	0	0	0	0	0	0	0	0	0	0	0	0	2	0	0	0	0	0	0	0	0	0	0	0	0	0	0	0	0	0	0	0	0	0	0	0	0	0	0	0	0
denovo535	0	0	0	1	0	0	0	0	0	0	0	0	0	0	0	0	0	0	0	0	0	0	0	0	0	0	0	0	0	0	0	0	0	0	0	0	0	0	0	0	0	0	0	0	0	0	0	0	0
denovo536	0	0	0	0	3	1	1	0	0	0	0	2	1	1	0	0	0	0	0	0	0	0	1	0	2	6	0	0	0	5	0	0	0	0	2	2	0	0	1	4	0	2	8	0	0	3	0	1	1
denovo537	0	0	0	0	0	0	0	0	0	0	0	0	0	0	0	0	0	0	0	0	0	0	1	0	0	0	0	0	0	0	0	0	0	0	0	0	0	0	0	0	0	0	0	0	1	0	0	1	0
denovo538	0	0	0	14	0	0	0	0	0	0	0	0	0	0	0	0	0	0	0	0	10	0	0	0	0	0	0	0	0	0	0	0	0	0	0	0	0	0	0	0	0	0	0	0	0	0	0	0	0
denovo539	0	0	0	0	0	0	0	0	0	0	0	0	0	0	0	1	0	0	0	0	0	0	0	0	0	0	0	0	0	0	0	0	0	0	0	0	0	0	0	0	0	0	0	0	0	0	0	0	0
denovo540	0	0	0	0	12	0	0	4	0	0	0	3	1	0	1	0	1	1	7	2	0	1	1	0	5	17	1	2	1	5	0	1	6	0	0	0	1	1	1	8	0	0	0	2	0	3	0	2	1
denovo541	0	0	0	0	0	0	0	1	0	0	0	0	0	0	0	1	1	0	0	0	0	0	0	0	0	0	0	0	0	0	0	0	0	0	0	1	0	0	0	0	0	0	0	0	0	0	0	0	0
denovo542	7	1	6	0	25	19	4	13	16	11	1	6	12	5	8	6	6	19	23	4	3	11	3	15	13	37	5	12	8	6	5	4	16	11	19	8	14	3	32	15	7	6	8	20	7	8	7	6	12
denovo543	0	0	0	0	0	0	0	0	0	0	0	0	0	0	0	0	0	2	0	0	0	0	0	0	0	0	0	0	0	0	0	0	0	0	0	0	0	0	0	0	0	0	0	0	0	0	0	0	0
denovo544	0	0	0	0	2	0	0	0	0	0	0	0	0	0	0	0	0	0	0	0	0	0	0	0	0	0	0	0	0	0	0	0	0	0	0	0	0	0	0	0	0	0	0	0	0	0	0	0	0
denovo545	0	0	0	0	0	0	0	0	0	0	0	0	0	0	0	0	0	0	0	0	0	0	0	0	0	0	0	0	0	0	0	0	0	0	0	0	0	0	0	0	0	0	2	0	0	0	0	0	0
denovo547	0	0	0	0	1	0	0	0	2	1	0	1	0	0	2	0	0	0	0	0	0	0	0	0	0	3	0	0	1	0	1	0	0	0	0	0	0	0	1	0	0	0	1	1	0	0	0	0	0
denovo548	0	0	0	0	0	0	0	1	0	1	0	0	0	2	0	1	0	3	9	1	0	3	0	3	1	0	0	4	2	0	0	0	0	0	0	0	0	0	1	0	1	0	0	12	0	1	0	0	0
denovo549	0	0	0	0	0	0	0	0	0	0	0	0	0	0	0	0	0	0	0	0	0	0	0	0	0	0	0	0	0	0	0	0	0	0	0	0	0	0	2	0	0	0	0	0	0	0	0	0	0
denovo552	0	0	0	0	2	0	0	0	0	0	0	1	0	0	0	1	0	0	0	0	0	0	0	1	0	0	0	2	0	0	0	0	0	0	0	0	0	0	2	0	0	0	0	0	0	0	0	0	0
denovo553	2	0	4	0	8	16	2	1	1	3	2	2	1	2	3	0	0	0	5	0	0	1	0	0	2	11	0	2	0	4	2	0	1	5	4	0	0	1	1	2	1	0	2	0	6	0	4	0	2
denovo554	0	0	1	0	3	0	0	0	1	0	0	4	0	0	0	0	0	0	0	0	0	0	0	0	0	3	0	0	0	0	5	0	0	0	0	0	0	0	0	0	0	0	1	0	0	0	0	0	0
denovo555	0	3	1	0	2	4	50	30	14	6	1	16	0	0	3	0	0	0	0	0	0	0	0	0	0	4	1	2	0	0	15	0	0	15	6	3	4	0	0	0	1	9	3	2	4	8	3	1	1
denovo556	1	0	1	0	0	0	0	0	0	0	0	0	0	0	0	0	0	0	0	0	0	0	0	0	0	0	0	0	0	0	0	0	0	0	1	1	0	0	0	0	0	1	0	0	0	0	0	0	2
denovo558	0	0	0	0	0	0	2	4	2	1	0	2	0	0	2	0	0	0	0	0	0	0	0	0	0	0	0	0	0	0	0	0	1	1	0	0	0	3	0	0	0	5	0	0	0	0	0	0	0
denovo560	0	0	0	0	1	0	0	0	0	0	0	0	0	0	1	0	0	0	0	0	0	0	0	0	0	0	0	0	0	0	1	0	0	0	0	0	0	0	0	0	0	0	0	0	0	0	0	0	0
denovo561	3	4	1	0	1	0	2	1	4	4	1	1	1	0	9	2	3	3	1	0	0	1	0	0	0	0	1	3	0	0	2	1	1	0	8	2	1	0	4	0	0	2	1	0	2	0	6	1	0
denovo562	0	0	0	1	0	0	0	0	0	0	0	0	0	0	0	0	1	0	3	0	1	0	0	0	0	0	0	0	0	0	0	0	0	0	0	0	0	0	0	0	0	0	0	0	0	0	0	0	0
denovo563	0	0	2	6	0	0	0	0	2	0	0	0	0	1	0	50	3	7	10	0	24	4	6	2	0	4	0	9	4	0	0	0	0	0	1	0	1	0	54	1	0	0	0	11	0	0	0	0	4
denovo565	0	0	0	0	0	0	0	0	0	0	0	0	0	0	0	0	0	0	0	0	0	0	0	1	0	0	1	0	0	0	0	0	0	0	0	0	0	0	0	0	0	0	0	0	0	0	0	0	0
denovo566	0	0	0	1	0	0	0	0	0	0	0	0	0	0	0	0	0	1	0	0	0	0	0	1	0	0	0	0	0	0	0	0	0	0	0	0	0	0	0	0	0	0	0	0	0	0	0	0	0
denovo567	0	0	0	0	0	0	0	0	0	0	0	0	0	0	0	0	0	0	0	0	0	0	0	0	0	1	0	0	0	0	0	0	0	0	0	0	0	0	0	0	0	0	0	0	0	0	0	0	0
denovo569	0	0	0	1	0	0	0	0	0	0	0	0	0	0	0	0	0	6	1	0	2	0	0	0	0	0	0	0	0	0	0	0	0	0	0	0	0	0	0	0	0	0	0	0	0	0	0	0	0
denovo570	0	0	0	0	0	0	0	0	0	0	0	0	0	0	0	0	0	0	0	0	0	0	0	0	0	0	0	0	0	0	0	0	0	0	0	0	0	0	0	0	0	0	0	0	0	0	0	0	0
denovo572	0	0	0	0	0	0	0	0	0	0	0	0	0	0	0	0	0	0	0	0	0	0	0	0	0	0	0	0	0	0	0	0	0	0	0	0	0	0	0	0	0	0	0	0	0	0	0	0	0
denovo573	0	0	0	0	0	0	0	0	0	1	0	0	0	0	0	0	0	0	0	0	0	0	0	0	0	0	0	2	0	0	0	0	0	0	0	0	0	0	0	0	0	0	0	0	0	0	0	0	0
denovo574	0	0	0	0	6	0	0	0	0	0	0	1	0	0	0	0	0	0	0	0	0	0	0	0	0	0	0	0	0	0	0	0	0	0	0	0	0	0	0	0	0	0	0	0	0	0	0	0	0
denovo576	0	0	0	0	0	0	0	0	0	0	0	0	0	0	0	0	0	1	0	0	5	0	0	0	0	0	0	0	0	0	0	0	0	0	0	0	0	0	0	0	0	0	0	0	0	0	0	0	0
denovo577	0	0	0	0	0	0	0	0	1	0	0	4	0	0	1	0	0	0	0	0	1	0	0	0	0	0	0	0	0	0	0	0	1	0	0	0	1	1	0	0	0	0	0	0	0	0	0	0	0
denovo578	0	0	0	0	0	0	0	0	0	0	0	0	0	0	0	0	0	0	0	0	0	0	0	0	0	0	1	0	0	0	0	0	0	0	0	0	0	0	0	0	0	0	0	0	0	0	0	0	0
denovo579	0	0	0	0	0	0	0	0	0	0	0	0	0	0	1	0	0	0	0	0	0	0	0	0	0	0	0	0	0	0	0	0	0	0	0	0	0	0	0	0	0	0	0	0	0	0	0	0	0
denovo580	0	0	0	0	0	0	0	0	0	0	0	0	0	0	0	0	0	0	0	0	2	0	0	0	0	0	0	0	0	0	0	0	0	0	0	0	0	0	0	0	0	0	0	0	0	0	0	0	0
denovo582	5	6	12	6	45	22	8	28	20	17	5	26	52	34	24	16	3	2	127	9	0	22	4	10	37	82	34	14	15	17	9	17	5	8	11	8	32	6	0	18	11	10	7	17	5	46	4	7	6
denovo584	0	0	0	0	0	0	0	0	0	0	0	0	0	0	0	0	0	0	0	0	0	0	0	0	0	0	0	0	0	0	0	0	0	2	0	0	0	0	0	0	0	0	0	0	0	0	0	0	0
denovo586	0	0	0	0	0	0	0	0	0	0	0	0	0	0	1	0	0	0	0	0	0	0	0	0	0	0	0	0	0	0	0	0	0	0	0	0	0	0	0	0	0	0	0	0	0	0	0	0	0
denovo587	0	0	0	0	0	0	0	0	0	0	0	0	0	0	0	0	0	0	1	0	0	0	0	0	3	0	0	0	0	0	0	0	0	0	0	0	0	0	0	0	0	0	0	0	0	0	0	0	0
denovo589	0	0	0	1	0	0	0	0	0	7	0	0	0	5	0	1	1	13	4	1	0	3	0	11	0	0	0	4	0	0	0	0	0	0	0	0	0	0	0	0	0	0	0	0	0	0	0	0	0
denovo591	0	0	0	2	0	0	0	0	0	0	0	0	0	0	0	0	0	3	0	0	4	0	0	0	0	0	0	1	0	0	0	0	0	0	0	0	0	0	0	0	0	0	0	0	0	0	0	0	0
denovo592	0	0	0	1	0	0	0	0	0	0	0	0	0	0	0	0	0	0	0	0	1	0	0	0	0	0	0	0	0	0	0	1	0	0	0	0	0	0	0	0	0	0	0	0	0	0	0	0	0
denovo593	0	0	0	0	0	0	0	0	0	0	0	1	0	0	0	0	0	0	0	0	0	0	0	0	0	0	0	0	0	0	0	0	0	0	0	0	0	0	0	2	0	0	1	0	0	0	0	0	0
denovo595	0	0	0	0	0	0	0	0	0	0	0	0	0	0	0	0	0	0	0	0	0	0	0	0	0	0	0	0	0	0	0	0	0	0	0	0	0	0	0	0	0	0	0	0	0	2	0	0	0
denovo596	7	1	4	1	1	3	1	6	9	3	11	9	7	10	18	2	0	0	3	0	0	5	0	0	1	4	0	1	0	3	5	1	1	1	1	0	4	1	1	0	1	3	2	0	2	5	4	3	2
denovo599	0	0	0	0	0	0	0	0	0	0	0	0	0	0	0	0	0	2	0	0	1	0	0	0	0	0	0	0	0	0	0	0	0	0	0	0	0	0	0	0	0	0	0	1	0	0	0	0	0
denovo600	0	0	0	0	0	0	0	0	0	0	0	0	0	0	0	0	0	0	0	0	0	0	0	0	0	0	1	0	0	0	0	0	0	0	0	0	0	0	0	0	0	0	0	0	0	0	0	0	0
denovo601	0	0	0	0	0	0	0	0	0	0	0	0	0	0	0	0	0	0	0	0	0	0	0	0	0	0	0	0	0	0	0	0	0	0	0	0	0	0	1	0	0	0	0	2	0	0	0	0	0
denovo603	0	0	0	0	1	2	0	0	0	1	0	1	2	1	0	1	0	0	0	0	0	2	0	0	0	0	0	0	0	3	0	0	1	0	0	0	0	0	0	0	0	1	0	0	2	0	0	0	2
denovo606	0	0	0	0	0	0	0	1	0	0	0	0	0	0	0	0	0	0	1	0	0	0	0	0	4	0	0	1	0	0	0	0	0	0	0	1	0	0	0	1	0	0	0	0	0	0	0	2	0
denovo607	0	0	0	2	0	0	0	0	0	0	0	0	0	0	0	0	0	0	0	0	0	0	0	0	0	0	0	0	0	0	0	0	0	0	0	0	0	0	0	0	0	0	0	0	0	0	0	0	0
denovo608	0	0	0	0	0	0	0	0	0	0	0	0	0	0	0	0	0	0	0	0	0	0	0	0	0	0	0	0	0	0	0	0	0	0	0	0	0	0	0	0	0	0	0	0	0	0	0	0	0
denovo609	0	0	0	1	0	0	0	0	0	0	0	0	2	0	0	0	0	1	2	1	0	0	0	0	0	0	0	0	0	0	0	0	0	0	0	0	0	0	0	0	0	0	0	0	0	0	0	0	0
denovo610	0	0	1	0	4	1	0	5	5	5	1	3	1	2	1	1	1	0	2	1	0	0	1	0	1	1	2	4	0	2	1	0	1	3	1	2	0	0	6	1	1	0	0	3	3	1	1	1	4
denovo611	0	0	0	0	0	0	0	0	0	0	0	0	0	0	0	1	0	0	0	0	0	0	0	0	0	0	0	0	0	0	0	0	0	0	0	0	0	0	0	0	0	0	0	0	0	0	0	0	0
denovo612	0	0	0	0	0	0	0	0	0	0	0	0	0	0	0	0	0	0	0	0	0	0	0	0	0	0	0	0	0	0	0	0	0	0	0	0	0	0	0	0	0	0	0	0	0	0	0	0	0
denovo613	0	0	0	0	0	0	0	0	0	0	0	0	0	0	0	1	1	0	1	0	0	0	0	0	1	0	0	0	0	0	0	0	0	0	0	0	0	0	0	0	0	0	0	1	0	0	0	0	0
denovo614	8	0	7	0	8	0	5	13	1	2	0	0	1	6	4	7	1	4	7	0	0	3	0	5	0	0	2	9	0	4	0	3	0	4	3	1	2	2	3	0	1	7	0	1	7	3	3	4	1
denovo615	0	0	0	0	0	0	0	0	0	0	1	0	1	0	2	4	0	0	0	0	0	0	0	0	0	0	0	0	0	0	0	0	0	0	0	0	0	0	1	0	0	1	0	1	0	0	0	0	0
denovo616	0	0	0	0	4	0	0	1	0	0	0	0	0	0	0	0	0	0	0	0	0	0	0	0	0	0	0	0	0	2	2	0	0	0	0	0	0	0	0	1	0	2	0	0	0	0	0	0	3
denovo617	0	0	0	0	0	0	0	0	0	0	0	0	0	0	0	0	0	0	0	0	0	0	0	2	0	0	0	0	0	0	0	0	0	0	0	0	0	0	1	0	0	0	0	0	0	0	0	0	0
denovo618	0	0	0	0	0	0	0	0	0	0	0	0	0	0	0	0	0	0	0	0	0	0	0	0	0	0	0	0	0	0	0	0	0	0	0	0	0	0	0	0	0	0	0	0	0	0	0	0	0
denovo619	0	0	1	0	0	0	0	0	0	0	0	0	0	1	0	0	0	0	0	0	0	4	0	0	0	0	0	0	5	0	0	1	0	0	0	0	0	0	1	0	0	0	0	0	0	0	0	0	0
denovo622	0	0	0	0	4	1	0	0	1	0	0	1	0	0	0	0	0	0	0	0	0	0	0	0	0	3	0	0	0	2	0	0	0	1	0	0	2	1	0	3	0	1	0	0	3	2	2	0	1
denovo623	0	0	0	0	0	0	0	0	0	0	0	0	0	0	0	0	2	0	2	0	0	1	0	0	0	0	0	0	0	0	0	0	0	0	0	0	0	0	0	0	0	0	0	1	0	0	0	0	0
denovo624	0	0	0	0	0	0	0	0	0	0	0	0	0	0	0	0	0	0	0	0	0	0	0	0	0	0	0	0	0	0	0	0	0	0	0	0	0	0	0	0	0	0	0	0	0	0	0	0	0
denovo627	35	10	29	3	12	68	1	15	72	9	53	71	41	67	84	31	5	5	13	8	6	12	14	4	5	84	3	2	37	26	5	11	2	1	14	3	8	152	13	10	4	13	2	2	5	12	16	3	5
denovo630	0	0	0	0	0	0	0	0	0	0	0	1	0	0	1	0	0	0	0	0	0	0	1	0	0	0	0	0	0	1	0	0	0	1	0	0	0	0	0	0	0	0	0	0	1	0	0	0	0
denovo631	1	0	0	0	0	0	0	0	0	0	0	1	0	0	0	0	0	0	0	0	0	0	0	0	0	0	0	0	0	1	0	0	0	0	0	0	0	0	0	0	0	0	0	0	0	0	0	0	0
denovo632	2	0	0	0	1	0	1	0	2	0	0	0	0	0	1	0	0	0	1	0	0	0	0	1	0	0	0	0	0	0	1	0	0	0	1	0	5	0	0	1	0	0	0	2	1	0	0	2	0
denovo634	0	0	1	0	0	0	0	4	0	2	1	0	3	1	0	1	0	0	0	1	0	3	1	0	0	0	0	1	0	0	0	0	0	0	0	0	0	0	1	0	0	3	3	1	0	0	0	0	0
denovo635	0	0	0	0	0	0	0	0	0	0	0	1	0	0	0	0	0	0	0	0	0	0	0	0	0	0	0	0	0	0	0	0	0	0	0	0	0	0	0	0	0	0	0	0	0	0	0	0	0
denovo636	0	0	0	0	0	0	0	0	1	0	0	0	0	0	0	0	0	0	0	0	0	0	0	0	0	0	0	0	0	0	0	0	0	0	0	0	0	0	0	0	0	0	0	0	0	0	0	0	0
denovo637	0	0	0	0	0	0	0	0	0	0	0	1	2	1	2	0	0	3	0	0	0	0	1	0	0	0	1	0	0	0	0	0	0	0	0	0	0	0	1	0	0	0	0	2	0	0	0	0	0
denovo638	0	0	0	0	0	0	0	0	0	0	0	0	0	0	0	0	0	0	0	0	0	0	0	0	0	0	0	0	0	0	0	0	3	0	0	0	0	0	0	0	0	0	0	0	0	0	0	0	0
denovo639	1	0	0	3	0	0	0	0	0	2	0	0	3	1	0	1	3	2	0	0	14	2	0	1	2	0	0	0	0	0	0	0	0	0	0	0	0	0	2	0	0	0	0	0	0	0	0	0	0
denovo641	0	0	0	0	0	0	1	0	0	0	0	0	0	0	0	0	0	0	0	0	0	0	0	0	0	0	1	0	0	0	0	0	1	0	2	0	0	0	0	0	0	0	0	0	0	0	0	0	0
denovo642	0	0	0	2	0	0	0	0	0	0	0	0	0	0	0	0	1	0	2	2	1	1	0	0	3	0	0	1	0	0	0	0	0	0	0	0	0	0	0	0	0	0	0	8	0	0	0	0	0
denovo644	0	0	1	0	4	2	1	1	1	0	0	0	5	0	0	0	0	0	5	0	0	1	2	1	0	3	0	0	0	1	0	0	0	1	0	0	0	1	3	1	0	0	3	1	1	6	0	0	4
denovo646	0	0	0	0	0	0	0	0	0	0	0	0	0	0	0	1	6	0	1	2	3	0	0	0	1	0	0	1	0	0	0	0	0	0	0	0	0	0	0	0	0	0	0	0	0	0	0	0	0
denovo650	15	1	0	0	0	7	0	0	2	0	1	11	0	0	4	1	0	1	0	0	0	1	0	0	0	8	0	1	0	1	0	0	1	0	0	0	0	0	0	0	0	0	0	0	0	1	0	0	0
denovo651	0	0	0	0	0	0	0	0	0	0	0	0	0	0	0	0	2	0	0	1	0	0	0	1	0	0	1	0	0	0	0	1	0	0	0	0	0	0	0	0	0	0	0	0	0	0	0	0	0
denovo652	6	1	6	0	2	1	0	1	2	1	5	9	0	0	4	2	0	0	1	1	0	0	0	0	0	2	0	1	0	1	0	0	0	1	0	0	0	1	0	0	1	0	2	3	0	0	0	0	0
denovo653	2	0	0	0	4	0	0	0	0	4	0	1	0	2	1	0	0	0	2	0	0	1	0	0	0	8	2	4	1	2	0	0	1	0	0	0	0	0	1	3	0	1	0	0	0	0	1	2	0
denovo655	0	0	0	0	0	0	0	0	0	0	0	0	0	0	0	0	2	0	0	0	0	0	0	0	0	0	0	0	0	0	0	0	0	0	0	0	0	0	0	0	0	0	0	0	0	0	0	0	0
denovo657	0	0	0	0	0	0	0	1	0	0	1	1	0	0	0	0	0	0	0	0	0	0	0	0	0	0	0	0	0	0	0	0	0	0	0	0	0	1	0	1	0	0	0	0	0	2	0	0	0
denovo658	0	0	0	0	0	0	0	0	0	0	0	0	0	0	0	0	0	2	0	0	0	1	0	0	0	0	0	0	0	0	0	0	0	0	0	0	0	0	0	0	0	0	0	0	0	0	0	0	0
denovo661	0	0	0	0	2	0	0	0	1	0	0	0	0	0	0	0	0	0	0	0	0	0	0	0	0	0	0	0	0	0	0	0	1	0	0	0	0	0	0	0	0	0	0	0	1	0	0	2	0
denovo663	0	1	0	0	0	0	0	0	0	0	0	0	1	0	0	5	1	7	5	0	1	4	0	3	0	0	1	1	0	0	0	0	0	0	1	0	0	0	4	0	0	0	0	18	0	0	0	0	0
denovo664	0	0	0	0	0	0	0	0	0	0	0	0	0	0	0	0	0	0	0	0	0	0	0	0	0	0	0	0	0	0	0	0	0	0	0	0	0	0	0	0	0	0	0	0	0	0	0	0	0
denovo665	2	0	2	2	4	0	0	3	1	3	1	3	5	2	1	5	2	4	1	0	0	8	1	5	0	0	0	4	3	3	0	1	4	2	4	0	0	0	5	0	3	3	0	6	2	0	6	4	0
denovo666	0	0	0	0	0	0	0	0	0	0	0	0	0	0	0	0	2	0	0	0	0	0	0	0	0	0	0	0	0	0	0	0	0	0	0	0	0	0	0	0	0	0	0	0	0	0	0	0	0
denovo667	0	0	0	1	0	0	0	0	6	0	0	0	0	30	0	0	0	0	0	0	1	991	0	0	0	0	0	0	0	0	0	0	0	0	0	0	0	0	0	0	0	0	0	0	0	0	0	0	0
denovo669	0	0	0	0	0	0	0	0	0	2	0	0	0	1	0	7	5	1	0	0	0	2	5	2	3	0	0	3	0	0	0	0	0	0	0	0	0	0	3	0	0	0	0	2	0	0	0	0	0
denovo670	2	2	0	3	1	3	0	1	3	2	0	0	0	8	0	2	0	1	14	0	2	7	0	2	22	3	2	1	22	0	1	2	0	1	5	4	3	0	1	0	0	1	0	9	1	7	1	0	0
denovo671	0	0	14	8	0	0	0	0	0	0	0	1	0	0	0	0	0	1	3	0	2	0	0	0	0	0	0	0	0	0	0	0	0	0	1	0	0	0	0	0	0	0	0	0	0	0	0	0	0
denovo673	0	0	0	0	0	0	0	0	0	1	0	0	0	0	0	0	0	0	0	0	2	0	0	0	0	0	0	0	0	0	0	0	0	0	0	0	0	0	0	0	0	0	0	0	0	0	0	0	0
denovo675	0	0	0	0	0	0	0	0	0	0	0	0	0	0	0	0	0	0	0	0	0	0	0	0	0	0	0	0	0	0	0	0	0	0	0	0	0	0	0	0	0	0	0	0	0	0	0	0	0
denovo676	1	0	0	0	0	0	2	1	0	0	0	0	0	0	1	0	0	0	0	0	0	0	0	0	0	3	0	0	0	2	4	0	0	0	0	0	0	0	0	0	0	0	1	0	1	0	2	2	1
denovo678	0	0	0	0	0	0	0	0	0	0	0	0	0	0	0	0	0	0	2	0	0	0	0	0	0	0	0	0	0	0	0	0	0	0	0	0	0	0	0	0	0	0	0	0	0	0	0	0	0
denovo679	0	0	0	0	0	0	0	0	0	0	0	0	0	0	0	0	0	0	0	0	0	0	0	0	0	0	0	0	2	0	0	0	0	0	0	1	0	0	0	0	0	3	0	0	0	0	0	0	0
denovo680	0	0	0	0	1	0	0	0	0	0	0	0	1	0	0	0	0	0	1	0	0	0	0	0	0	0	1	0	0	0	0	0	0	0	1	0	0	0	0	0	0	0	0	0	0	1	0	0	0
denovo681	0	0	7	4	2	0	5	4	0	3	0	0	1	1	1	2	8	6	0	0	1	3	3	2	1	0	1	1	0	2	0	0	0	0	9	12	0	0	14	0	0	2	1	1	1	2	0	3	0
denovo682	1	0	2	0	3	0	2	2	0	0	0	1	0	1	0	0	4	0	1	0	0	0	0	1	0	0	0	0	0	4	2	0	0	0	0	1	1	1	1	0	0	0	0	0	0	3	0	1	1
denovo683	0	0	0	0	0	0	0	0	0	0	0	0	0	0	0	0	0	2	0	0	0	0	0	0	0	0	0	0	0	0	0	0	0	0	0	0	0	0	0	0	0	0	0	0	0	0	0	0	0
denovo684	0	0	0	0	0	0	0	0	0	0	0	0	0	0	0	0	0	0	3	0	0	0	0	0	2	0	0	0	3	0	0	0	0	0	0	0	0	0	0	0	0	0	0	0	0	0	0	0	0
denovo685	3	2	1	0	7	1	5	13	8	1	1	4	0	0	0	1	0	0	1	0	0	0	0	0	0	17	0	0	0	1	1	0	0	2	0	0	2	1	0	2	0	0	0	0	1	1	2	0	1
denovo686	1	0	0	0	0	0	0	2	0	1	0	0	0	0	1	0	0	3	0	0	0	1	0	0	0	0	0	0	0	1	0	0	0	0	1	0	0	0	1	0	0	1	0	0	0	0	1	0	0
denovo688	0	1	0	0	0	0	0	1	0	0	0	1	0	2	0	0	0	0	1	0	0	1	0	2	0	0	0	0	0	0	1	1	1	0	2	0	1	0	0	0	0	0	0	0	5	2	0	5	0
denovo689	0	0	0	0	0	0	0	0	0	0	0	0	0	0	0	0	0	0	0	0	0	0	0	0	0	0	0	0	1	0	0	0	0	0	0	0	0	0	0	0	0	0	0	0	0	0	0	0	0
denovo690	0	0	0	1	0	0	0	0	0	0	0	0	0	1	0	0	0	0	0	0	0	0	0	0	1	0	0	0	0	0	0	0	0	0	0	0	0	0	0	0	0	0	0	0	0	0	0	0	0
denovo691	5	0	0	0	0	0	0	0	0	0	0	0	0	0	0	0	0	0	0	0	0	0	0	0	0	0	0	0	0	0	0	0	0	0	0	0	0	0	0	0	0	0	0	0	0	0	0	0	0
denovo692	0	0	0	0	0	0	0	0	0	0	0	0	0	0	0	0	0	2	0	0	0	0	0	1	0	0	0	0	0	0	0	0	0	0	0	0	0	0	0	0	0	0	0	0	0	0	0	0	0
denovo694	0	0	0	2	1	0	0	0	0	0	0	1	0	0	0	0	1	0	1	0	0	0	0	0	1	0	0	0	0	0	0	0	0	0	0	0	0	0	0	0	0	0	0	0	0	0	0	0	0
denovo695	0	0	1	0	2	0	2	6	1	9	0	0	2	0	0	1	0	0	0	1	0	0	0	0	2	1	2	0	0	0	0	0	0	0	2	2	0	0	0	3	0	2	0	0	0	0	0	0	0
denovo696	40	16	11	0	85	23	38	19	35	46	5	32	65	22	29	41	54	27	131	36	1	46	14	26	41	68	38	36	38	54	30	19	13	10	24	14	53	18	119	22	68	12	12	101	27	49	19	16	26
denovo698	0	0	0	0	0	0	0	0	0	0	0	0	0	0	0	0	0	2	2	0	0	0	0	1	0	0	0	0	0	0	0	0	0	0	0	1	0	0	0	0	0	0	0	0	0	0	0	0	0
denovo699	2	2	2	0	6	3	0	1	4	0	0	5	0	0	1	0	0	1	0	0	0	0	0	0	2	1	0	0	0	1	2	0	0	0	0	1	0	0	1	0	0	0	0	5	0	0	2	0	1
denovo700	16	0	0	14	0	8	0	0	6	0	11	13	34	7	19	5	3	2	1	1	6	2	3	1	1	5	0	12	0	1	0	7	0	0	7	0	0	0	2	0	2	0	0	2	0	0	0	0	0
denovo702	0	0	0	0	0	0	0	1	0	1	0	0	0	0	0	0	0	0	0	0	0	0	0	0	0	0	0	0	0	0	0	0	0	0	0	1	1	0	0	0	0	0	0	0	0	0	0	0	0
denovo703	0	0	0	0	0	0	0	0	0	0	0	0	0	0	0	0	0	0	0	0	0	0	0	0	0	0	0	0	0	0	0	0	2	0	0	0	0	0	0	0	0	0	0	0	0	0	0	0	0
denovo704	0	0	0	2	0	0	0	0	0	0	0	0	0	0	0	0	0	1	2	0	0	0	0	0	0	0	0	0	0	0	0	0	0	0	0	0	0	0	0	0	0	0	0	0	0	0	0	0	0
denovo705	0	0	0	0	0	0	0	3	0	0	0	0	0	0	0	0	0	0	0	0	0	0	0	0	0	0	0	0	0	0	0	0	0	4	1	0	0	0	0	0	0	1	0	0	0	0	0	0	0
denovo706	0	0	0	0	0	0	0	0	0	0	0	0	0	0	0	0	0	0	0	0	0	0	0	0	0	0	0	0	0	0	0	0	0	0	0	0	0	0	0	0	1	0	0	1	0	0	0	0	0
denovo708	0	1	0	0	2	0	0	0	0	0	0	0	0	0	0	0	0	0	0	0	0	0	0	0	0	0	0	0	0	0	0	0	0	0	0	0	0	0	0	0	0	0	2	0	0	0	0	0	0
denovo709	0	0	0	0	0	0	0	0	0	0	0	0	0	0	0	0	0	0	0	0	0	0	0	0	0	0	0	0	0	0	0	0	0	0	0	0	0	0	0	0	0	0	0	0	0	0	0	0	0
denovo710	0	0	0	0	4	0	0	0	1	0	0	7	0	0	0	0	0	0	0	0	0	0	0	0	0	0	0	0	0	1	0	0	0	0	0	1	0	0	2	0	0	0	0	0	1	0	0	0	0
denovo711	0	1	0	0	1	0	0	0	0	0	0	0	0	0	0	0	0	0	0	0	0	0	0	0	1	0	0	0	0	0	0	0	0	0	0	0	0	0	0	0	0	0	0	0	0	0	0	0	0
denovo713	2	0	0	0	0	0	0	0	1	0	0	0	0	0	0	0	0	0	0	0	0	0	0	0	0	0	0	0	0	0	0	0	0	0	1	0	0	0	0	0	0	0	0	0	0	0	0	0	0
denovo714	0	0	0	0	0	0	0	0	2	0	0	0	0	0	0	0	0	0	0	0	0	0	0	0	0	0	0	0	0	0	0	0	0	0	0	0	0	0	0	0	0	0	0	0	0	0	0	0	0
denovo716	0	0	0	0	0	0	0	0	0	0	0	0	0	0	0	0	0	0	0	0	0	0	0	0	0	0	0	0	0	0	0	0	0	0	2	0	0	0	0	0	0	3	0	0	1	0	1	0	0
denovo717	0	0	0	1	0	0	0	0	0	0	0	0	0	0	0	0	0	0	0	0	1	0	0	0	0	0	0	0	0	0	0	0	0	0	0	0	0	0	0	0	0	0	0	0	0	0	0	0	0
denovo718	0	0	0	2	0	0	0	0	0	0	0	0	0	0	0	0	0	0	0	0	0	0	0	0	0	0	0	0	0	0	0	0	0	0	0	0	0	0	0	0	0	0	0	0	0	0	0	0	0
denovo719	2	0	0	10	1	0	0	0	0	0	0	3	1	1	1	0	0	0	0	0	0	0	0	1	0	1	0	0	0	0	0	1	1	0	0	3	0	0	0	1	0	0	1	0	0	0	0	0	0
denovo720	11	0	0	0	10	0	0	3	1	6	0	1	0	0	1	0	0	0	0	0	0	0	0	0	0	0	0	1	0	7	1	1	0	3	0	0	0	0	0	1	1	7	0	0	3	0	2	1	1
denovo721	0	0	0	0	0	0	0	10	0	2	0	0	0	4	0	8	0	0	10	0	0	3	0	0	5	0	0	3	3	0	0	7	0	0	1	7	0	0	0	0	1	5	0	25	0	11	0	0	0
denovo722	3	0	0	0	0	0	0	0	1	0	0	0	0	0	1	1	0	0	0	0	0	0	0	0	0	2	0	0	0	0	0	0	0	0	0	0	0	0	0	0	0	0	0	0	0	0	0	0	0
denovo724	0	0	0	0	0	0	0	0	0	0	0	0	0	0	0	0	0	0	0	0	0	0	0	0	0	0	0	0	0	0	0	0	0	0	0	0	0	0	0	0	0	0	0	0	4	0	0	0	0
denovo725	12	2	0	0	6	3	0	3	31	1	1	4	0	0	2	0	0	0	0	0	0	0	1	0	0	4	0	0	0	8	3	0	0	1	1	1	6	0	0	5	0	3	1	0	0	1	1	1	6
denovo726	0	0	0	0	0	0	1	0	0	0	0	0	0	5	0	0	0	0	0	0	0	0	1	0	1	0	0	0	1	0	0	0	0	1	0	1	0	0	1	0	0	0	0	0	0	0	0	0	0
denovo727	0	1	0	0	0	0	3	0	0	0	1	0	0	0	0	0	0	0	0	0	0	0	0	1	0	0	0	0	0	0	0	0	0	0	0	0	0	0	0	0	0	0	0	0	0	0	0	0	0
denovo728	8	8	4	0	2	2	0	1	10	0	14	17	5	1	21	4	0	0	0	1	0	1	3	0	0	4	0	1	2	7	15	3	2	0	0	0	17	4	4	1	0	0	1	0	1	1	3	0	3
denovo729	2	1	0	0	4	0	0	0	0	0	0	0	0	0	0	0	1	0	1	0	0	0	1	0	0	0	3	0	0	3	1	0	0	0	0	2	1	0	1	3	0	0	0	0	0	0	0	0	0
denovo732	2	0	9	0	7	0	0	30	0	0	0	4	0	1	2	0	0	0	0	0	0	1	0	0	0	1	1	2	1	8	1	0	0	1	0	0	1	0	0	3	0	10	3	1	10	0	14	7	1
denovo733	0	0	0	3	0	0	0	0	0	0	0	0	1	0	0	1	0	3	8	0	1	0	0	6	2	0	1	5	0	0	0	0	0	0	0	3	0	0	0	0	0	0	0	3	0	0	0	0	0
denovo734	2	0	0	13	0	0	0	1	0	3	2	4	0	0	0	0	0	5	1	1	1	0	0	3	0	2	0	0	0	0	0	0	0	0	0	1	0	0	0	0	0	0	0	0	0	0	0	0	0
denovo735	0	0	0	0	0	0	0	0	0	0	0	0	0	0	0	0	0	0	0	0	0	0	0	0	0	0	0	0	0	0	0	0	0	0	0	0	0	0	0	0	0	0	0	0	0	0	0	0	0
denovo736	0	0	0	0	0	0	0	0	0	0	0	0	0	0	0	0	0	0	0	0	0	0	0	0	0	0	0	0	0	0	0	0	0	0	0	0	0	0	0	0	0	0	0	0	0	0	0	0	0
denovo737	0	0	0	0	0	0	0	0	0	0	0	0	0	0	0	0	0	0	0	0	0	0	0	0	0	0	0	0	0	0	0	0	0	0	0	0	0	0	0	0	0	0	0	0	0	0	0	0	0
denovo738	0	0	0	0	0	0	0	0	0	1	0	0	0	0	0	0	0	1	1	0	0	0	0	1	0	0	0	4	0	0	0	0	0	0	0	0	0	0	0	0	0	0	0	0	0	0	0	0	0
denovo740	0	0	0	2	0	0	0	0	0	0	0	0	0	0	0	0	0	0	0	0	12	0	0	0	0	0	0	0	0	0	0	0	0	0	0	0	0	0	0	0	0	0	0	0	0	0	0	0	0
denovo741	0	0	0	0	0	0	0	0	0	0	0	0	0	0	0	0	0	0	1	0	0	0	0	0	0	0	0	0	0	0	0	0	0	0	0	0	0	0	0	0	0	0	0	0	0	0	0	0	0
denovo742	0	0	0	1	0	0	0	0	0	0	0	0	0	1	0	0	0	0	0	0	0	0	0	0	0	0	0	0	0	0	0	0	0	0	0	0	0	0	0	0	0	0	0	0	0	0	0	0	0
denovo743	0	0	0	0	0	0	0	0	0	0	0	0	0	0	0	0	0	0	0	0	0	0	0	0	0	0	0	0	0	0	0	0	0	0	0	0	0	0	0	0	0	0	0	0	0	0	0	0	0
denovo744	0	0	0	0	0	0	0	0	0	0	0	0	0	0	0	0	0	0	0	0	0	0	0	0	0	3	0	0	0	0	0	0	0	0	0	0	0	0	0	0	0	0	0	0	0	0	0	0	0
denovo745	0	0	0	0	0	0	0	0	0	0	0	0	0	0	0	0	0	0	0	0	0	1	0	0	0	0	0	0	0	0	0	0	0	0	0	0	0	0	0	0	0	0	0	0	0	0	0	0	0
denovo746	50	14	12	0	3	0	8	12	3	10	6	1	3	3	7	1	1	10	2	0	0	9	0	1	0	0	0	13	0	4	4	1	0	1	1	6	2	0	0	0	3	4	2	9	0	1	1	3	9
denovo747	1	0	0	0	0	0	0	0	0	0	0	0	0	0	0	0	0	0	0	0	0	0	0	0	0	0	0	0	0	0	0	0	0	0	0	0	0	0	0	0	0	0	0	0	0	0	0	0	0
denovo748	0	0	0	0	0	0	0	0	0	1	0	0	0	3	0	0	1	0	0	0	0	1	0	0	3	0	0	0	1	0	0	0	0	0	0	0	0	0	5	0	0	0	0	0	0	0	0	0	0
denovo750	0	0	0	0	0	0	0	0	0	0	0	0	0	0	0	0	0	0	0	0	0	0	0	0	0	0	0	1	0	0	0	0	0	0	0	0	0	0	0	0	1	0	0	0	0	0	0	0	0
denovo752	0	1	0	0	4	0	0	0	0	0	0	1	0	0	0	0	0	0	0	0	0	0	0	0	0	0	0	0	0	1	1	0	0	2	0	0	0	0	0	0	0	0	1	0	0	0	0	0	0
denovo753	0	0	0	0	0	0	0	0	0	0	0	0	0	0	0	0	0	0	0	0	0	0	0	0	0	0	0	0	0	0	0	0	0	0	0	0	0	0	0	0	0	0	0	0	0	0	1	0	0
denovo754	0	0	5	0	0	0	0	0	0	1	0	0	0	1	0	3	0	0	1	0	0	0	1	1	0	0	0	0	0	0	0	0	0	0	2	0	0	0	0	0	0	0	0	0	0	0	0	0	0
denovo755	0	0	1	0	0	0	0	0	0	0	0	0	0	0	0	0	0	0	0	1	0	0	0	0	0	0	0	0	0	0	0	0	0	0	0	0	0	0	0	0	0	0	0	0	0	0	0	0	0
denovo756	0	0	0	0	0	0	0	0	0	0	0	0	0	0	0	0	0	3	0	0	0	0	0	0	0	0	0	0	0	0	0	0	0	0	0	0	0	0	0	0	0	0	0	0	0	0	0	0	0
denovo757	6	3	10	0	8	6	0	10	34	5	1	4	7	12	2	8	0	0	7	0	0	2	2	3	6	11	1	5	4	3	6	1	0	5	2	0	4	1	1	7	1	0	3	6	2	1	2	4	7
denovo759	1	0	0	0	1	0	0	1	0	0	0	0	0	0	0	0	0	0	0	0	0	0	0	0	0	0	0	1	0	0	0	0	0	0	0	0	1	0	0	0	0	0	0	0	0	0	0	0	0
denovo760	1	0	2	1	4	0	4	0	1	0	1	1	1	1	2	0	0	0	0	0	0	0	0	0	0	0	0	0	0	1	4	1	0	0	0	0	1	0	0	1	0	0	0	0	0	0	0	0	0
denovo761	5	2	2	0	1	0	0	0	3	0	2	0	3	0	8	1	0	0	0	0	0	0	0	0	0	1	0	0	0	0	0	0	0	0	1	0	2	0	0	0	0	0	0	0	0	0	0	1	0
denovo762	0	0	0	0	0	0	0	0	0	1	1	0	0	0	0	0	0	0	0	0	0	1	0	1	0	0	0	1	0	0	0	0	0	0	0	0	0	0	0	0	0	1	0	0	0	0	0	0	0
denovo763	0	0	0	0	0	0	0	2	0	0	0	0	0	0	0	0	0	0	0	0	0	0	0	0	0	0	1	0	0	0	0	0	0	0	1	0	0	0	0	0	0	0	0	1	0	0	0	0	0
denovo764	0	0	0	0	0	0	0	0	0	0	0	0	0	0	0	1	1	0	0	0	0	1	1	1	0	0	0	0	0	2	0	0	0	0	0	0	0	0	1	0	0	0	0	0	1	0	0	0	0
denovo765	0	0	0	8	0	0	0	0	0	0	0	0	0	0	0	0	0	2	0	0	6	0	0	0	0	0	0	0	0	0	0	0	0	0	0	0	0	0	0	0	0	0	0	0	0	0	0	0	0
denovo767	0	0	0	0	0	0	0	0	0	0	1	0	0	0	0	0	0	0	0	0	0	0	0	0	0	0	0	0	0	0	0	0	0	0	0	0	0	0	0	0	0	0	0	0	0	0	0	0	0
denovo768	0	0	0	0	0	0	1	0	1	0	0	0	0	0	0	0	0	0	0	0	0	0	0	0	0	0	0	0	0	0	0	0	0	0	0	0	0	0	0	0	0	0	0	0	0	0	0	0	0
denovo771	0	0	0	2	0	0	0	1	0	0	0	0	0	0	0	0	0	0	1	0	0	0	0	2	0	0	0	0	0	0	0	0	0	0	1	1	0	0	0	0	0	0	0	0	4	0	2	1	0
denovo774	0	0	0	2	0	0	0	0	0	0	0	0	0	0	0	0	0	0	0	0	0	0	0	0	0	0	0	0	0	0	0	0	0	0	0	0	0	0	0	0	0	0	0	0	0	0	0	0	0
denovo775	2	0	0	0	0	0	0	0	0	0	0	0	0	0	0	0	0	0	0	0	0	0	0	0	0	0	0	0	0	0	0	0	0	0	0	0	0	0	0	0	0	0	0	0	0	0	0	0	0
denovo777	6	4	10	0	43	7	16	20	15	4	7	10	5	1	8	4	7	3	13	2	6	4	0	4	12	7	7	2	11	20	13	0	0	11	4	5	16	9	12	30	1	8	7	30	6	28	5	9	8
denovo778	0	0	0	0	0	0	0	0	0	0	0	0	0	0	0	0	0	0	0	0	2	0	0	0	0	0	0	0	0	0	0	0	0	0	0	0	0	0	0	0	0	0	0	0	0	0	0	0	0
denovo779	0	0	0	0	0	0	0	0	0	1	0	0	0	0	0	0	0	0	0	0	0	0	0	0	0	0	0	0	0	0	0	0	0	0	0	0	0	0	0	0	0	0	0	1	0	0	0	0	0
denovo780	0	0	0	3	0	0	0	0	0	0	0	0	0	15	0	17	24	1	18	10	1	29	1	3	15	0	0	0	10	0	0	7	0	0	0	0	0	0	3	0	0	0	0	9	0	0	0	0	0
denovo781	1	2	5	0	8	3	0	6	3	1	0	15	0	0	1	1	0	0	0	0	0	0	0	0	0	0	0	0	0	4	0	0	0	0	0	0	0	2	0	2	0	2	4	0	4	0	0	1	1
denovo783	0	0	0	0	1	0	0	0	0	0	0	0	0	0	0	0	1	0	0	0	0	0	0	0	0	0	0	0	0	0	0	0	0	0	0	0	0	0	0	0	0	0	0	0	0	0	0	0	0
denovo784	164	24	66	0	33	6	0	0	84	0	0	1	0	0	9	1	0	1	3	0	3	3	0	1	1	60	0	6	1	0	108	0	0	0	0	0	30	5	2	15	0	0	34	4	0	0	0	0	47
denovo785	0	0	0	0	0	0	0	0	0	0	0	0	0	0	0	0	0	0	0	0	0	0	0	0	0	0	0	0	0	0	0	0	0	0	0	0	0	0	0	0	0	0	0	0	0	0	0	0	0
denovo786	1	0	1	0	0	4	2	0	0	0	0	8	1	0	0	2	1	0	3	0	1	0	0	1	2	1	0	1	0	1	1	1	0	0	0	0	0	0	0	1	0	0	0	0	0	2	0	0	0
denovo788	0	0	0	0	2	0	0	1	3	2	0	0	0	0	2	1	0	0	0	0	2	0	0	0	0	8	0	1	0	0	1	0	1	0	1	0	2	0	0	1	0	0	0	0	0	0	0	0	0
denovo789	0	1	0	0	2	0	1	1	2	4	0	0	4	0	0	0	0	1	2	0	0	1	0	1	0	1	0	1	1	0	3	1	0	0	0	0	0	0	2	1	0	0	0	2	0	0	0	0	0
denovo790	0	0	0	0	0	0	0	0	0	0	0	0	0	0	0	0	0	0	0	0	0	0	0	0	0	0	0	0	0	0	0	0	0	0	0	0	0	0	0	1	0	0	0	0	0	0	0	0	0
denovo791	0	0	0	0	0	0	0	0	0	0	0	0	0	0	1	0	0	0	0	0	0	0	0	0	0	0	0	0	0	0	0	0	0	0	0	0	0	0	0	0	0	0	0	0	0	0	0	0	0
denovo792	0	0	0	0	0	0	0	0	0	0	0	0	0	0	0	1	1	0	0	0	0	2	0	0	0	0	0	0	0	3	1	0	1	0	0	0	0	0	1	0	0	0	0	0	0	0	1	0	0
denovo796	1	1	0	0	5	0	1	0	0	0	0	0	0	0	2	0	2	0	0	2	0	2	0	0	0	0	1	0	0	0	0	0	0	0	1	0	0	0	0	0	0	0	0	0	1	0	0	0	1
denovo797	3	0	0	1	0	0	0	0	0	1	0	2	3	0	0	3	5	1	6	5	1	3	2	7	3	5	2	3	3	1	0	5	2	0	0	0	0	1	7	0	2	0	0	1	0	0	0	0	0
denovo798	3	1	1	0	4	1	0	3	3	2	0	3	0	1	2	0	0	0	2	0	0	0	0	0	0	3	0	1	0	0	5	0	0	1	0	0	0	0	1	1	1	0	0	0	0	1	0	0	0
denovo800	0	0	0	0	2	0	1	0	0	0	0	0	0	0	1	2	0	0	0	0	0	1	0	0	0	0	0	0	0	1	4	0	0	0	0	0	0	0	0	0	1	0	0	0	1	2	1	0	0
denovo801	0	0	0	0	1	0	0	0	0	0	0	0	0	0	0	1	1	0	0	0	0	1	0	0	0	0	0	1	0	0	0	1	0	0	0	1	0	0	0	0	0	0	0	0	0	0	0	0	0
denovo802	0	0	0	3	0	0	0	0	0	0	0	0	0	0	0	0	0	0	0	0	19	0	0	0	0	0	0	0	0	0	0	0	0	0	0	0	0	0	0	0	0	0	0	0	0	0	0	0	0
denovo803	0	0	0	0	1	0	0	0	0	0	0	0	0	1	0	0	0	0	0	0	0	0	0	0	1	0	0	0	0	0	0	0	0	0	0	0	0	0	1	0	0	0	0	0	0	0	0	0	0
denovo804	10	5	14	0	71	2	0	2	10	6	3	14	1	17	7	10	7	5	15	6	1	7	14	2	1	0	40	0	2	16	1	5	4	0	2	1	10	4	15	12	0	3	20	17	0	0	1	1	11
denovo805	0	0	0	1	0	0	1	2	1	1	0	0	0	1	0	0	2	0	45	1	0	9	0	0	0	0	0	0	1	0	0	0	0	1	0	1	0	0	1	0	0	2	0	0	0	0	0	0	0
denovo807	1	0	0	2	1	0	0	0	0	0	2	1	1	0	0	0	0	0	1	1	0	1	0	0	1	0	0	2	0	1	1	0	0	0	0	0	0	0	0	0	0	1	4	0	0	0	0	2	0
denovo808	0	0	0	0	0	0	0	0	0	0	0	0	0	0	0	0	0	0	0	0	0	0	0	0	0	0	1	0	0	0	0	0	0	0	0	0	0	0	0	0	0	0	0	0	0	0	0	0	0
denovo809	0	0	0	0	0	0	0	0	0	1	0	0	0	0	0	0	0	0	0	0	0	0	0	0	0	0	0	0	0	0	0	0	0	0	0	0	0	0	0	0	0	1	0	0	0	0	0	0	0
denovo810	0	0	0	0	0	0	0	0	0	0	0	0	0	2	0	0	0	0	0	0	0	0	0	0	0	0	0	1	0	0	0	0	0	0	0	0	0	0	0	0	0	0	0	0	0	0	0	0	0
denovo811	0	0	0	0	0	0	0	0	0	0	0	0	0	0	0	0	0	0	0	0	0	0	0	0	0	0	0	0	0	0	0	0	0	0	0	2	0	0	0	0	0	0	0	0	0	0	0	0	0
denovo812	0	0	0	0	7	0	1	0	0	0	0	1	0	0	1	0	1	1	1	0	0	0	1	2	0	0	0	0	0	2	1	0	1	0	0	1	2	0	1	4	1	0	0	0	0	2	0	0	0
denovo813	0	0	0	0	0	0	0	0	0	0	0	0	0	0	0	0	0	0	0	0	0	0	0	0	0	0	0	1	3	0	0	0	0	0	0	0	0	0	0	0	0	0	0	0	0	0	0	0	0
denovo814	0	0	0	0	0	0	0	0	0	0	0	0	0	0	0	0	0	2	0	0	0	0	0	0	0	0	0	0	0	0	0	0	0	0	0	0	0	0	0	0	0	0	0	0	0	0	0	0	0
denovo815	0	0	0	0	0	0	0	0	0	0	0	0	0	2	0	0	0	0	0	0	0	0	0	0	0	0	0	0	0	0	0	0	0	0	0	0	0	0	0	0	0	0	0	0	0	0	0	0	0
denovo816	0	2	0	0	0	1	0	0	0	0	0	1	0	0	0	0	0	0	0	0	0	0	0	0	0	0	0	0	0	0	0	0	0	0	0	0	0	0	0	1	0	0	0	1	0	1	0	0	0
denovo818	13	28	22	6	81	45	10	43	46	18	7	43	13	19	24	25	8	4	56	4	1	11	3	9	56	89	9	54	17	62	39	1	7	17	5	14	73	22	8	44	10	17	19	29	5	82	1	13	14
denovo819	1	1	6	5	11	0	4	7	2	10	1	3	8	28	0	4	20	11	28	14	1	28	1	23	9	0	1	11	18	8	0	0	3	3	13	20	0	0	36	0	8	9	0	16	0	12	1	0	0
denovo820	0	0	0	0	0	0	0	0	0	0	0	0	0	0	0	0	0	0	0	0	0	0	1	0	0	0	0	0	0	0	0	0	0	0	0	2	0	0	1	0	0	0	0	0	0	4	0	0	0
denovo821	0	0	0	0	1	0	0	0	0	0	0	0	0	0	0	0	0	0	0	0	0	0	0	0	0	0	0	0	0	0	1	0	0	0	0	0	0	0	0	0	0	0	0	0	0	0	0	0	1
denovo822	0	0	0	0	0	0	0	0	0	0	0	0	0	0	0	0	0	0	0	0	0	0	0	0	0	0	0	0	0	0	0	0	0	0	0	0	0	0	0	0	0	0	0	0	0	0	0	0	0
denovo823	0	0	3	0	1	0	0	1	0	0	0	0	0	0	4	0	0	0	0	0	0	0	0	0	0	0	0	0	0	1	2	0	0	0	0	0	1	0	0	1	0	0	0	0	0	0	0	0	5
denovo824	2	0	0	0	5	2	0	0	0	1	0	4	1	1	1	1	0	0	0	0	0	0	0	0	0	5	0	1	0	1	7	0	0	2	2	0	3	1	4	3	0	1	2	0	3	1	0	1	1
denovo825	0	0	0	0	0	0	0	0	0	0	0	0	0	0	0	0	0	0	0	0	0	0	0	0	5	0	0	0	0	0	0	0	0	0	0	0	0	0	0	0	0	0	0	0	0	0	0	0	0
denovo829	0	0	0	0	0	0	0	0	0	0	0	0	0	0	0	1	0	0	0	0	0	0	0	0	0	0	1	0	0	0	0	0	0	0	0	0	0	0	0	0	0	0	0	0	0	0	0	0	0
denovo831	1	0	2	0	1	0	0	0	1	0	1	0	0	0	0	0	0	1	0	0	0	0	0	0	0	0	0	0	0	0	0	0	0	0	0	0	0	0	0	0	0	0	0	0	0	0	0	0	0
denovo832	0	0	0	0	0	0	0	0	0	0	0	0	0	0	0	0	0	2	0	0	0	0	0	0	0	0	0	0	2	0	0	0	0	0	0	0	0	0	0	0	0	0	0	0	0	0	0	0	0
denovo833	0	0	0	0	0	0	0	0	1	0	0	0	0	0	0	0	1	0	0	0	0	0	0	0	0	0	0	0	0	0	0	0	0	0	0	0	0	0	0	0	0	0	0	2	0	0	0	0	0
denovo835	0	1	4	0	8	0	0	2	0	0	0	1	0	0	2	0	0	0	0	0	0	0	0	0	0	0	1	0	0	2	0	0	1	3	1	2	0	2	0	1	0	0	0	0	1	9	1	2	0
denovo836	0	0	0	0	0	0	0	0	0	0	0	0	0	1	0	1	0	0	0	0	0	0	0	0	1	0	0	0	0	0	0	0	0	0	1	0	0	0	0	0	0	0	0	0	0	0	0	0	0
denovo837	1	0	0	0	0	0	0	0	0	0	0	1	0	0	0	0	0	0	0	0	0	0	0	0	0	0	0	0	0	2	0	0	0	0	1	0	0	0	0	0	0	0	0	0	0	0	0	0	0
denovo838	0	0	0	1	0	0	0	0	0	0	0	0	0	0	0	0	0	0	0	0	0	0	0	0	1	0	0	0	3	0	0	0	0	0	0	0	0	0	0	0	0	0	0	0	0	0	0	0	0
denovo839	5	0	2	0	2	3	4	14	0	5	24	0	19	2	20	3	0	2	1	0	2	2	1	4	3	7	1	1	0	0	1	0	2	1	4	4	0	1	0	3	3	9	1	3	0	3	3	2	0
denovo840	0	0	0	0	0	0	0	0	0	0	0	0	0	0	0	0	0	0	0	0	0	0	0	0	0	0	0	2	0	0	0	0	0	0	0	0	0	0	0	0	0	0	0	0	0	0	0	0	0
denovo841	0	0	0	0	1	0	0	0	0	0	0	0	0	0	0	0	0	0	0	0	0	0	0	0	0	0	0	0	0	0	0	0	0	0	0	0	0	0	0	0	0	0	0	0	0	0	1	0	0
denovo845	0	0	0	0	2	0	0	0	0	0	0	1	0	0	1	0	1	1	0	0	0	0	0	0	0	0	1	0	0	0	0	0	0	0	0	0	0	0	0	0	0	1	0	0	1	0	0	0	0
denovo846	0	0	0	7	0	0	0	0	0	2	0	0	6	0	0	0	0	12	0	0	5	13	0	0	0	0	0	0	0	0	0	0	0	0	0	0	0	0	1	0	0	0	0	0	0	0	0	0	0
denovo847	0	0	0	0	0	2	0	0	0	0	0	1	0	0	0	0	0	0	0	0	0	0	0	0	0	0	0	0	0	0	0	0	0	0	0	0	0	0	0	0	0	0	0	0	0	0	0	0	0
denovo849	0	0	2	2	1	0	0	0	0	0	0	1	2	0	2	12	0	1	6	1	4	1	4	1	1	1	0	1	0	0	0	2	0	0	0	1	0	0	0	0	0	0	0	3	0	0	0	0	0
denovo850	0	0	0	0	0	0	1	0	0	0	0	0	0	1	0	2	2	1	4	0	0	2	0	2	2	0	0	1	1	0	0	0	2	0	0	0	0	0	1	0	1	0	0	1	0	0	1	0	1
denovo851	0	0	0	0	0	1	0	0	0	0	0	0	0	0	0	1	0	0	0	0	0	0	0	0	0	2	0	0	0	0	2	0	0	0	0	0	0	0	0	0	0	0	0	0	0	0	0	0	0
denovo852	0	0	0	0	0	0	0	0	0	0	0	0	0	0	0	0	1	0	0	0	0	1	0	0	0	0	0	0	0	0	0	0	0	0	0	0	0	0	1	0	0	0	0	0	0	0	0	0	0
denovo855	0	0	0	0	0	0	0	0	0	3	1	2	0	0	0	0	0	0	0	0	0	0	0	0	0	0	0	0	0	0	0	0	0	0	0	0	0	0	1	0	0	0	0	0	1	0	2	0	0
denovo858	0	0	0	0	0	0	0	0	0	0	0	0	0	0	0	0	0	0	0	0	0	0	0	0	0	0	0	0	0	0	0	0	0	0	0	0	0	0	0	0	0	0	0	0	0	0	0	0	0
denovo859	0	0	1	3	0	0	0	1	0	0	0	0	0	1	0	0	0	0	0	0	3	0	0	0	1	0	0	3	5	3	0	0	0	0	0	0	0	0	0	0	0	0	0	4	0	0	0	0	0
denovo861	0	0	0	0	0	0	0	0	0	0	0	0	0	0	0	0	0	0	0	0	0	0	0	0	0	0	0	0	0	0	0	0	0	0	0	0	0	0	0	0	0	0	0	0	0	0	0	0	0
denovo862	0	0	0	0	0	0	0	0	0	1	0	0	0	5	0	22	1	0	0	1	0	2	3	0	0	0	0	0	0	0	0	0	0	0	0	0	0	0	2	0	0	0	0	0	0	0	0	0	0
denovo864	0	0	0	2	1	0	0	0	0	0	0	0	0	0	0	0	0	0	0	0	0	0	0	0	0	0	0	1	0	0	0	0	0	0	1	0	0	0	0	0	0	0	0	0	0	0	0	0	4
denovo866	0	0	0	1	0	0	0	0	0	0	0	0	0	0	0	0	0	1	0	0	0	0	0	0	0	0	0	0	0	0	0	0	0	0	0	0	0	0	0	0	0	0	0	0	0	0	0	0	0
denovo867	0	0	0	0	2	0	0	0	0	0	0	0	0	0	0	1	2	1	0	2	0	0	0	0	0	0	0	0	0	0	0	1	0	0	0	0	0	0	0	0	0	0	0	0	0	0	0	0	0
denovo868	0	0	0	0	0	0	0	0	0	0	0	0	0	0	0	0	0	0	0	0	0	0	0	0	0	0	0	0	0	0	0	0	0	0	0	0	0	0	0	0	0	0	0	0	0	0	0	0	0
denovo869	0	0	0	1	0	0	0	0	0	0	0	0	0	0	0	0	0	0	0	0	1	0	0	0	0	0	0	0	0	0	0	0	0	0	0	0	0	0	0	0	0	0	0	0	0	0	0	0	0
denovo870	0	0	0	0	0	0	0	0	0	0	0	0	0	0	0	0	0	0	0	0	0	0	0	0	0	0	0	1	0	0	0	0	0	0	0	0	0	0	1	0	0	0	0	0	0	0	0	0	0
denovo871	0	0	0	0	0	0	0	0	0	0	0	0	0	0	0	0	0	0	0	0	0	0	0	0	0	0	0	1	0	0	0	0	0	0	0	0	0	0	0	0	0	0	0	0	0	0	0	0	0
denovo872	0	0	0	0	0	0	0	0	0	0	0	0	0	0	0	0	0	0	0	0	0	0	0	0	0	0	0	0	0	0	0	0	0	0	0	0	0	0	0	0	0	0	0	0	0	0	0	0	0
denovo873	1	0	1	0	5	13	4	6	1	1	0	2	0	1	2	0	1	0	0	0	1	0	2	0	0	7	4	0	0	3	3	0	0	3	3	0	1	0	5	3	0	3	1	0	0	0	0	5	7
denovo874	1	0	0	0	0	0	0	0	0	0	0	2	0	0	0	0	0	1	0	0	0	0	0	1	0	0	0	0	0	0	0	0	0	0	0	0	0	0	0	0	0	0	0	0	0	0	0	0	0
denovo877	0	0	1	0	0	0	0	0	0	0	1	0	0	0	0	0	0	0	0	0	0	0	0	0	0	0	0	0	0	0	0	0	0	0	0	0	0	0	0	0	0	0	0	0	0	0	0	0	0
denovo878	0	0	1	0	0	0	0	0	0	0	0	0	0	0	0	0	0	0	0	0	0	0	0	0	0	0	0	0	0	0	0	0	0	0	1	0	0	0	0	0	0	0	0	0	0	0	0	0	0
denovo879	0	0	0	0	2	0	0	0	0	0	0	0	0	0	0	0	0	1	1	0	0	0	0	0	0	0	0	0	0	1	0	0	0	0	0	3	0	0	0	0	0	0	0	0	0	1	1	1	0
denovo881	0	0	0	0	0	0	2	0	0	2	0	0	0	1	0	0	0	0	1	0	0	1	1	2	0	0	2	0	0	0	0	0	0	0	1	2	0	0	3	0	0	0	0	0	0	0	0	0	0
denovo882	0	0	0	4	0	0	2	3	2	1	0	6	15	9	1	13	3	3	13	4	1	3	1	3	0	1	1	7	5	0	0	0	0	1	0	1	0	0	24	0	2	2	6	4	0	4	0	0	3
denovo883	3	2	1	0	11	0	0	1	1	1	1	2	0	0	2	0	1	7	1	0	0	0	0	0	0	0	0	0	0	2	0	1	0	0	0	0	0	0	0	0	0	1	0	0	0	0	0	0	0
denovo884	0	0	0	5	0	0	0	0	0	3	0	7	1	1	0	6	3	2	3	0	1	2	1	3	0	0	1	1	0	0	0	0	0	0	0	0	0	0	3	0	0	0	0	1	0	0	0	0	0
denovo885	151	19	23	11	30	20	0	14	55	267	61	94	85	36	93	94	57	40	72	31	15	61	25	27	27	104	61	160	45	52	24	27	18	1	7	16	14	13	149	20	55	16	15	45	11	12	2	2	49
denovo888	0	0	1	0	0	0	1	0	0	0	0	0	0	0	0	0	0	0	0	0	0	0	0	0	0	0	0	0	0	0	0	0	0	0	0	0	0	0	1	0	0	0	0	0	0	0	0	0	0
denovo889	0	0	0	0	1	1	0	0	0	0	0	2	2	0	0	0	0	0	0	0	0	0	0	0	0	0	0	3	6	1	1	0	0	0	2	0	3	0	0	1	0	2	0	0	2	0	1	1	0
denovo890	0	0	0	0	0	0	0	0	0	0	0	0	0	0	0	0	0	0	0	0	2	0	0	0	0	0	0	0	0	0	0	0	0	0	0	0	0	0	0	0	0	0	0	0	0	0	0	0	0
denovo891	4	0	2	1	5	0	0	0	3	5	0	3	0	6	4	2	4	5	6	1	3	7	0	8	0	2	5	2	6	13	0	4	0	0	8	7	0	0	4	4	0	5	0	1	0	2	0	0	1
denovo892	0	0	0	1	0	0	0	0	0	0	0	0	0	0	0	0	0	0	0	0	1	0	0	0	0	0	0	0	0	0	0	0	0	0	0	0	0	0	0	0	0	0	0	0	0	0	0	0	0
denovo893	0	0	0	0	1	0	0	0	0	0	0	10	4	0	3	1	2	0	1	0	1	0	0	0	0	0	0	0	1	1	0	0	0	0	0	0	0	0	1	0	0	0	0	1	0	0	0	0	0
denovo897	0	0	0	0	2	0	0	1	0	1	0	0	0	0	0	0	1	0	0	0	0	1	0	0	0	0	0	1	1	0	0	0	0	0	0	0	0	0	0	0	0	1	0	3	0	0	1	1	0
denovo899	0	0	0	0	0	0	0	0	0	0	0	0	0	0	0	0	0	0	0	0	0	2	0	0	0	0	0	0	0	0	0	0	0	0	0	0	0	0	0	0	0	0	0	0	0	0	0	0	0
denovo901	1	0	0	0	1	0	0	0	0	0	0	0	2	0	0	0	0	1	0	0	1	1	0	0	0	0	0	0	4	0	0	0	0	0	0	0	0	0	0	0	0	0	0	0	0	0	0	0	0
denovo903	0	0	0	1	0	0	0	0	0	0	0	0	0	0	0	0	0	0	0	0	0	0	0	0	0	0	0	0	0	0	0	0	0	0	0	0	0	0	0	0	0	0	0	0	0	0	0	0	0
denovo905	0	0	0	0	0	0	0	0	0	0	0	0	0	0	0	0	0	0	0	0	0	0	0	0	0	0	0	0	0	0	0	0	0	0	0	0	0	0	0	0	0	0	0	0	0	0	0	0	0
denovo906	0	0	0	0	0	0	0	0	0	0	0	0	0	0	0	0	0	0	0	0	0	0	0	0	0	0	0	0	0	0	0	0	1	0	0	0	0	0	0	0	0	0	0	0	0	0	0	0	0
denovo907	1	1	2	0	1	0	0	0	1	0	1	6	0	1	0	2	0	0	0	0	0	0	0	2	0	0	0	0	0	0	1	0	0	0	1	0	0	0	0	0	0	0	0	0	0	1	0	0	0
denovo909	0	0	0	2	0	0	0	0	0	0	0	0	0	0	0	0	0	0	0	0	1	0	0	0	0	0	0	0	0	0	0	0	0	0	0	0	0	0	0	0	0	0	0	0	0	0	0	0	0
denovo910	0	0	0	0	0	0	0	0	0	0	0	1	1	0	0	0	0	0	0	0	0	0	4	0	0	3	0	0	0	0	0	0	0	0	0	0	1	0	0	0	0	0	0	0	1	0	0	0	0
denovo911	0	1	3	0	17	4	3	13	0	3	1	6	6	10	2	2	1	4	10	3	0	8	0	5	14	9	5	7	3	10	0	1	0	3	8	2	0	0	3	3	2	3	2	7	0	10	3	9	14
denovo912	0	0	0	0	1	0	0	0	0	0	0	0	0	0	0	0	0	0	0	0	0	0	0	0	0	0	0	0	0	1	0	0	0	0	0	0	0	0	0	0	0	0	0	0	1	0	0	0	0
denovo913	0	0	0	0	0	0	0	1	1	0	0	0	0	0	0	0	0	0	2	0	0	2	0	1	0	0	0	0	0	0	0	0	0	0	2	1	0	0	0	0	0	0	0	0	2	0	0	0	0
denovo914	1	0	0	0	2	0	0	0	0	0	0	0	0	0	0	0	0	0	0	0	0	0	0	0	0	0	0	0	0	0	0	0	0	0	0	0	0	0	0	0	0	0	0	0	0	0	0	0	1
denovo915	0	0	1	1	5	0	4	4	1	0	1	0	0	21	0	15	37	0	57	14	0	12	3	2	12	0	3	3	16	0	0	2	0	1	5	0	0	1	10	1	2	1	0	15	0	3	0	3	0
denovo917	0	0	0	0	0	0	0	0	0	0	0	0	0	0	0	0	1	0	0	0	0	2	0	0	0	0	0	0	0	0	0	0	0	0	0	0	0	0	0	0	0	0	0	2	0	0	0	0	0
denovo920	0	1	0	0	2	0	1	0	2	1	0	0	0	0	0	0	0	0	0	0	0	0	0	0	0	2	0	0	0	1	1	0	0	2	2	0	0	0	0	0	0	0	0	0	1	0	0	1	6
denovo921	1	0	2	0	1	5	0	2	5	0	0	1	0	0	0	0	0	0	1	0	0	0	0	0	0	2	0	0	0	1	1	0	1	0	2	2	4	0	0	3	0	2	1	0	3	0	1	0	0
denovo923	1	0	1	0	0	0	0	0	0	2	0	0	0	0	0	11	2	0	4	0	0	0	0	1	2	0	1	4	0	0	0	0	0	0	0	5	0	2	0	0	2	1	0	0	0	0	0	0	0
denovo924	2	3	0	1	5	2	0	4	4	4	0	9	0	3	1	2	0	3	4	0	0	0	0	1	0	4	0	8	7	13	5	0	0	2	3	0	3	3	0	2	3	1	1	2	4	3	0	1	3
denovo926	0	0	0	0	0	0	0	0	0	0	0	0	0	0	0	0	0	0	0	0	1	0	0	0	0	0	0	0	0	0	0	0	0	0	0	0	0	0	0	0	0	0	0	0	0	0	0	0	0
denovo927	0	0	0	0	0	0	0	0	0	0	0	0	0	0	0	1	1	0	2	0	0	0	0	0	1	0	0	0	0	0	0	0	2	0	0	0	0	0	1	0	0	0	0	0	0	0	0	1	0
denovo928	0	0	0	1	0	0	0	0	0	5	0	0	0	12	0	19	19	10	6	14	1	7	0	10	8	0	0	11	7	0	0	0	0	0	0	1	0	0	14	0	3	0	0	14	1	0	0	0	0
denovo929	0	0	0	5	0	0	0	0	0	0	0	0	0	0	0	1	0	0	1	0	1	0	0	0	0	0	0	0	0	0	0	0	0	0	0	0	0	0	0	0	0	0	0	0	0	0	0	0	0
denovo930	0	0	0	0	0	0	0	0	0	0	0	0	0	0	0	0	0	0	0	0	0	0	0	0	0	0	0	0	0	0	0	0	0	0	0	0	0	0	0	0	0	0	0	0	0	0	0	0	0
denovo931	0	0	2	0	46	2	27	13	0	7	0	15	8	2	3	0	0	0	6	0	0	1	0	0	0	0	5	1	1	39	1	0	2	26	7	1	0	0	1	16	0	13	9	0	3	29	0	1	1
denovo933	0	0	0	0	2	0	0	0	0	0	0	0	0	0	0	0	0	1	0	1	0	0	0	0	0	0	0	0	0	2	0	0	0	0	1	3	0	0	2	0	0	0	0	0	0	0	0	0	1
denovo934	0	0	0	0	0	0	0	0	0	0	0	0	0	0	0	0	0	0	0	0	0	0	0	0	2	0	0	0	0	0	0	0	0	0	0	0	0	0	0	0	0	0	0	0	0	0	0	0	0
denovo935	0	1	0	0	2	0	0	0	0	1	0	1	0	0	2	0	1	1	0	0	0	0	0	1	0	0	2	0	0	0	0	0	3	0	2	2	0	0	0	0	0	0	0	0	0	3	0	0	0
denovo937	0	0	0	0	0	0	0	0	0	0	0	0	0	0	0	0	0	1	0	0	0	0	0	0	0	0	0	0	0	0	0	0	0	0	0	0	0	0	0	0	0	0	0	0	0	0	0	0	0
denovo940	6	1	4	0	19	10	3	2	22	1	0	2	0	0	4	0	0	0	0	0	0	1	0	0	0	6	0	0	0	3	7	0	3	4	3	1	6	0	0	7	0	4	2	0	2	1	2	4	10
denovo942	1	0	0	0	0	0	0	0	0	0	0	2	0	0	1	0	0	0	0	0	0	0	0	0	0	0	0	0	0	2	0	0	0	0	0	0	0	0	0	0	0	0	0	0	0	0	0	0	0
denovo943	0	0	0	0	0	0	0	0	0	0	0	0	0	0	0	0	0	0	0	0	0	0	0	0	0	0	0	0	0	0	0	0	0	0	0	0	0	0	0	0	0	0	0	0	0	0	0	0	0
denovo945	0	0	2	0	2	0	3	0	0	0	0	0	0	0	0	0	2	1	0	2	0	1	0	0	0	0	1	1	0	0	0	0	0	0	1	0	0	0	0	1	0	0	0	0	0	1	0	0	0
denovo946	0	0	2	0	0	0	0	0	0	0	0	0	1	0	0	0	1	0	0	1	0	1	0	0	0	0	0	0	0	0	0	1	0	0	0	0	0	0	2	0	0	0	0	0	0	0	0	0	4
denovo947	0	0	0	0	0	0	1	0	0	0	0	0	0	0	0	0	0	0	0	0	0	0	0	0	0	0	0	0	0	0	0	0	0	0	0	0	0	0	0	0	0	0	0	0	0	0	0	0	0
denovo948	0	0	0	0	0	0	0	0	0	0	0	0	0	0	0	0	0	0	0	0	0	0	0	0	0	0	0	0	0	0	0	0	0	0	0	0	0	0	0	0	0	1	0	0	0	0	0	0	0
denovo949	0	2	1	0	0	1	0	0	1	0	0	0	0	0	0	0	0	0	0	0	0	0	0	0	0	0	0	0	0	1	0	0	0	0	0	0	1	0	0	0	0	0	0	0	0	0	0	0	0
denovo950	0	0	0	0	0	0	1	0	0	0	0	0	0	0	0	0	0	0	0	0	0	0	0	0	0	0	0	0	0	0	0	0	1	0	0	0	0	0	0	0	0	0	0	0	0	0	0	0	0
denovo951	0	0	0	0	0	0	0	0	0	0	0	0	0	0	0	0	0	0	0	0	0	0	0	0	0	0	0	0	0	0	0	0	2	0	0	0	0	0	0	0	0	0	0	0	0	0	0	0	0
denovo953	0	4	0	0	1	4	1	0	7	0	0	4	0	0	4	1	0	1	0	0	0	0	0	0	0	0	0	0	0	0	0	0	0	0	0	0	2	1	2	0	0	0	0	1	0	0	0	0	0
denovo954	0	0	0	0	0	0	0	1	0	0	0	0	0	0	0	0	0	0	0	0	0	0	1	0	0	0	0	0	0	0	0	0	0	0	0	0	0	0	0	0	0	0	0	0	0	0	1	0	0
denovo957	1	0	0	0	1	0	1	0	0	0	1	0	0	0	0	0	0	0	0	0	0	1	0	0	0	0	0	0	0	0	0	0	0	0	2	0	0	0	0	1	0	0	2	0	3	1	2	0	1
denovo958	1	0	0	0	7	1	1	1	3	1	0	1	1	3	2	1	0	3	8	0	1	2	1	1	0	13	1	1	0	1	1	0	2	2	3	2	5	0	2	2	0	1	0	0	0	0	1	2	4
denovo960	0	0	0	0	0	0	0	0	0	0	0	0	0	0	0	0	0	0	0	0	0	0	1	0	0	0	0	0	0	1	0	0	0	0	0	0	0	0	2	0	0	0	0	0	0	0	0	0	0
denovo961	0	0	0	10	0	0	0	0	0	0	0	0	0	0	0	0	0	0	0	0	0	0	0	0	0	0	0	0	0	0	0	0	0	0	0	0	0	0	0	0	0	0	0	0	0	0	0	0	0
denovo962	0	0	0	0	0	0	0	0	0	0	0	0	0	0	0	0	0	0	1	0	0	0	0	0	0	0	2	1	0	0	0	0	0	0	0	0	0	0	0	0	0	0	0	0	0	0	0	0	0
denovo963	0	0	0	8	0	0	0	0	0	0	0	0	0	0	0	0	0	0	0	0	8	0	0	0	0	0	0	0	0	0	0	0	0	0	0	0	0	0	0	0	0	0	0	0	0	0	0	0	0
denovo965	0	0	0	0	0	0	2	0	0	0	0	0	0	0	0	0	0	0	0	0	0	0	0	0	0	0	0	0	0	0	0	0	0	0	0	0	0	0	0	0	1	1	0	0	0	1	0	0	0
denovo966	0	0	0	0	3	0	0	1	0	0	0	1	0	0	0	0	0	0	0	0	0	0	0	0	0	0	0	0	0	1	0	0	0	1	2	0	0	0	0	2	0	0	0	0	0	1	1	0	0
denovo967	0	0	0	0	0	0	0	0	0	0	0	0	0	0	0	0	0	0	0	0	0	0	0	0	0	0	0	0	0	2	0	0	0	0	0	0	0	0	0	0	0	0	0	0	0	0	0	0	0
denovo968	33	4	11	0	11	0	0	3	7	6	5	10	1	7	6	6	0	5	5	0	5	5	0	3	3	2	3	4	0	5	1	4	9	4	14	1	1	6	8	5	2	6	1	0	4	2	5	5	0
denovo969	0	0	1	0	3	0	0	0	0	0	0	0	0	0	0	0	0	0	0	0	0	0	0	0	0	0	0	0	0	2	0	0	0	0	0	0	0	0	0	1	0	0	0	0	0	2	1	0	0
denovo970	0	0	0	0	0	0	0	0	0	0	0	3	0	1	0	0	0	1	0	0	0	0	1	0	1	0	0	1	0	0	0	0	0	0	0	0	0	0	0	0	0	0	0	0	0	0	0	0	0
denovo971	0	0	0	0	0	0	0	0	0	70	0	0	0	0	0	0	0	5	0	0	0	0	2	6	0	0	2	109	0	0	0	0	0	0	0	0	0	0	0	0	51	0	0	2	0	0	0	0	0
denovo972	2	1	0	0	11	0	4	2	0	0	0	1	0	1	2	0	1	2	0	0	0	2	0	0	0	0	2	1	0	5	1	0	10	0	3	0	1	0	0	1	0	0	0	0	3	1	1	2	0
denovo973	0	0	0	0	0	0	0	0	0	0	0	0	0	0	0	0	0	0	0	0	0	0	0	0	0	0	0	0	0	0	0	0	0	0	0	0	0	0	0	0	0	0	0	0	0	0	0	0	0
denovo974	0	0	0	0	0	0	2	0	0	0	0	0	0	0	0	0	0	0	0	0	0	0	0	0	0	0	0	0	0	0	0	0	0	0	0	0	0	0	0	0	0	0	0	0	0	0	0	0	0
denovo975	0	0	0	0	0	0	0	0	0	0	0	0	0	0	0	0	0	0	0	0	0	0	0	0	0	0	0	0	0	0	0	0	0	0	0	0	0	0	1	0	0	0	0	0	0	0	0	0	0
denovo976	0	0	0	0	0	0	0	0	0	0	3	0	2	0	14	0	0	0	0	0	0	0	0	0	0	0	0	0	0	0	0	0	1	0	0	0	0	0	0	0	0	0	0	0	0	0	0	0	0
denovo977	0	0	0	0	0	0	1	0	0	0	0	0	0	0	0	0	8	1	1	0	0	0	2	0	3	0	1	8	0	0	0	0	0	0	0	0	0	0	4	0	0	1	0	1	0	0	0	0	0
denovo978	0	0	0	5	1	0	0	0	0	0	2	3	1	1	0	0	1	0	3	0	1	0	0	1	1	0	0	0	0	0	5	0	0	0	0	0	0	2	0	0	0	1	0	0	1	0	0	0	0
denovo979	0	0	0	0	1	0	0	0	1	0	0	0	0	0	0	0	0	0	0	0	0	0	0	0	0	0	0	0	0	0	0	0	0	0	0	0	0	0	0	1	0	1	0	0	0	0	0	0	0
denovo980	0	0	0	0	0	0	0	0	0	0	0	0	0	0	0	1	2	12	1	0	1	1	0	4	0	0	0	0	0	0	0	5	0	0	0	0	0	0	0	0	2	0	0	1	0	0	0	0	0
denovo982	0	0	0	0	0	0	0	0	0	0	0	0	0	0	0	0	0	0	0	0	0	0	0	0	0	0	0	0	0	0	0	0	0	0	2	0	0	0	0	0	0	0	0	0	0	0	0	0	0
denovo983	1	0	0	1	3	0	0	0	0	2	0	3	2	1	0	0	3	6	2	2	0	1	2	1	2	0	1	5	2	7	1	0	1	3	2	1	0	0	1	0	0	1	0	3	0	1	0	1	0
denovo984	0	0	0	0	3	0	0	0	0	0	0	0	0	0	0	3	1	1	1	0	0	0	0	0	0	0	0	0	0	0	0	0	0	0	0	0	0	0	2	0	0	0	0	0	0	1	0	0	1
denovo985	2	0	0	0	0	0	0	1	0	2	2	2	1	0	1	1	0	0	1	0	0	0	0	0	0	0	0	0	0	4	0	0	0	0	1	1	0	0	0	1	1	0	0	0	2	0	0	1	0
denovo986	0	0	0	0	0	0	0	0	0	0	0	0	0	0	0	1	0	0	0	0	0	0	0	0	0	0	0	0	0	0	0	0	0	0	0	0	0	0	1	0	0	0	0	0	0	0	0	0	0
denovo987	1	0	1	0	12	1	9	12	2	7	0	4	2	11	1	7	5	1	9	3	0	7	0	0	13	2	3	2	1	10	2	0	0	7	5	3	1	1	13	1	0	9	2	1	0	30	0	1	4
denovo988	0	0	0	2	0	0	0	0	0	0	0	0	0	0	0	0	0	0	0	0	1	0	0	0	0	0	0	0	0	0	0	0	0	0	0	0	0	0	0	0	0	0	0	0	0	0	0	0	0
denovo989	0	0	0	0	0	0	0	0	0	0	0	0	0	0	0	0	2	0	0	0	0	1	0	0	6	0	0	2	2	0	0	0	0	0	0	0	0	0	0	0	0	0	0	0	0	0	0	0	0
denovo991	0	0	0	0	0	0	0	0	0	1	0	0	0	0	0	1	0	0	0	0	0	0	0	0	0	0	0	0	0	0	0	0	0	0	0	0	0	0	0	0	0	0	0	0	0	0	0	0	0
denovo992	0	0	0	0	0	0	0	0	0	0	0	0	0	0	0	0	0	9	1	0	0	1	0	14	4	0	1	43	1	0	0	0	0	0	0	0	0	0	0	0	3	0	0	0	0	0	0	0	0
denovo993	24	23	10	0	23	8	9	11	20	12	9	7	13	6	33	5	2	8	3	3	1	4	4	3	0	7	8	2	1	29	1	0	6	3	13	6	4	1	7	7	1	3	3	0	13	2	14	11	1
denovo994	0	0	0	0	0	0	0	0	0	0	1	0	0	0	0	0	0	0	0	1	0	0	0	0	0	0	0	1	0	0	0	0	0	0	0	0	0	0	1	0	0	0	0	0	0	0	0	0	0
denovo995	0	0	0	0	0	0	0	0	0	0	0	0	0	0	0	0	0	0	0	0	0	0	0	0	0	0	0	0	0	0	0	0	0	0	0	0	0	0	0	0	0	0	0	0	0	0	0	0	0
denovo996	0	0	0	0	0	0	1	0	0	0	0	0	0	0	0	0	0	0	0	0	0	0	0	1	0	0	0	0	0	1	0	0	1	0	1	1	1	0	0	0	0	0	0	0	0	0	0	0	0
denovo998	0	0	0	2	1	0	0	0	0	0	0	0	0	0	0	1	3	0	1	0	0	0	0	0	1	2	0	0	1	0	0	0	0	0	0	0	0	0	0	0	0	0	0	0	0	0	0	0	0
denovo999	6	1	3	1	22	6	6	1	5	2	1	13	10	1	7	0	1	3	1	1	0	0	1	1	11	17	2	1	1	10	5	6	25	1	2	2	9	5	0	3	0	1	0	4	2	7	2	0	2
denovo1000	0	0	0	0	0	0	0	0	0	0	0	0	0	0	0	0	0	0	1	0	1	0	0	0	1	0	1	0	0	0	0	0	0	0	0	0	0	0	0	0	0	0	0	0	0	0	0	0	0
denovo1001	0	0	0	0	0	0	0	0	0	0	0	0	0	0	0	0	0	0	0	0	0	0	0	0	0	0	0	0	0	0	0	0	0	0	0	0	0	0	0	0	0	0	0	0	0	0	0	0	0
denovo1002	3	1	0	0	0	0	0	0	0	1	0	6	1	0	0	0	0	0	0	0	0	0	0	0	0	0	0	0	0	0	0	0	0	0	1	0	0	0	0	0	0	0	0	0	0	0	0	0	0
denovo1003	0	0	0	0	0	0	0	0	0	0	0	0	0	1	0	0	0	0	0	0	0	0	0	0	0	0	0	0	0	0	0	0	0	0	0	0	0	0	1	0	0	0	0	0	0	0	0	0	0
denovo1004	1	0	0	0	0	0	0	0	0	0	0	0	0	0	0	0	0	0	0	0	0	0	0	0	0	0	0	0	0	0	0	0	0	0	0	0	0	0	0	0	0	0	0	0	0	0	0	0	0
denovo1005	0	0	2	0	4	1	0	0	4	2	1	2	0	0	0	0	0	0	0	0	0	0	0	0	0	1	1	2	0	2	2	0	0	2	0	2	2	0	0	3	0	0	4	0	0	1	0	0	9
denovo1006	0	0	0	0	0	0	0	0	0	0	0	0	0	1	0	0	0	0	0	0	2	0	0	0	0	0	0	0	0	0	0	0	0	0	0	0	0	0	1	0	0	0	0	0	0	0	0	0	0
denovo1007	0	0	0	0	0	0	0	0	2	0	0	0	1	0	0	0	0	0	0	0	0	0	0	0	0	3	0	0	0	0	0	0	0	0	0	0	0	0	0	0	0	0	0	0	0	0	0	0	0
denovo1008	0	0	0	0	0	0	0	0	0	0	0	0	0	0	0	0	0	0	0	0	0	0	0	0	0	0	0	0	0	0	0	0	1	0	0	0	0	0	0	0	0	0	0	0	0	0	0	0	0
denovo1009	0	0	0	0	0	0	0	0	0	0	0	1	0	6	0	2	0	0	4	0	0	0	1	0	2	0	3	1	2	0	0	1	0	0	0	0	0	0	2	0	0	0	0	1	0	0	0	0	0
denovo1012	0	0	0	0	0	0	0	0	0	0	0	0	0	0	0	0	0	0	0	0	0	0	0	0	0	0	0	2	0	0	0	0	0	0	0	0	0	0	0	0	0	0	0	0	0	0	0	0	0
denovo1013	0	0	1	0	0	0	0	0	0	0	0	0	0	0	0	0	0	0	0	0	0	0	0	0	0	0	0	0	0	0	0	0	0	0	0	0	0	0	0	0	0	0	0	0	0	0	0	0	0
denovo1014	1	0	3	0	1	2	2	6	1	2	0	0	9	4	2	6	0	2	7	0	0	2	1	10	0	4	1	4	2	1	9	2	0	1	0	3	4	2	4	0	2	1	8	6	1	0	2	0	8
denovo1015	0	0	0	0	0	0	0	0	0	0	0	0	0	0	0	0	0	0	0	0	0	0	0	0	0	0	0	0	0	0	0	0	0	0	0	0	0	0	0	0	0	0	0	0	0	0	0	3	0
denovo1016	0	0	0	0	0	0	0	0	0	0	0	0	0	2	0	0	1	1	1	0	0	0	0	0	0	0	0	0	0	0	0	0	0	0	0	0	0	0	0	0	0	0	0	0	0	0	0	0	0
denovo1017	2	0	0	0	0	0	0	0	0	0	0	0	0	0	0	0	0	0	0	0	0	0	0	0	0	0	0	0	0	0	0	0	0	0	0	0	0	0	0	0	0	0	0	0	0	0	0	0	0
denovo1018	2	0	0	0	0	0	0	0	0	0	0	0	0	0	0	0	0	0	0	0	0	0	0	0	0	0	0	0	0	0	0	0	0	0	0	0	0	0	0	0	0	0	0	0	0	0	0	0	0
denovo1019	0	0	1	0	0	3	0	0	0	3	0	4	3	1	1	2	4	1	0	2	0	1	1	3	1	1	0	15	0	2	1	0	0	0	0	0	0	0	1	0	2	1	0	1	0	0	0	0	0
denovo1020	2	1	1	5	5	3	8	5	2	2	0	0	2	1	1	4	3	10	7	1	0	2	0	8	4	6	2	2	3	1	0	0	0	6	3	4	5	0	2	3	2	3	0	5	0	9	0	2	0
denovo1021	0	0	0	2	0	0	0	0	0	0	0	0	0	0	0	0	0	0	0	0	0	0	0	0	0	0	0	0	0	0	0	0	0	0	0	0	0	0	0	0	0	0	0	0	0	0	0	0	0
denovo1022	1	0	0	0	0	0	0	0	2	0	0	0	0	0	1	0	0	0	0	0	0	0	0	0	0	0	0	0	0	1	0	0	0	0	0	0	1	1	0	1	0	0	0	0	0	0	0	0	0
denovo1023	0	0	0	0	0	0	1	0	0	0	0	0	0	0	0	0	0	1	0	0	0	0	0	0	0	0	0	2	0	0	0	0	0	0	0	0	0	0	0	0	0	0	0	0	0	0	0	0	0
denovo1024	0	0	0	2	0	0	0	0	0	0	1	0	0	0	0	0	0	0	0	0	1	0	0	0	0	0	0	0	0	0	0	0	6	0	0	0	0	0	0	0	0	0	0	0	0	0	0	0	0
denovo1025	0	0	1	0	3	2	0	4	1	8	4	2	2	8	5	4	1	0	5	1	0	2	3	0	4	1	2	4	1	0	0	2	0	0	6	1	0	0	10	0	0	1	0	0	2	3	2	3	0
denovo1026	0	0	0	0	0	0	0	0	0	0	0	1	0	0	0	0	0	0	0	0	0	0	0	0	0	0	0	0	0	0	0	2	0	0	0	0	0	0	0	0	0	0	0	0	0	0	0	0	0
denovo1030	2	0	0	0	1	0	0	1	0	0	0	0	0	0	0	0	0	0	0	1	0	0	0	0	0	0	0	0	0	0	0	0	0	0	4	0	0	0	0	0	0	0	1	0	0	0	0	0	0
denovo1031	0	0	0	0	0	0	0	0	0	0	0	0	0	0	0	0	0	0	0	0	0	0	0	0	0	0	0	0	0	0	0	0	0	0	0	0	0	0	0	0	0	0	0	0	0	0	0	0	0
denovo1032	0	0	0	0	0	0	0	0	0	0	0	0	0	1	0	0	0	0	0	0	0	0	0	0	0	0	0	0	0	0	0	0	1	0	0	0	0	0	0	0	0	0	0	0	0	0	0	0	0
denovo1033	0	1	5	0	0	1	0	6	2	2	0	0	1	3	1	1	0	0	1	1	0	1	0	0	1	0	0	0	0	0	0	0	3	0	0	0	1	0	0	1	0	2	0	1	0	3	0	0	1
denovo1034	0	0	0	0	0	0	0	0	0	0	0	2	0	1	0	0	0	0	0	0	0	0	0	0	0	0	0	0	0	1	0	0	4	0	0	0	0	0	0	0	0	0	0	1	0	0	0	0	0
denovo1035	0	0	0	0	0	0	0	0	0	0	1	0	0	0	0	0	0	0	0	0	0	0	0	0	1	0	0	1	0	0	0	0	0	0	0	0	0	0	0	0	0	0	0	0	1	0	0	0	0
denovo1036	0	0	0	0	0	0	0	0	0	0	0	0	0	0	0	0	0	0	0	0	0	0	0	0	1	0	0	0	0	0	0	0	0	0	0	0	0	0	0	2	0	0	0	0	0	0	0	0	0
denovo1037	1	0	0	0	1	2	0	0	0	1	0	1	0	0	0	0	0	0	1	0	0	1	0	0	0	0	0	0	0	0	0	0	0	1	1	0	0	0	0	0	0	0	0	0	0	2	0	0	0
denovo1038	0	0	0	0	0	0	0	0	0	0	0	0	0	0	0	0	0	0	1	0	0	0	0	0	0	0	0	0	0	0	0	0	0	0	0	0	0	0	0	0	0	0	0	0	0	0	0	0	0
denovo1039	0	0	0	0	0	0	0	0	1	0	0	0	0	0	0	0	0	0	0	0	0	0	0	0	0	0	0	0	0	0	0	0	0	0	0	0	0	0	0	0	0	0	0	0	0	0	0	0	1
denovo1040	0	0	0	0	0	0	0	0	0	0	0	0	0	2	0	0	0	0	0	0	0	0	0	0	0	0	0	0	0	0	0	0	0	0	0	0	0	0	0	0	0	0	0	0	0	0	0	0	0
denovo1041	1	3	0	0	7	0	4	7	3	2	1	5	0	3	0	2	1	0	3	0	0	4	0	2	0	29	7	1	0	6	2	2	2	2	4	3	4	4	1	2	2	4	1	0	8	10	1	1	3
denovo1042	2	1	0	0	7	2	3	8	0	0	0	0	0	0	0	0	0	0	0	0	0	0	0	0	1	9	0	0	0	2	11	0	0	9	1	0	0	1	0	1	0	1	21	1	3	0	2	1	4
denovo1043	0	0	0	0	0	0	0	0	0	0	0	0	2	0	0	0	0	0	0	0	0	0	0	0	0	0	0	0	0	0	0	0	0	0	0	0	0	0	2	0	0	0	0	0	0	0	0	0	0
denovo1044	0	0	0	0	0	0	0	0	0	0	0	0	0	0	0	0	0	0	0	0	0	0	0	0	0	0	0	0	2	0	0	0	0	0	0	0	0	0	0	0	0	0	0	0	0	0	0	0	0
denovo1045	0	0	0	0	0	0	0	0	0	0	3	0	5	0	0	2	0	0	0	0	0	0	0	0	1	0	0	1	0	0	0	0	0	0	0	1	0	0	0	0	0	0	0	0	0	0	0	0	0
denovo1047	0	0	0	0	2	0	6	3	0	0	0	1	0	0	0	0	0	0	0	0	0	0	0	0	0	0	0	0	0	2	0	0	0	0	0	0	0	0	0	1	0	1	0	0	0	0	2	8	1
denovo1048	0	0	0	0	0	0	1	2	0	0	0	0	1	5	0	2	5	2	7	1	0	3	0	1	0	0	0	1	3	0	0	3	0	1	0	0	0	0	3	0	0	1	0	0	0	0	0	0	0
denovo1049	0	0	1	0	0	0	0	0	0	0	0	0	3	4	0	1	0	0	0	0	0	1	0	0	1	0	0	2	0	0	0	0	0	0	0	0	0	0	1	0	0	0	0	0	0	0	0	0	0
denovo1050	0	0	0	0	0	0	0	0	0	0	0	0	0	0	0	0	0	7	0	0	7	0	0	0	0	0	0	0	0	0	0	0	0	0	0	0	0	0	0	0	0	0	0	0	0	0	0	0	0
denovo1052	0	0	2	0	0	1	11	17	2	4	2	2	10	2	2	2	11	0	2	1	0	2	1	1	1	0	0	0	6	1	0	0	2	2	5	1	0	0	9	0	0	6	6	3	0	2	2	0	1
denovo1053	0	0	0	0	0	0	0	0	0	0	0	0	0	0	0	0	4	4	0	0	0	1	0	1	1	0	0	0	0	0	0	0	0	0	0	0	0	0	0	0	0	0	0	0	0	0	0	0	0
denovo1056	1	0	0	0	0	0	0	0	1	0	1	4	0	5	1	1	0	0	0	1	0	0	0	0	0	7	0	1	0	3	0	0	1	0	0	0	0	1	1	0	0	0	0	0	0	0	0	0	0
denovo1057	1	0	1	0	0	0	1	3	1	1	0	0	0	1	0	0	0	0	0	0	0	1	0	0	0	2	0	0	0	0	0	0	0	0	0	0	0	0	0	0	0	0	1	2	1	0	1	2	1
denovo1058	0	0	0	0	0	0	1	0	0	0	0	0	0	0	0	0	0	0	0	0	0	0	0	0	0	0	0	0	0	0	0	0	0	0	0	0	0	0	0	0	0	0	0	0	0	0	0	0	0
denovo1059	0	0	1	0	2	0	2	2	0	6	0	0	3	1	0	0	0	1	1	0	0	0	0	1	0	0	1	7	0	0	0	1	0	0	0	0	0	0	0	1	2	1	0	0	0	0	0	0	0
denovo1060	0	0	0	0	0	0	0	0	0	0	0	0	0	0	0	0	0	0	0	0	0	0	0	0	0	0	0	0	0	0	0	0	0	0	0	0	0	0	3	0	0	0	0	0	0	0	0	0	0
denovo1061	0	0	0	0	0	0	0	0	0	0	0	0	0	0	0	0	0	0	0	0	0	0	0	0	0	0	0	0	0	0	0	0	0	0	0	0	0	0	0	0	0	0	0	0	0	0	0	0	0
denovo1062	0	0	1	0	2	0	0	1	1	0	0	1	1	0	0	0	0	0	0	0	0	0	0	1	0	0	2	0	0	0	0	0	0	0	0	0	0	0	0	0	0	0	1	0	0	0	0	0	0
denovo1063	0	0	0	0	1	0	1	0	0	0	0	0	0	0	0	0	0	0	0	0	0	0	0	0	0	0	0	0	0	0	0	0	0	0	0	0	0	0	0	0	0	0	0	0	0	0	0	0	0
denovo1064	0	0	0	0	0	0	0	0	0	0	0	0	0	0	0	0	0	0	0	0	0	0	0	0	0	0	0	0	0	0	0	0	0	0	0	0	0	0	0	0	0	1	0	0	0	0	0	0	0
denovo1065	0	0	0	5	0	0	0	0	0	0	0	0	0	0	0	0	0	8	0	0	6	1	0	1	0	0	0	1	0	0	0	0	0	0	0	0	0	0	0	0	0	0	0	0	0	0	0	0	0
denovo1066	2	2	1	0	0	14	0	0	2	0	2	1	0	0	1	0	0	0	0	0	0	0	0	0	0	15	0	0	0	0	1	0	1	1	0	0	1	2	0	3	0	0	0	0	0	1	0	0	2
denovo1071	0	0	0	1	0	0	2	0	0	0	0	0	1	0	0	0	0	0	1	0	0	0	1	1	0	3	0	0	0	0	0	0	0	0	1	0	0	0	0	1	0	1	1	0	0	0	0	0	0
denovo1072	0	0	0	0	0	0	0	0	0	0	0	0	0	0	0	0	0	0	0	0	0	0	0	0	0	0	0	0	0	0	0	0	0	0	0	0	0	0	0	0	0	0	0	0	0	0	0	0	0
denovo1073	0	0	0	0	1	0	1	0	0	0	0	0	0	0	0	0	0	0	0	0	0	0	0	0	0	0	0	0	0	0	0	0	0	0	1	0	0	0	0	0	0	0	0	0	0	0	0	0	0
denovo1074	662	357	1096	227	724	1241	232	1478	826	810	478	685	881	972	719	799	58	380	642	184	64	352	113	164	765	1159	159	677	290	632	346	104	249	596	496	332	285	266	567	451	351	872	1008	816	501	1017	412	381	1166
denovo1075	0	0	0	2	0	0	0	0	0	0	0	0	0	0	0	0	0	0	0	0	0	0	0	0	0	0	0	0	0	0	0	0	0	0	0	0	0	0	0	0	0	0	0	0	0	0	0	0	0
denovo1077	7	1	3	0	23	0	0	0	2	0	0	1	0	0	1	0	0	0	0	0	0	0	0	0	0	2	0	0	0	8	7	0	0	0	0	0	1	0	0	5	0	0	4	0	2	0	1	0	3
denovo1078	0	0	0	0	0	0	0	0	0	0	0	0	0	0	0	0	0	2	0	0	0	0	0	0	0	1	0	0	0	0	0	0	0	0	0	0	0	0	0	0	0	0	0	0	0	0	0	0	0
denovo1080	1	1	0	1	2	0	0	0	1	0	0	1	0	1	0	1	0	0	1	0	0	1	0	1	0	0	0	0	0	1	0	0	0	0	0	1	0	0	1	0	0	2	0	1	0	1	1	0	0
denovo1082	0	0	0	0	0	0	0	0	0	0	0	0	0	0	0	0	0	0	0	0	0	0	0	0	0	0	0	0	0	0	0	0	0	0	0	0	0	0	0	0	0	0	0	0	0	0	0	0	0
denovo1083	0	0	0	0	1	0	0	0	0	3	0	0	0	0	0	0	1	0	1	0	0	0	0	0	0	0	0	0	0	0	0	0	2	1	0	0	0	0	0	0	4	0	0	0	1	0	0	0	0
denovo1084	149	1	1	7	2	5	4	4	19	8	6	42	2	4	10	9	9	14	1	0	2	3	2	0	1	19	2	4	1	2	0	1	2	1	15	10	1	5	14	3	0	12	0	0	0	6	0	1	1
denovo1086	3	0	0	0	0	0	0	0	0	0	2	2	0	0	1	0	0	0	0	0	0	0	0	0	1	3	0	0	0	0	3	1	0	0	0	0	0	0	0	0	0	0	0	0	1	0	0	0	0
denovo1087	1	1	0	0	4	1	0	0	0	0	0	2	2	0	0	0	0	0	0	0	0	0	1	0	0	0	0	0	0	2	0	0	0	0	0	0	0	0	0	1	0	0	0	0	1	0	1	0	0
denovo1088	0	0	1	0	0	0	0	0	0	0	1	0	0	1	0	0	1	1	0	0	0	0	0	0	0	0	0	1	0	0	0	0	0	0	0	0	0	0	0	0	1	0	0	3	0	0	0	0	0
denovo1089	1	1	0	0	1	0	1	0	4	0	0	0	0	0	1	0	0	0	0	0	0	0	0	1	0	0	0	0	0	1	1	0	1	0	2	0	1	2	2	0	0	0	0	0	0	1	0	2	2
denovo1090	0	0	0	0	0	0	0	0	0	0	0	0	0	0	0	0	0	0	0	0	0	0	0	0	0	0	0	0	0	0	0	0	0	0	0	0	0	0	0	0	0	0	0	0	0	0	0	0	0
denovo1093	0	1	0	0	3	0	0	0	0	0	0	0	0	1	1	2	0	1	0	0	0	2	0	0	0	0	0	0	0	0	1	0	0	0	1	1	3	0	0	1	0	1	0	0	2	0	0	0	0
denovo1096	1	0	1	0	0	0	0	0	0	0	0	0	0	0	0	0	0	0	0	0	0	0	0	0	0	0	0	0	0	0	0	0	0	0	0	0	0	0	0	0	0	0	0	0	0	0	0	0	0
denovo1097	0	0	0	0	0	0	0	0	0	0	0	0	0	0	0	0	2	0	0	0	0	0	0	0	0	0	0	0	0	0	0	0	0	0	0	0	0	0	0	0	0	0	0	0	0	0	0	0	0
denovo1098	0	0	0	0	0	0	0	0	0	0	0	2	0	0	0	0	0	0	0	0	0	0	0	0	0	0	0	0	0	0	0	0	1	0	0	0	0	0	0	0	0	0	0	0	0	0	0	0	0
denovo1099	10	1	5	0	10	0	1	3	5	6	10	12	1	5	10	6	5	4	6	2	1	6	2	4	0	0	6	2	0	11	4	3	5	2	7	6	4	3	5	2	1	2	1	0	5	11	3	7	0
denovo1100	2	1	5	0	27	20	6	13	9	4	1	5	2	0	2	5	0	1	7	2	0	0	2	4	2	38	5	2	2	9	3	1	0	8	7	6	4	5	5	13	0	6	22	12	6	56	5	4	15
denovo1101	0	0	0	0	0	0	0	0	0	0	0	0	0	0	0	0	0	0	0	0	0	0	0	0	0	0	0	0	0	0	0	0	0	0	0	0	0	0	0	0	0	0	0	0	0	0	0	0	0
denovo1102	0	0	0	0	0	0	0	0	0	0	0	0	0	0	0	0	0	0	0	0	0	0	0	0	0	0	0	0	0	0	0	0	0	0	0	0	0	0	0	0	0	0	0	0	0	0	0	0	0
denovo1104	0	0	0	0	0	0	0	0	0	0	0	0	7	1	0	3	0	0	2	1	0	1	2	1	5	0	0	0	1	0	0	0	0	0	0	0	0	0	2	0	0	0	0	4	0	2	0	0	0
denovo1105	0	0	0	0	0	0	0	11	0	0	0	0	0	2	0	0	0	0	0	0	0	2	0	1	0	0	1	0	0	0	0	0	0	0	11	0	0	0	0	0	0	2	0	0	0	1	0	1	0
denovo1106	0	0	0	0	0	0	0	0	0	0	0	0	0	0	0	0	0	0	0	0	0	0	0	0	0	0	0	0	0	1	0	0	0	0	1	0	0	0	0	0	0	0	0	0	0	0	0	0	0
denovo1107	0	0	0	0	0	0	0	0	0	0	0	0	0	0	0	0	0	0	0	0	0	0	0	0	0	0	0	0	0	0	0	0	3	0	0	0	0	0	0	0	0	0	0	0	0	0	0	0	0
denovo1108	6	13	10	0	7	4	2	3	11	3	12	10	9	2	42	9	0	4	1	0	1	3	6	2	0	2	4	1	0	9	1	1	6	4	5	2	12	2	3	2	1	2	0	0	10	3	14	9	0
denovo1109	0	0	0	0	0	0	0	1	0	2	0	0	0	0	0	0	0	0	0	0	0	0	0	0	0	0	0	0	0	0	0	0	0	0	0	1	0	0	0	0	0	0	0	0	0	0	0	0	0
denovo1110	0	0	0	0	0	0	2	0	0	0	0	0	0	0	0	0	0	0	0	0	0	0	0	0	0	0	0	0	0	0	0	0	0	0	0	0	0	0	0	0	0	0	0	0	0	0	0	0	0
denovo1111	0	0	0	0	0	0	0	0	0	0	0	0	0	0	0	2	0	0	0	0	0	0	0	0	0	0	0	0	0	0	0	2	0	0	0	0	0	0	0	0	0	0	0	0	0	0	0	0	0
denovo1113	0	0	0	0	0	0	0	0	0	0	0	0	0	0	0	0	0	2	0	0	0	0	0	0	0	0	0	0	0	0	0	0	1	0	0	0	0	0	0	0	0	0	0	0	0	0	0	0	0
denovo1114	0	0	0	0	0	0	0	0	0	0	0	0	0	0	0	0	0	0	0	0	0	0	0	1	0	0	0	0	1	0	0	0	0	0	0	0	0	0	0	0	0	0	0	0	0	0	0	0	0
denovo1117	0	0	0	1	0	0	0	0	0	0	0	0	0	0	0	0	0	0	0	0	0	0	0	0	0	0	0	0	0	0	0	0	0	0	0	0	0	0	0	0	0	0	0	0	0	0	0	0	0
denovo1118	1	5	1	0	37	3	7	7	6	0	0	11	3	1	1	4	2	2	5	2	0	0	0	2	5	28	5	4	2	11	8	0	3	10	4	6	8	2	4	7	0	3	10	5	9	5	4	13	11
denovo1119	2	0	0	0	5	6	1	0	2	0	0	4	0	0	1	0	0	0	0	0	0	0	1	0	0	7	0	0	0	1	1	0	0	1	0	0	2	0	0	2	0	0	1	0	0	1	0	0	2
denovo1121	0	0	0	0	0	0	0	0	0	0	0	0	0	0	0	0	0	0	0	0	0	0	0	1	2	0	0	0	0	0	0	4	0	0	0	0	0	0	0	0	0	0	0	0	0	0	0	0	0
denovo1122	0	0	0	0	0	0	0	0	0	0	0	0	0	0	0	1	1	0	0	0	0	3	0	0	0	0	0	0	0	0	0	0	0	0	0	0	0	0	1	0	0	0	0	0	0	0	0	0	0
denovo1123	0	0	0	0	0	0	0	0	0	0	0	0	0	0	0	0	0	1	0	0	0	0	0	0	0	0	0	0	0	0	0	0	0	0	0	0	0	0	0	0	0	0	0	0	0	0	0	0	0
denovo1124	0	0	0	0	0	0	0	0	0	0	0	0	0	0	0	2	5	25	5	0	8	2	0	0	0	0	0	0	0	0	0	0	0	0	0	0	0	0	0	0	0	0	0	0	0	0	0	0	0
denovo1125	0	0	1	0	0	0	0	0	0	0	0	0	0	0	0	0	0	0	0	0	0	0	0	0	0	0	0	0	0	0	0	0	0	0	1	0	0	0	0	0	0	0	0	0	0	0	0	0	0
denovo1126	0	0	1	3	0	0	0	0	0	0	0	0	0	0	0	0	0	0	0	0	1	1	0	0	0	0	0	0	1	0	0	0	0	0	0	0	0	0	0	0	0	0	0	0	0	0	0	0	0
denovo1128	4	3	0	0	8	1	1	2	2	5	0	10	4	6	4	7	6	3	8	0	4	5	2	3	2	1	6	11	3	2	2	2	5	2	7	4	6	2	5	1	1	2	0	2	0	2	0	3	1
denovo1130	0	0	0	0	0	0	0	0	0	0	0	0	0	0	0	0	1	1	0	0	1	2	0	2	0	0	0	0	0	0	0	0	0	0	0	0	0	0	0	0	0	0	0	0	0	0	0	0	0
denovo1132	0	0	0	0	0	0	0	6	0	0	0	0	0	0	0	0	0	0	0	0	0	0	0	0	0	0	0	0	0	0	0	0	0	0	0	0	0	0	0	0	0	0	0	0	1	0	1	0	0
denovo1134	0	0	0	1	1	0	3	1	1	1	0	1	1	2	0	2	1	2	2	0	3	2	0	8	0	0	3	5	0	0	0	0	2	1	2	2	8	1	0	0	0	0	0	3	0	0	2	2	0
denovo1135	0	0	0	0	0	0	0	0	0	0	0	0	0	0	0	0	0	0	0	0	0	0	0	0	0	0	0	0	0	0	0	0	0	0	0	1	0	0	0	0	0	1	2	0	0	0	0	0	0
denovo1136	1	9	2	1	5	5	5	6	2	2	3	2	0	0	11	0	1	5	0	1	0	1	0	1	0	2	0	0	0	4	0	0	0	1	0	3	2	1	3	1	0	0	2	1	1	0	1	1	2
denovo1137	0	0	0	3	0	0	0	0	0	0	0	0	0	0	0	0	0	0	0	0	3	0	0	0	0	0	0	0	0	0	0	0	0	0	0	0	0	0	0	0	0	0	0	0	0	0	0	0	0
denovo1138	0	0	0	1	0	0	0	0	0	0	0	0	0	0	0	0	0	0	0	0	1	0	0	0	0	0	0	0	0	0	0	0	0	0	0	0	0	0	0	0	0	0	0	0	0	0	0	0	0
denovo1139	0	0	0	0	0	0	0	0	0	1	0	0	0	0	0	3	2	1	1	0	0	0	1	1	0	0	0	2	0	0	0	0	0	0	0	0	0	0	0	0	1	0	0	0	0	0	0	0	0
denovo1140	0	0	0	0	0	0	0	0	0	0	0	0	0	0	0	0	0	0	0	0	0	0	0	0	0	0	0	0	0	0	0	0	0	0	0	0	0	0	0	0	0	0	0	0	0	0	0	0	0
denovo1143	0	0	0	0	0	2	1	3	2	3	2	0	1	1	5	1	0	0	1	0	0	0	1	1	1	0	0	0	0	0	0	1	0	0	0	1	1	0	3	0	0	0	2	0	1	2	0	2	0
denovo1145	8	8	0	0	21	12	4	4	18	3	1	9	0	0	2	0	0	0	0	0	0	0	0	0	0	20	0	0	0	3	30	0	0	0	1	0	5	0	0	3	0	0	4	1	1	5	1	2	9
denovo1147	0	0	0	0	0	0	0	0	0	0	0	0	0	0	0	0	0	0	0	0	0	0	0	0	0	0	0	0	0	0	0	2	0	0	0	0	0	0	0	0	0	0	0	0	0	0	0	0	0
denovo1148	0	0	0	0	0	2	0	0	0	0	0	0	0	0	0	0	0	0	0	0	0	0	0	0	0	0	0	0	0	0	0	0	0	0	0	0	0	0	0	0	0	0	0	0	0	0	0	0	2
denovo1149	0	0	0	0	0	0	0	0	0	0	0	0	0	0	0	0	0	0	0	1	0	1	0	0	0	0	0	1	0	0	0	0	0	0	0	0	0	0	0	0	0	0	0	0	0	0	0	0	1
denovo1150	2	2	3	0	4	0	1	2	2	1	1	1	0	1	2	0	0	0	0	1	0	1	0	1	0	1	1	0	0	2	1	0	1	3	6	0	8	0	3	1	0	0	1	2	3	4	1	2	1
denovo1152	0	0	0	0	0	0	0	0	0	0	0	0	0	0	0	0	0	0	0	0	0	0	0	0	0	0	0	0	0	1	0	0	0	0	0	1	0	0	0	0	0	0	0	0	0	0	0	0	0
denovo1155	0	0	0	0	0	0	0	0	0	0	0	0	0	0	0	0	0	0	0	0	0	0	0	0	0	0	0	0	0	0	0	0	3	0	0	0	0	0	0	0	0	0	0	0	0	0	0	0	0
denovo1158	22	1	28	0	3	6	0	19	28	2	5	4	3	8	17	1	1	6	5	1	0	4	0	1	0	0	3	3	0	4	0	1	3	3	6	8	5	4	4	1	0	29	6	0	4	3	7	3	6
denovo1159	0	0	0	0	0	0	0	0	0	0	0	0	1	0	0	0	2	1	3	0	0	1	0	0	0	0	0	1	1	0	0	4	0	0	0	0	0	0	0	0	1	0	0	2	0	0	0	0	0
denovo1161	0	0	0	0	0	0	0	0	0	0	0	0	0	0	0	0	0	1	0	0	0	0	0	0	1	0	0	0	0	0	0	0	0	0	0	0	0	0	0	0	0	0	0	0	0	0	0	0	0
denovo1162	0	0	0	0	0	0	0	0	0	10	1	1	58	0	0	1	1	0	0	1	0	1	1	4	1	0	1	1	0	0	0	13	1	0	19	0	0	0	0	0	0	0	0	0	5	0	1	4	0
denovo1163	1	0	0	0	0	1	0	0	2	0	0	0	0	0	0	0	0	0	0	0	0	0	0	0	0	0	0	0	0	0	0	0	0	0	0	0	0	0	0	0	0	0	0	0	0	0	0	0	0
denovo1166	0	0	0	0	0	0	0	0	0	0	0	0	0	0	0	0	0	0	7	0	0	0	0	1	0	0	0	0	0	0	0	0	0	0	0	0	0	0	0	0	0	0	0	0	0	0	0	0	0
denovo1167	0	0	0	0	1	0	0	0	0	0	0	0	2	2	0	1	2	0	2	0	0	0	0	0	2	0	3	0	0	0	0	0	0	0	0	1	0	0	1	0	0	1	0	1	0	0	0	0	0
denovo1168	0	0	0	0	0	0	0	0	0	1	0	0	0	0	0	0	0	1	0	0	0	0	0	0	0	0	0	0	0	0	0	0	0	0	0	0	0	0	0	0	0	0	0	0	0	0	0	0	0
denovo1170	18	0	2	0	3	0	1	0	0	0	0	0	0	0	0	0	0	0	0	0	0	0	0	0	0	0	0	0	0	0	0	0	0	2	0	0	0	1	0	1	0	0	0	0	0	0	0	0	3
denovo1171	0	0	0	0	0	0	0	0	0	0	2	0	0	0	0	0	0	0	0	0	0	0	0	0	0	0	0	0	0	0	0	0	0	0	0	0	0	0	0	0	0	0	0	0	0	0	0	0	0
denovo1172	0	0	0	0	0	0	0	0	0	0	0	0	0	0	0	0	0	0	0	0	0	0	0	0	0	0	0	0	0	0	0	0	7	0	0	0	0	0	0	0	0	0	0	0	0	0	0	0	0
denovo1173	0	0	0	0	0	0	0	0	0	0	1	0	0	0	0	0	0	0	0	0	0	0	0	0	0	2	0	0	0	1	0	0	0	0	0	1	0	0	0	0	0	0	0	0	0	0	0	0	0
denovo1175	3	0	1	26	2	0	0	2	0	3	0	0	0	0	0	0	0	84	4	0	20	0	0	9	0	0	0	2	0	0	0	0	0	1	7	5	0	1	0	0	1	0	0	7	1	4	0	3	1
denovo1176	0	0	0	2	0	0	0	0	0	0	0	0	0	0	0	0	0	0	0	0	1	0	0	0	0	0	0	0	0	0	0	0	0	0	0	0	0	0	0	0	0	0	0	0	0	0	0	0	0
denovo1177	0	0	0	0	0	0	0	0	0	0	0	0	0	0	0	0	0	0	0	0	0	0	0	0	0	0	0	2	0	0	0	0	0	0	0	0	0	0	0	0	0	0	0	0	0	0	0	0	0
denovo1178	0	0	0	0	0	0	0	0	0	0	0	0	0	0	0	0	0	0	0	0	0	0	0	0	0	0	0	0	0	0	0	0	0	0	0	0	0	0	0	0	0	0	0	0	0	0	0	0	0
denovo1179	0	0	1	0	0	0	1	0	0	0	0	0	0	0	0	0	0	0	0	0	0	0	0	0	0	0	0	0	0	0	0	0	0	0	0	0	0	0	0	0	0	0	0	0	0	0	0	0	4
denovo1180	1	0	0	0	0	0	0	0	0	1	0	0	0	0	0	0	0	0	0	0	0	1	0	0	0	0	0	0	0	0	0	0	0	0	0	0	0	0	1	0	0	0	0	0	0	0	0	0	0
denovo1182	0	0	0	0	0	0	0	0	0	0	0	0	0	1	0	0	0	1	0	0	0	0	0	2	0	0	0	0	0	0	0	0	0	0	0	1	0	0	0	0	0	0	0	0	0	0	0	0	0
denovo1183	0	0	0	0	0	0	0	0	0	0	0	0	0	0	0	0	0	0	1	0	0	0	0	0	0	0	0	0	0	0	0	0	0	0	0	0	0	0	0	1	0	0	0	0	0	0	0	0	0
denovo1185	3	1	4	2	4	3	4	0	0	3	1	1	1	2	2	3	0	2	4	1	0	2	2	1	1	1	5	1	0	7	3	3	0	5	5	1	6	0	4	1	2	2	0	0	5	5	10	8	0
denovo1186	0	1	0	0	3	0	1	0	0	0	0	0	0	0	0	0	0	0	0	0	0	0	0	0	0	0	0	0	0	4	2	0	0	0	0	0	0	1	0	2	0	0	3	0	0	0	0	1	2
denovo1187	1	0	2	0	7	0	0	0	5	0	2	0	1	0	1	0	0	0	0	0	0	0	0	0	0	0	1	0	0	2	5	1	0	1	1	1	0	4	0	4	0	1	0	0	0	0	0	0	10
denovo1188	0	0	0	0	0	0	0	0	0	0	0	0	0	1	0	0	1	2	0	0	0	0	0	0	0	0	0	0	1	0	0	0	0	0	0	0	0	0	0	0	0	0	0	0	0	0	0	0	0
denovo1189	0	0	0	2	0	0	0	0	0	0	0	0	0	0	0	0	0	0	0	0	0	0	0	0	0	0	0	0	0	0	0	0	0	0	0	0	0	0	0	0	0	0	0	0	0	0	0	0	0
denovo1191	0	0	0	0	0	0	0	0	0	0	0	0	0	0	0	0	0	0	0	0	0	0	0	0	0	0	0	0	0	0	0	0	0	0	0	0	0	0	0	0	0	0	0	0	0	0	0	0	0
denovo1193	0	0	0	0	0	0	0	0	0	0	0	0	0	0	0	0	0	0	0	0	0	0	0	0	0	0	0	0	0	0	0	0	0	0	1	0	0	0	0	0	0	0	1	0	0	0	0	0	0
denovo1194	0	0	0	0	2	0	0	0	0	1	0	0	1	1	0	0	2	0	0	0	0	3	0	0	0	0	0	1	0	0	0	0	0	0	0	0	0	0	0	0	0	0	0	0	0	0	0	0	0
denovo1195	4	0	5	0	0	2	2	9	0	36	2	8	3	3	0	7	0	24	14	0	1	4	6	5	0	0	3	47	6	5	1	0	2	1	1	2	0	1	12	1	5	2	1	12	1	5	1	1	0
denovo1196	0	1	1	0	0	0	0	0	0	0	0	1	0	0	0	0	0	0	0	0	0	0	0	0	0	0	0	0	0	0	0	0	0	0	0	0	0	0	0	0	0	0	0	0	0	0	0	0	0
denovo1197	0	0	9	4	0	1	0	0	0	0	0	0	1	0	0	0	0	1	2	1	0	1	1	0	0	0	0	0	0	0	0	0	0	0	0	0	0	1	0	0	0	1	0	0	0	0	0	0	0
denovo1198	0	0	0	0	0	1	0	0	0	0	0	0	0	0	0	0	0	0	0	0	0	0	0	0	0	0	0	0	0	2	0	0	1	0	0	0	0	0	0	0	0	0	0	0	0	0	1	0	0
denovo1199	4	1	5	0	7	1	3	6	4	1	2	2	6	5	0	2	3	1	17	1	0	1	2	1	2	17	4	1	2	6	10	0	2	3	1	1	2	1	5	12	1	2	5	2	0	8	0	2	5
denovo1201	0	0	0	11	9	0	0	0	0	0	0	1	2	3	0	2	2	3	5	0	1	1	4	4	0	0	0	4	2	9	0	0	0	0	0	0	0	0	1	1	0	0	3	0	0	0	0	0	0
denovo1202	1	0	0	7	0	0	0	0	0	0	1	3	1	0	3	0	0	0	1	0	17	0	0	1	0	0	0	1	0	0	0	0	0	0	1	0	0	0	0	0	0	0	0	0	0	0	0	0	0
denovo1203	0	0	0	0	0	0	0	0	0	0	0	0	0	0	0	0	0	0	0	0	0	0	0	0	3	0	0	0	0	0	0	0	0	0	0	0	0	0	0	0	0	0	0	0	0	0	0	0	0
denovo1205	0	0	0	0	0	0	0	0	0	0	0	0	0	0	0	0	0	0	0	0	0	0	0	0	0	0	0	0	0	0	0	0	0	0	0	0	0	2	0	0	0	0	0	0	0	0	0	0	0
denovo1206	0	0	0	0	0	0	0	0	0	0	0	0	0	3	0	0	2	1	0	0	0	1	0	0	0	0	1	1	1	0	0	4	0	0	0	0	0	0	0	0	0	0	0	0	0	0	0	0	0
denovo1207	0	0	0	0	0	0	0	0	0	0	0	0	0	0	0	0	1	0	0	0	0	0	0	0	0	0	0	0	0	0	0	0	0	0	0	0	0	0	0	0	0	0	0	0	0	0	0	0	0
denovo1208	0	0	0	0	0	0	0	0	0	0	0	0	0	0	0	0	0	0	0	0	0	0	0	0	0	0	0	0	0	2	0	0	0	0	0	0	0	0	0	0	0	0	0	0	0	0	0	0	0
denovo1212	0	0	0	0	0	0	0	0	0	0	0	0	0	0	0	0	0	0	0	0	0	0	0	0	0	3	0	0	0	0	0	0	0	0	0	0	0	1	0	0	0	0	0	0	0	0	0	0	0
denovo1213	0	0	0	0	0	0	0	0	0	0	0	0	0	0	0	0	0	0	0	0	0	0	0	0	0	0	0	0	0	0	0	0	0	0	0	0	0	0	0	0	0	0	0	6	0	0	0	0	0
denovo1214	1	0	0	0	0	1	0	0	3	0	0	0	0	0	0	0	0	0	0	1	0	0	0	0	0	1	0	1	0	0	0	0	0	0	0	0	1	0	1	0	0	0	0	0	0	0	0	0	0
denovo1216	0	0	0	0	0	0	0	0	0	0	0	0	0	0	0	0	0	0	0	0	0	0	0	0	0	0	0	0	0	0	0	0	0	0	0	0	0	0	0	0	0	0	0	0	0	0	0	0	0
denovo1217	0	0	0	0	4	0	1	2	0	0	2	0	0	0	0	1	0	0	0	0	0	0	0	0	0	0	0	1	0	4	3	0	1	1	0	2	0	0	0	0	0	2	0	0	1	2	1	2	0
denovo1218	0	0	0	0	0	0	1	1	0	0	0	0	0	0	0	0	0	0	0	0	0	0	0	1	0	0	0	0	0	0	0	0	0	0	1	2	0	0	0	0	0	0	0	0	0	0	0	0	0
denovo1219	0	0	5	0	6	0	1	5	6	0	1	3	0	0	0	0	0	0	0	0	0	0	0	0	0	3	0	0	0	3	3	0	0	1	0	0	1	0	0	1	0	0	0	0	0	0	0	2	0
denovo1220	0	0	0	0	0	0	0	0	0	0	0	0	0	0	0	0	1	0	3	0	0	0	0	0	0	0	0	0	0	0	0	0	0	0	0	0	0	0	0	0	0	0	0	0	0	0	0	0	0
denovo1221	0	0	0	0	3	0	2	0	1	11	0	2	0	10	0	18	36	4	5	7	0	23	8	0	4	0	46	1	2	0	0	0	1	0	1	0	0	0	28	0	4	0	0	6	0	0	0	2	0
denovo1223	0	0	0	0	0	0	0	0	0	0	0	0	0	0	0	0	0	0	0	0	0	0	0	0	0	0	0	0	0	0	0	0	0	0	0	0	0	0	0	0	0	0	0	0	0	0	0	0	0
denovo1224	0	0	0	0	0	0	0	0	0	0	0	0	0	0	0	0	0	0	0	0	0	0	0	0	0	0	0	0	0	0	0	0	0	0	0	0	0	0	0	0	0	0	0	0	0	0	0	0	0
denovo1225	0	0	0	2	0	0	0	0	0	0	0	0	0	0	0	0	0	0	0	0	0	0	0	0	0	0	0	0	0	0	0	0	0	0	0	0	0	0	0	0	0	0	0	0	0	0	0	0	0
denovo1226	0	0	0	0	0	0	0	0	0	0	0	0	0	0	0	0	0	0	0	0	1	1	0	0	0	0	0	0	0	0	0	0	0	0	0	0	0	0	0	0	0	0	0	0	0	0	0	0	0
denovo1227	0	0	1	0	0	0	0	0	0	0	0	0	0	0	0	0	0	1	1	0	0	0	0	0	0	0	0	1	0	0	0	0	0	0	0	0	0	0	0	0	0	0	0	0	0	0	0	0	0
denovo1228	0	0	0	0	3	0	0	0	0	0	0	1	0	1	0	0	0	0	0	0	0	1	0	0	0	1	2	0	0	0	0	1	1	0	0	0	0	0	0	0	0	0	0	1	0	0	0	0	1
denovo1229	2	0	0	0	6	0	0	0	0	0	0	0	0	0	0	0	0	0	0	0	0	0	0	0	0	3	0	0	0	4	0	0	0	1	0	0	0	0	2	0	0	0	0	0	1	0	0	1	0
denovo1230	0	0	0	0	0	1	0	0	0	0	0	0	0	0	0	0	0	0	1	0	0	1	0	0	0	0	0	0	1	0	0	0	0	0	0	0	0	0	0	0	0	0	0	0	0	0	0	0	0
denovo1231	0	0	0	0	0	0	0	0	0	0	0	0	0	0	0	0	0	0	1	0	0	0	0	0	0	0	0	0	0	0	0	0	0	0	0	0	0	0	0	0	0	0	0	1	0	0	0	0	0
denovo1232	0	0	1	5	5	1	2	5	0	1	0	1	0	0	2	2	0	3	6	0	0	0	0	2	1	0	0	2	0	5	0	0	0	3	0	5	1	0	0	3	0	1	0	3	1	8	3	1	1
denovo1233	0	0	0	0	0	0	0	0	0	0	0	4	55	7	1	3	24	0	0	7	0	12	1	0	5	1	0	3	3	2	0	20	31	0	0	0	0	0	1	0	0	0	0	23	0	0	0	0	0
denovo1235	0	0	0	4	0	0	0	0	0	0	0	0	0	0	0	0	0	1	0	0	0	0	0	2	0	0	0	0	0	0	0	0	0	0	0	0	0	0	0	0	0	0	0	0	0	0	0	0	0
denovo1236	4	1	0	0	11	0	5	19	0	0	0	9	0	0	1	0	0	0	0	0	1	0	0	0	0	0	0	0	0	19	22	0	0	8	5	5	2	0	0	2	0	12	13	0	16	19	11	3	17
denovo1237	0	0	0	0	7	0	1	0	0	1	0	1	1	3	0	0	0	6	4	0	0	0	0	0	0	2	0	5	0	10	0	0	0	1	0	0	0	0	2	0	3	1	1	1	1	4	0	0	2
denovo1238	0	0	0	1	0	0	0	0	0	0	0	0	0	0	0	0	0	0	0	0	0	0	0	0	0	0	0	0	1	0	0	0	0	0	0	0	0	0	0	0	0	0	0	0	0	0	0	0	0
denovo1239	0	0	0	0	0	0	0	0	0	0	0	0	0	1	0	2	0	1	5	0	0	2	0	2	0	0	0	1	1	0	0	0	0	0	0	0	0	0	2	0	1	0	0	1	0	0	0	0	0
denovo1240	1	0	0	0	0	0	0	0	0	0	0	0	0	0	1	0	0	0	0	0	0	0	0	0	0	0	0	0	0	0	0	1	0	0	0	0	2	0	1	0	0	0	0	0	0	0	0	0	0
denovo1243	0	0	0	0	0	0	0	0	0	0	0	0	0	0	0	0	0	0	0	0	0	0	0	0	0	0	0	0	0	0	0	0	0	0	0	0	0	0	0	0	0	0	0	0	0	0	0	0	0
denovo1244	0	0	2	0	0	0	0	0	0	0	0	0	0	0	0	0	0	0	0	0	0	0	0	0	0	0	0	0	0	0	0	0	0	0	0	0	0	0	0	0	1	0	0	0	0	0	0	0	0
denovo1245	1	0	1	0	0	0	0	0	0	0	0	1	0	6	0	0	0	0	0	0	0	0	0	0	0	1	0	0	0	1	3	0	2	0	0	0	5	0	0	0	0	0	0	0	1	0	0	0	1
denovo1246	1	0	0	0	1	0	0	1	0	0	0	0	0	4	0	0	0	0	0	0	0	5	0	0	2	0	1	0	0	0	0	1	44	0	2	0	0	0	0	0	1	0	2	0	0	0	1	0	1
denovo1247	0	0	0	2	1	0	1	0	0	1	2	0	0	0	8	1	0	0	0	0	0	0	0	0	0	0	0	0	0	0	0	0	0	0	0	0	0	0	0	0	0	0	0	0	0	0	0	0	0
denovo1248	0	0	0	0	2	0	0	0	0	0	0	0	0	0	0	0	0	0	0	0	0	0	0	0	0	0	0	0	0	0	0	0	0	0	0	0	0	0	0	0	0	0	0	0	0	0	0	0	0
denovo1249	0	0	0	0	0	0	0	0	0	0	0	0	0	0	0	0	0	0	0	0	0	0	0	0	0	0	0	0	0	0	0	0	0	0	0	1	0	0	0	0	0	0	0	0	0	0	0	0	0
denovo1251	0	0	0	0	2	0	0	0	0	0	0	2	3	0	0	1	0	1	1	0	0	0	0	0	0	8	0	0	0	0	1	1	0	0	0	2	0	0	0	0	0	0	8	0	0	0	0	0	0
denovo1252	0	0	0	1	0	0	0	0	0	0	0	0	6	1	0	0	0	0	1	3	32	0	2	0	1	0	0	0	3	0	0	0	0	0	0	0	0	0	0	0	0	0	0	0	0	0	1	0	0
denovo1253	0	0	0	0	0	0	0	0	0	0	0	0	0	0	0	0	0	0	2	0	0	0	0	0	0	0	0	0	0	0	0	0	0	0	0	0	0	0	0	0	0	0	0	0	0	0	0	0	0
denovo1254	0	0	0	0	0	0	0	0	0	0	0	0	0	0	0	0	3	1	0	0	1	0	0	0	7	0	0	0	2	0	0	0	0	0	0	0	0	0	0	0	0	0	0	0	0	0	0	0	0
denovo1255	0	0	0	0	0	3	0	0	0	0	1	1	0	0	1	0	0	0	0	0	0	0	0	0	0	11	0	1	0	0	0	0	0	0	0	0	0	1	0	0	0	0	3	0	0	0	0	0	0
denovo1257	0	0	0	0	2	0	1	0	0	0	0	0	0	0	0	0	1	0	0	0	0	0	0	0	0	0	0	0	0	0	0	0	0	0	0	0	0	0	0	0	0	0	0	0	0	0	0	0	0
denovo1258	21	3	8	2	22	29	16	19	11	25	3	2	19	30	8	13	3	8	39	8	1	6	4	15	14	17	12	15	13	10	1	3	21	29	15	4	24	6	23	11	7	15	11	22	3	8	8	9	18
denovo1259	0	0	1	0	2	0	0	0	1	0	1	1	0	0	0	0	0	0	0	0	0	0	0	0	1	2	0	2	0	0	0	0	0	0	0	0	0	0	0	0	0	0	0	0	0	0	0	0	0
denovo1260	0	0	0	0	0	0	1	0	0	1	0	1	0	0	0	1	0	0	1	0	0	0	0	0	0	0	0	1	0	0	0	0	0	0	0	0	0	0	0	0	0	0	0	1	0	0	0	0	0
denovo1261	0	0	0	0	0	0	0	0	0	0	0	0	0	0	0	0	0	0	0	0	0	0	0	0	0	0	0	0	0	0	0	0	0	0	0	0	0	0	0	0	0	0	0	0	0	0	0	0	0
denovo1262	0	0	0	0	0	0	0	0	0	0	2	0	0	1	1	0	0	0	0	0	0	0	0	0	1	0	0	0	0	0	0	0	0	0	0	0	0	0	0	0	0	0	0	0	0	0	0	0	0
denovo1263	0	0	0	0	0	0	0	0	0	2	0	0	0	0	0	0	0	0	0	0	0	0	0	0	0	0	0	0	0	0	0	0	0	0	0	0	0	0	0	0	0	0	0	0	0	0	0	0	0
denovo1266	0	0	0	0	0	0	0	0	0	0	0	0	0	0	0	0	0	0	0	0	0	0	0	1	0	0	1	0	0	0	0	0	0	0	0	0	0	0	0	0	0	0	0	0	0	0	0	0	0
denovo1267	0	0	0	0	0	0	0	0	0	0	0	0	0	0	0	0	0	1	0	0	0	0	0	0	0	0	0	0	0	0	0	0	0	0	0	0	0	0	0	0	0	0	0	0	0	0	0	0	0
denovo1269	0	0	0	4	0	0	0	0	0	0	0	0	1	0	0	0	0	1	1	0	5	0	0	1	0	0	0	0	1	0	0	0	0	0	0	0	0	0	0	0	0	0	0	0	0	0	0	0	0
denovo1270	0	0	0	0	0	0	0	0	0	0	0	0	0	0	0	0	0	0	0	0	2	0	0	0	0	0	0	0	0	0	0	0	0	0	0	0	0	0	0	0	0	0	0	0	0	0	0	0	0
denovo1271	0	0	0	0	0	0	0	0	0	0	0	0	0	0	0	0	0	0	0	0	0	0	0	0	0	0	0	0	0	0	0	0	0	0	0	0	0	0	0	0	0	0	0	0	0	0	0	0	0
denovo1273	0	0	0	0	0	0	0	0	0	0	0	0	0	0	0	1	0	0	0	0	0	0	0	0	0	0	0	0	0	0	0	0	0	0	0	0	0	0	0	0	0	0	0	0	0	0	0	0	0
denovo1274	0	0	0	0	0	0	0	0	0	0	0	0	1	0	2	0	0	0	0	0	0	0	0	0	0	0	0	0	0	0	0	0	0	0	0	0	0	0	0	0	0	0	0	0	0	0	0	0	0
denovo1275	0	0	0	0	0	0	0	0	0	0	0	0	0	0	0	0	0	0	0	0	0	0	0	0	0	0	0	0	0	0	0	0	0	0	0	0	0	0	0	0	1	0	0	0	0	0	0	0	0
denovo1276	0	0	0	2	0	0	0	0	0	0	0	0	0	0	0	0	0	0	0	0	0	0	0	0	0	0	0	0	0	0	0	0	0	0	0	0	0	0	0	0	0	0	0	5	0	0	0	0	0
denovo1277	0	0	0	2	0	0	0	0	0	0	0	0	0	0	0	0	0	0	0	0	0	0	0	0	0	0	0	0	0	0	0	0	0	0	0	0	0	0	0	0	0	0	0	0	0	0	0	0	0
denovo1278	0	0	0	0	0	0	0	0	4	4	0	0	1	0	0	0	0	0	0	0	0	0	2	1	12	0	0	0	0	0	0	0	0	0	0	0	0	0	2	0	5	0	0	0	0	0	0	0	0
denovo1280	0	0	1	0	12	3	2	2	1	0	0	4	0	0	1	0	0	0	0	0	0	0	0	0	0	7	2	0	0	2	0	0	0	2	5	1	0	2	0	4	0	1	0	0	5	2	1	1	0
denovo1283	0	0	0	0	1	0	0	0	0	0	0	0	0	0	0	0	0	0	0	0	0	0	0	0	0	1	1	1	0	0	0	0	2	0	0	1	0	0	0	0	0	1	0	0	0	0	1	2	0
denovo1284	0	0	0	2	0	0	0	0	0	0	0	0	0	0	0	0	0	0	1	0	1	0	0	0	0	0	0	0	0	0	0	0	0	0	0	0	0	0	0	0	0	0	0	0	0	0	0	0	0
denovo1285	0	0	0	0	0	0	0	0	0	0	0	0	0	0	0	0	0	0	0	0	0	0	0	0	0	0	0	0	0	0	0	0	0	0	0	0	0	0	0	0	0	0	0	0	0	2	0	1	1
denovo1286	0	0	0	0	0	0	0	0	0	0	0	0	0	0	0	1	0	0	0	0	0	0	0	0	0	0	0	0	0	0	0	0	0	0	0	0	0	0	0	0	0	0	0	0	0	0	0	0	0
denovo1287	0	0	0	0	0	0	0	0	1	0	0	0	0	0	0	0	0	0	0	0	0	0	0	0	0	3	0	0	0	0	0	0	0	0	0	0	0	0	0	0	0	0	0	0	0	1	0	0	2
denovo1288	0	0	0	0	0	0	0	0	0	0	0	0	0	0	0	1	1	0	9	2	3	5	0	1	1	0	0	0	0	0	0	3	0	0	0	0	0	0	0	0	0	0	0	5	0	0	0	0	0
denovo1293	0	0	0	0	0	0	0	0	0	0	1	0	1	0	0	0	0	0	0	0	0	0	0	0	0	0	0	0	0	0	0	0	0	0	0	0	0	0	0	0	0	0	0	0	0	0	0	0	0
denovo1294	0	0	0	0	0	0	0	0	0	0	0	0	0	0	0	0	0	0	0	0	1	0	0	0	0	0	0	0	0	0	0	0	0	0	0	0	0	0	0	0	0	0	0	0	0	0	0	0	0
denovo1296	0	0	0	0	0	0	0	0	0	0	0	1	0	0	0	0	0	0	0	0	0	0	0	0	0	5	0	0	0	0	0	0	0	0	0	0	0	0	0	0	0	0	0	0	0	0	0	0	0
denovo1298	15	1	0	0	0	4	0	0	9	0	1	21	0	0	0	1	0	0	0	1	1	0	0	0	0	38	0	0	1	9	0	0	1	0	0	0	2	13	0	0	0	1	0	0	0	0	0	0	0
denovo1299	1	0	0	1	0	0	0	1	0	1	0	2	0	0	0	0	2	0	0	0	7	1	1	0	0	0	1	0	0	0	2	1	0	0	0	0	1	0	0	0	0	0	0	0	1	0	0	0	0
denovo1300	0	0	0	0	0	0	0	0	0	0	0	0	0	0	0	0	0	0	0	0	10	0	0	0	0	0	0	0	0	0	0	0	0	0	0	0	0	0	0	0	0	0	0	0	0	0	0	0	0
denovo1301	0	0	0	2	0	0	0	0	0	0	0	0	0	0	0	0	0	0	0	0	0	0	0	0	0	0	0	0	0	0	0	0	0	0	0	0	0	0	0	0	0	0	0	0	0	0	0	0	0
denovo1304	0	0	0	0	0	0	0	0	0	0	0	1	1	0	0	0	0	0	0	0	0	0	0	0	0	0	0	0	0	0	0	0	3	0	0	0	0	0	0	0	0	0	0	0	0	0	0	0	0
denovo1305	0	0	0	0	0	0	0	0	0	0	0	0	0	0	0	0	0	0	0	0	0	0	0	0	0	0	0	0	0	0	0	0	0	0	0	0	0	0	0	0	0	0	0	0	0	0	0	0	0
denovo1306	0	0	2	5	0	0	1	3	3	49	0	2	3	2	0	14	181	9	3	10	0	1	0	5	3	0	1	29	0	0	0	3	0	1	3	1	0	0	5	1	20	1	0	2	0	2	0	0	0
denovo1307	0	1	0	0	0	0	0	0	0	0	0	1	0	0	0	0	0	0	0	0	0	0	0	0	0	0	0	0	0	0	0	0	0	0	0	0	0	0	0	0	0	0	0	0	0	0	0	0	0
denovo1308	0	0	2	0	2	0	0	1	1	1	0	1	0	0	0	1	0	0	1	0	0	0	0	0	0	0	1	0	0	4	0	0	2	0	1	0	1	0	2	1	0	0	2	0	2	0	0	1	0
denovo1309	0	0	0	0	0	0	0	0	0	0	0	0	0	0	0	0	0	0	0	0	0	0	0	0	0	0	0	0	0	0	0	0	0	0	0	0	0	0	2	0	0	0	0	0	0	0	0	0	0
denovo1310	0	0	0	0	1	1	0	0	1	0	0	0	0	0	0	0	0	0	0	0	0	0	0	0	0	1	0	1	0	0	1	0	0	0	0	0	0	0	0	1	0	0	0	0	0	0	0	0	0
denovo1311	3	0	0	0	2	1	2	2	0	1	0	1	1	0	0	0	1	1	1	1	0	0	0	0	0	10	0	1	0	0	1	0	0	1	1	4	0	0	0	0	0	0	0	0	0	2	0	0	2
denovo1312	0	0	0	0	0	0	0	0	0	0	0	0	0	0	0	1	0	0	1	0	0	1	1	0	0	0	0	0	0	0	0	0	0	0	0	0	0	0	0	0	0	0	0	0	0	0	0	0	0
denovo1313	0	0	0	0	0	0	0	0	0	1	0	0	0	0	0	0	0	0	0	0	0	0	0	1	0	0	0	0	0	0	0	0	0	0	1	0	0	0	0	0	0	0	0	0	0	0	0	0	0
denovo1314	0	0	0	0	0	0	0	0	0	0	0	0	0	0	0	0	0	0	0	0	3	0	0	0	0	0	0	0	0	0	0	0	0	0	0	0	0	0	0	0	0	0	0	0	0	0	0	0	0
denovo1315	0	0	0	0	0	0	0	0	0	1	0	0	0	0	0	0	0	1	0	0	0	0	1	0	0	0	0	1	0	0	0	1	0	0	0	0	0	0	2	0	0	0	0	1	0	0	0	0	0
denovo1316	0	0	0	5	0	0	0	0	0	0	0	0	0	0	0	0	1	0	1	0	5	0	0	1	0	0	0	0	0	0	0	0	0	0	0	0	0	0	0	0	0	0	0	0	0	0	0	0	0
denovo1317	14	16	19	8	47	13	17	55	31	20	10	30	17	35	39	10	7	11	16	12	6	12	9	11	6	44	25	14	8	65	30	8	33	11	44	15	66	2	14	21	3	19	17	7	39	41	40	38	22
denovo1318	0	0	0	0	1	0	0	1	0	0	0	0	0	0	0	0	0	0	0	0	0	0	0	0	0	0	0	0	0	0	0	0	0	0	0	0	0	0	0	0	0	0	0	0	0	0	0	0	0
denovo1319	14	7	12	1	11	11	7	8	8	6	7	30	0	6	10	7	3	9	4	0	0	3	8	2	9	2	4	2	14	18	10	0	2	1	1	3	4	13	2	6	0	7	27	6	3	11	1	0	5
denovo1320	0	0	0	0	0	0	0	0	0	0	0	0	0	0	0	0	0	0	0	0	0	0	0	0	0	0	0	0	0	0	0	0	0	0	0	0	0	0	0	0	0	0	0	0	0	0	0	0	0
denovo1321	1	1	0	0	10	0	3	1	0	1	0	1	8	1	2	0	4	2	8	0	1	1	0	1	2	0	4	0	1	7	1	3	0	0	0	1	1	0	4	2	1	2	2	4	0	1	0	0	0
denovo1322	0	0	0	9	0	0	0	0	0	0	0	0	0	0	0	0	0	0	0	0	10	0	0	0	0	0	0	0	0	0	0	0	0	0	0	0	0	0	0	0	0	0	0	0	0	0	0	0	0
denovo1324	0	0	0	0	1	0	1	0	0	0	0	0	0	0	0	0	0	0	0	0	0	0	0	0	0	0	1	0	0	1	0	0	0	0	0	0	0	0	0	0	0	0	1	0	1	0	1	0	0
denovo1325	0	0	0	2	0	0	0	0	0	0	0	0	0	0	0	0	0	0	0	0	2	2	0	2	0	0	4	1	0	0	0	0	0	0	0	0	0	0	1	0	0	0	0	1	0	0	0	0	0
denovo1327	0	0	0	0	0	0	0	0	0	0	1	0	0	0	0	0	0	0	2	0	0	0	0	0	0	0	0	0	0	0	0	0	0	0	0	0	0	0	0	0	0	0	0	0	0	0	0	0	0
denovo1329	0	0	0	5	0	0	0	0	0	0	0	0	0	0	0	0	0	0	0	0	0	0	0	0	0	0	0	0	0	0	0	0	0	0	0	0	0	0	0	0	0	0	0	0	0	0	0	0	0
denovo1330	3	0	0	0	2	0	0	0	0	0	0	1	0	0	1	0	0	0	1	0	1	1	0	0	0	1	0	0	0	1	0	0	1	0	7	0	2	0	0	0	0	0	3	0	5	1	4	3	0
denovo1331	0	0	1	1	1	0	1	2	2	2	0	0	0	1	0	1	0	1	0	0	2	0	0	2	0	0	2	0	1	0	0	0	5	4	0	0	1	1	0	0	0	0	0	2	0	3	0	0	0
denovo1332	0	0	0	0	0	0	0	0	0	1	0	0	0	4	0	0	0	0	0	0	0	0	0	0	0	0	0	0	0	0	0	0	0	0	0	0	0	0	1	0	0	0	0	0	0	0	0	0	0
denovo1333	0	0	0	0	0	0	0	0	0	0	0	0	0	0	1	0	0	0	0	0	0	0	0	0	0	0	0	0	0	0	0	0	0	0	0	0	0	0	0	0	0	0	0	0	0	0	0	0	0
denovo1334	31	13	22	3	16	1	8	18	14	8	8	16	24	14	29	13	3	19	4	5	6	18	7	13	1	6	11	7	1	23	5	2	18	11	19	6	10	1	15	4	6	7	4	4	14	7	31	13	1
denovo1336	0	0	0	0	0	0	0	0	0	0	0	0	0	0	0	0	0	0	0	0	0	0	0	0	0	0	0	0	0	0	0	0	0	0	0	0	0	0	1	0	0	0	0	0	0	0	0	0	0
denovo1337	0	0	1	0	1	0	0	1	0	0	0	0	0	0	0	0	1	0	1	0	0	0	0	0	0	0	0	0	0	0	0	0	0	0	0	0	0	0	0	0	0	0	0	1	1	0	1	0	0
denovo1338	0	0	0	0	0	0	0	0	0	0	0	0	0	0	0	0	0	0	0	0	0	0	0	1	0	0	0	0	0	0	0	0	0	0	0	0	0	0	0	0	0	0	0	0	0	0	0	0	0
denovo1339	0	0	0	0	0	0	0	2	0	1	0	1	1	1	0	0	0	0	3	0	1	0	0	0	0	1	1	3	0	0	1	0	0	0	1	0	0	0	0	0	0	0	0	2	0	1	0	0	0
denovo1340	0	0	0	0	0	0	0	0	0	0	0	0	0	0	0	0	0	0	0	0	0	0	0	0	0	0	0	0	0	0	0	0	0	0	0	0	0	0	0	0	0	0	0	0	0	0	0	0	0
denovo1342	0	0	0	0	0	0	0	0	0	0	0	0	0	0	0	0	0	0	0	0	0	0	0	0	0	0	0	0	0	0	0	0	0	0	0	0	0	0	0	0	0	0	0	0	0	0	4	0	0
denovo1343	0	0	0	0	0	1	0	1	0	0	0	0	0	0	0	0	0	0	0	0	0	0	0	0	0	7	0	0	0	0	0	0	0	0	0	0	0	0	0	0	0	0	0	0	0	0	0	0	0
denovo1344	0	0	0	0	0	0	0	0	0	0	0	0	0	0	3	0	0	0	0	0	0	0	0	0	0	0	0	0	0	0	0	0	0	0	0	0	0	0	0	0	0	0	0	0	0	0	0	0	0
denovo1345	0	0	0	0	0	0	0	0	0	0	0	0	0	1	0	1	0	0	0	0	0	0	0	0	0	0	0	0	0	2	0	0	0	0	0	0	0	0	0	0	0	0	0	0	0	0	0	0	0
denovo1346	0	0	0	0	0	0	0	0	0	0	0	0	0	0	0	0	0	0	0	0	4	0	0	0	0	0	0	0	0	0	0	0	0	0	0	0	0	0	0	0	0	0	0	0	0	0	0	0	0
denovo1348	0	0	0	0	0	0	0	0	0	0	0	0	0	0	0	0	0	0	1	0	0	0	0	0	3	0	0	0	0	0	0	0	0	0	0	0	0	0	0	0	0	0	0	0	0	0	0	0	0
denovo1349	0	0	0	0	0	0	0	0	0	3	0	0	0	0	0	0	0	0	0	0	0	0	0	0	0	0	0	0	0	0	0	0	0	0	0	0	0	0	0	0	0	0	0	0	0	0	0	0	0
denovo1350	0	0	0	0	0	0	0	0	0	0	0	0	0	0	0	0	0	0	0	0	0	0	0	0	0	0	0	0	0	0	0	0	0	0	0	1	0	0	0	0	0	2	0	0	0	1	0	0	0
denovo1351	1	0	0	0	0	0	0	0	1	0	0	0	0	0	0	0	0	0	0	0	0	0	0	0	0	0	0	0	0	1	0	0	0	0	0	0	0	0	0	0	0	0	0	0	1	0	0	0	0
denovo1352	1	0	0	0	3	2	3	2	2	0	0	2	2	0	0	0	0	0	0	0	0	0	0	0	1	1	0	0	0	1	0	0	0	0	0	0	1	0	0	0	0	1	0	0	0	0	0	1	4
denovo1353	0	0	2	0	5	1	1	1	1	3	0	1	11	0	0	1	0	3	0	0	0	0	0	2	3	1	10	9	0	1	0	0	1	0	11	4	0	1	0	1	0	5	0	0	1	7	1	4	0
denovo1354	0	1	0	0	4	0	0	0	2	0	1	1	1	0	0	0	0	0	0	0	0	0	0	0	0	2	0	0	0	3	1	0	0	0	0	0	0	0	0	0	0	0	0	0	0	2	0	0	0
denovo1355	0	0	0	0	0	0	0	0	0	0	0	0	0	0	0	0	0	0	0	0	0	0	0	0	0	0	0	0	0	0	0	0	0	0	0	0	0	0	0	0	0	0	0	0	0	0	0	0	0
denovo1356	0	0	0	0	0	0	0	0	0	0	0	0	0	0	0	0	0	0	0	0	0	0	0	0	0	0	0	0	0	0	0	0	0	0	0	0	0	0	0	0	0	0	0	0	0	0	0	0	0
denovo1357	0	0	0	1	2	0	0	0	0	0	0	0	0	1	0	2	0	0	6	2	1	0	0	0	0	0	0	0	0	0	0	0	0	0	0	0	0	0	1	0	0	0	0	0	0	0	0	0	0
denovo1360	0	0	0	0	0	0	0	0	1	0	0	0	0	0	0	0	0	0	0	0	0	0	0	0	0	0	0	0	0	0	0	0	0	0	3	0	0	0	0	0	0	0	0	0	0	0	6	0	0
denovo1361	0	0	0	0	1	0	0	0	0	0	0	0	0	0	0	0	0	0	0	0	0	0	0	0	0	0	0	0	0	1	0	0	0	0	0	0	0	0	0	0	0	0	1	0	0	0	0	0	0
denovo1362	0	0	0	0	0	2	0	1	0	0	0	1	0	2	0	0	0	0	0	0	0	0	0	0	0	1	0	0	0	4	5	0	1	0	0	0	0	2	0	0	0	0	2	0	0	0	0	3	4
denovo1363	0	0	0	0	0	0	0	0	0	0	0	0	0	0	0	1	0	1	0	0	0	0	0	0	0	0	0	0	0	0	0	0	0	0	0	0	0	0	0	0	0	0	0	0	0	0	0	0	0
denovo1364	0	0	0	0	0	0	0	0	0	0	0	0	0	0	0	0	0	4	0	0	0	0	0	6	0	0	0	0	0	0	0	0	0	0	0	0	0	0	0	0	0	0	0	0	0	0	0	0	0
denovo1365	0	0	0	0	0	0	0	0	0	0	0	0	0	0	0	0	0	0	0	0	0	0	0	0	2	0	0	0	0	0	0	0	1	0	0	0	0	0	0	0	0	0	0	0	0	0	0	0	0
denovo1366	0	0	0	0	0	0	0	0	0	0	0	0	0	0	0	0	0	0	0	0	0	0	0	0	0	0	0	0	0	0	0	0	0	0	0	0	0	0	1	0	0	0	0	1	0	0	0	0	0
denovo1369	0	0	0	0	0	0	0	0	0	0	0	0	0	0	0	0	0	0	0	0	0	0	0	0	0	0	0	0	0	0	0	0	0	0	0	0	0	0	0	0	0	0	0	0	0	0	0	0	0
denovo1370	0	0	0	1	0	0	0	0	0	2	0	0	0	0	0	0	0	0	1	0	0	0	0	0	0	0	0	0	0	0	0	0	0	0	0	0	0	0	0	0	0	0	0	0	0	0	0	0	0
denovo1371	0	0	0	0	0	0	0	0	0	0	0	0	0	0	0	0	0	0	0	0	20	0	0	0	0	0	0	0	0	0	0	0	0	0	0	1	0	0	0	0	0	0	0	0	0	0	0	0	0
denovo1372	0	0	0	0	0	0	0	0	0	0	0	0	0	0	0	0	0	0	1	0	0	0	0	0	0	0	0	0	0	0	0	0	0	0	0	0	0	0	0	0	0	0	0	0	0	0	0	0	0
denovo1375	0	0	0	0	0	0	0	0	0	3	0	0	0	0	0	0	0	0	0	0	0	0	0	0	0	0	0	0	0	1	0	0	0	0	0	0	0	0	0	0	0	0	0	0	0	0	0	0	0
denovo1376	0	0	0	0	0	0	0	0	0	0	0	0	0	0	0	0	0	0	0	0	0	0	0	0	0	0	0	0	0	0	1	0	0	0	0	0	0	0	0	0	0	0	0	0	0	0	0	0	0
denovo1377	0	0	0	0	0	0	0	3	0	0	0	0	0	0	0	0	3	1	0	0	0	0	0	0	2	0	0	1	0	0	0	1	0	2	0	0	0	0	1	0	1	1	0	0	0	2	0	0	0
denovo1378	0	0	0	0	0	0	0	0	0	0	0	0	0	0	0	0	0	0	0	0	0	0	0	0	0	0	0	0	0	0	0	0	0	0	0	0	0	0	0	0	0	0	0	0	0	0	0	0	0
denovo1381	0	0	0	0	0	0	0	0	0	0	0	0	0	1	0	0	0	1	0	0	0	0	0	0	0	0	0	0	0	0	0	0	0	0	0	0	0	0	0	0	0	0	0	0	0	0	0	0	0
denovo1382	0	0	0	0	0	0	0	0	0	0	0	0	0	0	0	0	0	0	0	0	0	0	0	0	0	0	0	0	0	0	0	0	0	0	0	0	0	0	0	0	0	0	2	0	0	0	0	0	0
denovo1384	0	0	0	0	0	0	0	0	0	0	0	0	0	0	0	0	0	0	0	0	0	0	0	0	0	3	0	0	0	0	0	0	0	0	0	0	0	0	0	0	0	0	0	0	0	0	0	0	0
denovo1385	0	0	0	2	0	0	0	0	0	0	0	0	3	0	3	0	0	0	0	0	0	0	0	0	0	0	0	0	0	0	0	0	1	0	0	0	0	0	2	0	0	0	0	0	0	0	0	0	0
denovo1386	1	0	0	0	0	0	0	0	0	0	0	1	0	0	1	0	0	0	0	0	0	0	0	0	0	0	0	0	0	0	0	0	0	0	0	0	0	0	0	0	0	0	0	0	0	0	0	0	0
denovo1396	0	0	0	0	0	0	0	1	0	0	0	0	0	0	0	0	0	0	0	0	0	0	0	0	0	0	0	0	0	0	0	0	0	0	0	1	0	0	0	0	0	0	5	0	0	0	0	0	0
denovo1397	0	0	0	0	0	0	0	0	0	0	0	0	0	0	0	0	0	7	3	0	156	8	0	0	0	0	0	0	0	0	0	0	0	0	0	0	0	0	0	0	0	0	0	4	0	0	0	0	0
denovo1398	0	0	0	0	0	0	0	0	0	0	0	0	0	0	0	0	0	2	0	0	0	0	0	0	0	0	0	0	0	0	0	0	0	0	0	0	0	0	0	0	0	0	0	0	0	0	0	0	0
denovo1399	0	0	0	0	0	0	0	0	0	0	0	0	1	0	0	0	0	0	0	0	0	0	0	0	0	0	0	0	0	0	0	0	0	0	0	0	0	0	0	0	0	0	0	0	1	0	2	1	0
denovo1400	0	0	0	0	0	0	0	0	0	0	0	0	0	0	0	0	0	0	0	0	2	0	0	0	0	0	0	0	0	0	0	0	0	0	0	0	0	0	0	0	0	0	0	0	0	0	0	0	0
denovo1401	0	0	0	0	0	0	0	0	0	0	0	0	0	0	0	0	0	0	1	0	0	0	0	0	0	0	0	0	0	0	0	0	0	0	0	0	0	0	0	0	0	0	0	3	0	0	0	0	0
denovo1402	0	0	0	0	0	0	0	0	0	0	0	3	0	1	0	1	2	0	0	0	0	0	0	0	1	0	0	0	0	3	0	0	0	0	0	1	0	1	1	0	0	0	0	0	0	0	0	0	0
denovo1403	0	0	0	0	0	0	0	0	0	0	0	0	0	0	0	0	0	0	0	0	0	0	0	0	0	0	0	0	0	0	0	0	0	0	0	0	0	0	0	0	0	0	0	0	0	0	0	0	0
denovo1404	0	0	0	0	0	0	0	1	0	0	0	0	0	0	0	0	0	0	0	0	0	0	0	0	0	0	0	0	0	0	0	0	0	0	0	0	0	0	0	0	0	0	0	0	0	0	0	0	0
denovo1405	0	0	0	0	0	0	0	0	0	0	0	0	0	0	0	0	1	0	0	0	0	0	0	0	0	0	0	2	0	0	0	0	0	0	0	0	0	0	1	0	0	0	0	0	0	0	0	0	0
denovo1406	0	0	0	0	0	0	0	0	0	0	0	0	0	0	0	0	0	0	0	0	0	0	0	0	0	0	0	0	0	1	0	0	0	0	0	0	0	0	0	0	0	5	0	0	0	0	0	0	0
denovo1407	0	0	0	0	0	0	0	0	0	1	0	0	1	1	0	2	6	3	1	0	0	1	1	1	2	0	0	6	0	2	0	0	0	0	0	0	0	0	5	1	0	0	0	1	0	0	1	0	1
denovo1409	0	0	0	5	0	0	0	0	0	0	0	0	0	0	0	0	0	0	0	0	6	0	0	0	0	0	0	0	0	0	0	0	0	0	0	0	0	0	0	0	0	0	0	0	0	0	0	0	0
denovo1410	0	0	1	0	0	0	0	0	0	0	0	0	0	0	0	0	0	0	0	0	0	0	0	0	0	0	0	0	0	0	0	0	0	0	0	0	0	1	0	0	0	0	0	0	0	0	0	0	0
denovo1411	0	0	0	0	1	0	0	0	0	0	1	0	0	0	0	0	0	1	0	0	0	0	0	0	0	0	0	0	0	0	0	0	0	0	0	0	0	0	0	0	0	0	0	0	0	0	0	0	1
denovo1413	0	0	0	0	0	0	0	0	0	0	0	0	0	0	0	0	1	0	1	0	0	0	0	0	0	0	0	1	0	0	0	0	0	0	0	0	0	0	0	0	0	0	0	0	0	0	0	0	0
denovo1414	28	15	39	2	139	11	9	20	35	24	3	63	32	122	29	150	59	35	226	33	1	88	15	63	37	72	19	115	45	38	66	52	1	6	30	14	12	16	74	45	13	15	20	66	15	49	10	13	20
denovo1415	0	0	0	0	0	0	0	0	0	0	0	0	0	0	0	0	0	0	0	0	0	0	0	0	0	0	0	0	0	0	0	0	0	0	0	0	0	0	0	0	0	0	0	0	0	0	0	0	0
denovo1416	0	0	0	0	13	0	0	0	0	0	0	0	0	0	0	0	0	0	0	0	0	0	0	0	0	0	0	0	0	1	0	0	0	0	0	0	0	0	0	8	0	0	0	0	0	0	0	0	0
denovo1417	1	1	2	0	22	0	2	0	3	0	1	2	0	0	1	0	1	2	2	0	0	2	0	0	0	1	2	0	0	12	3	0	0	1	2	0	4	0	0	2	0	1	0	0	4	3	2	0	0
denovo1418	19	0	0	1	0	2	0	1	9	7	1	8	51	3	7	8	5	7	2	2	2	3	11	5	10	30	2	25	1	0	0	4	4	0	0	0	0	1	8	0	1	0	0	7	0	1	0	0	0
denovo1419	1	1	2	315	0	1	0	2	1	0	0	0	2	6	3	53	36	112	54	80	1259	12	1	71	5	1	0	124	90	0	0	2	0	0	0	0	0	1	29	1	2	0	1	245	0	1	3	0	0
denovo1420	21	14	37	0	6	21	2	35	8	34	1	4	19	8	12	4	0	12	5	1	0	6	2	6	2	2	4	11	1	4	6	5	1	18	15	5	9	5	2	3	10	16	26	12	1	6	10	9	8
denovo1421	0	0	0	0	0	1	0	0	0	0	0	0	0	0	0	0	0	0	0	0	0	0	0	0	0	0	0	2	0	0	0	0	0	0	0	0	0	0	0	1	0	0	0	0	0	0	0	0	1
denovo1422	1	0	2	4	8	0	1	1	0	1	0	5	1	1	1	2	8	5	2	1	0	2	0	2	3	1	1	3	0	6	8	2	0	1	1	0	0	0	13	1	0	7	3	8	0	3	1	2	1
denovo1423	0	0	0	0	0	0	0	0	0	0	0	0	0	0	0	0	0	0	0	0	14	0	0	0	0	0	0	0	0	0	0	0	0	0	0	0	0	0	0	0	0	0	0	0	0	0	0	0	0
denovo1424	0	0	0	0	0	0	0	0	0	0	2	0	0	0	0	1	0	0	1	0	0	0	0	0	0	1	0	0	0	0	0	0	0	0	0	0	0	0	0	0	0	0	0	1	0	0	0	0	0
denovo1425	0	0	0	1	0	0	0	0	0	0	0	0	1	1	0	0	1	6	1	1	2	0	0	3	2	0	0	2	0	0	0	0	0	0	0	0	0	0	1	0	0	0	0	2	0	0	0	0	0
denovo1427	0	0	0	1	0	0	0	0	0	0	0	0	0	0	0	0	0	2	0	0	0	0	0	0	0	0	0	0	3	0	0	0	0	0	0	0	0	0	0	0	0	0	0	1	0	0	0	0	0
denovo1428	3	1	0	0	0	5	10	6	6	0	0	1	0	0	2	0	0	0	0	0	0	0	0	0	0	21	1	0	0	0	0	0	0	14	6	2	0	0	0	0	0	6	0	0	0	19	1	1	0
denovo1429	0	0	1	0	0	1	0	2	5	0	0	0	0	0	0	0	0	0	0	0	0	0	0	0	0	3	0	0	0	1	0	0	0	0	0	0	1	2	0	2	0	0	0	0	0	0	1	0	0
denovo1430	0	0	0	0	0	0	0	0	0	0	0	0	0	2	0	11	3	3	2	3	0	3	0	2	0	0	0	6	0	0	0	19	0	0	0	0	0	0	6	0	0	0	0	0	0	0	0	0	0
denovo1431	0	0	0	0	0	0	0	0	0	0	1	0	0	0	1	0	0	0	0	0	1	0	0	0	0	0	0	0	0	0	0	0	0	0	0	0	0	0	0	0	0	0	0	0	0	0	0	0	0
denovo1432	0	0	0	0	0	0	0	0	0	0	0	0	0	0	0	0	0	0	0	0	0	0	0	0	0	0	0	0	0	0	0	0	0	0	0	0	0	0	0	0	0	0	0	0	2	0	0	0	0
denovo1434	0	0	0	0	0	0	3	2	0	0	0	0	0	0	0	0	0	0	0	0	0	0	0	0	0	0	0	0	0	0	0	0	0	0	0	0	1	0	0	0	0	0	0	0	0	0	0	1	0
denovo1435	0	0	0	0	0	0	0	0	0	0	0	0	0	0	0	0	0	0	0	0	0	0	2	0	0	0	0	0	0	0	0	0	0	0	0	0	0	0	0	0	0	0	0	0	0	0	0	0	0
denovo1438	0	0	0	1	0	0	0	0	1	1	0	0	10	5	0	0	0	0	0	0	1	0	0	0	0	0	0	1	0	0	0	2	0	0	0	0	1	0	0	0	0	0	1	3	0	0	0	0	0
denovo1439	0	0	1	0	2	0	0	0	0	0	0	0	0	0	1	0	0	0	1	0	0	0	0	0	0	0	0	0	0	5	1	0	0	0	0	0	0	0	0	0	0	0	1	0	1	0	4	0	2
denovo1440	0	0	0	0	0	0	0	0	0	0	0	0	0	2	0	1	0	0	3	0	0	0	0	0	0	0	0	0	0	0	0	0	0	0	0	0	0	0	0	0	0	0	0	1	0	0	0	0	0
denovo1441	0	0	0	0	0	0	0	0	0	0	0	0	0	0	0	0	0	0	0	0	0	0	0	0	0	0	0	0	0	0	0	0	0	0	0	0	0	0	0	0	0	0	0	0	0	0	0	0	0
denovo1442	0	0	0	2	0	0	0	0	0	0	0	0	0	0	0	0	0	0	0	0	4	0	0	0	0	0	0	0	0	0	0	0	0	0	0	0	0	0	0	0	0	0	0	0	0	0	0	0	0
denovo1443	0	0	0	35	0	0	0	0	0	0	0	0	0	0	0	2	0	1	0	0	0	0	0	0	0	0	0	0	0	0	0	0	0	0	0	0	0	0	0	0	0	0	0	0	0	2	0	0	0
denovo1444	0	0	0	0	0	0	0	0	0	2	0	0	0	0	0	1	0	0	0	0	0	0	0	0	1	0	0	0	0	0	0	0	0	0	0	0	0	0	0	0	0	0	0	0	0	0	0	0	0
denovo1446	0	0	0	0	0	0	0	0	0	0	0	0	0	0	0	0	0	2	0	0	0	0	0	0	0	0	0	0	0	0	0	0	0	0	0	0	0	0	0	0	0	0	0	0	0	0	0	0	0
denovo1447	0	0	0	0	0	0	0	0	0	0	0	0	0	0	0	0	0	1	0	0	0	0	0	0	0	0	0	0	0	0	0	0	0	0	0	0	0	0	0	0	0	0	0	0	0	0	0	0	0
denovo1448	0	0	0	0	0	0	0	0	0	0	0	0	0	0	0	0	0	0	0	0	0	0	0	1	0	0	0	0	0	0	0	0	0	0	0	0	0	0	0	0	0	0	0	0	0	0	0	0	0
denovo1450	0	0	0	0	0	0	0	1	0	0	0	0	0	0	0	0	0	0	0	0	0	1	0	0	0	0	0	0	0	0	0	0	0	0	0	0	0	0	0	0	0	0	0	0	0	0	0	0	0
denovo1451	0	0	0	0	0	0	0	0	0	0	0	0	0	0	0	0	0	3	0	0	1	0	0	0	0	0	0	0	0	0	0	0	0	0	0	0	0	0	0	0	0	0	0	0	0	0	0	0	0
denovo1452	0	0	0	0	0	0	0	0	0	0	0	0	0	0	0	0	0	6	0	0	0	0	0	2	0	0	0	2	1	0	0	0	0	0	0	0	0	0	0	0	0	0	0	0	0	0	0	0	0
denovo1453	0	0	0	0	0	0	0	0	5	0	0	0	0	0	0	0	0	0	0	0	0	0	0	0	0	0	0	0	0	0	0	0	0	0	0	0	0	0	0	0	0	0	0	0	0	0	0	0	0
denovo1454	0	1	0	0	5	1	0	1	2	0	0	3	0	0	1	0	0	0	0	0	0	0	0	0	0	0	0	0	0	1	4	2	0	1	0	1	0	1	0	1	0	0	0	0	1	0	0	3	0
denovo1455	0	0	0	0	0	0	0	0	0	0	0	0	0	0	0	0	0	0	5	0	0	2	0	2	0	0	0	1	0	0	0	0	0	0	0	0	0	0	0	0	3	0	2	0	0	0	2	0	0
denovo1456	0	0	0	0	0	0	0	0	2	0	0	0	0	0	0	0	0	0	0	0	0	0	0	0	0	0	0	0	0	0	0	0	0	0	0	0	0	0	0	0	0	0	0	0	0	0	0	0	0
denovo1457	0	0	0	0	0	0	0	0	0	0	0	0	0	0	0	0	0	0	0	0	0	0	0	0	0	0	0	0	0	0	0	0	0	0	4	1	0	0	0	0	0	1	0	0	0	0	0	1	0
denovo1458	0	0	0	1	2	0	0	0	0	0	0	0	0	0	0	0	0	0	0	0	0	0	0	0	2	0	0	0	2	0	0	0	0	1	0	0	0	0	0	0	0	0	0	0	0	3	0	0	0
denovo1459	0	0	0	6	0	0	0	0	0	0	0	0	0	0	0	0	0	0	0	0	7	0	0	0	2	0	0	1	0	0	0	0	0	0	0	0	0	0	0	0	0	0	0	0	0	0	0	0	0
denovo1461	0	0	0	0	0	0	0	0	0	0	0	0	0	2	0	0	0	0	0	0	0	0	0	0	0	0	0	0	0	0	0	0	0	0	0	0	0	0	0	0	0	0	0	0	0	0	0	2	0
denovo1462	0	0	0	0	0	0	0	0	0	0	0	1	0	0	0	0	0	0	0	0	0	0	0	0	0	0	0	0	0	0	1	0	0	0	0	1	0	0	0	0	0	0	0	0	0	0	0	0	0
denovo1463	0	0	0	0	0	0	0	0	0	0	0	0	1	0	0	0	0	0	0	0	0	0	0	0	0	0	0	0	0	0	0	0	0	0	0	0	0	0	0	0	0	0	0	0	0	0	0	0	0
denovo1464	0	0	0	1	0	0	0	0	0	0	0	1	0	0	0	0	0	0	0	0	0	0	0	0	0	1	0	0	0	0	1	0	0	0	0	0	0	0	0	0	0	0	0	0	0	0	0	0	0
denovo1466	0	0	0	0	0	0	0	0	0	0	0	0	0	0	0	0	0	0	0	0	0	0	0	1	0	0	0	0	0	0	0	0	0	0	0	0	0	0	0	0	0	0	0	0	0	0	0	0	0
denovo1467	0	0	0	6	0	0	0	0	0	1	0	0	2	0	0	2	0	3	1	0	34	0	0	0	0	0	0	1	0	0	0	0	0	0	0	0	0	0	0	0	1	0	0	2	0	0	0	0	0
denovo1469	1	1	0	0	0	0	0	0	0	0	0	1	0	0	0	0	0	0	0	0	0	0	0	0	0	0	0	0	0	2	0	0	0	0	0	0	0	0	0	0	0	0	0	0	0	0	0	0	0
denovo1470	0	0	0	0	0	0	0	0	0	2	0	0	0	4	0	14	13	0	1	6	0	11	10	10	0	0	1	2	0	0	0	0	0	0	0	0	1	0	12	0	9	0	0	0	0	0	0	0	0
denovo1471	0	0	0	0	0	0	0	0	0	3	0	0	0	0	0	0	0	0	0	0	0	0	0	0	0	0	0	0	0	0	0	0	0	0	0	0	0	0	0	0	0	0	0	0	0	0	0	0	0
denovo1472	0	0	0	0	0	0	1	0	0	0	0	0	0	0	0	0	0	0	0	0	0	0	0	0	0	0	0	0	0	0	0	0	0	0	0	0	0	0	0	0	0	0	0	0	0	0	0	0	0
denovo1473	1	0	0	1	0	0	0	0	3	0	0	0	0	0	2	0	0	1	1	0	0	0	0	1	0	0	0	0	0	0	0	0	0	0	0	0	0	0	1	0	0	1	2	0	0	0	0	0	0
denovo1474	0	0	0	0	0	0	0	0	0	0	0	0	0	3	0	1	2	1	0	0	0	1	1	1	1	0	0	0	2	0	0	0	0	0	0	0	0	0	1	0	0	0	0	1	0	0	0	0	0
denovo1475	0	0	0	4	1	0	0	0	0	3	0	0	0	0	0	1	0	2	2	0	6	0	0	2	0	0	0	1	0	0	0	0	0	1	0	1	0	0	0	1	0	0	0	0	0	0	0	0	0
denovo1476	7	2	1	3	8	0	7	9	7	3	1	9	4	1	10	5	0	6	1	1	0	7	3	4	0	0	4	4	0	21	6	6	9	4	10	4	13	2	8	4	2	5	0	1	11	9	5	13	6
denovo1477	0	0	0	0	0	0	0	0	0	0	0	0	0	0	0	0	1	0	1	1	0	0	0	0	0	0	0	0	0	0	0	0	0	0	1	0	0	0	0	0	0	1	0	0	0	1	0	0	0
denovo1478	0	0	0	0	0	2	0	0	0	0	0	0	0	0	0	0	0	0	0	0	0	0	0	0	0	0	0	0	0	0	0	0	0	0	0	0	0	0	0	0	0	0	0	2	0	1	0	0	3
denovo1480	0	0	0	0	0	0	0	0	0	0	0	1	1	0	0	0	0	0	0	0	0	0	0	0	0	0	0	0	0	0	0	0	0	0	0	0	0	0	0	0	0	0	0	0	0	0	0	0	0
denovo1481	0	0	0	0	0	0	1	3	1	0	0	0	0	0	0	3	0	1	0	0	0	0	0	1	3	1	0	0	0	0	2	0	3	1	0	0	0	0	0	0	0	0	0	0	0	0	0	0	3
denovo1482	0	1	0	1	0	0	0	0	0	0	0	0	0	0	0	1	0	0	0	0	0	0	0	0	0	0	0	0	0	0	0	0	0	0	0	0	0	0	0	0	0	0	0	0	0	0	0	0	0
denovo1484	0	0	0	0	0	0	0	0	0	0	0	0	0	0	0	0	0	0	0	0	0	2	0	0	0	0	0	0	0	0	0	0	0	0	0	0	0	0	0	0	0	0	0	0	0	0	0	0	0
denovo1485	0	0	0	0	0	0	0	0	0	0	0	0	0	0	0	0	0	0	0	0	0	0	0	0	0	0	0	0	0	0	0	0	0	0	0	0	0	0	0	0	0	0	0	0	0	0	0	0	0
denovo1487	0	0	1	0	0	0	0	0	0	0	0	0	0	1	0	0	0	0	0	0	0	0	0	0	0	0	0	0	0	0	0	0	0	0	4	0	0	0	0	0	0	0	0	0	0	0	0	2	1
denovo1488	0	0	0	2	0	0	0	0	0	0	0	0	0	0	0	0	0	0	0	0	0	0	0	0	0	0	0	0	0	0	0	0	0	0	0	0	0	0	0	0	0	0	0	0	0	0	0	0	0
denovo1489	0	0	0	0	0	0	0	3	0	0	0	2	0	0	0	5	3	0	0	2	0	4	0	2	4	1	0	1	13	0	0	22	0	0	0	0	0	0	1	0	0	0	0	0	0	0	0	0	0
denovo1491	0	0	0	0	0	0	0	0	0	0	0	0	0	0	0	0	1	1	0	0	0	0	0	0	0	0	0	1	0	0	0	0	0	0	0	0	0	0	0	0	0	0	0	0	0	0	0	0	0
denovo1492	0	0	0	1	0	0	0	2	0	1	0	0	0	0	0	1	1	0	0	1	0	0	0	0	0	1	0	3	0	0	0	0	0	0	6	2	0	0	2	0	0	2	0	0	0	2	0	1	0
denovo1493	0	0	0	0	0	0	0	0	0	0	0	0	0	0	0	0	0	0	0	0	1	0	0	0	0	0	0	0	2	0	0	0	0	0	0	0	0	0	0	0	0	0	0	0	0	0	0	0	0
denovo1494	0	0	0	0	0	0	0	0	0	0	0	0	0	0	0	0	0	0	0	0	0	0	0	0	0	0	0	0	0	0	0	0	0	0	0	0	0	0	0	0	0	0	0	0	0	0	0	0	0
denovo1497	0	0	0	0	0	0	0	0	0	0	0	0	1	0	0	0	0	0	0	0	0	0	0	0	0	0	0	1	0	0	0	0	0	0	0	0	0	0	0	0	0	1	0	0	0	0	0	0	0
denovo1499	0	0	0	0	0	0	0	0	0	0	0	1	0	0	1	0	0	0	0	0	0	0	0	0	0	0	0	0	0	0	2	0	0	0	0	0	0	0	0	0	0	0	0	0	0	0	0	0	0
denovo1501	0	0	0	0	0	0	0	0	0	0	0	0	0	0	0	0	0	0	0	0	0	0	0	0	0	0	0	0	0	0	0	0	0	0	3	0	0	0	0	0	0	1	0	0	0	0	0	0	0
denovo1502	0	0	0	2	0	0	0	0	0	0	0	0	0	0	0	0	0	1	0	0	3	0	0	0	0	0	0	0	0	0	0	0	0	0	0	0	0	0	0	0	0	0	0	0	0	0	0	0	0
denovo1503	0	0	0	0	0	0	0	0	0	0	0	0	0	0	0	0	0	0	1	0	0	0	0	0	0	0	0	1	0	0	0	0	0	0	0	0	0	0	0	0	0	0	0	0	0	0	0	0	0
denovo1504	0	0	0	4	0	0	0	0	0	3	0	0	7	1	0	3	0	0	2	0	2	2	0	2	4	0	0	1	1	0	0	0	0	0	0	0	0	0	0	0	7	0	0	0	0	0	0	0	0
denovo1505	0	0	0	2	0	0	0	0	0	0	0	0	0	0	0	0	0	0	0	0	0	0	0	0	0	0	0	0	0	0	0	0	0	0	0	0	0	0	0	0	0	0	0	0	0	0	0	0	0
denovo1506	0	0	1	0	0	0	0	3	0	1	0	0	1	0	6	1	0	0	0	0	0	0	0	0	0	3	0	1	0	0	0	0	0	0	0	0	2	0	0	0	1	0	1	1	0	1	0	0	2
denovo1507	0	0	1	0	1	0	0	0	0	0	1	0	1	0	1	1	0	0	0	1	0	0	1	0	1	0	0	0	7	0	0	2	0	0	0	0	0	0	2	0	0	0	0	0	0	2	0	0	0
denovo1508	0	0	0	0	0	0	0	0	0	0	0	0	0	0	0	0	0	0	0	0	0	0	0	0	0	0	0	0	0	0	0	0	0	0	1	0	0	0	0	0	0	0	0	0	0	0	0	0	0
denovo1509	1	0	0	0	0	0	0	0	1	0	0	0	0	0	0	0	0	0	0	0	0	0	0	0	0	0	0	0	0	0	0	0	0	0	0	0	0	0	0	0	0	0	0	0	0	0	0	0	0
denovo1510	1	1	1	1	2	0	1	1	1	0	1	3	1	1	1	2	1	0	3	0	0	0	0	1	1	0	0	0	0	1	2	0	0	1	1	2	0	0	0	2	0	0	0	1	0	4	0	0	0
denovo1511	0	0	0	0	0	0	0	0	0	0	0	0	1	3	0	1	1	4	35	0	0	4	0	3	0	0	0	10	9	0	0	4	0	0	0	0	0	0	0	0	1	0	0	2	0	0	0	0	0
denovo1512	0	0	0	0	0	0	0	0	0	0	0	0	0	0	0	0	0	0	0	0	2	0	0	0	0	0	0	0	0	0	0	0	0	0	0	0	0	0	0	0	0	0	0	0	0	0	0	0	0
denovo1513	2	0	8	0	5	14	2	10	0	1	1	6	9	12	2	4	3	3	1	0	1	6	2	0	2	2	0	1	1	11	1	1	7	4	9	1	0	0	0	3	1	2	7	2	9	14	1	17	9
denovo1514	0	0	0	0	3	0	18	4	0	4	0	0	0	2	0	0	2	3	0	2	3	2	0	1	6	0	1	8	2	0	0	0	1	8	1	0	0	0	10	2	0	3	0	0	0	15	0	3	0
denovo1515	0	0	0	0	0	0	0	0	0	0	0	0	0	0	0	0	0	0	0	0	2	0	0	1	0	0	0	0	0	0	0	0	0	0	0	0	0	0	0	0	0	0	0	0	0	0	0	0	0
denovo1516	0	0	0	2	0	0	0	0	0	3	0	0	0	0	0	0	0	0	0	0	4	0	0	2	0	0	0	0	0	0	0	0	0	0	0	0	0	0	1	0	1	0	0	6	0	0	0	0	0
denovo1518	0	0	0	11	0	0	0	0	0	0	0	0	0	0	0	0	0	0	0	0	1	0	0	0	0	0	0	0	0	0	0	0	0	0	0	0	0	0	0	0	0	0	0	0	0	0	0	0	0
denovo1519	0	1	0	0	0	0	0	0	2	0	0	0	0	0	1	0	0	0	0	0	0	0	0	0	0	1	0	0	0	0	0	0	0	0	0	0	0	0	0	0	0	0	0	0	0	0	0	0	0
denovo1520	0	0	0	0	0	0	0	0	1	0	0	0	0	1	0	0	0	0	0	0	0	0	1	0	0	0	0	0	0	0	0	0	0	0	0	0	2	0	1	0	0	0	0	5	0	0	0	0	0
denovo1521	1	0	0	0	0	2	0	0	3	5	0	1	0	0	1	0	0	0	0	0	0	0	0	0	0	0	2	0	0	0	0	0	0	0	0	0	0	0	0	2	2	0	0	0	0	1	0	0	1
denovo1522	0	0	0	1	0	0	0	0	0	0	0	0	0	0	0	0	0	0	0	0	1	0	0	0	0	3	0	0	0	0	0	0	0	0	1	0	0	0	0	0	0	0	0	0	0	0	0	0	0
denovo1523	0	1	0	0	3	0	1	2	4	2	0	2	0	0	4	3	0	0	0	0	1	0	0	0	0	0	1	1	0	6	0	0	1	0	5	1	1	0	2	0	0	0	1	0	2	0	0	1	0
denovo1524	0	0	0	0	0	8	0	3	3	0	0	0	0	0	0	0	0	0	0	0	0	0	0	0	0	1	0	0	0	0	0	0	0	0	0	1	0	0	0	0	0	3	4	0	0	0	0	0	0
denovo1528	0	0	0	0	0	0	0	0	0	0	0	0	0	1	0	10	0	0	0	0	0	1	0	0	0	0	0	0	0	0	0	0	0	0	0	0	0	0	0	0	0	0	0	1	0	0	0	0	0
denovo1530	0	0	1	0	1	0	3	2	0	0	0	3	2	1	0	0	0	1	3	0	0	0	1	1	1	0	1	0	1	1	0	1	0	0	2	2	0	0	1	0	0	1	0	0	1	1	0	1	1
denovo1531	0	0	0	0	0	0	0	0	0	0	0	0	0	0	1	1	3	0	0	0	0	0	0	0	0	0	1	0	0	0	0	0	0	0	0	0	0	0	0	0	0	2	0	0	0	0	0	0	0
denovo1532	0	0	0	0	0	3	2	0	0	1	1	1	0	3	0	4	2	0	6	5	0	0	2	1	6	11	0	2	0	1	0	0	2	1	0	0	0	1	4	0	0	0	0	1	0	1	0	0	0
denovo1534	0	0	0	0	0	0	0	0	0	0	0	0	0	1	0	0	0	0	0	1	0	2	0	0	0	0	0	0	1	0	0	0	0	0	0	0	0	0	0	0	0	0	0	1	0	0	0	0	0
denovo1536	0	0	0	0	1	0	0	0	0	0	0	0	0	0	0	0	0	0	0	0	2	0	0	0	0	0	0	0	0	1	0	0	0	0	1	0	0	0	0	0	0	0	0	0	0	0	0	0	0
denovo1537	0	0	0	0	1	0	0	0	0	0	0	0	0	0	1	0	0	0	0	0	0	0	0	0	0	0	0	0	0	0	0	0	0	0	2	0	0	0	0	0	0	0	0	0	0	0	0	0	0
denovo1538	0	0	0	0	0	0	0	0	0	0	0	0	0	0	0	0	0	0	0	0	0	0	0	0	0	0	0	0	0	0	0	0	0	0	5	0	0	0	0	0	0	0	0	0	0	0	0	0	0
denovo1539	1	0	0	0	0	0	0	0	0	0	0	0	0	0	0	0	0	3	3	0	0	1	0	2	0	0	0	0	1	0	0	0	0	0	0	0	0	0	1	0	0	0	0	0	1	0	0	0	0
denovo1540	0	0	0	0	4	1	1	5	0	0	1	0	0	0	0	1	0	0	1	0	0	0	0	0	0	4	0	0	0	2	0	0	0	0	1	1	0	0	1	4	0	1	0	0	2	0	0	2	1
denovo1542	0	0	0	0	0	0	0	0	0	0	0	0	0	0	0	0	0	0	0	0	3	1	0	0	0	0	0	0	0	0	0	0	0	0	0	0	0	0	0	0	0	0	0	0	0	0	0	0	0
denovo1543	0	0	0	0	1	0	0	0	0	0	0	0	0	0	0	0	0	0	0	0	0	0	0	0	0	0	0	0	0	0	0	0	0	0	0	0	0	0	0	0	0	0	0	0	0	0	0	0	0
denovo1544	2	2	0	0	2	1	4	2	1	0	1	1	0	0	1	0	0	0	0	0	0	0	0	0	0	3	0	0	0	3	3	0	0	0	1	1	1	1	0	0	0	1	2	0	0	0	0	0	0
denovo1545	0	0	0	0	0	0	0	0	0	0	0	0	0	0	0	0	0	0	0	0	0	0	0	0	0	0	0	0	0	0	0	0	0	0	0	0	0	0	0	0	0	0	1	0	0	0	0	0	0
denovo1546	0	1	0	0	6	0	2	1	1	0	0	0	1	0	2	0	1	0	1	0	0	1	1	0	2	0	4	0	0	0	1	0	1	0	4	2	3	0	0	1	0	1	0	0	1	1	0	2	0
denovo1547	0	0	0	0	0	0	0	0	0	1	0	0	0	0	0	0	0	0	0	0	0	0	0	0	0	0	0	0	0	0	0	0	0	1	0	3	0	0	0	0	0	2	0	0	0	0	0	0	0
denovo1548	0	0	0	0	0	0	0	0	0	0	0	0	0	0	0	0	0	0	0	0	0	0	0	0	0	0	0	0	0	0	0	0	0	0	0	0	0	0	0	0	0	0	0	0	0	1	0	0	0
denovo1549	0	0	0	0	1	0	0	2	0	0	0	1	0	0	0	0	0	0	0	0	0	0	0	0	0	0	0	0	0	1	0	0	1	3	0	0	0	0	0	0	0	0	0	0	0	0	0	1	3
denovo1552	0	0	0	0	2	0	1	1	0	0	0	0	2	0	0	2	0	0	0	0	0	0	0	0	0	0	0	0	0	0	0	0	0	0	0	2	0	0	0	1	0	0	0	0	0	1	0	1	0
denovo1553	0	0	0	0	0	0	0	0	0	0	0	0	0	0	0	0	0	0	0	0	0	0	0	0	0	0	0	0	0	1	1	0	0	0	0	0	0	0	0	0	0	0	0	0	0	0	0	0	0
denovo1554	0	0	0	0	0	0	0	0	0	0	0	0	0	0	0	0	0	0	0	0	0	0	0	0	0	0	0	0	3	0	0	0	0	0	0	0	0	0	0	0	0	0	0	0	0	0	0	0	0
denovo1557	0	0	0	0	0	0	0	0	0	0	0	0	0	0	0	0	0	0	0	0	0	0	0	0	0	0	0	2	0	0	0	0	0	0	0	0	0	0	0	0	0	0	0	0	0	0	0	0	0
denovo1558	0	0	0	0	0	0	0	0	0	0	0	0	0	0	0	0	0	0	0	0	2	0	0	0	0	0	0	0	0	0	0	0	0	0	0	0	0	0	0	0	0	0	0	0	0	0	0	0	0
denovo1560	0	0	0	0	0	0	0	0	0	0	0	0	1	4	0	1	0	0	0	0	0	1	0	0	3	0	1	1	0	0	0	1	0	0	0	0	0	0	1	0	0	0	0	5	0	0	0	0	0
denovo1562	0	0	0	0	0	0	0	1	0	0	0	0	0	0	0	0	0	1	0	0	0	0	0	0	0	0	0	0	0	2	0	0	0	0	2	0	0	0	0	0	0	0	0	0	0	0	0	7	0
denovo1563	2	0	1	0	0	0	6	3	0	0	0	0	0	8	0	2	5	1	45	3	1	1	6	4	5	3	1	5	19	0	0	4	1	6	14	4	2	2	12	2	0	2	0	20	1	25	1	7	0
denovo1564	0	0	0	0	0	0	0	0	0	0	0	0	0	0	0	0	0	0	0	0	0	0	0	0	0	0	0	0	0	0	0	0	0	0	0	0	0	0	1	0	0	0	0	0	0	0	0	0	0
denovo1565	0	0	0	0	0	0	1	0	0	0	0	0	0	0	0	0	0	0	0	0	0	0	0	0	0	0	1	0	0	0	0	0	1	0	0	0	0	0	0	0	0	0	0	0	0	0	0	0	0
denovo1566	1	0	0	0	0	0	0	3	0	0	0	0	0	0	0	0	0	0	0	0	0	0	0	0	0	0	0	0	0	0	0	0	3	0	1	0	0	0	0	0	0	0	0	0	0	0	0	0	0
denovo1571	1	0	0	0	0	0	0	0	0	0	0	1	13	0	0	0	0	0	0	0	0	0	0	0	0	0	0	0	0	0	0	0	0	0	0	0	0	0	0	0	0	0	0	0	0	0	0	0	0
denovo1572	0	0	0	0	0	0	0	0	0	0	0	0	0	0	0	0	0	0	0	0	0	0	0	0	0	0	0	0	0	0	0	0	0	0	0	0	0	0	0	0	0	0	0	0	0	2	0	0	0
denovo1575	11	4	18	1	71	24	23	27	22	26	4	42	39	60	7	11	8	10	80	7	3	14	6	14	25	162	32	44	31	70	30	11	6	10	37	22	10	11	28	18	6	19	16	75	2	57	17	7	27
denovo1576	0	0	0	0	2	1	0	2	0	0	0	2	0	1	0	1	1	0	1	0	0	0	0	1	1	0	0	6	0	0	0	1	0	0	1	0	0	0	0	0	4	2	0	0	0	0	0	0	0
denovo1577	1	0	1	0	0	1	0	0	0	0	0	0	0	0	0	0	0	0	0	0	0	0	0	0	0	0	0	1	1	0	0	0	0	0	0	0	3	0	0	0	0	0	0	0	0	0	0	0	0
denovo1578	0	0	0	0	0	0	0	0	0	0	0	0	0	0	0	0	0	0	0	0	1	0	0	0	0	0	0	0	0	0	0	0	0	0	0	0	0	0	0	0	0	0	0	0	0	0	0	0	0
denovo1580	0	0	0	0	0	0	0	0	0	0	0	0	0	0	0	2	0	1	0	0	0	0	0	0	0	0	0	0	0	0	0	0	0	0	0	0	0	0	0	0	0	0	0	1	0	0	0	0	0
denovo1581	0	0	0	0	0	0	0	0	0	0	1	0	0	0	0	0	0	0	0	0	0	0	0	2	0	0	0	3	0	0	0	0	0	0	0	0	0	0	0	0	0	0	0	0	0	0	0	0	0
denovo1582	1	2	1	0	0	0	1	0	16	1	0	0	0	0	1	0	0	0	0	0	0	0	0	0	0	0	0	0	0	0	0	0	0	0	0	0	4	1	0	0	0	0	0	0	0	0	0	0	0
denovo1584	1	0	1	0	1	0	1	2	3	0	0	1	0	0	0	0	0	0	0	0	0	0	0	0	0	0	0	0	0	0	1	0	0	0	1	0	3	0	0	0	0	1	1	0	1	0	2	0	0
denovo1585	0	0	0	0	0	0	0	1	0	0	0	0	0	0	0	0	0	0	0	0	0	0	0	0	0	0	0	0	0	0	0	0	0	0	0	0	0	0	0	0	0	0	1	0	0	0	0	0	1
denovo1586	0	0	0	0	0	0	0	0	0	0	0	0	0	0	0	0	0	0	0	0	0	0	0	0	0	0	0	0	0	0	0	0	0	0	0	0	0	0	0	0	0	0	4	0	0	0	0	0	0
denovo1587	4	1	7	4	6	1	3	5	1	4	4	4	2	6	2	4	0	1	6	2	1	5	0	0	1	1	3	5	1	8	3	0	4	3	5	3	1	2	4	3	0	1	1	1	3	5	4	2	5
denovo1588	0	0	0	0	0	0	0	0	0	0	0	0	0	0	0	0	0	0	0	0	2	0	0	0	0	0	0	0	0	0	0	0	0	0	0	0	0	0	0	0	0	0	0	0	0	0	0	0	0
denovo1589	0	0	0	0	0	0	0	0	0	0	0	0	0	6	0	0	0	1	1	0	0	1	0	0	0	0	3	3	0	0	0	0	0	0	0	1	0	0	0	0	0	0	0	1	0	0	0	0	0
denovo1592	0	0	1	0	1	0	1	1	0	1	0	0	0	0	0	0	0	0	0	0	0	0	0	1	0	2	1	3	0	0	0	0	0	0	0	0	0	0	0	0	1	0	0	0	0	0	0	0	0
denovo1593	0	0	0	0	0	5	0	0	0	0	0	0	0	0	0	0	0	0	0	0	0	0	0	0	0	0	0	0	0	0	0	0	0	0	0	0	0	0	0	0	0	0	0	0	0	0	0	0	0
denovo1594	0	0	0	0	0	0	0	0	0	0	0	0	0	0	0	0	0	0	0	0	0	0	0	0	0	0	1	0	0	0	0	1	0	0	0	0	0	0	3	0	0	0	0	0	0	0	0	0	0
denovo1595	2	0	0	0	0	0	0	0	0	0	0	0	0	0	0	0	0	0	0	0	0	0	0	0	0	0	0	0	0	0	0	0	0	0	0	0	0	0	0	0	0	0	0	0	0	0	0	0	0
denovo1596	0	0	0	0	2	0	0	0	0	0	0	0	0	0	0	0	0	0	0	0	0	0	0	0	0	0	0	0	0	0	0	0	0	0	0	0	0	0	0	0	0	0	0	0	0	0	0	0	0
denovo1598	0	0	0	0	0	0	0	1	0	0	0	0	0	0	0	0	0	0	0	0	0	0	0	0	0	0	0	0	0	1	0	0	0	0	0	0	1	0	0	0	0	0	0	0	0	0	0	0	0
denovo1599	0	0	0	0	0	0	1	1	0	2	1	0	0	1	0	1	0	0	6	0	0	0	0	0	0	0	1	0	0	1	4	0	0	0	0	0	0	0	0	0	0	1	1	0	0	1	1	0	4
denovo1600	0	0	1	0	2	0	2	2	0	0	0	0	2	1	1	0	0	0	1	0	0	3	0	0	0	2	0	1	2	1	0	0	1	0	5	3	0	0	0	2	0	2	1	0	0	2	11	0	0
denovo1601	0	0	0	0	0	0	0	0	0	0	0	0	0	0	0	0	0	0	0	0	2	0	0	0	0	0	0	0	0	0	0	0	0	0	0	0	0	0	0	0	0	0	0	0	0	0	0	0	0
denovo1602	0	0	2	0	0	0	0	0	0	1	1	0	0	0	0	0	0	0	0	0	0	0	0	0	0	1	0	0	0	1	0	0	0	0	0	0	1	0	1	0	1	0	1	0	0	0	1	0	0
denovo1606	0	0	0	0	0	0	0	0	0	0	0	0	0	0	0	0	0	0	0	0	0	0	0	0	0	0	1	0	0	0	0	0	0	0	0	0	0	0	0	0	0	0	0	0	0	0	0	0	0
denovo1607	0	0	0	0	0	0	0	0	0	0	0	1	0	0	0	0	0	0	0	0	0	0	0	0	0	0	0	0	0	0	0	0	0	0	0	0	0	0	0	0	0	1	0	0	0	0	2	0	0
denovo1608	0	0	1	0	0	0	0	0	0	0	0	0	0	0	2	0	0	0	0	2	0	0	0	0	0	0	0	0	0	0	0	0	0	0	1	0	0	0	0	0	0	0	0	0	0	0	0	0	0
denovo1609	3	0	0	0	2	0	1	0	0	0	0	0	0	0	1	0	0	0	0	0	0	0	0	0	0	0	0	0	0	0	1	0	1	1	0	1	2	0	1	0	0	0	0	0	2	0	1	0	0
denovo1611	0	0	0	0	0	0	0	0	0	0	0	0	0	0	0	0	0	0	0	0	0	0	0	0	0	1	0	0	0	0	0	0	0	0	0	0	0	0	0	0	0	0	0	0	0	0	0	0	0
denovo1612	0	0	0	0	0	0	0	0	0	0	0	0	0	0	0	0	0	0	0	0	0	0	0	0	0	0	0	0	0	0	0	0	1	0	0	0	0	0	0	0	0	0	0	0	0	1	3	0	0
denovo1613	0	0	0	0	0	0	0	0	0	0	0	0	0	0	2	0	0	0	0	0	0	0	0	0	0	0	0	0	0	0	0	0	0	0	0	0	0	0	0	0	0	0	0	0	0	0	0	0	0
denovo1614	0	0	1	2	8	0	5	12	0	26	0	9	0	4	0	8	10	11	4	5	2	6	3	7	11	0	2	22	3	8	0	1	2	4	10	8	0	1	15	4	3	4	0	3	1	4	1	1	1
denovo1615	0	0	0	0	0	0	0	2	0	0	0	0	0	0	0	0	0	0	0	0	0	0	0	0	0	0	0	0	0	0	0	0	0	1	0	0	0	0	0	0	0	0	0	0	0	0	0	1	0
denovo1616	0	0	1	0	7	0	0	0	0	0	0	0	0	0	0	4	2	0	2	0	0	0	0	0	5	1	1	0	0	0	0	0	0	0	0	0	0	0	0	2	0	2	4	0	0	0	1	0	0
denovo1618	0	0	0	0	0	0	0	0	0	0	0	0	1	0	0	25	6	1	20	4	0	1	0	1	80	0	0	3	10	0	0	1	0	0	1	0	0	0	3	0	0	0	0	1	0	0	0	0	0
denovo1619	15	1	8	0	13	2	4	22	4	24	3	5	0	1	6	12	21	9	7	11	2	15	18	11	0	0	39	6	2	2	0	8	6	1	27	26	3	0	20	3	13	40	0	0	4	53	8	4	0
denovo1620	1	1	2	0	8	7	3	3	9	4	1	3	3	0	1	1	2	2	4	1	0	0	0	0	0	1	5	0	0	3	4	0	0	3	0	1	2	0	3	1	2	1	5	1	1	12	2	0	1
denovo1621	0	0	0	0	0	0	0	3	0	2	0	0	0	2	0	0	0	1	0	0	0	0	0	0	0	0	13	1	0	0	0	0	0	0	0	0	0	0	0	0	0	0	0	0	0	0	0	0	0
denovo1622	3	1	2	0	0	0	0	1	9	1	9	5	6	0	10	2	1	0	0	0	0	1	0	0	0	0	0	1	0	1	2	1	1	0	0	0	6	0	1	0	1	0	1	0	0	0	4	0	0
denovo1623	0	0	0	0	0	0	2	1	0	1	0	0	0	0	0	0	0	0	1	0	0	2	0	1	0	0	0	5	0	0	0	0	0	0	1	0	0	0	0	0	0	0	0	0	0	0	0	1	0
denovo1624	1	0	0	0	0	0	0	0	0	0	0	1	0	0	0	1	2	0	0	2	0	0	0	0	0	7	0	0	3	0	0	0	0	0	0	0	0	1	1	0	0	0	0	2	0	0	0	0	0
denovo1625	0	0	1	0	0	1	0	0	0	0	0	0	0	0	0	0	0	0	0	0	0	0	0	0	0	0	0	0	0	0	0	0	0	0	0	0	0	0	0	3	0	0	0	0	0	0	0	0	0
denovo1626	0	0	0	1	0	0	0	0	0	0	0	0	0	0	0	0	2	0	0	0	0	0	0	0	0	0	0	0	0	0	0	0	0	0	0	0	0	0	1	0	0	0	0	0	0	0	0	0	0
denovo1627	0	0	0	0	0	0	0	2	1	0	1	3	0	0	0	0	0	0	0	0	0	2	0	0	0	0	0	0	0	3	0	0	0	0	1	0	0	0	0	0	1	0	0	0	0	0	0	0	1
denovo1628	0	0	0	0	0	0	0	0	0	0	0	1	0	0	0	0	0	0	0	0	0	0	0	0	1	0	0	0	0	0	0	0	0	0	0	0	0	0	0	0	0	0	0	0	0	0	0	0	0
denovo1629	0	0	0	0	2	1	0	0	0	0	2	0	1	3	0	2	0	0	4	0	0	0	1	0	1	2	0	0	0	0	2	1	0	1	2	1	0	0	1	0	0	4	2	2	0	1	0	0	2
denovo1630	0	0	0	5	0	0	0	0	0	0	0	0	0	0	0	0	0	0	0	0	12	0	0	0	0	4	0	0	0	0	0	0	0	0	0	0	0	0	0	0	0	0	0	0	0	0	0	0	0
denovo1632	0	0	0	0	0	0	0	0	0	0	0	0	0	0	0	5	0	0	0	0	0	0	0	0	0	0	0	0	0	0	0	0	0	0	0	0	0	0	0	0	0	0	0	0	0	0	0	0	0
denovo1635	2	0	0	0	1	0	0	1	0	0	0	5	0	0	0	1	0	0	0	0	0	0	0	0	1	0	2	0	3	0	0	0	0	0	0	0	0	0	0	1	0	0	0	1	1	0	0	0	1
denovo1636	0	0	0	2	0	0	0	0	0	0	0	0	0	0	0	0	0	0	0	0	0	0	0	0	0	0	0	0	0	0	0	0	0	0	0	0	0	0	0	0	0	0	0	0	0	0	0	0	0
denovo1637	0	0	0	2	0	0	0	1	1	0	0	0	0	0	0	0	0	0	0	0	0	0	0	0	0	0	0	0	0	0	0	0	0	0	0	0	0	0	0	0	0	0	0	0	0	0	0	0	1
denovo1638	0	0	0	0	0	0	0	0	0	0	0	0	0	0	0	0	0	0	0	0	0	0	0	0	0	0	0	0	0	0	0	0	0	0	0	0	0	0	0	0	0	0	0	0	0	0	0	0	0
denovo1639	0	0	0	0	0	0	0	0	0	0	0	0	0	0	0	0	0	0	0	0	0	0	0	0	0	0	0	0	0	0	0	0	0	0	0	0	0	0	0	0	0	0	0	0	0	0	0	0	0
denovo1642	0	0	0	0	0	1	0	0	4	3	0	0	1	0	0	0	0	0	3	0	0	0	0	0	0	1	1	0	0	1	0	0	0	0	0	0	0	1	0	0	1	1	1	0	0	0	0	0	1
denovo1647	0	0	0	0	0	0	0	0	0	0	1	0	3	1	0	0	0	0	0	0	0	0	0	1	0	0	0	0	0	0	0	0	0	0	1	0	0	0	5	0	0	0	0	1	0	2	0	0	0
denovo1649	0	0	0	0	0	1	0	0	0	0	0	0	0	0	0	0	0	0	0	0	0	0	0	0	0	0	0	1	0	0	0	0	0	0	0	0	0	0	0	0	0	0	0	0	0	0	0	0	0
denovo1650	0	0	0	0	0	0	0	0	0	0	0	0	0	0	0	0	0	0	0	0	0	0	0	0	0	0	0	0	0	0	0	0	0	0	0	0	0	0	0	0	0	0	0	0	0	0	0	0	0
denovo1652	0	0	0	0	0	0	0	0	0	0	0	0	2	0	0	0	0	0	0	0	0	0	0	0	0	0	0	0	0	0	0	0	0	0	0	0	0	0	0	0	0	0	0	0	0	0	0	0	0
denovo1653	0	0	0	0	0	0	0	0	0	0	0	0	0	0	0	0	0	0	0	0	0	0	0	0	0	0	0	0	0	0	0	0	0	0	0	0	0	0	0	0	0	0	0	0	0	0	0	0	0
denovo1655	0	0	1	0	0	0	0	0	0	0	0	0	0	0	0	0	0	0	0	0	0	0	0	0	0	0	0	0	0	0	0	0	0	0	0	0	0	0	0	0	0	0	0	0	0	0	0	0	0
denovo1656	0	0	0	0	0	0	0	0	0	0	0	0	0	0	0	0	0	0	0	0	0	0	0	0	0	0	0	0	0	0	0	0	0	0	0	0	0	0	0	0	0	1	0	0	0	0	0	0	0
denovo1657	0	0	0	0	0	0	0	0	0	0	0	0	0	0	0	0	0	0	0	0	0	0	0	0	0	0	0	0	0	0	0	0	0	0	0	0	0	0	0	0	0	0	0	0	0	0	0	0	0
denovo1658	0	0	1	0	0	0	0	1	0	0	0	0	1	0	0	3	0	0	1	0	0	0	0	0	4	0	0	1	5	0	0	0	1	0	0	0	0	0	0	0	0	0	1	0	3	2	2	0	0
denovo1659	0	0	0	0	0	2	1	0	1	0	0	0	0	0	0	0	0	0	0	0	0	0	1	0	0	0	0	0	0	0	0	0	0	0	0	0	1	0	0	0	0	0	0	0	0	0	0	0	0
denovo1660	0	0	0	0	0	0	0	0	0	0	0	0	1	0	0	0	0	2	0	0	0	0	0	0	0	0	0	1	0	0	0	1	0	0	0	0	0	0	2	0	0	0	0	0	0	0	0	0	0
denovo1661	0	0	0	0	0	0	0	0	0	0	0	0	0	0	0	0	0	0	0	0	0	0	0	0	0	2	0	0	0	1	0	1	1	0	0	0	0	0	0	1	0	0	0	1	0	0	0	0	0
denovo1662	0	2	2	0	3	0	0	1	1	1	0	0	1	2	1	3	0	1	0	0	0	2	0	0	2	1	0	0	0	3	4	0	0	1	0	0	2	0	0	0	0	1	2	0	3	1	0	0	2
denovo1663	0	0	0	0	0	0	0	0	0	0	0	0	0	0	0	4	0	0	0	0	0	0	0	0	0	0	0	0	4	0	0	1	0	0	0	0	0	0	2	0	0	0	0	0	0	0	0	0	0
denovo1664	0	0	0	0	0	0	0	0	0	0	0	0	0	0	0	0	0	0	0	0	0	0	0	0	0	2	0	0	0	0	0	0	0	0	0	0	0	0	0	0	0	0	0	0	0	0	0	0	0
denovo1665	2	2	1	0	1	2	0	0	3	0	0	0	1	1	3	0	0	0	0	0	0	2	0	0	0	1	0	1	3	0	2	0	0	0	2	0	0	0	6	0	0	2	1	0	0	0	3	0	0
denovo1666	0	0	0	0	0	0	0	0	0	0	0	0	0	0	0	0	0	0	0	0	1	0	0	2	0	0	2	0	0	0	0	0	0	0	0	0	0	0	0	0	0	0	0	0	0	0	0	0	0
denovo1667	0	0	0	0	0	0	0	0	0	0	0	0	2	0	0	0	0	0	0	0	0	0	0	0	0	0	0	0	0	0	0	0	0	0	0	0	0	0	0	0	0	0	0	0	0	0	0	0	0
denovo1668	0	0	0	0	0	0	1	0	0	0	0	0	0	0	1	0	1	0	0	0	0	0	0	0	0	0	0	0	0	0	0	0	0	0	2	1	0	2	0	0	0	0	0	0	0	0	0	1	0
denovo1669	0	0	0	0	0	0	0	0	2	2	0	1	1	0	0	0	0	0	1	0	0	0	0	0	0	8	0	0	0	0	0	0	0	1	0	0	0	0	1	1	0	1	0	0	0	0	0	0	0
denovo1670	0	0	0	0	0	0	0	0	0	0	0	0	0	0	0	0	0	0	0	0	0	0	0	0	0	0	0	0	0	0	0	0	0	0	0	0	0	0	0	1	0	0	0	0	0	0	0	0	0
denovo1671	0	1	0	0	0	0	0	0	2	0	0	1	0	0	1	0	0	0	0	0	0	0	0	0	0	0	0	0	0	1	0	0	0	0	0	0	0	0	0	0	0	0	0	0	2	0	0	0	0
denovo1675	0	0	0	0	0	0	0	0	0	0	0	0	0	0	1	0	0	0	0	0	0	0	0	0	0	0	0	0	0	0	0	0	0	0	0	0	0	0	0	0	0	0	2	0	0	0	0	0	0
denovo1677	0	0	0	0	0	0	0	2	0	0	0	0	0	0	0	0	0	0	0	0	0	0	0	0	0	0	0	0	0	0	0	0	0	0	0	0	0	0	0	0	0	0	0	0	1	0	0	0	1
denovo1678	1	2	1	1	9	1	1	4	4	0	0	5	0	1	3	0	1	2	0	0	0	0	2	2	3	0	1	2	0	5	7	0	2	3	3	1	13	2	1	1	0	0	1	2	2	3	2	3	0
denovo1679	0	0	0	0	2	1	0	0	0	0	0	1	1	0	2	0	0	0	0	0	0	0	0	0	2	0	0	0	0	0	0	0	0	0	0	1	1	0	0	0	1	0	1	0	0	1	1	0	0
denovo1680	3	0	1	0	2	0	0	5	1	1	0	0	0	0	0	0	0	0	0	0	0	0	0	0	0	2	0	0	0	1	1	0	1	0	3	1	0	0	0	2	0	0	0	0	4	0	4	2	0
denovo1681	1	0	0	0	0	0	0	1	1	0	0	0	0	1	0	0	0	0	0	0	0	1	0	0	0	0	0	0	0	2	1	0	1	0	0	0	0	1	0	0	0	0	0	0	0	0	1	1	0
denovo1682	3	3	3	0	5	0	0	0	7	0	2	2	0	0	0	0	0	0	0	0	0	1	0	0	0	1	0	0	0	1	6	0	0	0	0	0	3	4	0	1	0	1	0	0	0	0	0	0	2
denovo1683	0	0	1	0	0	0	1	2	0	12	0	2	0	1	0	2	1	3	0	0	0	5	5	2	1	0	7	3	0	1	0	0	1	3	0	5	0	0	6	1	11	3	5	1	0	2	0	0	0
denovo1684	0	0	0	0	0	0	0	0	0	0	0	0	0	0	0	0	0	0	0	0	2	0	0	0	0	0	0	0	0	0	0	0	0	0	0	0	0	0	0	0	0	0	0	0	0	0	0	0	0
denovo1685	0	0	0	0	0	0	0	0	0	0	0	0	0	0	0	0	0	0	0	0	0	0	0	0	0	0	0	0	0	0	0	0	0	0	0	0	0	0	0	0	0	0	0	0	0	0	0	0	0
denovo1686	0	0	1	2	0	0	0	1	0	0	0	0	1	4	0	9	0	2	6	1	0	4	0	1	4	0	0	0	0	0	0	0	0	5	0	0	0	0	4	0	0	6	0	0	0	1	0	0	0
denovo1688	0	0	1	0	1	3	1	0	0	0	0	0	2	1	0	0	0	5	0	0	0	2	0	1	0	1	0	0	2	2	0	0	0	0	1	1	0	0	0	0	0	0	1	1	0	1	1	1	1
denovo1689	0	0	0	0	0	0	0	0	0	0	0	0	0	0	0	0	0	0	0	0	0	0	0	0	0	0	0	0	0	0	0	0	0	0	0	0	0	0	0	0	0	0	0	0	0	0	0	0	2
denovo1692	0	1	1	0	0	0	0	1	0	0	0	0	0	0	0	0	0	0	0	0	0	0	0	0	2	0	0	0	0	2	1	0	0	0	0	0	1	0	0	0	0	1	0	0	0	0	0	0	1
denovo1693	0	0	0	0	2	0	0	0	0	0	0	2	0	0	0	0	0	0	0	0	0	0	0	0	0	0	0	0	0	2	1	0	1	0	0	0	0	0	0	0	0	0	0	0	0	0	0	0	0
denovo1694	1	2	0	0	3	0	1	0	3	1	0	1	0	0	3	1	0	0	0	0	0	0	0	1	0	1	3	0	0	2	0	0	0	2	0	1	1	0	1	2	1	0	0	0	1	2	2	0	0
denovo1696	0	1	0	2	1	0	0	0	0	1	2	0	0	0	3	0	0	0	1	0	0	0	0	0	0	1	0	0	0	0	0	0	0	0	0	0	0	0	0	1	0	0	0	0	0	0	0	0	0
denovo1697	1	1	0	0	3	0	0	1	0	0	0	19	15	2	0	1	0	1	2	0	0	2	0	0	1	0	2	1	4	2	0	0	1	0	0	3	0	3	1	0	0	0	0	2	0	0	0	0	0
denovo1698	0	1	1	0	0	0	2	3	0	1	0	1	0	0	0	1	0	0	0	0	0	0	0	1	0	0	0	0	0	0	0	0	0	1	0	0	0	0	1	0	0	0	0	1	0	3	0	0	0
denovo1700	0	0	0	0	0	0	0	0	0	0	0	0	0	0	0	0	0	0	0	0	0	0	0	0	0	1	0	0	0	0	0	0	1	0	0	0	0	0	0	0	0	0	0	0	0	0	0	0	0
denovo1702	0	0	0	0	0	0	0	0	0	0	0	0	0	0	0	0	0	0	0	0	0	0	0	0	1	0	0	0	0	0	0	0	0	0	0	0	0	0	1	0	0	0	0	0	0	0	0	0	0
denovo1703	0	1	8	4	9	2	0	0	6	1	0	0	1	9	1	8	0	0	22	2	2	11	2	0	10	1	0	0	31	1	1	0	0	0	1	1	2	1	34	6	0	0	2	12	0	0	1	3	1
denovo1704	0	0	0	0	1	0	0	0	0	1	0	0	0	0	0	0	0	0	0	0	0	0	0	0	0	0	0	0	0	0	1	0	0	0	0	0	0	0	0	0	0	0	0	0	0	0	0	0	0
denovo1706	0	0	0	0	1	0	0	0	0	0	0	0	0	0	0	0	0	0	0	0	0	0	0	0	0	0	0	0	0	0	0	0	0	0	0	0	0	0	0	0	0	0	0	0	0	0	0	0	0
denovo1707	0	0	1	0	0	0	0	0	0	0	0	0	0	0	0	0	0	0	0	0	0	0	0	0	0	0	0	0	0	0	0	0	0	0	0	1	0	0	0	0	0	0	0	0	0	0	0	0	0
denovo1708	1	0	0	0	1	1	0	0	0	0	1	0	0	0	0	0	0	0	0	0	0	0	0	0	0	1	0	0	0	1	1	0	0	0	0	1	0	0	0	0	0	0	0	0	1	0	1	0	5
denovo1709	0	0	0	0	0	0	0	0	1	0	0	0	1	0	0	0	0	0	0	0	0	0	0	0	0	0	0	0	0	0	0	0	0	0	0	0	0	0	0	0	0	0	0	0	0	0	0	0	0
denovo1710	4	9	1	0	3	0	0	0	1	0	0	3	0	1	0	0	0	0	1	0	0	0	0	0	0	0	0	0	0	2	4	1	0	0	0	0	2	7	0	0	0	1	0	0	0	0	0	0	0
denovo1711	0	0	0	25	0	0	0	0	0	4	2	3	1	1	0	1	0	7	0	0	15	0	0	1	0	0	0	0	0	0	0	0	0	0	1	1	0	0	3	0	0	0	0	2	0	0	0	0	0
denovo1713	0	0	0	0	1	0	0	0	0	0	0	0	0	0	0	0	0	0	0	0	0	0	0	0	0	0	0	0	0	0	1	0	0	1	0	0	0	0	0	0	0	0	0	0	0	0	0	0	0
denovo1714	0	0	0	1	0	0	0	0	0	0	0	0	0	0	0	0	0	0	0	0	0	0	0	0	1	0	0	0	0	0	0	0	0	0	0	0	0	0	0	0	0	0	0	0	0	0	0	0	0
denovo1716	0	0	0	0	0	0	0	0	0	0	0	0	0	0	0	0	0	0	0	0	0	0	0	0	0	0	0	0	0	0	0	0	0	0	0	0	0	0	0	0	0	0	0	0	0	0	0	0	0
denovo1719	0	0	0	0	2	0	0	0	0	0	0	0	0	0	0	0	0	0	0	0	0	0	0	0	0	0	0	0	0	1	0	0	0	0	0	0	0	0	0	0	0	0	0	0	1	0	1	0	2
denovo1720	0	0	0	0	1	0	0	0	0	0	0	1	0	0	0	0	0	0	0	0	0	0	0	0	0	0	0	0	0	4	0	0	0	0	0	0	0	0	0	0	0	0	0	0	0	0	0	0	0
denovo1722	0	0	0	0	0	0	1	0	0	0	0	1	0	0	0	0	0	0	0	0	0	0	0	0	0	0	0	0	1	0	0	0	0	0	0	0	0	0	0	0	0	0	0	0	0	0	0	0	0
denovo1723	0	0	0	4	0	0	0	0	0	0	0	0	0	0	0	0	0	0	0	1	2	0	0	0	0	0	0	0	0	0	0	0	0	0	0	0	0	0	0	0	0	0	0	0	0	0	0	0	0
denovo1724	0	0	0	0	1	0	1	0	0	0	0	0	0	0	0	0	0	0	0	0	0	0	0	0	0	0	0	0	0	0	2	0	0	0	0	0	0	0	0	0	0	0	0	0	0	0	0	0	0
denovo1725	0	0	1	0	0	0	0	0	0	0	0	0	0	0	0	0	0	0	0	0	0	0	0	0	0	0	0	1	0	1	0	0	0	0	2	0	0	0	0	0	0	0	0	1	0	0	0	0	0
denovo1727	0	0	0	0	0	0	0	0	0	0	0	0	0	0	0	0	0	0	0	0	0	0	0	0	0	0	0	0	0	0	0	0	0	0	0	0	0	0	0	0	0	0	0	0	0	0	0	0	0
denovo1729	0	0	0	0	0	0	0	0	0	0	0	0	0	0	0	0	1	0	0	0	1	0	0	0	0	0	0	0	0	0	0	0	0	0	0	0	0	0	0	0	0	0	0	0	0	0	0	0	0
denovo1732	0	0	0	0	1	0	0	0	0	0	0	0	0	0	0	0	0	0	0	0	0	0	0	0	0	0	0	0	0	1	0	0	0	0	0	0	0	0	0	0	0	0	0	0	0	1	0	1	0
denovo1733	1	0	0	4	0	0	0	0	0	0	0	2	0	2	0	5	2	3	2	0	1	7	0	4	1	0	0	3	1	0	0	0	0	0	1	0	0	0	2	0	0	3	0	0	0	0	0	0	0
denovo1734	0	0	0	1	0	0	0	0	0	0	0	0	0	0	0	0	0	1	1	0	1	0	0	0	0	0	0	0	0	0	0	0	0	0	0	0	0	0	0	0	0	0	0	0	0	0	0	0	0
denovo1735	0	0	0	0	0	0	0	0	0	0	0	0	0	0	0	0	0	0	0	2	0	0	0	0	0	0	0	0	0	0	0	0	0	0	0	0	0	0	0	0	0	0	0	0	0	0	0	0	0
denovo1738	2	0	0	0	1	0	0	0	4	0	0	0	2	1	1	1	0	0	0	0	0	1	0	0	0	0	2	0	0	7	2	0	0	0	1	0	0	1	3	0	0	1	0	0	0	0	0	0	0
denovo1739	0	3	0	0	0	0	0	0	4	0	0	3	0	0	0	0	0	0	0	0	0	0	0	0	0	3	0	0	0	3	2	0	0	0	0	0	0	0	0	0	0	0	0	0	1	0	0	2	0
denovo1740	1	0	0	0	0	0	0	0	0	0	0	0	0	0	0	0	0	0	0	0	0	0	0	0	0	0	0	0	0	0	0	0	0	0	0	0	0	0	0	0	0	0	0	0	0	0	0	1	0
denovo1741	8	14	31	4	15	9	2	1	50	5	6	17	10	14	28	31	20	3	23	7	5	10	1	4	55	7	3	14	6	47	13	0	0	2	14	12	66	7	16	10	5	9	29	26	9	44	5	2	14
denovo1742	0	0	0	0	0	0	0	0	0	0	0	0	0	0	2	0	0	0	0	0	0	0	0	0	0	1	0	0	0	0	0	0	0	0	0	0	0	0	0	2	0	0	0	0	0	0	0	0	0
denovo1745	0	0	0	0	0	0	0	0	0	0	0	0	0	0	0	0	0	0	0	0	0	0	0	0	0	0	0	0	2	0	0	0	0	0	0	0	0	0	0	0	0	0	0	0	0	0	0	0	0
denovo1747	1	0	0	0	3	3	0	0	0	0	1	1	0	0	0	0	0	0	0	0	0	0	0	0	0	3	0	0	0	0	1	0	0	0	0	0	0	0	0	0	0	0	0	0	0	0	0	0	2
denovo1748	0	0	0	1207	1	0	0	0	0	0	1	0	0	0	0	0	0	2	4	1	639	2	0	0	0	0	0	0	0	0	0	0	0	0	0	0	0	0	0	0	0	1	0	3	0	0	1	0	0
denovo1752	1	0	0	0	0	0	0	0	0	0	0	1	0	0	0	0	0	0	0	0	0	0	0	0	0	0	0	0	0	0	0	0	0	0	0	0	0	0	0	0	0	0	0	0	0	0	0	0	0
denovo1753	0	0	0	1	0	0	0	0	0	0	0	0	0	0	0	0	0	1	0	0	2	0	0	1	0	0	0	0	0	0	0	0	0	0	0	0	0	0	0	0	0	0	0	0	0	0	0	0	0
denovo1754	0	0	0	0	10	1	2	2	0	1	0	3	0	0	0	0	0	0	0	0	0	1	0	2	0	1	2	0	0	6	6	0	0	3	0	1	0	0	0	3	0	0	0	0	0	3	2	1	7
denovo1755	0	0	0	8	0	0	0	0	0	0	0	0	0	0	0	0	0	0	2	0	3	0	0	1	0	0	0	4	0	0	0	0	0	0	0	0	0	0	0	0	0	0	0	0	0	0	0	0	0
denovo1756	1	0	0	0	0	0	0	0	0	0	0	0	1	0	0	0	0	0	0	0	0	0	1	0	0	0	0	0	0	1	0	1	0	0	0	0	0	0	1	1	0	0	0	0	0	0	1	0	0
denovo1758	2	0	0	0	0	0	0	0	1	0	0	0	0	1	0	0	0	0	0	0	0	0	0	0	0	0	0	0	0	0	0	0	0	0	0	0	0	0	0	0	0	0	0	0	0	0	0	0	0
denovo1759	0	6	0	0	0	0	0	0	0	0	0	0	0	0	0	0	0	0	0	0	0	0	0	0	0	0	0	0	0	0	0	0	0	0	0	0	0	0	0	0	0	0	0	0	0	0	0	0	3
denovo1760	0	0	0	0	0	0	0	0	0	0	0	0	0	0	0	0	0	4	4	0	3	0	0	0	3	0	0	13	1	0	0	0	0	0	0	0	0	0	0	0	0	0	0	0	0	0	0	0	0
denovo1761	0	0	0	0	0	0	0	0	2	0	0	0	0	0	1	0	0	0	0	0	0	0	0	0	0	0	0	0	0	0	0	0	0	0	0	0	0	0	0	0	0	2	0	0	0	0	0	0	0
denovo1762	0	0	0	3	0	0	0	0	0	0	0	0	0	0	0	1	1	0	2	0	2	1	0	0	0	0	0	2	0	0	0	0	0	0	0	0	0	0	0	0	0	0	0	0	0	0	0	0	0
denovo1763	0	0	0	0	0	0	0	0	0	0	0	0	0	0	0	0	0	0	0	0	2	0	0	0	0	0	0	0	0	0	0	0	0	0	0	0	0	0	0	0	0	0	0	0	0	0	0	0	0
denovo1764	0	0	0	0	0	0	0	0	0	1	0	0	1	1	0	4	0	0	0	0	0	0	0	1	0	0	0	1	2	0	0	0	0	0	0	0	0	0	0	0	0	0	0	2	0	0	0	0	0
denovo1765	0	0	1	0	1	0	0	0	0	0	0	0	0	0	0	0	0	0	0	0	0	0	0	0	0	0	0	0	0	0	0	0	0	1	0	0	0	0	0	0	0	0	0	0	0	0	0	0	0
denovo1767	1	0	1	0	0	0	0	1	1	2	0	0	0	0	0	5	0	0	0	0	0	0	0	0	0	2	0	0	0	0	0	0	0	0	0	0	0	0	0	0	0	1	0	1	0	0	0	0	1
denovo1768	0	0	0	0	2	0	0	0	0	0	0	0	0	0	0	0	0	0	0	0	0	0	1	1	0	0	0	0	0	0	0	0	0	0	1	0	0	0	7	0	0	1	0	1	0	0	5	0	0
denovo1769	0	0	0	0	1	0	0	0	0	0	0	0	0	0	0	0	0	0	0	0	0	0	0	0	0	0	0	0	0	0	0	0	0	0	0	0	0	0	0	0	0	0	0	0	0	0	0	0	0
denovo1770	0	0	0	0	0	0	0	0	0	0	0	0	0	0	0	0	0	0	0	0	0	0	0	0	0	0	0	0	0	0	0	0	0	0	0	0	0	0	0	0	0	0	0	0	0	0	0	0	0
denovo1772	0	0	0	4	0	0	0	0	0	0	0	0	0	0	0	0	0	0	0	0	6	0	0	0	0	0	0	0	0	0	0	0	0	0	0	0	0	0	0	0	0	0	0	0	0	0	0	0	0
denovo1774	0	0	0	0	0	0	0	0	1	0	1	0	1	0	0	0	1	0	0	0	0	0	0	0	0	1	0	0	0	0	0	0	0	0	0	0	0	0	0	0	0	0	0	0	0	0	0	0	0
denovo1775	0	0	1	0	2	0	0	0	1	0	0	0	5	0	2	1	3	0	2	0	0	0	0	0	0	4	0	0	4	1	0	0	0	0	1	0	0	0	1	0	0	0	1	5	2	0	0	0	0
denovo1776	16	1	48	1	6	1	1	3	4	3	1	4	1	5	0	8	4	8	11	0	12	8	1	4	2	3	1	1	1	5	0	2	1	0	4	0	3	1	6	5	0	1	1	5	0	1	0	0	1
denovo1777	0	0	0	0	0	0	0	0	0	0	0	0	0	0	0	0	0	0	0	0	0	0	0	0	0	0	0	0	0	0	0	0	0	0	0	0	0	0	0	0	0	0	0	0	0	0	0	0	0
denovo1778	0	0	0	0	0	0	0	0	0	0	0	0	0	0	0	0	0	0	0	0	0	0	0	0	0	0	0	0	0	0	0	0	0	0	0	0	0	0	0	0	0	0	0	2	0	0	0	0	0
denovo1779	0	0	0	0	0	0	0	0	0	0	0	0	0	0	0	0	0	2	0	0	0	0	0	0	0	0	0	0	0	0	0	0	0	0	0	0	0	0	0	0	0	0	0	0	0	0	0	0	0
denovo1780	0	0	0	0	0	0	0	0	0	2	0	0	0	0	0	2	0	1	5	0	0	0	0	0	0	0	0	1	1	0	0	0	0	0	0	0	0	0	0	0	0	0	0	0	0	0	0	0	0
denovo1781	0	0	0	0	1	1	0	0	0	0	0	0	0	0	0	0	0	0	0	0	0	0	0	0	0	0	0	0	0	0	0	0	0	0	0	0	0	0	0	0	0	0	0	0	0	0	0	0	0
denovo1782	0	0	0	0	0	0	0	0	0	0	0	0	0	0	0	0	0	0	2	0	0	0	0	0	0	0	0	0	0	0	0	0	0	0	0	0	0	0	0	0	0	0	0	0	0	0	0	0	0
denovo1784	0	0	0	2	0	0	0	0	0	0	0	0	0	0	0	0	0	0	0	0	1	0	0	0	0	0	0	0	0	0	0	0	0	0	1	0	0	0	0	0	0	0	0	0	0	0	0	0	0
denovo1787	0	0	0	0	0	0	0	0	0	0	1	0	0	0	1	0	0	0	0	0	0	0	0	0	0	0	0	0	0	0	0	0	3	0	0	0	0	0	0	0	0	0	0	0	0	0	0	0	0
denovo1789	0	0	0	0	0	0	0	0	0	4	0	0	0	1	0	1	0	0	1	0	0	0	0	2	0	0	0	1	0	0	0	0	0	0	1	1	0	0	3	2	2	0	0	0	0	1	0	0	0
denovo1790	0	0	0	0	3	2	0	0	3	0	0	1	0	0	0	0	0	0	0	0	0	0	0	0	0	2	0	0	0	0	2	0	0	0	2	0	2	0	0	0	0	0	0	0	0	0	0	0	0
denovo1793	0	0	0	0	0	0	0	0	0	0	0	0	3	0	0	0	0	0	0	0	0	0	0	0	1	0	0	0	0	0	0	0	0	0	0	0	0	0	0	0	0	0	0	0	0	0	0	0	0
denovo1794	0	0	0	0	6	1	2	1	0	0	0	17	0	0	6	0	0	1	0	0	1	0	0	0	0	3	0	0	0	9	0	0	1	0	1	0	0	1	0	1	0	0	0	0	0	0	0	0	0
denovo1795	0	0	0	4	0	0	0	0	0	0	0	0	0	0	0	0	0	0	0	0	6	0	0	0	0	0	0	0	0	0	0	0	0	0	0	0	0	0	0	0	0	0	0	0	0	0	0	0	0
denovo1796	0	0	0	0	0	0	0	0	0	0	0	0	0	0	0	0	0	0	0	0	0	0	0	0	0	0	1	0	0	0	0	0	0	0	0	0	0	0	0	0	0	0	0	0	0	0	0	0	0
denovo1797	0	1	0	0	1	0	0	1	2	0	1	1	0	0	1	0	2	0	0	0	0	0	0	0	0	0	4	0	0	4	0	0	1	0	3	0	0	0	2	0	0	0	0	0	0	2	0	1	0
denovo1798	0	0	0	2	0	0	0	0	0	0	0	0	0	0	0	0	0	0	0	0	0	0	0	0	0	0	0	0	0	0	0	0	0	0	0	0	0	0	0	0	0	0	0	0	0	0	0	0	0
denovo1799	0	0	0	0	0	0	0	0	0	0	0	0	0	0	0	0	0	0	2	0	0	0	0	0	0	0	0	0	0	0	0	0	0	0	0	0	0	0	0	0	0	0	0	0	0	0	0	0	0
denovo1801	0	0	0	3	0	0	0	0	0	0	0	0	0	0	0	0	0	0	0	0	1	0	0	0	0	0	0	0	0	0	0	0	0	0	0	0	0	0	0	0	0	0	0	0	0	0	0	0	0
denovo1803	0	0	0	0	1	0	0	0	0	0	0	0	0	0	0	0	0	0	0	0	0	0	0	0	0	1	0	0	0	1	0	0	0	0	0	0	0	0	0	0	0	0	0	0	1	0	0	0	0
denovo1804	11	3	9	0	24	4	8	6	6	6	1	0	0	1	7	0	2	2	2	0	0	0	0	2	0	2	2	0	0	1	6	0	2	0	1	0	11	0	0	14	0	2	1	1	1	0	2	2	8
denovo1805	0	0	0	0	0	0	0	0	0	1	0	0	0	9	0	42	0	17	32	0	0	2	0	10	0	0	0	29	0	0	0	0	0	0	0	0	0	0	0	0	2	0	0	4	0	0	0	0	0
denovo1806	0	0	0	0	0	0	0	0	0	1	0	0	0	0	0	1	0	1	0	0	0	0	0	1	0	0	0	3	0	0	0	1	0	0	0	0	0	0	1	0	0	0	0	4	0	0	0	0	0
denovo1807	0	0	0	0	0	0	0	0	0	0	0	0	0	0	0	0	0	0	0	0	0	0	0	0	0	0	0	0	0	1	0	0	0	0	0	0	0	0	0	0	0	0	0	0	0	0	0	0	0
denovo1808	26	11	47	1	247	106	39	42	50	19	16	51	31	24	29	27	16	15	84	18	2	3	13	9	22	216	37	17	12	57	44	3	13	53	41	38	51	34	23	105	36	22	70	82	26	212	32	31	102
denovo1809	0	0	0	0	1	0	1	0	0	0	0	0	0	0	0	0	1	0	0	0	0	0	1	0	0	0	0	0	0	0	0	0	0	0	0	0	0	0	0	0	0	0	0	0	0	0	0	0	0
denovo1810	0	0	0	0	0	0	0	0	0	0	0	0	0	0	0	0	0	0	0	0	0	0	0	0	0	0	0	0	1	0	0	0	0	0	0	0	0	0	5	0	2	0	0	0	0	0	0	0	0
denovo1811	1	0	0	0	0	0	0	0	1	0	0	0	0	0	1	0	0	0	0	0	0	0	0	0	0	0	0	0	0	0	0	1	8	0	2	0	2	0	0	0	0	0	0	2	1	0	0	0	0
denovo1812	0	0	0	0	0	0	0	0	0	1	0	0	0	0	0	0	1	0	0	0	0	0	0	0	0	0	0	0	0	0	0	1	0	0	0	2	0	0	0	0	0	0	0	0	0	0	0	0	0
denovo1813	0	0	0	0	5	0	0	1	0	0	0	0	0	0	0	0	0	0	0	0	0	0	0	0	0	0	0	0	0	1	0	0	0	0	0	0	0	0	0	1	0	0	1	0	0	0	1	0	0
denovo1816	0	0	0	0	0	0	0	0	0	0	0	0	0	0	0	0	0	0	0	0	0	0	0	0	0	0	0	0	0	0	0	0	0	0	0	0	0	0	0	0	0	0	0	0	0	0	0	0	0
denovo1817	0	0	0	0	0	0	0	0	0	0	0	0	0	0	0	0	0	0	0	0	0	0	0	0	0	0	0	0	0	0	0	0	0	0	0	0	0	0	0	0	0	0	0	0	0	1	0	0	0
denovo1818	14	7	10	0	5	1	3	20	3	11	1	3	1	5	0	5	0	6	0	0	0	0	5	4	1	4	2	19	0	1	2	0	7	5	1	4	1	0	2	4	3	5	5	4	7	1	1	4	4
denovo1821	0	1	0	0	1	0	0	0	1	0	0	0	0	0	0	0	0	0	0	0	0	0	0	0	0	0	0	0	0	0	1	0	0	0	0	0	0	0	0	0	0	0	0	0	1	0	0	0	0
denovo1823	0	0	0	0	0	0	0	0	0	0	0	0	0	0	0	0	0	0	0	0	0	0	0	0	0	0	0	0	0	0	0	0	0	0	0	0	0	0	0	0	0	0	0	0	0	0	0	0	0
denovo1824	4	0	0	0	1	2	0	0	0	0	0	2	0	1	1	0	0	0	0	0	1	1	0	0	1	1	1	0	0	0	0	0	0	0	0	0	0	0	0	0	0	0	0	0	0	1	0	0	0
denovo1825	0	0	0	0	2	0	0	2	0	0	0	0	0	0	0	0	1	0	2	0	0	0	0	0	1	2	0	1	4	0	0	0	0	2	0	1	1	0	0	0	0	0	0	4	0	1	0	0	0
denovo1826	0	0	0	0	1	0	0	1	0	0	0	0	0	0	1	1	0	1	0	0	0	0	1	0	0	0	1	0	0	2	0	0	1	1	0	1	0	0	0	0	0	0	0	0	0	1	1	1	0
denovo1828	0	0	0	0	0	0	0	0	0	0	0	0	0	0	0	0	0	0	0	0	3	0	0	0	0	0	0	0	0	0	0	0	0	0	0	0	0	0	0	0	0	0	0	0	0	0	0	0	0
denovo1829	0	0	0	0	1	0	1	0	0	0	0	0	0	0	0	0	0	1	2	0	0	0	0	1	0	0	2	0	0	1	0	1	0	0	0	0	2	0	0	0	0	0	0	0	0	0	0	0	0
denovo1830	0	0	1	0	0	0	0	0	0	0	0	0	0	1	0	0	0	0	0	0	0	0	0	0	0	0	0	0	0	0	0	0	0	0	0	0	0	0	0	0	1	0	0	1	0	0	0	0	0
denovo1831	0	0	0	16	0	0	0	0	0	0	0	0	0	0	0	0	0	0	0	0	5	0	0	0	0	0	0	0	0	0	0	0	0	0	0	0	0	0	0	0	0	0	0	0	0	0	0	0	0
denovo1832	0	0	0	2	0	0	0	0	0	0	0	0	0	0	0	0	0	0	0	0	0	0	0	0	0	0	0	0	0	0	0	0	0	0	0	0	0	0	0	0	0	0	0	0	0	0	0	0	0
denovo1833	0	0	0	0	1	0	3	0	0	0	0	0	0	0	0	0	0	0	0	0	0	0	0	2	0	0	0	0	0	0	0	0	0	0	0	0	0	0	0	0	0	0	0	0	0	0	0	0	0
denovo1834	3	11	1	0	22	0	20	14	5	2	0	2	1	1	1	0	0	0	0	0	1	0	1	1	0	2	1	3	0	19	11	0	1	4	3	2	2	0	1	7	3	2	4	0	2	18	1	2	4
denovo1835	0	0	0	0	0	0	0	0	0	0	0	0	0	0	0	1	0	0	0	0	0	0	1	0	0	0	0	0	0	0	0	0	0	0	0	0	0	0	0	0	0	0	0	0	0	0	0	0	0
denovo1837	0	0	1	0	0	0	3	2	5	5	0	0	0	2	0	4	2	2	9	3	0	2	0	0	2	4	2	15	4	0	0	0	0	2	0	1	0	3	1	1	2	0	0	1	0	6	0	0	0
denovo1838	0	0	0	0	0	2	0	0	0	0	0	0	0	0	0	0	0	2	1	0	0	0	0	0	0	1	0	0	0	0	0	0	0	0	0	0	0	0	0	0	0	0	0	0	0	0	0	0	0
denovo1840	0	0	0	0	0	0	0	0	0	0	0	0	0	0	0	0	0	0	0	0	0	0	0	0	0	0	0	2	0	0	0	0	0	0	0	0	0	0	0	0	0	0	0	0	0	0	0	0	0
denovo1841	0	0	0	0	0	0	0	0	0	0	0	0	0	0	0	0	0	0	0	0	0	0	2	0	0	0	0	0	0	0	0	0	0	1	0	0	0	0	2	0	0	0	0	2	0	0	0	0	0
denovo1842	0	0	0	0	1	0	0	0	0	0	0	0	0	0	0	0	0	0	0	0	0	0	0	0	0	0	0	0	0	1	0	0	0	0	0	0	0	0	0	1	0	0	0	0	0	0	0	0	0
denovo1843	0	0	0	0	0	0	0	0	0	0	0	0	0	0	0	0	0	1	0	0	0	0	1	0	0	0	0	0	0	0	0	0	0	0	0	0	0	0	0	0	0	0	0	0	0	0	0	0	0
denovo1844	0	0	0	0	0	0	0	0	0	0	0	0	0	0	0	0	0	0	0	0	0	0	0	1	1	0	0	0	0	0	0	0	0	0	0	0	0	0	1	0	1	0	0	0	0	0	0	0	0
denovo1845	0	0	0	0	0	1	0	0	0	0	1	0	0	0	0	0	0	0	0	0	0	0	0	0	0	1	0	0	3	1	0	0	0	0	0	0	0	0	0	0	0	0	0	0	0	0	0	0	0
denovo1846	1	0	0	0	2	3	2	2	0	0	0	2	0	0	0	0	0	0	0	0	0	1	0	0	0	5	0	0	0	1	1	0	0	1	0	1	0	0	0	1	0	0	1	0	0	6	1	2	1
denovo1847	0	0	10	0	5	0	7	4	6	1	1	1	1	0	0	0	0	1	2	0	1	0	1	1	0	2	0	2	0	3	3	0	1	2	1	2	3	1	0	1	1	2	0	0	0	0	2	0	0
denovo1848	0	0	0	0	0	0	0	0	0	0	0	0	0	0	1	0	0	0	0	0	0	0	0	0	0	0	0	0	0	0	0	0	0	0	0	0	0	0	0	0	0	0	0	0	1	0	0	0	0
denovo1849	4	0	1	0	0	0	0	0	0	0	1	7	0	0	1	1	3	0	1	0	0	0	1	0	1	0	0	0	0	0	0	2	0	0	1	0	0	0	0	0	0	0	0	1	0	0	0	0	0
denovo1850	0	0	0	0	0	0	0	0	0	0	0	0	0	0	0	0	0	0	0	0	0	0	0	0	0	0	0	0	0	0	0	0	0	0	0	0	0	0	0	0	0	0	0	0	0	0	0	0	0
denovo1851	0	0	0	0	0	0	0	0	0	0	0	0	0	0	0	0	0	0	0	3	0	0	0	0	0	0	0	0	0	0	0	0	0	0	0	0	0	0	0	0	0	0	0	0	0	0	0	0	0
denovo1854	0	0	0	0	0	0	0	0	0	0	0	0	0	0	0	0	0	0	0	0	0	0	0	1	0	0	0	0	0	0	0	0	0	0	0	0	0	0	0	0	1	0	0	0	0	0	0	0	0
denovo1855	5	42	30	0	110	2	22	51	20	5	9	33	8	7	15	7	0	4	1	0	0	1	2	0	6	12	0	0	0	73	52	1	25	51	21	2	9	7	9	39	1	8	60	5	52	26	5	20	25
denovo1856	0	0	0	2	0	0	0	0	0	1	0	0	0	0	0	1	0	2	1	0	0	0	0	0	1	0	0	0	5	0	0	0	0	0	0	0	0	0	0	0	0	0	0	0	0	0	0	0	0
denovo1857	0	0	0	0	0	0	0	0	0	0	0	0	0	0	0	0	0	0	0	0	0	0	0	0	0	0	0	0	0	2	0	0	0	0	0	0	0	0	0	0	0	0	0	0	0	0	0	0	0
denovo1859	6	1	2	3	3	1	3	2	3	2	1	7	5	6	1	5	1	2	0	1	0	1	1	0	3	5	1	6	3	5	1	1	2	0	5	4	3	1	11	0	0	1	2	0	5	1	5	4	1
denovo1861	0	0	0	0	0	0	0	0	0	0	0	1	1	1	0	0	0	0	2	0	0	0	0	0	0	0	0	0	0	1	0	0	0	0	0	0	1	0	0	0	0	0	0	0	0	0	1	0	0
denovo1862	6	0	0	0	2	0	0	1	0	0	0	1	0	0	1	0	0	0	0	0	0	0	0	1	4	0	0	0	0	1	0	0	0	0	0	0	0	0	0	4	0	1	3	0	4	0	7	1	9
denovo1863	0	0	0	0	0	0	0	0	0	0	0	1	0	0	0	0	0	0	0	0	0	0	0	0	0	0	0	0	0	0	0	0	0	0	0	0	0	0	0	0	0	0	0	0	0	0	0	0	0
denovo1864	1	0	1	0	0	0	0	0	11	1	0	6	1	0	0	0	0	1	0	0	0	0	0	1	1	6	0	1	0	0	0	0	4	0	0	0	0	1	0	0	0	0	0	0	0	1	0	1	0
denovo1865	0	0	2	3	0	0	1	0	0	3	0	0	0	76	0	50	9	11	102	27	4	30	14	7	73	0	13	0	27	1	0	15	0	0	35	0	0	0	27	0	9	3	0	19	0	0	0	3	0
denovo1866	0	0	0	0	0	0	0	0	0	0	0	0	0	0	0	0	0	0	0	0	0	0	0	0	0	0	0	0	0	0	0	2	0	0	0	0	0	0	0	0	0	0	0	0	0	0	0	0	0
denovo1867	0	0	0	0	0	0	0	0	0	0	0	0	0	0	0	0	0	6	0	0	0	0	0	31	0	0	0	0	0	0	0	0	0	0	0	0	0	0	0	0	0	0	0	0	0	0	0	0	0
denovo1868	2	0	0	0	1	2	1	1	0	2	1	0	0	0	3	0	0	1	0	1	0	0	0	1	0	0	1	0	0	0	0	0	2	0	3	0	0	0	1	0	0	0	0	0	0	0	0	1	0
denovo1869	0	0	0	0	0	0	0	0	0	0	0	0	0	0	0	0	0	1	0	1	0	0	0	0	0	0	0	0	0	0	0	0	0	0	0	0	0	0	0	0	0	0	0	0	0	0	0	0	0
denovo1873	2	3	21	0	0	3	0	0	3	0	0	0	0	2	2	0	0	0	0	0	0	0	0	0	0	0	0	0	0	0	0	0	0	0	0	0	0	0	0	0	0	0	2	0	0	0	0	0	1
denovo1874	0	0	0	0	0	0	1	2	0	0	0	0	0	0	0	0	0	0	0	0	0	0	0	0	0	0	0	0	0	0	0	0	0	7	0	1	0	0	0	0	0	2	0	0	0	0	0	0	0
denovo1875	0	0	0	0	0	0	0	1	0	0	1	0	0	0	0	0	0	0	0	0	0	0	0	0	0	0	0	0	0	1	0	0	2	0	0	0	0	0	1	0	0	0	0	0	2	0	1	1	0
denovo1876	0	0	0	0	0	0	0	0	0	0	0	0	0	0	0	0	0	0	3	0	0	1	0	0	0	0	0	2	0	0	0	0	0	0	0	0	0	0	0	0	1	0	0	0	0	0	0	0	0
denovo1877	0	0	0	0	0	0	0	0	0	0	0	0	0	0	0	0	0	0	0	0	0	0	0	0	0	0	0	0	0	0	0	0	0	0	0	0	0	0	0	0	0	0	0	0	0	0	0	0	0
denovo1878	0	0	0	1	0	0	0	0	0	0	0	0	1	2	0	4	1	1	5	0	0	0	0	0	2	0	0	1	1	0	0	0	0	0	0	0	0	0	1	0	0	0	0	6	0	0	0	0	0
denovo1879	0	0	0	0	0	0	0	0	0	0	0	0	0	0	0	0	0	0	0	0	0	0	1	0	0	0	0	0	6	0	0	1	1	0	0	0	0	0	0	0	0	0	0	0	0	1	0	0	0
denovo1880	1	0	0	0	0	0	0	0	0	0	0	0	0	0	2	0	0	0	0	0	0	0	0	0	0	4	0	0	0	0	1	0	1	0	1	0	0	0	0	0	0	2	0	0	0	0	0	0	0
denovo1881	5	0	2	0	7	1	5	8	10	5	0	20	76	0	1	1	3	1	0	1	0	0	0	1	0	9	0	7	5	6	0	1	0	3	3	0	0	1	3	1	1	2	0	1	0	8	0	0	0
denovo1883	0	0	0	4	0	0	0	0	0	0	0	0	2	0	0	0	0	0	0	0	0	1	0	2	0	0	0	0	1	0	0	0	0	0	0	0	0	0	0	0	0	0	0	0	0	0	0	0	0
denovo1884	0	0	0	0	3	0	1	0	0	0	0	1	0	0	0	0	0	0	0	0	0	0	0	0	0	0	0	0	0	1	1	0	0	0	0	0	0	0	0	0	0	0	0	0	0	0	0	0	0
denovo1885	0	0	0	2	0	0	0	0	0	0	0	0	0	0	0	0	0	0	0	0	0	0	0	0	0	0	0	0	0	0	0	0	0	0	0	0	0	0	0	0	0	0	0	0	0	0	0	0	0
denovo1886	0	0	0	0	0	0	0	0	0	0	0	0	0	0	0	0	0	0	0	0	0	0	0	0	0	0	0	0	0	0	0	0	0	0	0	0	0	0	0	0	0	0	0	0	0	0	0	0	0
denovo1887	0	0	0	0	1	0	0	0	0	0	0	0	0	0	0	0	0	0	0	0	0	0	0	0	0	0	1	0	0	1	0	0	0	0	0	0	0	0	0	0	0	0	1	0	0	0	0	0	0
denovo1888	0	0	0	0	0	0	0	0	0	0	0	0	0	0	0	0	0	7	0	0	0	0	0	2	0	0	0	0	0	0	0	0	0	0	0	0	0	0	0	0	0	0	0	2	0	0	0	0	0
denovo1889	0	0	0	0	0	0	0	0	0	0	0	0	8	0	0	0	0	0	0	0	0	0	0	0	0	0	0	0	0	0	0	0	0	0	0	0	0	0	0	0	0	0	0	1	0	0	0	0	0
denovo1890	0	0	0	0	0	0	0	0	0	0	0	0	0	1	0	0	0	0	0	1	0	3	1	3	0	0	0	1	9	0	0	0	0	0	0	0	0	0	0	0	0	0	0	1	0	0	0	0	0
denovo1891	0	0	0	0	1	0	0	3	0	0	0	3	0	0	2	0	0	0	0	0	0	0	0	0	0	0	0	0	0	3	1	0	2	0	1	0	0	0	0	3	0	0	0	0	4	0	2	0	0
denovo1892	0	0	0	0	0	0	0	0	0	0	0	0	0	0	0	0	0	0	0	0	0	0	0	0	0	0	0	0	0	0	0	0	0	0	0	0	0	0	0	0	0	0	0	0	0	0	0	0	0
denovo1893	0	0	0	0	0	0	0	0	0	0	0	0	0	0	0	0	0	1	0	0	8	0	0	0	0	0	0	2	0	0	0	0	0	0	0	0	0	0	0	0	0	0	0	0	0	0	0	0	0
denovo1894	0	0	0	0	0	0	0	0	0	0	0	0	0	0	0	0	0	0	0	0	0	0	0	0	0	0	0	0	0	0	0	0	0	0	0	0	0	0	0	0	0	1	0	0	0	0	0	0	0
denovo1895	1	0	0	0	5	0	0	0	0	0	2	30	0	0	19	0	0	0	0	0	0	0	0	0	0	4	0	0	0	3	0	0	0	0	3	0	0	1	0	5	0	0	2	0	0	0	0	0	1
denovo1897	0	0	1	0	0	0	1	0	0	0	0	0	1	0	0	0	0	1	0	0	0	0	0	0	0	0	0	0	0	0	0	0	0	0	1	0	0	0	0	0	0	0	0	0	2	0	0	0	0
denovo1898	0	0	1	3	0	0	0	0	0	0	0	0	0	0	0	0	0	1	0	0	0	0	0	1	0	0	0	0	0	0	0	0	0	1	1	0	0	0	0	0	0	0	0	0	0	0	0	0	1
denovo1899	0	0	1	0	0	0	0	0	0	1	3	0	10	6	1	1	61	11	7	2	0	4	18	2	26	1	0	3	2	0	0	0	0	0	3	6	0	3	22	0	0	1	0	19	0	0	0	0	0
denovo1900	2	0	3	0	4	0	0	0	0	0	1	1	0	0	2	0	0	0	0	0	0	0	0	0	0	0	0	0	0	3	2	0	0	1	0	0	2	0	0	1	0	1	0	0	0	0	0	1	1
denovo1902	0	0	0	2	0	0	0	0	0	1	0	0	0	5	0	2	5	2	2	3	0	2	0	4	0	0	1	2	3	0	0	3	0	0	0	0	0	0	3	0	3	0	0	4	0	0	0	0	0
denovo1903	0	0	0	0	0	0	0	0	0	0	0	0	0	0	0	0	0	0	0	0	0	2	0	0	0	0	0	0	0	0	0	0	0	0	0	0	0	0	0	0	0	0	0	0	0	0	0	0	0
denovo1904	0	0	0	0	0	0	0	0	0	0	0	0	0	0	0	0	0	0	0	0	0	0	0	0	0	0	0	0	0	0	0	0	0	0	0	0	0	0	0	0	0	1	0	0	0	0	0	0	0
denovo1907	0	0	2	0	0	0	0	0	0	0	0	0	0	2	0	2	0	4	0	0	0	1	0	2	0	0	0	0	0	0	0	0	1	0	0	0	0	0	2	0	4	0	0	0	0	0	0	0	0
denovo1908	0	0	0	0	2	0	0	0	0	0	0	0	0	0	0	0	0	0	0	0	0	0	0	0	0	0	0	0	0	0	2	0	0	0	0	0	2	0	0	0	0	0	0	0	0	0	1	0	0
denovo1909	0	0	0	0	0	0	0	0	0	0	0	0	0	0	0	0	0	0	0	0	0	0	0	0	0	0	0	0	1	0	0	0	0	0	0	0	0	0	0	0	0	0	0	0	0	0	0	0	0
denovo1910	0	0	0	0	0	0	0	0	0	0	6	1	0	0	2	0	0	0	0	0	0	0	0	0	0	0	0	0	0	0	0	0	0	0	0	0	0	0	0	0	0	0	0	0	0	0	0	0	0
denovo1911	1	0	0	19	0	1	0	0	0	0	0	1	0	0	0	0	1	0	4	0	25	0	0	1	1	0	0	1	0	0	0	0	0	0	0	0	0	0	1	0	1	1	0	0	0	0	0	0	0
denovo1912	0	0	0	0	0	0	1	0	3	0	0	0	0	0	0	0	0	0	0	0	0	0	0	0	1	0	0	0	0	0	0	0	0	0	0	0	0	0	0	0	0	0	0	0	0	0	0	0	0
denovo1913	0	0	0	0	0	0	0	0	0	0	0	0	0	0	0	0	0	0	0	0	0	0	0	0	0	0	0	0	0	0	0	0	0	0	0	0	0	0	0	0	0	0	0	0	0	2	0	0	0
denovo1914	0	0	0	1	4	0	0	0	0	0	0	0	2	0	3	0	0	0	3	1	2	2	0	1	2	0	0	0	1	0	1	1	0	0	1	0	1	0	0	0	0	0	1	4	0	0	0	1	1
denovo1915	4	0	0	0	0	1	1	1	1	0	1	3	1	3	0	0	0	0	0	0	0	0	1	0	0	8	0	0	0	4	0	0	0	2	3	0	3	6	0	0	0	2	0	1	1	3	5	0	0
denovo1919	0	0	0	0	0	0	0	0	0	0	0	0	0	0	0	0	0	0	0	0	0	0	0	0	0	1	0	0	0	0	0	0	0	0	0	0	0	0	0	0	0	0	0	0	0	0	0	0	0
denovo1920	1	0	0	0	2	0	0	3	0	0	0	1	1	0	0	0	1	1	5	1	0	0	0	0	1	1	0	6	0	2	0	0	0	0	1	0	0	1	2	3	1	1	0	6	2	0	2	1	3
denovo1921	7	0	0	0	0	0	0	0	0	2	2	8	0	0	5	1	1	0	0	0	0	0	0	0	0	0	0	1	0	1	0	0	1	0	1	0	0	1	2	0	1	0	1	0	0	0	0	0	0
denovo1922	0	0	0	0	0	0	0	0	0	6	0	0	3	0	0	0	1	23	18	0	19	7	1	6	3	0	0	6	7	0	0	3	0	0	5	5	0	0	7	0	23	6	0	18	0	0	0	0	0
denovo1923	0	0	2	2	2	5	1	9	1	0	8	18	12	2	3	6	2	5	1	1	3	0	0	18	10	8	0	5	0	6	0	2	1	0	14	0	0	2	0	1	0	12	0	0	5	0	4	6	2
denovo1925	0	0	0	0	0	0	0	0	0	0	0	0	0	0	0	0	0	0	0	0	0	0	0	0	0	0	0	0	0	0	1	0	0	0	0	0	0	0	0	0	0	0	0	0	0	0	1	0	0
denovo1927	3	0	3	9	5	0	2	4	0	1	4	5	5	36	0	16	7	10	13	3	19	16	2	2	5	0	0	10	7	6	0	3	0	3	3	1	0	0	4	2	2	2	0	1	1	3	0	2	0
denovo1928	0	0	0	0	0	0	0	0	0	0	0	1	0	0	0	0	0	0	0	0	0	0	0	0	0	0	1	0	0	2	0	0	1	1	3	0	0	0	0	0	0	1	0	0	0	0	0	0	0
denovo1930	0	0	0	0	0	0	0	0	0	0	0	0	0	0	0	0	0	0	0	0	2	0	0	0	0	0	0	0	0	0	0	0	0	0	0	0	0	0	0	0	0	0	0	0	0	0	0	0	0
denovo1932	0	1	0	0	2	1	0	0	0	0	0	1	5	0	0	0	1	0	0	0	0	0	0	0	0	0	0	0	0	1	0	0	0	1	0	0	0	0	0	0	0	1	0	2	0	1	0	0	0
denovo1933	0	0	0	0	0	0	0	0	0	0	0	0	0	0	0	0	0	0	0	0	0	0	0	0	0	0	0	0	0	0	0	0	0	0	0	0	0	0	0	0	0	0	0	0	0	0	0	0	0
denovo1934	0	0	0	0	0	0	1	1	0	1	0	1	0	2	0	1	0	2	0	0	0	0	0	0	0	0	0	0	0	1	0	0	2	0	0	0	2	0	1	0	0	0	2	0	2	0	1	0	0
denovo1935	0	0	0	0	1	0	0	0	0	0	0	1	0	0	0	0	1	0	0	0	0	0	0	0	0	0	0	0	0	0	0	0	0	0	0	0	0	0	0	0	0	0	0	0	0	0	0	0	0
denovo1936	0	0	0	0	0	0	0	0	0	0	0	0	0	0	0	0	0	0	0	0	0	0	0	0	0	0	1	0	0	1	0	0	0	0	4	0	0	0	0	0	0	0	0	0	0	0	0	3	0
denovo1937	0	0	0	0	0	0	0	0	0	0	0	1	0	0	0	0	0	0	0	0	0	0	0	0	0	0	0	0	0	0	0	0	0	0	0	0	0	0	0	0	1	1	0	0	0	0	0	0	0
denovo1938	6	4	15	0	88	26	13	23	9	31	7	23	13	55	19	17	5	11	46	5	1	24	8	18	55	46	7	13	12	47	26	9	8	18	16	6	12	2	9	40	16	15	54	49	24	55	8	8	21
denovo1939	0	0	0	0	0	0	0	0	0	0	0	0	0	0	0	0	0	0	0	0	0	0	0	0	0	0	0	0	0	0	0	0	0	0	0	0	0	0	0	0	0	0	0	0	0	0	0	0	0
denovo1940	0	1	3	0	0	0	0	1	0	0	0	1	1	0	1	0	0	0	2	0	0	0	0	1	0	0	0	0	0	5	0	0	1	0	0	0	0	0	0	0	0	2	1	0	0	1	2	1	0
denovo1941	0	0	0	0	0	0	0	0	0	0	0	0	0	1	0	0	0	1	0	0	0	0	0	0	0	0	0	0	0	0	0	0	0	0	0	0	0	0	0	0	0	0	0	0	0	0	0	0	0
denovo1942	0	0	0	0	0	0	0	0	0	0	0	0	0	0	0	0	0	1	0	0	0	0	0	0	0	0	0	0	0	0	0	0	0	0	0	0	0	0	0	1	0	0	0	0	0	0	0	0	0
denovo1943	0	0	0	0	0	0	0	0	0	0	0	0	1	1	0	1	0	0	0	1	0	0	0	0	0	0	0	0	0	0	0	0	0	0	0	0	0	0	2	0	0	0	0	0	0	0	1	0	0
denovo1944	2	0	0	0	9	2	1	0	11	3	5	2	4	2	7	1	0	0	0	0	0	0	0	0	0	17	0	0	0	4	0	0	0	1	0	1	0	0	2	3	2	2	1	0	0	3	0	0	0
denovo1948	0	2	0	0	19	0	0	11	0	1	0	2	0	3	0	1	0	0	0	0	0	0	0	0	0	0	0	2	0	13	0	0	0	1	6	4	1	4	0	5	0	3	1	0	7	7	3	3	0
denovo1949	0	0	0	0	0	0	0	0	0	0	0	0	0	0	0	0	0	1	0	0	0	0	0	0	0	0	0	0	0	0	0	0	0	0	0	0	0	0	0	0	0	0	0	0	0	0	0	0	0
denovo1950	0	0	0	0	0	0	0	1	1	0	0	1	0	0	1	0	0	0	0	0	0	0	2	0	0	0	0	0	0	0	1	0	0	0	0	0	0	0	0	0	0	0	0	0	1	0	0	0	0
denovo1951	0	0	0	0	0	0	0	0	0	0	0	1	0	0	0	0	0	0	0	0	0	0	0	0	0	0	0	0	0	1	0	0	0	0	0	0	0	0	0	0	0	0	0	0	0	0	0	0	0
denovo1953	1	0	0	0	0	0	0	0	0	0	0	0	0	0	1	0	0	0	0	0	0	0	0	0	0	0	0	0	0	0	0	0	0	0	0	0	0	0	0	0	0	0	0	0	0	0	0	0	0
denovo1954	0	0	0	0	0	0	0	0	0	0	0	0	0	0	0	0	0	0	1	0	0	0	0	0	0	0	0	0	0	0	0	2	0	0	0	0	0	0	0	0	0	0	0	0	0	0	0	0	0
denovo1956	1	0	0	0	1	0	1	0	1	0	0	1	0	0	0	3	2	0	0	1	0	0	0	0	0	0	0	0	0	0	0	0	0	0	1	0	0	0	1	0	0	0	0	0	0	0	1	0	0
denovo1957	0	0	0	0	0	0	0	0	1	0	0	0	0	1	0	0	0	0	0	0	0	0	0	0	0	2	0	0	6	0	0	0	0	0	0	0	0	0	0	1	0	0	0	0	0	0	0	0	1
denovo1958	0	0	0	0	1	0	0	2	2	0	0	0	0	0	0	0	0	0	0	0	0	0	0	0	0	1	0	0	0	1	0	0	0	0	2	0	0	0	0	0	0	1	0	0	0	0	1	0	0
denovo1959	0	1	0	0	0	0	0	1	0	0	0	1	1	0	0	0	0	0	0	0	0	1	0	0	0	1	1	0	0	2	0	0	0	0	0	0	1	0	0	0	0	0	0	0	0	0	0	0	0
denovo1960	2	0	1	0	0	0	0	1	0	0	0	0	2	0	1	3	0	1	0	0	0	0	0	0	0	0	0	0	0	0	0	0	0	0	1	0	0	0	2	0	0	0	0	0	0	0	0	0	0
denovo1962	0	0	0	0	0	0	0	0	0	0	0	0	0	0	0	0	0	0	0	0	0	0	0	0	0	0	0	0	0	0	0	0	0	0	0	0	0	0	0	0	0	0	0	3	0	0	0	0	0
denovo1964	0	0	0	0	0	0	0	0	0	0	0	0	0	0	0	0	0	0	0	0	0	0	0	0	0	0	0	0	0	0	0	0	0	0	0	0	0	0	0	0	0	0	0	0	2	0	0	0	0
denovo1965	0	0	0	0	0	0	0	1	0	0	0	0	0	0	0	0	1	0	0	0	0	0	0	0	0	0	0	1	0	0	0	0	0	0	0	0	0	0	0	0	0	0	0	1	0	0	0	0	0
denovo1966	0	0	0	0	6	0	0	0	0	0	0	0	0	0	0	0	0	1	0	0	0	0	0	0	0	0	0	0	0	0	0	1	0	0	0	0	0	0	0	1	0	0	1	0	0	2	0	0	0
denovo1968	33	9	26	0	106	98	15	28	45	31	15	50	48	20	24	52	15	7	84	16	0	22	14	6	35	127	30	20	12	40	19	9	7	36	27	22	15	19	21	74	21	20	55	46	8	143	9	8	46
denovo1971	0	0	0	3	0	0	0	0	0	0	0	0	0	0	0	0	0	0	0	0	0	0	0	0	0	0	0	0	0	0	0	0	0	0	0	0	0	0	0	0	0	0	0	0	0	0	0	0	0
denovo1972	0	0	0	0	0	0	0	0	0	0	0	0	2	1	0	0	0	11	0	0	1	1	2	5	1	0	0	0	1	1	0	0	0	0	0	0	0	0	2	0	0	0	0	0	0	0	0	0	0
denovo1973	0	0	0	0	0	0	0	0	0	0	0	1	1	0	0	0	0	1	0	0	0	0	0	2	0	0	0	1	0	0	0	0	0	0	0	0	0	0	0	0	0	0	0	0	0	0	0	0	0
denovo1974	7	3	2	0	13	0	3	11	0	5	0	3	5	5	5	7	1	2	2	0	1	0	0	1	2	0	10	1	0	5	3	2	2	5	12	2	5	0	2	4	0	6	0	0	6	5	7	10	2
denovo1975	0	0	0	0	0	0	0	0	0	0	0	0	0	0	0	0	0	0	0	0	0	0	0	0	0	0	0	0	0	0	0	0	0	0	0	0	0	0	0	0	0	0	0	0	0	0	1	0	0
denovo1978	0	0	0	0	0	0	0	0	0	0	0	0	0	0	0	0	0	0	0	0	0	0	0	0	0	0	0	0	0	0	0	0	0	0	0	0	0	0	0	0	0	0	0	0	0	0	0	0	0
denovo1979	0	0	0	0	0	0	0	0	0	0	0	0	0	0	0	0	0	0	0	0	0	0	0	0	0	0	0	0	0	0	0	0	0	0	0	0	0	0	0	0	0	0	0	0	0	0	0	0	0
denovo1980	0	0	0	0	0	0	0	0	0	0	0	0	0	0	0	0	0	0	0	0	0	0	0	0	0	0	0	0	0	0	2	0	0	0	0	0	0	0	0	0	0	0	0	0	0	0	0	0	0
denovo1982	0	0	0	2	0	0	0	0	0	0	0	0	0	0	0	0	0	0	0	0	0	0	0	0	0	0	0	0	0	0	0	0	0	0	0	0	0	0	0	0	0	0	0	0	0	0	0	0	0
denovo1983	0	0	0	0	0	0	0	1	0	0	0	0	0	0	0	0	0	0	0	0	0	0	0	0	0	0	0	0	0	1	0	0	0	0	0	0	0	0	0	0	0	0	0	0	0	0	1	0	2
denovo1985	0	0	0	0	0	0	0	0	0	2	0	0	0	0	0	0	1	0	3	0	0	0	0	0	0	0	0	1	0	0	0	0	1	0	0	0	0	0	0	0	0	0	0	1	0	0	0	3	0
denovo1987	0	0	0	0	1	0	0	0	0	0	0	0	0	0	0	0	0	0	0	0	0	0	0	0	0	0	0	0	0	0	0	0	0	0	0	0	0	0	0	0	0	0	0	0	0	0	0	0	0
denovo1988	18	1	4	0	4	14	0	0	18	1	3	3	0	0	4	0	0	1	1	0	0	0	0	0	0	7	0	0	0	0	1	0	0	0	0	0	8	1	0	1	1	0	0	0	0	0	0	0	4
denovo1991	7	1	2	0	9	5	3	26	6	2	3	4	4	0	0	1	0	0	0	0	0	2	0	2	1	31	0	1	1	1	10	0	0	4	4	2	1	0	2	6	0	6	8	2	4	4	5	4	2
denovo1992	5	2	4	0	10	1	2	3	2	2	0	1	1	2	0	3	0	0	0	0	0	1	0	0	1	0	0	3	0	0	2	0	0	2	1	4	0	0	2	1	0	2	2	0	0	3	0	1	4
denovo1993	0	0	0	0	0	0	0	0	0	11	0	0	6	8	0	29	58	5	26	15	1	38	1	31	65	0	1	165	70	0	0	57	0	0	2	0	0	0	116	0	27	2	0	22	0	0	0	0	0
denovo1994	0	0	0	0	0	0	0	0	0	0	0	0	0	0	0	0	0	0	0	0	0	0	0	0	0	0	0	0	0	0	0	0	0	0	0	0	0	0	0	0	0	0	0	4	0	0	0	0	0
denovo1995	0	0	0	0	0	0	0	0	0	0	0	0	0	0	0	0	0	0	0	0	0	0	0	0	0	0	0	0	0	0	0	1	0	0	0	0	0	0	1	0	0	0	0	0	0	0	0	0	0
denovo1997	0	0	0	0	0	0	0	0	0	0	0	0	0	0	0	0	0	0	6	0	0	2	0	0	0	0	0	0	0	0	0	0	0	0	0	0	0	0	0	0	0	0	0	0	0	0	0	0	0
denovo1998	0	0	0	0	0	0	0	0	0	0	0	0	0	0	0	0	0	0	0	0	0	0	0	0	2	0	0	0	0	0	0	0	0	0	0	0	0	0	2	0	0	0	0	0	0	0	0	0	0
denovo1999	0	0	0	0	1	0	0	1	0	0	0	1	0	0	0	0	0	0	0	0	0	0	0	0	0	0	0	0	0	0	0	0	0	0	0	0	0	0	0	0	0	1	0	0	0	0	0	0	0
denovo2000	0	0	0	0	0	0	0	0	0	0	0	0	0	0	0	2	0	0	0	0	0	0	1	0	0	0	0	0	0	0	0	0	0	0	0	0	0	0	0	0	0	0	0	0	0	0	0	0	0
denovo2001	0	0	0	0	0	0	0	0	0	0	0	0	0	0	0	3	0	0	0	0	0	0	0	0	0	0	0	0	0	0	0	0	0	0	0	0	0	0	0	0	0	0	0	2	0	0	0	0	0
denovo2002	0	0	0	0	0	0	7	1	0	0	0	0	0	0	0	0	0	1	0	0	0	0	0	0	0	0	0	0	0	0	0	0	0	10	1	0	0	0	0	0	0	2	0	0	0	0	0	1	0
denovo2004	0	0	0	1	0	0	0	0	0	0	0	0	0	0	0	0	0	0	0	0	1	1	0	0	0	0	0	0	0	0	0	0	0	0	0	0	0	0	0	0	0	0	0	0	0	0	0	0	0
denovo2005	5	0	5	0	2	0	1	0	0	0	6	9	1	0	3	0	0	0	0	0	0	0	0	0	0	0	0	0	0	0	5	0	4	0	0	0	0	9	0	0	0	0	0	0	1	1	0	0	0
denovo2006	0	0	0	3	0	0	0	0	0	0	0	0	0	0	0	0	0	0	0	0	3	0	0	0	0	0	0	0	0	0	0	0	0	0	0	0	0	0	0	0	0	0	0	0	0	0	0	0	0
denovo2007	0	0	1	0	2	0	0	0	0	0	0	3	1	4	0	1	2	1	1	0	0	2	0	0	0	4	0	1	0	1	3	1	0	0	0	3	0	0	2	1	0	1	0	0	0	0	0	0	1
denovo2008	0	0	1	0	0	0	0	0	0	0	0	0	0	1	0	0	1	4	1	0	0	0	0	1	1	0	1	3	2	0	0	0	0	0	2	0	0	0	1	0	0	0	0	0	0	0	1	2	0
denovo2009	0	0	0	0	0	0	0	0	0	0	0	0	0	0	0	0	0	0	0	0	0	0	0	0	0	0	0	0	0	0	0	0	0	0	0	0	0	0	0	0	0	0	0	0	0	0	0	0	0
denovo2010	3	4	0	0	0	0	0	0	0	0	0	2	0	0	0	0	0	0	0	0	0	0	0	0	0	0	0	0	0	0	0	0	0	0	0	0	0	0	0	0	0	0	0	0	0	0	0	0	0
denovo2012	5	1	10	9	0	19	0	0	1	2	42	19	0	3	41	6	8	9	0	2	7	2	0	2	3	19	0	9	0	9	0	5	2	0	1	0	3	6	4	1	0	1	0	0	0	0	0	0	0
denovo2013	0	0	0	0	0	0	0	0	0	0	0	0	1	1	0	1	0	0	3	0	0	2	0	0	0	0	0	0	0	0	0	0	0	0	0	0	0	0	0	0	0	0	0	0	0	0	0	0	0
denovo2014	0	0	0	0	0	0	0	0	0	0	0	0	0	0	0	0	0	0	0	0	0	0	0	0	0	0	0	0	0	0	0	0	0	0	0	0	0	0	0	0	0	0	0	0	0	0	0	0	0
denovo2015	0	0	0	0	0	0	0	1	0	0	0	0	0	0	1	0	0	0	0	0	0	0	0	0	0	2	0	0	0	0	0	0	1	0	0	0	0	0	0	0	0	0	0	0	0	0	0	0	0
denovo2016	4	4	2	28	2	3	0	1	2	2	2	18	4	6	15	2	12	25	64	1	5	2	2	4	13	0	1	11	12	5	0	1	0	0	0	0	0	0	25	0	0	2	0	7	0	1	0	0	0
denovo2017	1	0	0	0	2	0	0	0	0	0	0	1	0	0	1	0	0	0	0	0	0	0	0	0	0	0	0	0	0	0	0	0	1	1	0	0	1	0	0	0	0	0	0	0	0	0	0	0	0
denovo2018	0	0	0	12	0	0	0	0	0	0	0	0	0	0	0	0	2	4	0	0	13	0	0	0	0	0	0	0	0	0	0	0	0	0	0	0	0	0	0	0	0	0	0	0	0	0	0	0	0
denovo2019	0	0	0	0	0	0	1	0	0	0	0	0	0	0	0	0	0	0	0	0	0	0	0	0	0	0	0	0	0	0	0	0	0	0	2	0	0	0	0	0	0	0	0	0	0	0	0	0	0
denovo2020	0	0	0	0	0	0	0	0	0	0	0	1	0	0	0	0	0	0	0	0	0	0	0	0	0	0	0	0	0	1	0	0	2	0	0	0	0	0	0	0	0	0	0	0	0	0	0	0	0
denovo2022	2	0	0	0	2	6	0	0	0	0	2	0	2	0	2	0	0	0	3	0	0	0	2	0	2	7	0	0	0	0	0	0	0	0	2	1	1	0	2	1	0	1	0	0	1	0	0	0	0
denovo2024	0	0	0	0	0	0	0	0	0	0	0	0	0	0	0	0	0	0	1	0	0	0	0	0	0	0	0	0	0	0	0	0	0	0	0	0	0	0	0	0	0	0	0	0	0	0	0	0	0
denovo2025	0	0	0	0	0	0	0	0	0	0	0	0	0	0	0	0	0	0	0	0	0	0	0	0	0	0	2	0	0	0	0	0	0	0	0	0	0	0	0	0	0	0	0	0	0	0	0	0	0
denovo2026	0	0	0	0	0	0	0	0	0	0	0	0	0	0	0	0	0	0	0	0	0	0	0	0	0	0	0	0	0	0	0	0	0	0	0	0	0	0	0	0	0	0	0	0	0	0	0	0	0
denovo2027	0	0	0	2	0	0	0	0	0	0	0	0	0	0	0	0	0	1	0	0	1	0	0	0	0	0	0	0	0	0	0	0	0	0	0	0	0	0	0	0	0	0	0	0	0	0	0	0	0
denovo2028	0	0	1	0	1	0	2	1	0	3	0	1	0	0	0	1	0	2	9	2	0	0	0	1	1	7	2	2	1	1	0	0	0	1	0	1	0	0	7	0	0	2	0	6	0	1	0	0	1
denovo2029	0	0	0	0	0	0	1	0	0	0	0	0	0	2	0	0	0	2	2	4	0	2	1	2	1	0	0	1	0	1	0	0	0	0	2	0	0	0	1	0	1	1	0	0	1	0	0	1	0
denovo2030	0	0	0	0	0	0	0	0	0	0	0	0	0	0	0	0	0	0	0	0	0	0	0	0	0	0	0	0	0	0	0	0	0	0	0	0	0	0	0	0	1	0	0	0	0	0	0	0	0
denovo2031	0	0	0	0	0	0	0	0	0	1	0	0	0	0	0	0	0	2	0	0	0	0	0	0	1	4	0	0	0	1	0	0	0	2	0	0	0	0	0	4	0	1	0	1	0	1	0	1	1
denovo2033	0	1	1	0	1	2	1	4	5	0	0	1	0	3	0	4	0	0	0	0	0	0	0	0	0	3	2	0	0	2	3	0	1	0	2	2	4	0	0	1	0	1	0	1	1	1	0	0	0
denovo2034	1	1	0	0	1	1	0	0	0	0	0	0	0	0	0	0	0	0	0	0	0	0	0	0	0	0	0	0	0	0	0	0	0	0	1	0	0	0	0	0	0	0	0	0	0	1	0	0	0
denovo2035	10	8	9	1	21	2	2	17	8	5	3	6	3	8	16	8	4	7	2	1	0	4	1	3	11	4	3	5	5	20	4	1	5	6	7	4	6	2	8	4	2	8	10	2	8	7	5	10	9
denovo2036	0	0	0	0	0	0	0	0	0	0	0	0	0	0	0	0	0	0	0	0	0	0	0	0	0	0	0	0	0	0	0	1	0	0	0	0	0	0	1	0	0	0	0	0	0	0	0	0	0
denovo2037	0	0	0	0	0	0	0	0	0	0	0	0	0	0	0	0	0	0	0	0	0	0	0	0	0	0	0	0	0	0	0	0	0	0	0	0	0	0	0	0	0	0	0	0	0	0	0	0	0
denovo2038	5	1	1	0	5	2	2	0	2	0	0	2	0	0	2	0	0	1	1	0	3	0	0	0	0	12	0	1	0	1	0	0	0	1	2	0	5	1	0	3	0	0	1	0	0	4	0	0	1
denovo2039	0	0	0	0	0	0	0	0	1	23	0	0	82	0	0	0	15	302	0	0	0	0	7	57	0	0	4	33	0	0	0	44	1	0	1	0	0	0	1	0	63	0	0	25	0	0	0	0	0
denovo2040	3	0	0	0	0	0	1	0	0	0	0	0	0	0	0	1	0	0	0	0	0	0	0	0	0	0	0	0	0	0	0	0	0	0	0	0	0	0	1	0	0	0	0	0	0	1	0	0	0
denovo2041	1	0	0	0	0	0	1	0	0	0	0	1	0	0	0	0	0	0	0	0	0	0	0	0	0	0	0	0	0	0	0	0	0	0	0	0	0	0	0	0	0	0	0	0	0	0	0	0	0
denovo2042	0	0	0	0	0	0	0	0	0	0	0	0	0	0	0	0	0	2	0	0	3	0	0	0	0	0	0	0	0	0	0	0	0	0	0	0	0	0	0	0	0	0	0	0	0	0	0	0	0
denovo2043	0	0	0	0	0	0	0	0	2	0	0	0	0	0	0	0	0	0	0	0	0	0	0	0	0	0	0	0	0	0	0	0	0	0	0	0	0	0	0	0	0	0	0	0	0	0	0	0	0
denovo2044	0	0	0	0	1	0	0	0	0	1	1	0	1	0	0	0	0	0	0	0	0	2	0	0	0	1	0	0	0	0	0	0	0	0	0	0	0	0	0	0	0	0	0	0	2	0	0	1	1
denovo2045	0	0	0	0	0	0	0	0	0	1	0	0	0	0	0	5	0	0	2	0	0	1	0	0	1	0	0	1	0	0	0	0	0	0	0	0	0	0	2	0	0	0	0	0	0	0	0	0	0
denovo2046	0	0	0	0	0	0	0	0	0	0	0	0	0	0	0	0	0	1	0	0	0	0	0	0	0	0	0	0	0	0	0	0	0	0	0	0	0	0	0	0	0	0	0	0	0	0	0	0	0
denovo2047	2	0	0	1	2	0	1	1	0	3	0	1	0	0	0	0	1	2	2	1	1	0	0	1	1	1	0	0	1	1	0	0	0	0	7	0	0	1	0	0	0	1	0	0	2	1	3	0	1
denovo2048	0	0	0	0	0	0	0	0	0	0	0	0	0	0	0	0	0	0	0	0	0	1	0	0	2	0	0	0	3	0	0	0	0	0	0	0	0	0	0	0	0	0	0	3	0	0	0	0	0
denovo2049	0	0	0	0	0	0	0	0	0	1	0	0	0	0	0	0	1	0	0	0	0	0	0	0	0	0	2	0	0	0	0	0	0	0	1	0	0	0	1	0	0	0	0	0	1	0	0	0	0
denovo2050	0	0	0	2	0	0	0	0	0	0	0	0	0	0	0	1	0	0	2	0	0	1	0	2	2	0	0	0	1	0	0	4	0	0	0	0	0	0	0	0	0	0	0	0	0	0	0	0	0
denovo2051	0	0	0	0	0	0	0	0	0	0	0	0	0	0	0	0	0	0	0	0	0	0	0	0	0	0	0	0	0	0	0	0	0	0	0	0	0	0	0	0	0	0	0	0	0	0	0	0	0
denovo2052	0	0	0	0	0	0	0	0	0	0	0	0	1	0	0	0	0	0	1	0	0	0	0	0	0	0	0	0	0	1	0	0	4	0	0	0	0	0	0	0	0	0	0	0	0	0	0	0	0
denovo2053	0	0	0	0	0	2	0	0	0	0	0	0	0	0	0	0	0	0	0	0	0	0	0	0	0	0	0	0	0	0	0	0	0	0	1	0	0	0	0	0	0	1	0	0	0	1	0	0	0
denovo2054	0	0	0	0	0	0	0	2	0	0	0	0	0	0	0	0	0	0	0	0	0	0	0	0	0	0	0	0	0	0	0	0	0	3	1	0	0	0	0	0	0	0	1	0	0	0	1	1	0
denovo2057	0	0	0	0	0	0	0	0	0	0	0	0	0	0	0	0	0	0	0	0	0	0	0	0	0	0	0	0	0	0	0	0	0	0	0	0	0	0	0	0	0	0	0	0	0	0	0	0	0
denovo2059	0	0	0	0	0	0	1	1	0	0	0	0	0	0	0	0	0	0	0	0	0	0	0	0	0	0	1	0	1	0	0	0	0	0	2	2	0	0	0	0	0	0	0	0	0	0	0	0	0
denovo2060	0	0	0	0	41	38	0	24	1	10	1	6	2	8	2	3	10	21	5	0	0	47	2	22	1	165	11	37	6	12	4	15	1	1	81	0	1	0	7	21	2	83	9	2	1	0	6	3	31
denovo2061	0	0	0	0	0	0	0	0	0	2	0	0	0	0	0	1	5	1	0	0	0	0	0	1	0	0	0	4	0	0	0	0	0	0	0	0	0	0	0	0	0	0	0	3	0	0	0	0	0
denovo2062	0	0	0	0	0	0	0	0	0	0	0	0	0	0	0	2	0	10	0	0	7	0	0	6	0	0	0	0	0	0	0	1	0	0	2	0	0	0	1	0	0	2	0	0	0	0	0	0	0
denovo2064	0	0	0	0	0	0	0	0	0	0	0	0	0	0	0	0	0	0	0	0	0	0	0	0	0	0	0	0	0	0	0	0	0	0	0	0	0	0	0	0	0	0	0	0	0	0	0	0	0
denovo2065	0	0	0	0	1	0	0	0	0	0	0	0	0	0	0	0	0	0	0	0	0	0	0	0	0	0	0	0	0	0	0	0	0	0	0	0	0	0	0	0	0	0	0	0	0	0	0	0	0
denovo2066	0	0	0	0	0	0	0	0	0	0	0	0	0	0	0	0	0	0	0	0	0	0	0	1	0	0	0	0	0	0	0	0	0	0	0	0	0	0	1	0	0	0	0	0	0	0	0	0	0
denovo2067	0	0	0	0	0	0	0	0	0	0	0	0	0	0	0	0	0	0	0	0	0	2	0	0	0	0	0	0	0	0	0	0	0	0	0	0	0	0	0	0	0	0	0	0	0	0	0	0	0
denovo2068	0	0	0	0	0	0	0	0	0	0	0	0	0	0	0	0	0	0	0	0	0	0	0	3	0	0	0	0	0	0	0	0	0	0	0	0	0	0	0	0	0	0	0	0	0	0	0	0	0
denovo2071	0	0	0	2	0	0	0	0	0	0	0	0	0	0	0	0	0	0	0	0	1	0	0	0	0	0	0	0	0	0	0	0	0	0	0	0	0	0	0	0	0	0	0	0	0	0	0	0	0
denovo2072	0	0	1	0	0	0	1	0	0	0	0	0	0	0	1	0	0	0	0	0	0	0	0	0	0	0	0	0	0	0	0	0	0	0	1	0	0	0	0	0	0	0	0	0	0	0	0	0	0
denovo2073	0	0	0	0	0	0	0	0	0	0	0	0	0	1	0	1	0	0	0	0	0	0	0	0	0	0	0	0	0	0	0	0	0	0	0	0	0	1	5	0	0	0	0	0	0	0	0	0	0
denovo2074	0	0	0	0	0	0	0	0	0	0	0	0	0	0	0	0	0	0	0	0	0	0	0	0	0	0	0	0	0	0	0	0	2	0	0	0	0	0	0	0	0	0	0	0	0	0	0	0	0
denovo2075	0	0	0	0	0	0	0	0	0	0	0	0	0	0	0	0	0	0	0	0	0	0	0	0	0	0	0	0	0	0	0	0	0	0	0	0	0	0	0	0	0	0	0	0	0	0	0	0	0
denovo2076	0	0	0	0	1	0	0	0	0	0	0	0	0	0	0	0	0	0	0	0	0	0	0	0	0	0	0	0	0	0	0	0	0	0	0	0	0	0	0	0	0	0	0	0	0	0	0	0	0
denovo2078	0	0	0	0	0	0	0	0	0	0	0	0	0	0	0	0	0	0	0	0	1	0	0	0	0	0	0	0	0	0	0	0	3	0	0	0	0	0	0	0	0	0	0	0	0	0	0	0	0
denovo2079	0	0	0	0	0	0	0	0	0	0	0	0	0	0	2	0	0	0	0	0	0	0	0	0	0	0	0	0	0	0	0	0	0	0	0	0	0	0	0	0	0	0	0	0	0	0	0	0	0
denovo2080	2	0	1	0	0	2	2	0	7	2	0	1	0	0	1	0	0	0	0	0	1	0	0	0	0	4	0	1	0	1	0	0	0	1	1	0	0	0	0	0	0	1	0	0	0	0	0	0	2
denovo2082	0	0	0	35	0	0	0	0	0	0	0	0	0	0	0	1	0	2	0	0	93	1	0	0	2	0	3	1	0	0	0	0	0	0	0	0	0	0	0	0	0	0	0	0	0	0	0	0	0
denovo2083	0	0	1	0	0	0	0	0	0	2	0	0	0	0	0	5	0	3	4	0	0	0	0	0	1	0	1	0	0	0	0	0	0	0	1	0	0	0	0	0	1	0	0	0	0	0	0	0	0
denovo2084	0	0	0	0	0	0	0	0	0	0	0	2	0	0	0	0	0	0	1	0	0	0	0	0	0	0	0	0	0	0	0	0	0	0	0	0	0	0	0	0	0	0	0	0	0	0	0	0	0
denovo2085	0	0	0	0	0	0	0	0	0	0	0	0	0	0	0	0	0	0	0	0	0	0	0	0	0	0	0	0	0	0	0	0	0	0	0	0	0	0	0	0	0	0	0	0	0	0	0	0	0
denovo2086	4	0	0	0	0	0	0	0	0	0	0	0	0	0	0	1	0	0	0	0	0	0	1	0	0	0	0	0	0	0	0	0	0	0	0	0	0	0	0	0	0	0	0	0	0	0	0	0	0
denovo2090	0	0	0	0	1	0	0	0	0	0	0	0	0	1	0	0	2	2	5	0	2	0	0	1	0	0	0	1	0	0	0	1	0	0	0	0	0	0	0	0	0	0	0	0	0	0	0	0	0
denovo2091	1	2	0	0	4	1	3	4	0	1	2	1	4	3	0	3	0	0	2	0	0	0	0	0	0	0	1	2	0	2	1	0	0	1	1	1	0	0	0	2	2	2	0	0	2	1	0	3	0
denovo2092	0	0	0	0	0	0	0	0	0	0	0	0	0	0	0	0	0	0	0	0	0	0	0	0	0	1	0	0	0	0	0	0	0	0	0	0	0	0	0	0	0	0	0	0	0	0	0	0	0
denovo2093	0	0	0	0	0	0	0	0	0	0	0	0	0	0	0	0	0	0	0	0	0	0	0	0	0	0	0	0	0	0	0	0	0	0	0	0	0	0	0	0	0	0	0	0	0	0	0	0	0
denovo2094	0	0	0	0	0	0	0	0	0	0	0	0	0	0	0	0	0	1	0	0	1	0	0	0	0	0	0	0	0	0	0	0	0	0	0	0	0	0	0	0	0	0	0	0	0	0	0	0	0
denovo2095	0	0	0	0	0	0	0	0	0	0	0	0	0	0	0	0	0	0	0	0	0	0	0	0	0	0	0	0	4	0	0	0	0	0	0	0	0	0	0	0	0	0	0	0	0	0	0	0	0
denovo2096	0	0	0	4	0	0	0	0	0	3	0	0	0	1	1	2	0	4	8	0	0	1	0	4	3	0	0	2	0	0	0	0	0	0	0	0	0	0	1	0	0	0	0	1	0	0	0	0	0
denovo2097	6	0	1	0	2	10	3	4	10	183	0	6	146	259	0	227	141	153	924	122	3	102	86	172	84	14	76	195	51	5	0	91	5	0	0	0	0	3	265	3	284	1	0	281	0	1	2	0	6
denovo2098	0	0	2	0	0	0	0	3	2	0	9	0	1	0	5	0	0	0	0	0	0	0	0	0	0	0	0	0	0	0	0	0	0	0	0	0	1	0	0	0	0	0	0	0	0	0	0	0	0
denovo2099	0	0	0	0	0	0	1	1	0	0	0	0	0	0	0	0	0	1	0	0	0	0	0	0	0	0	0	0	0	0	0	0	0	0	2	0	0	0	0	0	0	0	0	0	1	0	0	0	0
denovo2100	0	0	0	0	7	0	0	1	0	0	0	0	0	0	0	0	0	0	0	0	0	0	0	0	0	1	0	0	0	0	1	0	0	0	0	0	0	0	0	0	0	0	1	0	0	0	0	0	0
denovo2101	0	0	0	0	0	0	0	0	0	0	0	0	0	0	0	1	0	0	0	0	0	1	0	0	0	0	0	0	0	0	0	0	0	0	0	0	0	0	0	0	0	0	0	0	0	0	0	0	0
denovo2102	2	0	0	7	0	0	0	0	0	0	1	0	0	0	0	0	0	0	0	0	0	0	0	0	0	0	0	0	0	0	0	0	1	0	0	0	0	0	1	0	0	0	0	0	0	0	0	0	0
denovo2103	1	0	0	0	1	0	0	0	1	2	0	1	7	3	0	0	6	2	1	1	0	6	1	2	1	0	1	2	0	0	1	3	0	0	1	0	1	0	2	0	0	0	0	3	0	0	0	0	0
denovo2104	0	0	0	0	0	0	0	1	0	0	0	0	0	0	0	0	0	0	0	0	0	0	0	0	0	0	0	0	0	1	0	0	0	0	0	0	0	0	0	0	0	0	0	0	0	0	0	1	0
denovo2107	0	0	0	0	0	0	0	0	0	0	0	0	0	0	0	0	0	0	0	0	0	2	0	0	0	0	0	0	0	0	0	4	0	0	0	0	0	0	0	0	0	0	0	0	0	0	0	0	0
denovo2108	0	0	0	0	0	0	0	0	0	2	0	0	0	0	0	0	0	0	0	0	0	0	0	0	0	0	0	0	0	0	0	0	0	0	0	2	0	0	0	0	0	0	0	0	0	0	0	0	0
denovo2109	0	0	0	0	2	0	0	0	0	0	0	0	0	0	0	0	0	0	0	0	0	0	0	0	0	0	0	0	0	0	0	0	0	0	0	0	0	0	0	0	0	0	0	0	0	0	0	0	0
denovo2111	0	0	0	0	0	0	0	0	0	0	0	0	0	0	0	0	0	0	0	0	0	0	0	0	0	0	0	0	0	0	0	0	0	0	0	0	0	0	0	0	0	0	0	0	0	0	0	0	0
denovo2112	0	0	2	0	0	0	0	0	0	4	0	0	0	0	0	0	1	2	4	0	0	0	1	2	1	0	0	1	0	0	0	1	0	1	0	2	1	0	1	0	1	0	0	7	0	0	0	0	1
denovo2113	0	0	0	0	0	0	0	0	0	0	0	0	0	0	0	0	0	0	0	0	0	0	0	0	0	0	0	0	0	0	0	0	0	0	0	0	0	0	0	0	0	0	0	0	0	0	0	0	0
denovo2114	4	0	7	1	18	0	6	25	0	16	0	4	1	14	0	5	4	9	24	3	1	7	1	12	19	3	11	9	23	12	1	4	6	14	37	4	0	2	2	4	2	12	20	10	13	62	6	21	9
denovo2115	0	0	0	0	0	0	0	0	0	3	0	0	1	1	0	2	0	0	4	0	0	0	0	0	1	0	0	1	0	0	0	0	0	0	0	0	0	0	0	0	0	0	0	6	0	0	0	0	0
denovo2116	0	0	0	0	0	0	0	0	1	0	0	0	2	1	1	0	0	0	0	0	0	0	0	0	0	0	0	0	0	0	0	0	4	0	0	0	0	0	0	0	0	0	0	0	0	0	0	0	0
denovo2117	0	0	0	1	0	1	1	0	3	0	0	0	2	1	1	0	1	6	3	0	1	9	2	2	0	8	1	0	0	0	0	0	11	2	1	0	3	0	2	0	0	0	0	5	0	0	1	0	0
denovo2118	0	0	0	0	0	0	0	0	0	0	0	0	0	0	0	0	0	0	0	10	0	0	0	0	0	0	0	0	0	0	0	0	0	0	0	0	0	0	0	0	0	0	0	0	0	0	0	0	0
denovo2121	0	0	1	0	0	0	0	0	0	3	0	0	0	4	0	5	1	0	0	1	0	1	1	0	0	0	2	5	0	0	0	0	0	0	0	0	0	0	9	0	0	0	0	3	0	0	0	0	0
denovo2122	3	8	7	1	8	1	6	16	10	5	2	7	2	2	9	14	1	4	9	3	1	5	2	6	5	1	0	7	0	5	3	0	0	4	4	2	2	2	6	3	11	3	9	3	2	9	0	6	5
denovo2123	0	0	0	0	0	0	0	0	0	0	0	0	0	0	0	0	0	0	2	0	0	0	0	0	0	0	0	0	0	0	0	0	0	0	0	0	0	0	0	0	0	0	0	0	0	0	0	0	0
denovo2124	0	0	0	0	0	0	0	0	0	0	0	0	0	0	0	0	0	0	2	0	0	0	0	0	0	0	0	0	0	0	0	0	0	0	0	0	0	0	0	0	0	0	0	0	0	0	0	0	0
denovo2126	0	0	0	0	0	0	0	0	2	0	0	0	2	0	0	0	0	0	0	0	0	0	0	0	0	0	0	0	0	0	0	0	0	0	0	0	0	0	1	0	0	0	0	0	0	0	0	0	0
denovo2127	0	0	0	0	0	0	0	0	0	0	0	0	0	0	0	0	0	0	2	0	0	0	0	0	0	0	0	0	0	0	0	0	0	0	0	0	0	0	0	0	0	0	0	0	0	0	0	0	0
denovo2128	0	0	0	1	0	0	0	1	0	0	0	0	0	0	0	0	0	2	0	0	0	0	0	0	0	0	0	0	0	0	0	0	2	0	0	0	1	0	0	0	0	0	0	0	1	0	0	1	0
denovo2129	0	0	1	0	0	0	0	0	0	0	0	1	1	0	1	0	0	0	0	0	0	0	1	0	0	0	0	0	0	0	0	0	1	0	0	0	0	0	0	0	0	0	0	2	0	0	0	0	0
denovo2132	4	1	1	0	7	0	3	1	6	0	0	2	1	0	5	0	0	1	0	0	0	0	2	0	0	0	4	0	0	3	2	0	0	0	1	2	6	1	0	1	0	0	0	0	1	3	8	2	0
denovo2133	0	0	0	0	0	0	0	0	0	2	0	0	0	7	0	16	2	11	11	1	0	3	7	5	0	0	0	7	0	0	0	0	0	0	0	0	0	0	4	0	0	0	0	7	0	0	0	0	0
denovo2134	0	0	0	0	0	0	1	0	0	0	0	2	0	0	0	1	0	0	0	0	0	1	0	2	0	0	0	0	0	5	0	0	0	0	0	0	0	0	1	0	0	0	0	1	0	0	0	1	0
denovo2135	0	0	0	0	0	0	0	0	0	0	0	0	0	0	0	0	0	0	0	0	0	0	0	0	0	0	0	0	0	0	0	0	0	0	0	0	0	0	0	0	0	0	0	0	0	0	0	0	0
denovo2136	1	0	0	0	2	0	0	0	0	0	0	1	0	0	0	0	0	0	0	0	1	0	0	0	0	0	0	0	0	0	0	0	0	0	0	0	0	1	0	0	0	0	0	0	0	0	0	0	0
denovo2137	2	0	0	0	2	0	0	0	1	0	0	0	0	0	0	0	0	0	0	0	0	0	0	0	0	5	0	0	0	3	1	0	1	0	0	0	2	0	0	0	0	0	0	0	2	0	0	0	1
denovo2138	0	0	0	0	0	0	0	0	0	0	0	0	0	0	0	0	0	0	0	0	0	0	0	0	0	0	0	0	13	0	0	0	0	0	0	0	0	0	0	0	0	0	0	0	0	0	0	0	0
denovo2141	0	0	0	0	2	0	0	0	0	0	0	1	0	0	0	5	0	0	0	0	0	0	0	0	0	0	0	0	0	0	0	0	0	2	0	0	0	0	1	1	0	0	2	0	0	0	0	0	0
denovo2142	0	0	0	0	0	0	0	0	0	0	0	0	0	0	0	0	0	0	0	0	3	0	0	0	0	0	0	0	0	0	0	0	0	0	0	0	0	0	0	0	0	0	0	0	0	0	0	1	0
denovo2143	1	1	0	0	1	3	1	2	1	0	0	0	0	0	2	2	0	0	1	1	1	0	0	1	0	0	1	0	0	1	0	0	0	1	2	1	0	0	0	1	0	0	0	0	2	0	1	1	0
denovo2144	0	0	0	0	0	0	0	0	0	0	0	0	0	0	0	0	1	0	0	0	0	0	0	0	0	0	0	0	1	0	0	0	0	0	0	0	0	0	0	0	0	0	0	0	0	0	0	0	0
denovo2145	0	0	0	0	0	0	0	0	0	0	0	0	0	1	0	0	0	0	0	0	0	0	0	0	0	0	0	0	0	0	0	0	0	0	0	0	0	0	0	0	0	0	0	0	0	0	0	0	0
denovo2146	0	0	0	0	0	0	0	0	0	0	0	0	0	4	0	2	1	2	2	1	4	7	0	0	0	0	0	0	0	0	0	1	0	0	0	0	0	0	1	0	0	0	0	0	0	0	0	1	0
denovo2147	0	0	0	0	4	0	0	1	0	0	0	0	0	0	0	0	2	0	1	0	0	0	1	0	0	2	3	3	1	0	1	1	0	0	2	1	0	0	1	0	0	1	5	0	2	2	0	2	2
denovo2148	2	0	0	0	2	0	1	2	2	3	0	1	0	0	1	0	0	0	0	0	0	0	0	1	0	0	1	4	0	3	0	0	0	0	0	0	0	1	0	2	0	1	1	0	1	1	0	0	0
denovo2149	0	0	0	0	0	0	0	0	0	0	0	0	0	0	0	0	0	0	0	0	0	0	0	0	0	0	0	0	0	0	0	0	0	0	0	0	0	0	0	0	0	0	0	0	0	0	0	0	0
denovo2151	0	0	0	0	0	0	0	0	0	2	0	0	1	1	0	1	0	0	0	0	0	0	0	0	0	0	1	0	4	0	0	0	0	0	0	0	0	0	0	0	0	0	0	0	0	0	0	0	0
denovo2152	4	2	1	0	5	1	2	3	7	1	0	0	0	0	1	0	0	0	0	0	0	0	0	0	0	4	0	0	0	0	3	0	2	4	3	1	13	0	0	1	0	1	1	0	1	1	2	2	3
denovo2153	137	13	35	12	38	27	0	9	45	45	4	53	30	13	16	52	13	13	48	9	15	8	8	5	26	17	9	25	6	34	2	5	1	2	10	10	9	8	31	18	16	10	9	16	3	4	9	3	10
denovo2154	0	0	0	0	0	0	0	3	2	0	0	0	0	0	0	0	0	3	0	0	0	0	0	1	0	0	0	1	0	0	0	0	0	0	1	0	0	0	0	0	0	1	1	0	0	0	0	0	0
denovo2155	0	0	0	0	0	0	0	0	0	0	0	0	0	0	0	0	0	0	0	0	0	2	0	0	0	0	0	0	0	0	0	0	0	0	0	0	0	0	3	0	0	0	0	0	0	0	0	0	0
denovo2156	0	0	0	2	0	0	0	0	0	0	0	0	0	0	0	0	0	0	0	0	0	0	0	0	0	0	0	0	0	0	0	0	0	0	0	0	0	0	0	0	0	0	0	0	0	0	0	0	0
denovo2157	0	0	0	0	0	0	0	0	0	0	0	0	0	0	0	0	0	0	0	0	0	0	0	0	0	0	0	0	0	0	1	0	0	0	0	0	0	0	0	0	0	0	0	0	0	0	0	0	0
denovo2160	0	0	0	0	0	0	0	0	0	0	0	0	0	0	0	0	1	3	3	3	0	2	0	0	1	0	0	1	8	0	0	1	0	0	0	0	0	0	0	0	0	0	0	8	0	0	0	0	0
denovo2162	6	15	16	1	45	8	14	42	9	17	5	19	14	13	5	8	3	4	23	11	4	4	2	1	13	43	5	7	9	47	26	0	4	16	18	21	15	6	1	20	8	23	30	6	14	31	9	24	18
denovo2164	1	0	0	0	0	0	0	0	1	0	0	1	0	0	0	0	0	0	0	0	0	0	0	0	0	0	0	0	0	0	0	0	0	0	0	0	0	0	0	0	0	0	0	0	0	0	0	0	0
denovo2165	0	0	0	0	0	0	0	0	0	0	0	0	0	0	0	0	0	0	0	0	0	1	0	0	0	0	0	0	0	0	0	0	0	0	0	0	0	0	0	0	0	0	0	0	0	0	0	0	0
denovo2166	0	0	0	0	1	0	1	1	0	0	0	0	0	1	1	0	1	1	1	0	0	0	0	1	0	0	1	0	1	0	0	0	0	1	0	2	0	0	1	0	0	0	0	0	2	0	2	1	0
denovo2167	0	0	0	0	0	0	0	0	0	0	0	0	0	0	0	1	0	0	3	0	0	0	0	0	0	0	0	0	0	0	0	0	0	0	0	0	0	0	0	0	0	0	0	2	0	0	0	0	0
denovo2168	0	0	0	0	0	0	0	0	0	0	0	0	0	0	0	0	0	0	0	0	0	0	0	0	0	2	0	0	0	0	0	0	0	0	0	0	0	0	0	0	0	0	0	0	0	0	0	0	0
denovo2170	0	0	0	0	0	0	0	0	0	0	0	0	0	0	0	0	0	0	0	0	0	0	0	0	0	0	0	0	0	0	0	0	0	0	0	0	0	0	0	0	0	0	0	0	0	0	0	0	0
denovo2171	5	2	9	0	4	2	3	41	0	3	2	2	0	8	9	6	1	4	2	4	0	4	1	0	3	0	0	8	1	5	1	0	1	6	14	3	0	0	2	3	1	5	2	5	5	3	7	6	1
denovo2172	0	0	0	14	0	0	0	0	0	0	0	0	0	0	0	0	0	0	3	0	0	0	0	0	1	0	0	0	2	1	0	0	0	0	0	0	0	0	1	0	0	0	0	0	0	0	0	0	0
denovo2173	0	0	0	0	0	0	0	0	0	0	0	0	0	0	0	0	0	0	0	0	0	0	0	0	0	0	1	0	0	0	0	0	0	0	0	0	0	0	1	0	0	0	0	0	0	0	0	0	0
denovo2174	0	0	0	0	0	0	0	0	0	0	0	0	0	0	0	0	0	0	0	0	0	0	0	0	0	0	0	0	0	0	0	0	0	0	0	0	0	0	0	0	0	0	0	0	0	0	0	0	0
denovo2176	0	0	0	1	0	0	0	0	0	0	0	0	0	0	0	0	0	0	0	0	0	0	0	0	0	0	0	0	0	0	0	0	0	0	0	0	0	0	0	0	0	0	0	0	0	0	0	0	0
denovo2179	0	0	0	0	0	0	0	0	0	0	0	0	0	0	0	0	0	0	0	0	0	0	0	1	2	0	0	0	0	0	0	0	0	0	0	0	0	0	0	0	0	0	0	0	0	0	0	0	0
denovo2180	0	0	0	0	0	0	0	0	0	0	0	0	0	0	0	0	0	0	0	0	0	0	0	0	0	0	0	0	0	0	0	0	0	0	0	0	0	0	0	1	0	0	0	0	0	0	0	0	0
denovo2181	0	0	0	0	0	0	0	0	0	0	0	4	0	0	0	0	0	0	0	0	0	0	0	0	0	0	1	0	0	0	0	0	0	0	0	0	0	2	0	0	0	0	0	0	0	0	0	0	0
denovo2182	0	0	0	0	0	0	0	0	0	0	0	0	0	0	0	0	0	0	1	0	5	3	0	0	0	0	1	0	0	0	0	0	3	0	0	0	0	0	0	0	0	0	0	6	0	0	0	0	0
denovo2185	0	0	0	0	1	0	0	0	0	0	0	0	2	0	0	0	0	0	0	0	0	0	0	0	0	0	0	0	0	0	0	0	0	0	1	0	0	0	0	0	0	0	0	0	0	0	0	0	0
denovo2186	0	0	0	0	0	0	0	0	1	0	0	0	0	0	0	0	0	0	0	0	0	0	0	0	0	0	0	0	0	0	0	0	0	0	0	0	0	0	0	0	0	0	0	0	0	0	0	0	0
denovo2187	0	0	0	0	0	0	0	0	0	0	0	0	0	0	0	0	0	0	0	0	0	0	0	0	0	0	0	0	0	0	0	0	0	0	1	0	0	0	0	0	0	0	0	0	0	0	1	0	0
denovo2188	2	1	0	8	5	0	0	2	3	2	1	2	1	0	2	0	2	0	0	0	1	0	0	0	1	0	0	2	4	6	4	0	1	0	0	2	0	0	4	0	0	1	1	0	1	10	0	0	3
denovo2190	2	0	0	0	5	0	2	2	2	1	1	3	0	3	5	0	0	1	2	0	0	3	1	3	0	0	0	0	0	4	0	0	0	2	3	2	0	0	0	1	1	0	0	0	4	0	0	2	0
denovo2191	1	0	1	0	3	0	2	2	2	2	0	1	0	1	0	0	0	2	0	0	0	2	3	0	0	0	0	0	0	0	4	0	0	0	3	2	2	0	0	1	0	1	0	0	1	1	1	0	0
denovo2192	0	0	0	0	0	0	0	0	0	0	0	0	0	0	0	1	1	0	0	0	0	0	0	0	0	0	0	3	0	0	0	0	0	0	0	0	0	0	0	0	0	0	0	0	0	0	0	0	0
denovo2193	2	0	0	0	0	0	0	0	0	0	0	0	0	0	1	0	0	0	0	0	0	0	0	0	0	0	0	1	0	0	1	0	0	0	0	0	0	0	0	0	0	0	0	0	0	0	0	0	0
denovo2194	0	0	0	0	0	0	0	0	0	0	0	0	0	0	0	2	0	0	0	0	0	0	0	0	0	0	0	0	0	0	0	0	0	0	0	0	0	0	0	0	0	0	0	0	0	0	0	0	0
denovo2195	0	0	0	2	0	0	0	0	0	0	0	0	0	0	0	0	0	0	0	0	0	0	0	0	0	0	0	0	0	0	0	0	0	0	0	0	0	0	0	0	0	0	0	0	0	0	0	0	0
denovo2197	0	0	0	0	0	0	0	0	0	0	0	0	0	0	0	0	0	0	0	0	0	0	0	0	0	0	0	0	0	0	0	0	15	0	0	0	0	0	0	0	0	0	0	0	0	0	0	0	0
denovo2198	0	0	0	0	0	0	0	0	0	0	0	0	0	0	0	0	2	1	0	0	1	0	0	2	0	0	0	0	0	0	0	0	0	0	0	0	0	0	1	0	0	0	0	0	0	0	0	0	0
denovo2199	0	0	0	0	0	0	0	0	0	0	0	0	0	0	0	0	0	0	0	0	0	0	0	0	2	0	0	0	0	0	0	0	0	0	0	0	0	0	0	0	0	0	0	0	0	0	0	0	0
denovo2200	0	0	0	0	0	0	0	0	0	0	0	0	0	1	0	0	0	0	0	0	0	0	0	0	0	0	0	0	0	0	0	0	0	0	0	0	0	0	0	0	0	0	0	0	0	0	0	0	0
denovo2202	0	0	0	6	0	0	0	0	0	0	0	0	0	0	0	0	0	0	0	0	9	0	0	0	0	0	0	0	0	0	0	0	0	0	0	0	0	0	0	0	0	0	0	0	0	0	0	0	0
denovo2203	0	0	1	0	12	0	0	0	2	0	0	3	0	0	0	0	0	0	0	0	0	0	0	0	0	0	0	0	0	4	1	0	0	0	0	0	0	0	0	1	0	0	0	0	2	1	0	0	0
denovo2204	0	0	0	1	0	0	0	0	0	0	0	0	0	0	0	0	0	0	0	0	0	0	0	0	0	0	0	0	0	0	0	0	0	0	0	0	0	0	0	0	1	0	0	0	0	0	0	0	0
denovo2205	0	0	0	6	0	0	0	0	0	1	0	0	0	2	0	0	0	0	0	0	1	0	0	0	0	0	0	0	2	0	0	0	0	0	0	0	0	0	0	0	0	0	0	1	0	0	0	0	0
denovo2206	0	0	0	4	0	0	0	0	3	0	0	0	0	15	0	0	0	0	0	0	1	217	0	0	0	0	0	0	7	0	0	0	0	0	0	0	0	0	0	0	0	0	0	0	0	0	0	0	0
denovo2207	1	2	1	0	14	0	5	1	3	0	2	0	1	2	8	1	5	3	1	0	0	1	2	2	0	0	2	0	0	7	2	1	4	3	1	1	14	1	2	4	3	0	0	0	1	4	0	4	0
denovo2208	0	0	1	0	0	1	1	0	0	0	0	0	0	1	0	0	0	0	0	0	0	0	0	0	0	0	0	0	0	0	0	0	0	0	2	0	0	0	0	0	0	0	0	1	0	0	0	0	0
denovo2209	0	0	0	0	1	0	0	0	0	0	0	0	0	0	0	0	0	0	0	0	0	0	0	0	0	0	0	0	0	0	0	0	0	0	0	0	0	0	0	0	0	0	0	0	0	1	0	0	0
denovo2212	0	0	0	0	1	0	0	0	0	0	0	1	1	0	1	0	0	0	0	0	1	0	0	0	0	0	1	0	0	0	0	0	1	0	1	0	3	0	0	1	0	0	0	0	0	0	0	1	0
denovo2213	0	0	0	2	0	0	0	0	0	0	0	0	0	0	0	0	0	0	0	0	0	0	0	0	0	0	0	0	0	0	0	0	0	0	0	0	0	0	0	0	0	0	0	0	0	0	0	0	0
denovo2214	0	0	0	0	0	0	0	0	0	0	0	0	0	0	0	0	0	0	0	0	0	0	0	0	0	0	0	0	0	0	0	0	0	0	0	0	0	0	0	0	0	0	0	0	0	0	0	0	0
denovo2215	0	0	0	0	0	0	0	0	0	0	0	0	0	0	0	8	8	0	7	9	7	6	2	0	25	0	0	0	7	0	0	2	0	0	0	0	0	0	4	0	0	0	0	4	0	0	0	0	0
denovo2216	0	0	0	0	0	0	0	0	0	0	0	0	0	2	0	0	0	0	0	0	0	0	0	0	0	0	0	0	0	0	0	0	0	0	0	0	0	0	0	0	0	0	0	0	0	0	0	0	0
denovo2217	0	0	0	0	0	0	0	0	0	0	0	0	1	0	0	0	0	0	6	1	0	3	0	0	3	0	0	0	9	0	0	1	0	0	0	0	0	0	0	0	0	0	0	0	0	0	0	0	0
denovo2218	2	0	3	0	4	1	0	1	0	2	0	0	0	2	0	4	0	1	6	1	0	0	0	1	0	0	2	1	0	0	0	0	0	4	2	0	1	1	0	2	0	0	0	0	1	0	0	0	4
denovo2219	0	0	0	0	0	0	0	0	0	0	0	0	0	0	0	2	0	0	0	0	0	0	0	0	0	0	0	0	0	0	0	1	0	0	0	0	0	0	0	0	0	0	0	0	0	0	0	0	0
denovo2220	0	4	2	0	0	0	0	10	16	0	0	0	1	0	1	0	0	0	0	0	0	0	0	0	0	0	0	0	0	1	2	0	0	2	2	0	0	0	0	0	0	0	0	0	3	1	0	13	0
denovo2222	0	0	0	0	0	0	0	0	0	0	0	0	0	0	0	0	0	1	0	0	3	0	0	0	0	0	0	0	0	0	0	0	0	0	0	0	0	0	0	0	0	0	0	0	0	0	0	0	0
denovo2223	0	0	0	0	0	0	0	1	0	0	0	0	0	0	0	0	0	0	0	0	0	0	0	0	0	0	0	0	0	0	0	0	0	0	0	0	0	0	0	0	0	0	0	0	0	0	0	0	0
denovo2225	0	0	0	0	2	0	0	0	0	0	0	0	0	0	0	0	0	0	0	0	0	0	0	0	0	0	0	0	0	0	0	0	0	0	0	0	0	0	0	0	0	0	0	0	0	0	0	0	0
denovo2226	0	0	0	0	0	0	0	0	0	0	0	0	0	2	0	0	0	1	0	0	0	0	0	0	0	0	0	0	1	0	0	0	0	0	1	0	0	0	1	0	0	0	0	0	0	0	0	0	0
denovo2227	0	0	0	5	0	0	0	0	0	0	0	0	0	0	0	0	0	0	0	0	11	0	0	0	0	0	0	0	0	0	0	1	0	0	0	0	0	0	0	0	0	0	0	0	0	0	0	0	0
denovo2228	0	0	0	2	0	0	0	0	0	0	0	0	0	0	0	0	0	0	0	0	0	0	0	0	0	0	0	0	0	0	0	0	0	0	0	0	0	0	0	0	0	0	0	0	0	0	0	0	0
denovo2229	10	2	7	0	2	5	10	0	2	0	1	9	5	4	7	5	0	5	3	0	0	3	2	4	0	0	0	1	1	1	1	0	0	1	2	1	12	1	3	0	1	1	0	11	1	2	0	2	2
denovo2230	0	0	0	0	0	0	0	0	0	0	0	0	0	0	0	0	0	0	0	0	0	0	0	0	0	1	0	0	1	0	0	0	0	0	0	0	0	0	0	0	0	0	0	0	0	0	0	0	0
denovo2231	19	4	8	3	4	2	3	7	21	7	3	12	10	9	6	8	4	7	5	2	3	9	4	4	3	0	3	7	4	18	2	3	10	3	11	8	5	2	9	3	4	6	0	0	2	4	2	4	2
denovo2232	5	1	0	0	1	0	0	1	0	0	1	1	0	0	0	0	0	0	0	0	0	0	0	0	1	0	0	0	0	3	3	0	0	0	0	0	1	0	0	0	0	0	0	0	2	0	0	0	0
denovo2233	0	0	0	0	7	0	0	0	0	2	0	0	0	5	0	0	0	6	4	0	2	2	0	0	3	0	2	1	0	4	0	0	0	1	3	1	0	0	2	9	0	0	0	3	1	0	0	1	1
denovo2234	6	0	0	0	2	0	0	0	1	0	0	50	1	0	0	0	1	0	0	1	1	0	0	0	3	15	0	0	0	4	0	0	0	0	0	1	0	4	4	1	0	0	0	0	0	0	0	0	0
denovo2235	0	0	0	1	1	0	0	0	0	0	0	0	0	0	0	0	0	0	0	1	0	0	0	0	0	0	0	1	3	0	0	0	0	0	0	0	0	0	0	0	0	0	0	0	0	1	0	0	0
denovo2236	0	0	0	18	0	0	0	0	0	0	0	0	0	1	0	0	0	0	0	0	27	0	0	0	0	0	0	0	0	0	0	0	0	0	0	0	0	0	2	0	0	0	0	0	0	0	0	0	0
denovo2238	0	0	0	6	0	0	0	0	0	0	0	0	0	0	0	4	0	0	1	0	4	0	0	0	0	0	0	1	0	0	0	1	0	0	0	0	0	0	0	0	0	0	0	6	0	0	0	0	0
denovo2239	0	0	0	0	0	0	0	0	0	0	0	0	0	0	0	0	0	0	0	0	0	0	0	0	0	0	0	0	0	0	0	0	0	0	0	0	0	0	0	0	0	0	0	0	0	0	0	0	0
denovo2240	0	0	0	0	0	0	0	0	0	0	0	0	0	0	0	0	0	0	0	0	0	0	0	0	0	0	0	0	0	0	0	0	0	0	0	0	1	0	0	0	0	0	1	0	1	0	0	0	1
denovo2242	0	0	0	0	0	0	0	0	0	0	1	0	0	0	0	0	0	0	0	0	0	0	0	0	0	0	0	0	0	0	0	0	0	0	0	0	0	0	0	0	0	0	0	0	0	0	0	0	0
denovo2247	0	0	0	0	0	0	0	0	0	0	0	0	0	0	0	0	0	0	0	0	0	0	0	0	0	0	0	0	0	0	0	0	0	0	0	0	0	0	0	0	0	0	0	0	0	0	0	0	0
denovo2248	13	9	3	18	16	2	1	9	6	13	2	7	4	12	10	1	0	1	2	1	0	14	5	1	1	0	5	8	5	28	4	3	2	4	7	8	1	0	14	3	5	10	3	2	8	5	1	10	1
denovo2251	1	0	2	0	0	0	0	0	0	0	0	0	0	1	1	3	0	0	1	1	0	0	0	0	0	2	0	1	1	1	1	0	0	0	0	0	0	0	0	0	0	1	3	4	0	0	0	0	0
denovo2252	0	0	3	0	0	0	0	0	0	0	0	0	0	0	0	0	0	0	0	0	0	0	0	0	0	0	0	0	0	0	0	0	0	0	0	0	0	0	0	0	0	0	0	0	0	0	0	0	0
denovo2253	0	0	0	0	0	0	0	0	0	0	0	0	0	0	0	0	0	0	1	0	0	0	0	0	0	0	0	0	0	0	0	0	0	0	0	0	0	0	0	0	0	0	0	0	0	0	0	0	0
denovo2254	0	0	0	0	0	0	0	0	0	0	0	0	0	0	0	0	0	0	1	0	1	0	0	0	0	0	0	0	0	0	0	0	0	0	0	1	0	0	0	0	0	0	0	0	0	0	0	0	0
denovo2255	0	0	0	0	0	0	0	0	0	1	0	0	0	0	0	0	0	4	0	0	0	0	0	3	0	0	0	0	0	0	0	0	0	0	0	0	0	0	0	0	0	0	0	2	0	0	0	0	0
denovo2256	0	0	0	0	0	0	0	0	0	0	0	0	0	0	0	0	0	0	0	0	0	0	0	0	0	0	0	0	0	0	0	0	0	0	0	0	0	0	0	0	0	0	0	0	0	0	0	0	0
denovo2257	0	0	0	0	2	0	0	1	0	0	0	0	0	0	0	0	0	0	0	0	0	0	0	0	0	0	0	0	0	2	1	0	0	0	0	0	2	1	0	0	0	0	0	0	0	0	0	1	0
denovo2259	2	0	0	0	0	0	0	0	2	111	0	5	99	113	0	89	123	138	7	58	0	75	50	120	22	2	24	144	59	0	0	94	1	0	0	0	0	0	58	0	41	0	0	175	0	0	0	0	0
denovo2260	0	0	0	0	0	0	0	0	0	0	0	0	0	0	0	0	0	0	0	0	0	0	0	0	0	0	0	0	0	0	0	0	0	0	0	2	0	0	0	0	0	0	0	0	0	0	0	0	0
denovo2262	0	0	0	0	0	0	0	0	1	1	0	0	0	2	0	0	0	0	6	0	0	2	0	0	0	0	0	2	0	0	0	1	0	0	1	4	0	0	7	0	0	4	0	0	0	2	0	0	0
denovo2263	1	4	5	11	9	0	2	1	4	1	2	10	2	1	0	0	0	2	2	3	0	0	0	0	0	7	2	0	0	3	1	0	0	3	1	2	3	0	1	1	0	4	5	4	1	4	0	0	0
denovo2264	0	0	0	0	0	2	0	0	2	0	0	0	0	0	0	0	0	0	0	0	0	0	0	0	0	0	0	0	0	0	0	0	0	0	0	0	0	0	0	0	0	0	0	0	0	0	0	0	0
denovo2265	0	0	0	1	0	0	0	0	0	0	0	0	0	0	0	0	0	0	0	0	4	0	0	0	0	0	0	0	0	0	0	0	0	0	0	0	0	0	0	0	0	0	0	0	0	0	0	0	0
denovo2266	0	0	0	0	0	0	2	1	0	0	0	0	0	0	0	0	0	0	1	0	0	0	0	1	0	0	0	0	0	0	0	0	0	2	0	0	0	0	0	0	0	3	0	0	0	0	0	1	0
denovo2267	0	0	0	0	1	0	1	0	0	0	0	0	0	0	1	0	0	0	0	0	0	0	0	0	0	0	0	0	1	1	0	0	1	0	1	0	0	0	0	3	0	1	0	0	0	0	0	1	0
denovo2268	0	0	0	4	0	0	0	0	0	1	0	0	12	0	0	1	6	6	11	2	0	1	0	4	0	0	2	1	2	0	0	7	0	0	0	0	0	0	2	0	0	0	0	4	0	0	0	0	0
denovo2269	0	0	0	0	0	0	0	0	0	0	0	0	0	0	0	0	0	0	0	0	0	0	0	0	0	0	1	0	0	0	0	0	0	0	0	0	1	0	0	0	0	0	0	0	0	0	0	1	0
denovo2272	1	0	0	0	3	0	0	0	0	0	0	0	4	3	1	3	9	6	2	0	2	1	2	8	0	0	0	4	0	1	1	2	1	0	1	1	0	0	16	0	2	0	0	0	0	0	0	1	0
denovo2273	0	0	0	0	0	0	0	0	0	0	0	0	0	0	0	0	0	0	0	0	0	0	0	0	0	0	0	0	0	0	0	0	0	0	0	0	2	0	0	0	0	0	0	0	0	0	0	0	0
denovo2274	0	0	0	0	0	0	0	0	0	0	0	0	0	0	0	0	0	2	0	0	3	0	0	0	0	0	0	0	0	0	0	0	0	0	0	0	0	0	0	0	0	0	0	0	0	0	0	0	0
denovo2275	0	0	0	0	1	0	0	1	1	1	0	0	0	1	0	0	0	0	1	0	0	1	0	0	0	0	4	0	0	0	1	0	0	0	1	0	0	0	0	0	0	1	0	0	0	0	1	0	0
denovo2277	0	0	0	0	0	0	0	0	0	0	0	0	0	0	0	0	0	0	0	0	0	0	0	0	0	0	0	0	0	0	0	0	0	0	0	0	0	0	0	0	0	0	0	0	0	0	0	0	0
denovo2279	0	0	0	0	0	0	0	0	0	0	0	0	0	0	0	0	2	0	0	0	0	0	0	0	0	0	0	0	0	0	0	0	0	0	0	0	0	0	0	0	0	0	0	0	0	0	0	0	0
denovo2280	0	0	0	0	0	0	0	0	0	0	0	0	0	0	0	0	0	0	0	0	1	0	0	0	0	0	0	0	0	0	0	0	0	0	0	0	0	0	0	0	0	0	0	0	0	0	0	0	0
denovo2286	0	0	0	0	2	0	0	0	1	0	0	0	0	0	1	0	0	0	0	0	0	0	0	0	0	2	0	0	0	1	0	0	0	0	1	4	0	0	1	1	0	1	1	0	2	0	0	2	7
denovo2287	6	0	0	1	2	2	0	0	8	0	0	0	3	0	4	0	0	0	0	0	0	0	0	0	0	6	1	0	0	1	3	2	0	2	0	0	3	0	0	1	0	0	1	0	0	0	0	2	1
denovo2288	5	0	2	4	8	9	0	0	3	1	1	2	0	0	1	1	2	0	0	0	0	0	1	0	2	5	1	1	0	4	4	0	0	0	0	0	1	0	0	2	1	0	0	3	0	8	0	1	0
denovo2289	0	0	0	0	0	0	0	0	0	0	0	0	0	0	0	0	0	0	0	0	0	0	0	0	0	0	0	0	0	0	0	0	0	0	0	0	0	0	0	0	0	0	0	0	0	0	0	0	0
denovo2290	0	0	0	0	0	0	0	0	0	0	0	0	0	0	0	0	0	0	0	0	0	0	0	0	0	0	0	0	0	0	0	0	5	0	0	0	0	0	0	0	0	0	0	0	0	0	0	0	0
denovo2291	0	0	0	0	0	0	0	0	0	0	0	0	0	0	0	0	0	0	0	0	0	0	0	0	0	0	0	0	0	0	0	0	0	0	0	0	0	0	0	0	0	0	0	0	0	0	0	0	0
denovo2292	3	2	0	8	1	0	3	4	1	2	0	0	0	0	0	4	0	4	0	0	1	2	1	1	1	4	0	2	1	1	1	0	0	0	0	2	1	0	2	0	0	0	0	0	0	3	0	0	0
denovo2294	0	0	0	0	0	0	0	0	0	0	0	0	0	0	0	0	0	0	0	0	0	0	0	0	1	0	0	1	0	0	0	0	6	0	0	0	0	0	0	0	0	0	0	0	0	0	0	0	0
denovo2295	0	0	0	0	2	0	0	0	0	0	0	1	0	0	0	0	1	0	0	0	0	1	0	0	0	0	0	2	0	0	0	0	0	0	0	1	0	0	0	0	0	1	0	0	1	0	0	0	0
denovo2296	0	0	0	0	0	0	0	0	0	0	0	0	0	0	0	0	0	0	0	0	0	0	0	0	0	0	0	0	0	0	0	0	0	0	0	0	0	0	0	0	0	0	0	2	0	0	0	0	0
denovo2298	0	0	1	0	8	3	0	2	0	0	0	1	0	1	0	1	0	0	3	0	0	1	0	3	1	0	0	0	0	3	0	0	0	1	0	1	1	0	0	2	0	0	1	1	0	0	0	2	0
denovo2299	0	0	0	0	0	0	0	0	0	0	0	0	0	0	0	0	0	1	7	0	0	0	0	2	0	0	0	1	0	0	0	0	0	0	0	0	0	0	0	0	0	0	0	0	0	0	0	0	0
denovo2300	0	0	0	0	0	0	0	0	0	2	0	0	0	0	0	0	0	0	0	0	0	0	0	0	0	0	0	1	0	0	0	0	0	0	0	0	0	0	0	0	0	0	0	0	0	0	0	0	0
denovo2301	0	0	0	0	0	0	0	1	0	2	0	0	0	1	0	1	0	0	0	0	0	0	0	0	0	0	0	2	0	0	0	0	0	1	8	2	0	0	0	0	2	1	0	0	0	0	0	1	0
denovo2302	1	0	2	0	0	0	0	0	0	0	0	0	1	1	1	1	0	7	4	0	0	0	1	2	0	0	1	0	6	0	0	0	0	0	0	0	1	0	1	0	0	0	0	3	0	0	1	0	0
denovo2303	2	1	4	64	8	0	1	2	1	4	1	3	16	4	3	5	4	6	14	7	0	7	1	3	4	15	0	5	7	6	0	0	0	2	3	1	0	0	8	4	9	4	1	21	0	9	0	0	6
denovo2304	0	0	19	0	13	0	2	1	0	1	0	0	0	0	1	8	1	0	8	2	0	1	0	3	1	0	0	0	1	2	0	1	0	0	9	0	0	0	0	3	0	2	1	0	1	0	2	2	1
denovo2305	2	0	0	0	2	2	0	0	0	0	0	0	0	0	0	0	0	0	0	0	0	0	0	0	0	0	0	0	0	1	0	1	0	0	0	0	0	0	0	0	0	0	0	0	0	0	0	0	0
denovo2306	0	0	1	0	0	0	0	0	0	0	0	0	0	0	0	0	0	0	1	0	0	0	0	0	0	0	0	0	0	0	0	0	0	0	0	1	1	0	0	0	0	0	0	0	0	0	0	0	0
denovo2308	0	0	0	7	0	0	0	0	0	0	0	0	0	0	0	0	0	0	0	0	139	2	0	2	0	0	0	1	0	0	0	0	0	0	0	0	0	0	1	0	0	0	0	0	0	0	0	0	0
denovo2309	0	0	0	0	0	0	0	0	0	1	0	0	0	0	0	0	0	0	0	0	0	0	0	0	1	0	0	0	0	0	0	0	0	0	0	0	0	0	0	0	0	0	0	0	0	0	0	0	0
denovo2310	0	0	0	0	0	0	0	0	1	0	0	5	0	0	0	3	0	0	0	0	0	0	0	0	2	0	0	0	0	1	0	0	0	0	0	0	0	0	0	0	0	0	0	0	0	0	0	0	0
denovo2311	3	1	5	1	10	8	2	7	4	4	6	3	7	7	0	9	2	3	21	5	0	3	0	0	6	32	3	6	6	4	4	0	0	6	0	1	0	0	2	6	2	3	17	17	0	7	2	0	7
denovo2312	0	0	0	0	0	0	0	0	0	0	0	0	0	0	0	0	0	0	1	0	0	0	0	0	0	1	0	0	0	0	0	0	0	0	0	0	0	0	1	0	0	0	0	0	0	0	0	0	0
denovo2313	0	0	0	0	0	0	0	0	0	0	1	0	0	0	0	0	0	0	0	0	0	0	0	0	0	0	0	0	0	0	0	0	0	0	0	0	0	0	0	0	0	0	0	0	0	0	0	0	0
denovo2314	1	0	1	0	0	0	0	0	3	0	0	0	0	0	0	0	0	0	0	0	0	0	0	0	0	0	0	0	0	0	0	0	0	0	0	0	1	0	0	0	0	0	0	0	0	0	0	0	1
denovo2317	42	3	0	0	1	5	0	1	13	0	1	15	0	1	20	1	0	0	0	0	0	0	0	0	0	3	0	0	0	4	1	1	0	0	1	1	0	3	2	0	0	0	2	0	1	0	0	0	0
denovo2318	0	0	0	0	0	0	0	0	0	0	0	0	0	1	0	0	0	0	0	0	0	0	0	0	0	0	0	0	0	0	0	0	0	0	0	0	0	0	0	0	0	0	0	0	0	0	0	0	0
denovo2319	0	0	0	0	2	0	0	0	1	1	0	0	0	0	1	0	0	0	1	0	0	0	0	0	0	0	0	1	0	0	0	0	0	0	0	0	0	0	1	0	0	0	0	0	0	0	0	0	0
denovo2320	4	0	5	0	10	3	2	1	13	0	0	2	0	0	0	0	0	0	0	0	0	0	0	1	0	11	0	0	1	3	1	0	1	0	4	1	1	0	0	2	0	3	0	0	4	11	0	2	1
denovo2322	0	0	0	0	0	0	0	1	1	0	0	0	0	0	0	0	0	0	0	0	0	0	0	0	0	3	0	0	0	0	0	0	0	0	0	0	2	0	0	0	0	0	0	0	0	0	0	0	0
denovo2323	0	0	0	0	0	0	0	0	0	0	0	0	0	0	0	0	0	0	0	0	0	0	0	0	0	0	0	0	0	0	0	0	0	0	0	0	0	0	0	0	0	0	0	0	0	0	0	0	0
denovo2324	0	0	0	11	0	0	0	0	0	0	0	0	0	0	0	0	0	1	0	0	24	0	0	0	0	0	0	0	1	0	0	0	0	0	0	0	0	0	0	0	0	0	0	0	0	0	0	0	0
denovo2325	0	0	1	1	6	0	0	1	0	0	0	1	1	4	0	1	4	1	21	2	0	2	0	0	0	0	0	0	3	7	0	3	0	0	2	1	0	0	1	1	0	0	0	2	4	0	0	7	0
denovo2326	0	0	0	1	0	0	0	0	0	0	0	0	0	0	0	0	0	0	0	0	0	0	0	0	0	0	0	0	0	0	0	0	0	0	0	0	0	0	0	0	0	0	0	0	0	0	0	0	0
denovo2327	1	0	2	0	0	0	0	1	3	1	1	1	2	0	2	2	0	1	0	0	1	0	0	0	0	1	0	1	1	0	0	1	0	0	1	0	0	1	0	0	0	0	0	1	0	0	0	0	0
denovo2328	0	0	3	0	0	0	0	0	0	0	0	0	0	0	0	0	0	0	0	0	0	0	0	0	0	0	0	0	0	0	0	0	0	0	0	0	0	0	0	0	0	0	0	1	0	1	0	0	0
denovo2330	0	0	0	0	0	0	0	0	0	0	0	0	0	0	1	0	0	0	0	0	0	0	0	0	0	1	0	0	0	0	0	0	0	0	0	0	0	0	0	0	0	0	0	0	0	1	0	0	0
denovo2331	0	0	0	0	0	0	0	0	0	0	0	0	0	2	0	0	0	0	5	0	0	3	0	0	2	0	0	0	0	0	0	0	0	0	2	0	0	0	3	0	0	0	0	3	0	0	0	0	0
denovo2332	0	0	0	0	0	0	0	0	0	0	0	0	0	0	0	0	1	0	0	0	0	0	0	0	3	0	0	0	0	0	0	0	0	0	0	0	0	0	0	0	0	0	0	0	0	0	0	0	0
denovo2333	0	0	0	0	0	0	0	0	0	0	0	0	0	0	0	0	0	0	0	0	0	0	0	0	0	0	0	0	0	0	0	0	0	0	0	0	0	0	2	0	0	0	0	0	0	0	0	0	0
denovo2334	0	0	0	0	0	0	0	0	0	0	0	0	0	0	0	0	0	0	0	0	0	0	0	0	0	0	0	0	0	0	0	0	0	0	0	0	0	0	0	0	0	0	0	0	0	0	0	1	0
denovo2335	0	0	0	1	0	0	0	0	0	0	1	0	1	0	1	0	0	0	0	0	0	0	0	0	0	0	0	0	0	0	0	0	0	0	0	0	0	0	0	0	0	0	0	0	0	0	0	0	0
denovo2336	0	0	0	0	0	0	0	0	0	0	0	0	0	0	0	2	0	0	0	0	0	0	0	0	0	0	0	0	0	0	0	0	0	0	0	0	0	0	0	0	0	0	0	0	0	0	0	0	0
denovo2337	0	0	0	0	0	0	0	0	0	0	0	0	0	0	0	0	0	0	0	0	0	0	0	0	0	0	0	0	0	0	0	0	0	0	0	0	0	0	0	0	0	0	0	2	0	0	0	0	0
denovo2339	0	0	0	0	2	0	0	2	1	0	0	0	0	0	0	0	0	0	0	0	0	0	0	0	0	2	0	0	0	1	0	0	0	0	0	0	0	0	0	0	0	1	0	0	1	1	0	3	0
denovo2341	0	0	1	0	0	1	2	0	0	0	0	0	0	0	0	0	0	0	1	0	0	0	0	0	0	1	0	0	0	0	0	0	0	0	0	1	0	0	0	2	0	0	0	0	0	0	0	1	0
denovo2342	0	0	1	0	6	0	0	7	1	35	0	1	12	17	0	36	16	36	125	2	1	20	5	21	28	1	9	39	15	1	0	7	1	2	0	1	0	0	25	5	34	0	2	45	0	9	0	1	4
denovo2344	0	0	0	0	0	0	0	0	0	0	0	0	0	0	0	0	0	0	0	0	0	0	0	0	0	0	0	0	0	0	0	0	0	0	0	0	0	0	0	0	0	0	0	0	0	0	0	0	0
denovo2345	0	0	0	0	0	0	0	0	0	0	0	0	0	0	0	0	0	1	0	0	0	0	0	0	0	0	0	0	0	0	0	0	0	0	0	0	0	0	0	0	0	0	0	0	0	0	0	0	0
denovo2346	0	0	0	0	0	0	0	0	0	0	0	0	0	0	0	0	0	0	0	0	2	0	0	0	0	0	0	0	0	0	0	0	0	0	0	0	0	0	0	0	0	0	0	0	0	0	0	0	0
denovo2349	0	0	0	0	0	0	0	0	0	0	0	0	0	0	0	0	0	0	0	0	0	0	0	0	0	0	0	0	0	0	0	0	0	0	0	0	0	0	0	0	0	0	0	0	0	0	0	0	0
denovo2350	1	0	3	0	0	1	0	0	0	0	0	0	0	0	1	0	0	0	0	0	0	0	0	0	0	3	0	0	0	0	0	0	0	0	0	0	1	0	2	0	0	0	1	0	0	0	0	2	0
denovo2352	0	0	0	0	0	0	0	0	0	0	0	0	0	2	0	2	0	0	6	0	0	0	0	1	13	0	1	0	0	0	0	0	0	0	0	0	0	0	0	0	0	0	0	0	0	0	0	0	0
denovo2353	7	1	12	6	49	7	8	19	10	2	6	16	4	8	10	3	1	1	12	7	4	3	2	4	10	72	10	5	8	29	20	5	10	15	13	8	16	5	3	12	5	7	29	16	22	42	13	5	15
denovo2354	1	0	1	0	0	0	1	0	1	0	0	1	0	0	1	0	1	0	1	0	0	0	0	0	0	0	0	1	0	0	0	0	0	0	0	1	0	0	0	0	0	0	0	0	0	0	0	0	0
denovo2356	0	0	0	0	0	0	0	0	0	0	0	0	0	0	0	0	0	0	0	0	0	0	0	0	0	0	0	0	0	0	0	0	0	0	0	0	0	0	0	0	0	0	0	0	0	0	0	0	0
denovo2360	2	0	0	0	0	0	0	0	1	0	0	1	0	0	0	0	0	0	0	0	0	0	0	0	0	0	0	0	0	0	1	0	0	0	1	0	0	0	0	0	0	0	0	0	0	0	1	0	0
denovo2361	0	0	0	1	0	0	0	0	0	0	0	0	0	0	0	0	0	0	0	0	0	0	0	0	0	0	0	0	0	0	0	0	0	0	0	0	0	0	0	0	0	0	0	0	0	0	0	0	0
denovo2363	0	0	0	0	0	0	0	0	0	0	0	0	0	0	0	0	0	0	0	0	0	0	0	0	0	0	0	1	0	0	0	0	0	0	0	0	0	0	0	0	0	0	0	1	0	0	0	0	0
denovo2364	0	2	2	0	7	5	0	3	4	0	2	5	1	0	4	1	0	1	3	0	0	0	0	2	0	1	0	0	1	2	8	3	1	1	2	0	7	0	0	1	0	0	3	0	4	2	2	4	0
denovo2365	3	1	0	0	0	1	0	0	2	0	0	0	0	0	0	0	0	0	0	0	0	0	0	0	0	1	1	1	0	0	0	0	0	0	0	0	2	0	1	0	0	0	0	0	0	0	0	0	0
denovo2366	0	0	0	0	0	0	0	0	0	0	0	2	0	0	1	0	0	0	0	0	0	0	0	0	0	0	0	0	0	0	0	0	0	0	0	0	0	0	0	0	0	0	0	0	0	0	0	0	0
denovo2367	0	0	0	0	3	1	0	7	0	1	0	6	3	15	0	15	0	15	44	1	1	2	0	1	0	2	0	15	24	9	0	18	0	0	4	0	0	0	0	1	7	9	0	10	2	0	0	0	0
denovo2369	0	0	0	0	0	0	0	0	0	0	0	0	0	0	0	0	0	0	0	0	0	0	0	0	0	0	0	0	0	0	0	0	0	1	0	0	0	0	0	0	1	0	0	0	0	0	0	0	0
denovo2370	0	0	0	0	0	0	0	0	0	0	0	0	0	0	0	0	0	0	0	0	0	0	0	0	0	2	0	0	0	0	0	0	0	0	0	0	0	0	0	0	0	0	0	0	0	0	0	0	0
denovo2371	0	0	0	1	0	0	0	0	0	0	0	0	0	2	0	0	6	10	1	0	1	0	0	2	0	0	0	0	0	0	0	0	0	0	0	0	0	0	0	0	0	0	0	0	0	0	0	0	0
denovo2372	0	0	0	0	0	0	0	0	0	0	0	0	0	0	0	0	0	0	2	0	0	0	0	0	0	0	0	0	0	0	0	0	0	0	0	0	0	0	0	0	0	0	0	0	0	0	0	0	0
denovo2374	1	0	10	5	21	0	10	7	2	18	3	46	8	27	16	33	43	14	28	6	1	22	3	14	12	9	4	21	34	10	10	5	1	2	2	5	0	0	51	5	5	9	2	27	1	9	0	2	5
denovo2375	0	0	0	0	0	0	0	0	0	0	0	0	0	0	0	0	0	0	0	0	0	0	0	0	0	0	0	0	0	0	0	0	0	0	0	0	0	0	0	0	0	0	0	0	0	0	0	0	0
denovo2377	0	0	0	0	0	0	0	0	0	0	0	0	0	0	0	0	0	0	0	0	1	0	0	0	0	0	0	0	0	0	0	0	1	0	0	0	0	0	0	0	0	0	0	0	0	0	0	0	0
denovo2378	0	0	1	0	0	0	0	0	1	0	0	0	0	0	0	0	0	0	0	0	0	0	0	0	0	0	0	0	0	0	0	0	0	0	0	0	0	0	0	0	0	2	0	0	0	0	0	0	0
denovo2379	0	0	0	0	0	0	0	0	0	0	0	0	0	0	0	0	0	0	0	0	0	0	0	0	0	0	0	0	0	0	0	0	0	0	0	0	0	0	0	0	0	0	0	0	0	0	0	0	1
denovo2380	0	0	0	0	0	0	0	0	0	0	0	0	3	0	0	0	0	0	0	0	0	0	0	0	0	0	0	0	0	0	0	0	0	0	0	0	0	0	0	0	0	0	0	0	0	0	0	0	0
denovo2382	0	0	0	0	0	0	0	0	0	0	0	0	0	0	0	0	0	0	0	0	0	0	0	0	0	0	0	0	0	0	0	0	3	0	0	0	0	0	0	0	0	0	0	0	0	0	0	0	0
denovo2387	0	0	0	0	0	0	0	0	0	0	0	0	0	0	0	0	0	0	0	0	0	0	0	0	0	0	0	0	0	0	0	0	0	0	0	0	0	0	0	0	0	0	0	0	0	0	0	0	0
denovo2388	0	0	0	0	0	0	0	0	0	0	0	0	0	0	0	0	0	0	0	0	0	0	0	0	0	0	0	0	0	0	0	0	0	0	0	0	0	0	0	0	0	0	0	0	0	0	0	0	0
denovo2389	0	0	0	0	0	0	0	0	0	0	0	0	0	1	0	0	0	0	0	0	0	0	0	3	0	0	0	0	0	0	0	0	0	0	0	0	0	0	0	0	0	0	0	0	0	0	0	0	0
denovo2390	0	0	0	0	0	0	0	0	0	0	0	0	0	0	0	0	0	0	0	0	0	0	0	0	0	0	0	0	0	0	0	1	1	0	0	0	0	0	0	0	0	0	0	0	0	0	0	0	0
denovo2391	0	0	0	0	0	0	0	0	0	0	0	2	0	1	0	0	1	0	0	0	0	3	0	3	1	0	0	1	0	5	0	1	0	1	4	0	0	0	2	0	0	0	0	3	1	1	0	0	1
denovo2392	0	0	0	5	0	0	0	0	0	0	0	0	0	0	0	0	0	0	0	0	4	0	0	1	0	0	0	0	0	0	0	0	0	0	0	0	0	0	0	0	0	0	0	0	0	0	0	0	0
denovo2393	0	0	0	0	0	0	0	0	0	0	0	0	0	0	0	0	0	0	1	0	0	0	0	0	0	0	0	0	0	0	0	0	1	0	0	0	0	0	1	1	0	0	0	0	0	1	0	0	0
denovo2394	0	0	0	0	0	0	0	0	0	0	0	0	0	0	0	0	0	0	0	0	1	0	0	0	0	0	0	0	0	0	0	0	0	0	0	0	0	0	0	0	0	0	0	0	0	0	0	0	0
denovo2395	0	0	0	0	0	0	0	0	2	0	0	0	0	0	0	1	0	0	1	0	0	0	0	0	0	0	0	0	0	0	0	0	0	0	0	0	0	0	0	0	0	0	0	0	1	0	0	0	2
denovo2396	2	1	2	0	0	4	1	0	0	0	0	4	0	5	3	6	5	6	2	0	0	4	3	2	0	0	1	1	0	0	0	0	0	3	2	0	2	0	13	0	0	0	0	6	1	0	0	0	0
denovo2398	0	0	0	0	0	0	0	0	0	0	0	0	0	0	0	0	0	0	0	0	0	1	0	0	0	0	0	0	0	0	0	0	0	0	0	0	0	0	0	0	0	0	0	0	0	0	0	0	0
denovo2399	4	0	15	3	7	4	2	12	3	6	5	4	12	8	3	11	3	8	7	2	2	7	0	3	1	2	1	9	4	7	1	3	1	1	8	3	4	1	9	2	0	7	4	2	3	8	1	2	3
denovo2400	6	0	0	1	1	1	0	1	0	1	0	5	5	0	0	2	6	6	4	1	1	1	1	1	4	1	0	2	3	2	0	0	0	0	3	1	0	0	1	2	1	0	0	5	0	0	1	0	0
denovo2403	0	0	0	1	0	0	0	0	0	0	0	0	1	0	0	0	0	4	0	0	1	0	0	5	0	0	0	0	0	0	0	0	0	0	0	0	0	0	0	0	0	0	0	0	0	0	0	0	0
denovo2404	0	0	1	0	1	0	0	0	0	0	0	0	0	0	0	0	0	0	0	0	0	0	0	0	0	0	0	0	0	0	1	0	0	0	0	0	0	0	0	0	0	0	0	0	0	0	0	0	1
denovo2406	0	0	0	0	0	0	0	0	0	0	0	0	0	0	0	0	0	0	0	0	1	0	2	0	1	0	1	0	0	0	0	0	0	0	0	0	0	0	1	0	0	0	0	0	0	0	0	0	0
denovo2407	0	0	0	0	0	0	0	1	0	0	0	0	0	1	0	0	0	0	0	0	0	0	0	0	0	0	0	0	0	0	0	0	0	0	2	0	0	0	0	0	0	0	0	0	0	0	0	0	0
denovo2408	0	0	0	0	2	1	1	0	0	0	0	0	1	0	0	0	0	0	0	0	0	0	0	0	3	0	0	0	0	1	0	0	0	1	0	0	0	0	0	1	0	0	0	1	0	0	0	1	0
denovo2409	0	0	0	0	0	2	0	0	0	0	0	0	0	0	0	0	0	0	0	0	0	0	0	0	0	0	0	0	0	0	0	0	0	0	0	0	0	0	0	0	0	0	0	0	0	0	0	0	0
denovo2411	0	0	3	2	0	0	0	0	0	1	0	0	0	0	0	0	0	0	0	0	0	0	0	0	1	0	0	0	0	0	0	0	0	0	0	0	0	0	0	0	0	0	0	0	0	0	0	0	0
denovo2412	0	0	0	0	0	0	0	0	0	0	0	0	0	0	0	0	0	0	0	0	0	0	0	0	0	0	0	0	0	0	0	0	0	0	0	0	0	0	0	0	2	0	0	0	0	0	0	0	0
denovo2415	0	0	0	0	0	0	0	0	0	0	0	0	0	0	0	0	0	0	0	0	0	0	0	0	0	2	0	0	0	0	0	0	0	0	0	0	0	0	0	0	0	0	0	0	0	1	0	0	0
denovo2416	0	0	0	0	0	0	0	0	0	0	0	0	0	1	0	0	0	0	0	0	0	0	0	0	0	0	0	0	0	0	0	0	0	0	0	0	0	0	0	0	0	0	0	0	0	0	0	0	0
denovo2417	0	0	0	0	0	0	1	0	0	0	0	0	1	0	0	0	0	0	0	0	0	0	0	0	0	1	0	0	0	0	0	0	4	4	0	0	0	0	0	0	0	0	1	0	0	2	1	0	0
denovo2418	0	0	0	0	0	0	0	0	0	0	0	0	0	0	0	0	0	0	0	2	0	0	0	0	0	0	0	0	0	0	0	0	0	0	0	0	0	0	0	0	0	0	0	0	0	0	0	0	0
denovo2419	0	0	0	0	0	0	0	0	0	0	0	0	0	0	0	0	0	0	0	0	0	0	0	1	0	0	0	10	0	0	0	0	0	0	0	0	0	0	6	0	0	0	0	0	0	0	0	0	0
denovo2420	0	0	0	50	0	0	0	0	1	3	0	0	6	2	0	9	1	7	1	2	51	1	0	3	19	0	0	7	8	1	0	14	0	0	0	0	0	0	0	0	2	0	0	3	0	2	0	0	0
denovo2421	0	0	0	2	0	0	0	0	0	2	0	0	0	0	0	0	0	4	0	0	1	0	0	0	0	0	0	0	0	0	0	0	0	0	4	0	0	0	0	0	0	1	0	1	0	0	0	0	0
denovo2422	1	0	0	0	0	0	0	1	0	1	0	0	1	0	0	0	0	0	0	0	0	0	0	0	0	0	0	1	0	0	0	0	0	0	0	0	0	0	0	0	0	1	0	0	0	0	0	0	1
denovo2424	0	0	0	0	2	0	0	0	0	0	0	0	0	0	0	0	0	0	0	0	0	0	0	0	0	0	0	0	0	0	0	0	0	0	0	0	0	0	0	0	0	0	0	0	0	0	0	0	0
denovo2425	0	0	0	0	1	0	1	0	1	0	0	1	1	0	0	0	0	0	0	0	0	0	0	0	0	0	0	0	0	0	0	0	0	0	0	0	0	0	0	0	0	0	0	0	0	0	0	0	0
denovo2426	0	1	1	1	1	0	0	1	0	1	0	0	1	0	1	1	0	0	2	0	2	0	0	0	0	0	0	1	0	0	0	0	0	0	1	2	0	0	0	0	0	1	0	0	0	1	0	0	0
denovo2427	0	0	0	0	0	0	0	0	0	0	0	0	0	0	0	0	0	0	0	0	0	0	0	0	0	0	0	0	0	0	0	0	0	0	0	0	0	0	0	0	0	0	0	0	0	0	0	0	0
denovo2428	0	0	0	0	0	0	4	2	0	0	0	0	0	0	0	0	0	0	0	0	0	0	0	0	0	0	1	0	0	0	0	0	0	11	0	0	0	0	0	4	0	2	0	0	2	15	0	1	0
denovo2430	0	0	0	0	0	0	0	0	0	1	0	0	0	1	0	0	0	0	0	0	0	0	0	0	1	0	0	2	0	0	0	0	0	0	0	0	0	0	0	0	1	0	0	1	0	0	0	0	0
denovo2431	0	0	0	0	0	0	0	1	0	0	0	0	0	0	0	0	0	0	0	0	0	0	0	0	0	0	0	0	0	0	0	0	0	0	0	0	0	0	0	0	0	0	1	0	0	0	0	0	0
denovo2432	0	0	0	0	0	0	0	0	0	0	0	0	0	0	0	0	0	0	0	0	0	1	0	0	0	0	0	0	0	0	0	0	0	0	0	0	0	0	0	0	0	0	0	0	0	0	0	0	0
denovo2433	1	3	1	0	4	3	2	1	1	0	0	1	0	0	3	0	0	0	0	0	0	0	0	0	2	11	0	0	0	4	2	0	2	0	2	0	8	0	2	1	0	0	0	0	2	2	0	0	5
denovo2434	0	0	0	0	0	0	0	0	0	0	0	0	0	0	0	4	0	0	4	4	2	0	0	0	0	0	0	0	0	0	0	5	0	0	0	0	0	0	0	0	0	0	0	0	0	0	0	0	0
denovo2435	0	0	0	0	0	0	0	0	0	0	1	0	0	0	2	0	0	0	0	0	0	0	0	0	0	0	0	0	0	1	0	0	1	0	0	0	0	0	0	0	0	0	0	0	0	0	0	0	0
denovo2436	5	3	18	0	22	14	4	13	19	18	4	5	9	18	4	7	11	4	22	4	0	4	4	4	3	13	2	4	5	2	11	2	0	16	6	5	16	3	12	12	2	6	13	10	8	0	15	2	31
denovo2437	0	0	0	0	0	4	0	0	0	0	0	0	0	0	0	0	0	0	0	0	0	0	0	0	0	0	0	0	0	0	0	0	0	0	0	0	0	0	0	0	0	0	0	0	0	0	0	0	0
denovo2438	0	0	0	0	0	0	0	0	0	0	0	0	0	0	0	0	0	0	0	0	0	0	0	0	0	0	0	0	0	0	0	0	1	0	0	0	0	0	0	0	0	0	0	0	0	0	0	0	0
denovo2439	1	0	0	0	1	3	0	1	0	0	0	1	0	0	1	0	1	0	1	0	0	0	0	2	0	0	0	0	0	0	2	0	2	0	2	0	0	1	4	1	0	1	0	3	0	0	3	0	1
denovo2441	0	0	0	0	0	0	0	0	0	0	0	0	0	0	0	0	0	0	0	0	0	0	0	2	0	0	1	0	0	0	0	0	0	0	1	0	0	0	0	0	0	0	0	0	0	0	0	0	0
denovo2442	0	0	0	0	0	0	0	0	0	0	0	0	0	0	0	0	0	0	0	0	0	0	0	0	0	0	0	0	0	0	0	0	2	0	0	0	0	0	0	0	0	0	0	0	0	0	0	0	0
denovo2443	0	0	0	0	0	0	0	0	0	0	0	1	0	0	0	0	0	0	0	0	8	0	0	0	0	0	0	0	0	0	0	0	0	0	0	0	0	0	0	0	0	0	0	0	0	0	0	0	0
denovo2445	1	0	0	0	0	0	0	0	1	1	1	0	0	7	0	4	4	2	23	1	4	10	2	1	5	1	0	4	1	0	0	0	0	0	1	0	0	0	1	1	1	0	0	10	0	1	1	0	0
denovo2446	0	0	0	2	0	0	0	0	0	0	0	0	0	0	0	0	0	0	0	0	0	0	0	1	0	0	0	0	0	0	0	0	0	0	0	0	0	0	0	0	0	0	0	0	0	0	0	0	0
denovo2447	0	0	0	0	0	0	0	0	0	0	0	0	0	0	0	3	2	5	59	0	1	1	0	0	0	0	0	1	0	0	0	0	0	0	0	0	0	0	0	0	0	0	0	1	0	0	0	0	0
denovo2450	0	0	0	1	0	0	0	0	0	0	0	0	0	0	0	0	0	0	0	0	5	0	0	0	0	0	0	0	0	0	0	0	0	0	0	0	0	0	0	0	0	0	0	0	0	0	0	0	0
denovo2451	0	0	1	0	3	0	0	1	3	1	0	0	0	1	0	1	0	0	1	1	0	0	0	0	0	4	0	0	0	3	0	0	1	0	0	1	0	1	1	2	0	0	0	0	0	0	0	0	0
denovo2452	0	0	0	0	2	0	0	2	1	0	0	1	0	0	0	1	0	0	0	0	0	0	0	0	0	2	0	0	0	0	1	0	0	0	0	0	1	0	0	0	0	0	0	0	1	0	0	0	1
denovo2455	0	0	0	2	0	0	0	0	0	0	0	0	0	0	0	0	0	0	0	0	0	0	0	0	0	0	0	0	0	0	0	0	0	0	0	0	0	0	0	0	0	0	0	0	0	0	0	0	0
denovo2456	0	0	3	0	1	0	0	0	0	0	0	0	0	0	0	0	0	0	0	0	0	0	0	0	0	0	0	0	0	0	0	0	0	0	0	0	0	0	0	0	0	0	0	0	0	0	0	0	0
	3628	1359	2954	3316	5210	3154	1515	4096	3333	4008	1970	4258	3868	3738	3166	3934	2379	3099	6371	1372	3803	3711	1056	1994	3008	5201	1698	4269	2089	3728	1895	1304	2644	1793	2540	1613	1636	1096	3915	2093	2010	2697	2688	3994	1661	4547	1564	1515	2815
[truncated: 20 more columns]
